# Supplementary material for: Meningioma epigenetic grouping reveals biologic drivers and therapeutic vulnerabilities
Source: Research Square preprint supplement (doi:10.21203/rs.3.rs-113172/v1), 2020-12-09
Supplement: Supplementary file 6 [file 82809262621dce2f6a70a24b.xlsx]

## Sheet: Merlin-intact
Extended Data Table 6. Differentially expressed genes across meningioma epigenetic groups.
Gene	log2FoldChange	lfcSE	pvalue	padj
SPRR2A	6.89023	0.977559	2.57e-08	2.25e-06
SCGB2A1	6.41826	0.996293	1.56e-07	1.13e-05
SPRR2D	5.38354	0.741878	5.94e-05	0.00184454
SERPINA11	4.67903	0.505541	1.89e-06	9.97e-05
CTSE	4.49747	0.450532	1.08e-19	8.65e-17
WNT16	4.48964	0.483653	2.51e-17	1.6e-14
PRB4	4.37322	0.786849	0.00182573	0.0317717
ILDR2	4.36689	0.264746	4.1e-49	6.54e-45
GALR1	4.32156	0.340773	6.54e-17	3.94e-14
SPRR2F	4.15458	0.740319	1.07e-07	8.15e-06
TUBA4B	3.9367	0.36632	9.59e-22	1.13e-18
SYT10	3.93341	0.46612	1.44e-11	2.9e-09
S100P	3.91387	0.345488	7.26e-24	1.1e-20
BMP3	3.79067	0.520575	1.72e-06	9.2e-05
TBATA	3.73941	0.605955	9.7e-08	7.49e-06
DEFB1	3.73065	0.337723	1.62e-22	2.06e-19
RP11-438D14.2	3.70082	0.689329	0.000114964	0.00319231
SPRR3	3.62268	0.799055	4.39e-08	3.64e-06
FOXI2	3.47972	0.323712	5.08e-21	5.23e-18
SLC26A7	3.46286	0.34635	1.78e-18	1.27e-15
DLGAP1-AS5	3.39883	0.625735	1.96e-10	2.93e-08
HAS1	3.38321	0.410062	2.43e-19	1.89e-16
QRFPR	3.35024	0.345091	1.34e-42	1.07e-38
MTCO3P12	3.3033	0.229951	7.19e-06	0.000309875
AQP3	3.28217	0.306582	1.72e-20	1.63e-17
FAM162B	3.24729	0.304154	2.54e-20	2.25e-17
RFX6	3.24159	0.529145	3.28e-08	2.79e-06
LRRC31	3.13864	0.286955	5.76e-21	5.75e-18
SNTG2	3.06442	0.283973	2.53e-20	2.25e-17
TF	3.05665	0.40718	5.07e-11	8.61e-09
AC114808.2	3.05447	0.442173	2.3e-09	2.65e-07
MAEL	3.00395	0.288798	6.47e-19	4.7e-16
FER1L6	2.99825	0.433812	1.2e-09	1.48e-07
RP1-32I10.11	2.97996	0.551392	1.58e-06	8.65e-05
FAM159B	2.96338	0.468259	1.03e-05	0.00041709
AKR1B10P1	2.92641	0.342776	3.08e-29	9.82e-26
LINC01330	2.90355	0.43646	0.00218459	0.0368907
RP1-272L16.1	2.88536	0.592271	1.25e-07	9.34e-06
MUC3A	2.87653	0.305458	1.1e-15	5.31e-13
APOD	2.85003	0.356205	6.4e-12	1.35e-09
SBK2	2.84965	0.720598	0.00142165	0.0260457
GADL1	2.80103	0.407439	2.3e-09	2.65e-07
RP11-1090M7.1	2.7646	0.508189	0.000861537	0.0169929
AKR1B10	2.76447	0.310339	2.28e-32	1.21e-28
GSTA9P	2.74614	0.416826	9.65e-09	9.57e-07
GCOM1	2.71918	0.312363	1.88e-13	5.72e-11
PCSK9	2.70709	0.283337	1.04e-15	5.13e-13
RP11-404G16.2	2.69164	0.614723	4.86e-05	0.00156024
TPO	2.69074	0.271291	9.33e-17	5.41e-14
RPRM	2.68053	0.388831	3.51e-09	3.95e-07
SCGN	2.66711	0.300896	9.06e-14	2.92e-11
MTUS2	2.6641	0.307345	3.37e-13	9.28e-11
AGBL1-AS1	2.66051	0.555455	6.87e-05	0.00208205
ADAMTS19	2.64838	0.386125	3.88e-09	4.29e-07
APCDD1	2.64475	0.245371	3.67e-19	2.79e-16
PRR35	2.63052	0.483566	1.51e-06	8.36e-05
CHODL	2.60904	0.324945	2.62e-16	1.42e-13
FUT9	2.59494	0.596489	5.95e-05	0.0018468
LMX1A	2.59294	0.400607	2.57e-08	2.25e-06
RP11-438D14.3	2.55953	0.560221	1.99e-05	0.000736417
AC012501.3	2.55059	0.567735	7.17e-05	0.00216292
NPY1R	2.54762	0.265082	1.8e-15	8.32e-13
HHIPL2	2.54469	0.265717	2.27e-15	1.02e-12
PLPPR4	2.53939	0.324013	4.85e-11	8.32e-09
LPAR3	2.53203	0.309045	7.61e-12	1.59e-09
CTB-147C13.1	2.50028	0.550169	4.2e-05	0.00138712
KCNH5	2.4915	0.562787	5.53e-05	0.00173464
KLK7	2.4901	0.452161	1.6e-06	8.69e-05
ADGRL3	2.48945	0.312455	3.04e-11	5.64e-09
RP11-807H7.2	2.47361	0.546282	4.76e-05	0.00153122
GAL	2.45597	0.327146	3.53e-10	4.97e-08
PRMT8	2.44569	0.270121	9.57e-14	3.06e-11
RP11-696F12.1	2.44565	0.585399	2.03e-06	0.000105888
ECEL1	2.44122	0.390395	2.39e-12	5.75e-10
PTHLH	2.43741	0.32175	2.72e-10	3.93e-08
RP11-63N8.3	2.43674	0.626448	0.00101279	0.019518
TLL1	2.43467	0.317075	1.68e-10	2.52e-08
LINC00593	2.41801	0.481076	9.54e-06	0.000390977
ADAMTS19-AS1	2.40367	0.434771	1.6e-06	8.7e-05
RP11-343B18.2	2.39246	0.509826	3.02e-05	0.00104603
MIA2	2.39134	0.432731	4.3e-06	0.000202009
DCAF12L2	2.38601	0.352628	1.39e-08	1.31e-06
EDN2	2.38511	0.330777	1.88e-09	2.22e-07
RSPO2	2.38165	0.441232	3.01e-06	0.000149856
ALPL	2.36008	0.279108	4.29e-12	9.64e-10
COX6B2	2.32008	0.300194	2.16e-10	3.17e-08
AKNAD1	2.31172	0.286892	4.51e-11	7.83e-09
SLC16A9	2.31084	0.202884	7.16e-20	5.86e-17
CTD-2034I21.2	2.30816	0.635023	0.000760455	0.0153306
RP11-655M14.14	2.27894	0.345184	4.23e-08	3.52e-06
SLC4A10	2.27164	0.49871	5.6e-05	0.00175112
NCCRP1	2.26864	0.268773	7.52e-12	1.58e-09
ABCB1	2.23195	0.273248	3.98e-11	7.02e-09
FGF10	2.23018	0.4783	4.43e-05	0.00144715
RP11-236J17.6	2.22424	0.478928	3.53e-07	2.34e-05
RP11-286B14.1	2.21432	0.40863	4.27e-06	0.000201014
VWDE	2.2059	0.478693	5.43e-05	0.0017055
RP11-283I3.1	2.19698	0.467025	4.36e-05	0.00143027
CYP4F3	2.19405	0.286744	4.8e-10	6.47e-08
MUC4	2.19233	0.327144	3.74e-08	3.15e-06
UPK1B	2.18574	0.378526	1.34e-06	7.61e-05
MMRN1	2.18495	0.220914	4.21e-15	1.77e-12
KCNIP4	2.17573	0.311102	1.21e-08	1.15e-06
CTB-49A3.2	2.17434	0.493255	0.000102013	0.00288281
AC116614.1	2.16808	0.311582	1.42e-08	1.33e-06
SLC9A2	2.16571	0.308643	1.13e-08	1.09e-06
UCP1	2.16382	0.2867	1.11e-09	1.39e-07
ST8SIA6	2.16088	0.301939	6.34e-09	6.69e-07
HES7	2.14686	0.23461	3.85e-13	1.05e-10
PES1P2	2.13687	0.428354	2.15e-05	0.000783189
CTD-2007L18.5	2.13201	0.23776	1.2e-12	3.04e-10
KRT16	2.12618	0.408202	7.74e-06	0.000329128
GUCY2GP	2.1218	0.556149	0.000962901	0.0187147
FTCD-AS1	2.1196	0.543743	0.000424593	0.00948438
RP11-1090M7.3	2.10348	0.359552	1.33e-06	7.54e-05
RN7SL823P	2.09184	0.446322	0.000260874	0.006364
LINC01269	2.08042	0.2775	1.63e-09	1.94e-07
MPPED1	2.07767	0.253996	9.2e-11	1.44e-08
KCNU1	2.07668	0.52749	0.000519222	0.0111727
RP11-384F7.2	2.07176	0.587987	0.00102954	0.0197454
EPS15P1	2.06867	0.604409	0.00131974	0.024445
EGLN3	2.06815	0.327377	2.83e-07	1.93e-05
LINC00371	2.06722	0.355058	1.68e-06	9.05e-05
AC060834.2	2.05677	0.287531	9.23e-09	9.21e-07
RP11-644L4.1	2.05522	0.45117	0.00010643	0.00299439
BNIP3P9	2.05072	0.378226	7.14e-06	0.000308566
RP11-288A5.2	2.04848	0.350727	1.55e-06	8.51e-05
AACSP1	2.04032	0.394224	1.55e-05	0.000590578
TLL2	2.03422	0.224894	1.59e-12	3.88e-10
FSTL4	2.03171	0.372225	6.51e-06	0.000286619
AGBL1	2.03012	0.404364	1.57e-12	3.86e-10
SGK223	2.02536	0.196288	1.46e-15	6.95e-13
SIRPB3P	2.02501	0.428136	5.77e-05	0.00179684
SNRPGP4	2.02464	0.318062	3.17e-07	2.14e-05
CTC-575I10.1	2.02295	0.403134	4.93e-05	0.00157553
RP11-685M7.5	2.02184	0.384111	1.29e-05	0.000501914
TDRD15	2.01604	0.294289	4.59e-08	3.77e-06
KRT19	2.01318	0.261665	1.27e-09	1.55e-07
RP11-662J14.1	2.00069	0.44637	0.000617298	0.0128838
HCN1	1.99335	0.481284	0.000299293	0.00712801
CYP4F12	1.98697	0.233739	3.67e-11	6.62e-09
SLC6A3	1.98269	0.395396	2.96e-05	0.00102798
GPER1	1.98167	0.207424	2.18e-05	0.000792299
MSLN	1.97644	0.304737	0.00101929	0.0195961
RP11-453M23.1	1.94309	0.532636	0.00101129	0.0195127
OR7E11P	1.9412	0.349591	6.55e-06	0.000288266
PGR	1.93052	0.229521	8.63e-11	1.37e-08
C5orf58	1.92637	0.200746	2.19e-13	6.54e-11
PLA2G2A	1.92507	0.405389	0.000747458	0.0151163
PENK	1.92446	0.359826	5.21e-05	0.0016469
BTC	1.92197	0.332413	3.2e-06	0.00015748
SEC14L6	1.91978	0.19078	1.88e-14	6.91e-12
RP11-804N13.1	1.90872	0.369737	2.17e-05	0.000790745
HSPA8P4	1.90114	0.209598	4.49e-12	1e-09
SAMD7	1.90042	0.417942	9.66e-05	0.00274754
PHACTR3	1.89941	0.402394	7.92e-07	4.82e-05
TTLL2	1.89552	0.370047	3.13e-05	0.00107895
FBXO32	1.88577	0.220059	5.77e-11	9.6e-09
RP11-655M14.4	1.88017	0.25687	1.47e-08	1.36e-06
HIF1A-AS2	1.87913	0.289619	3.03e-07	2.06e-05
HMGB2P1	1.87464	0.359226	2.3e-05	0.000827234
IL1RL1	1.86897	0.288107	8.23e-06	0.000346277
DYNAP	1.86712	0.510371	0.00257649	0.0421707
SCEL	1.85733	0.401694	0.000123864	0.00339223
IMPG2	1.85532	0.219331	1.23e-10	1.89e-08
CTC-558O2.1	1.85021	0.286133	4.4e-07	2.86e-05
TSPAN1	1.84534	0.280673	3.1e-07	2.1e-05
ART2P	1.8428	0.373872	6.06e-05	0.00186978
INSL4	1.82582	0.415387	0.00028732	0.0068778
COL23A1	1.82495	0.326369	8.9e-06	0.000369808
EPHA5-AS1	1.82433	0.531201	0.00188859	0.0325991
ITGA2	1.8197	0.204617	2.23e-11	4.24e-09
C8orf31	1.81156	0.26287	1.14e-07	8.62e-06
MDGA2	1.81112	0.314705	5.78e-06	0.00026056
CTA-929C8.6	1.81001	0.196991	5.75e-12	1.23e-09
AC144450.1	1.80049	0.32671	1.22e-05	0.000478596
CCDC3	1.80002	0.277336	5.41e-07	3.45e-05
MLPH	1.79328	0.239206	1.28e-08	1.22e-06
RP11-65F13.3	1.79152	0.300811	3.27e-06	0.00016056
PEX5L	1.79016	0.276479	5.83e-07	3.68e-05
CES1	1.78548	0.399032	0.000224751	0.00560084
STK26	1.78446	0.193047	5.78e-12	1.23e-09
NCOA7-AS1	1.78428	0.337533	2.67e-05	0.000940728
RP11-97N19.2	1.78043	0.357773	6.43e-05	0.0019735
FAM124A	1.77086	0.178968	2.6e-13	7.41e-11
CPAMD8	1.77086	0.222587	2.15e-09	2.5e-07
SLC6A12	1.76951	0.308778	7.43e-06	0.000318311
CXorf49	1.75649	0.246231	6.52e-08	5.14e-06
RP3-428L16.2	1.75592	0.17641	2.24e-13	6.59e-11
ARHGEF3	1.75353	0.13367	1.22e-21	1.35e-18
MYZAP	1.74354	0.258962	3.12e-07	2.11e-05
RP11-779O18.2	1.73919	0.404395	0.000377286	0.00860563
RP11-30P6.6	1.72211	0.298927	8.49e-06	0.000355041
VWA5B1	1.72182	0.33312	4.64e-05	0.00149971
AC112198.1	1.72105	0.237035	5.33e-08	4.29e-06
SLC10A1	1.71058	0.285924	4.53e-06	0.000211268
CCDC68	1.71057	0.235712	5.72e-08	4.54e-06
QPCT	1.70556	0.213769	3.61e-09	4.03e-07
CTD-2527I21.15	1.70499	0.273002	1.9e-06	0.000100157
KIAA1644	1.70216	0.254009	4.48e-07	2.9e-05
LINC00661	1.69917	0.421964	1.33e-09	1.61e-07
CSDC2	1.6965	0.217839	8.4e-09	8.54e-07
HRASLS5	1.68445	0.282207	5.45e-06	0.000247877
KCNC4-AS1	1.68403	0.269986	2.25e-06	0.00011606
P2RX5	1.68086	0.285717	7.12e-06	0.000308255
NPY5R	1.68058	0.452397	0.00156856	0.0280768
RP11-283I3.4	1.68039	0.375669	0.000305767	0.00724337
RP11-283I3.2	1.6757	0.309294	2.76e-05	0.00096898
PRRG3	1.67045	0.307376	2.78e-05	0.000974891
SDR42E1	1.67006	0.34957	0.000157782	0.00415715
TRAV38-1	1.66138	0.36419	0.000260382	0.00635687
EHF	1.65752	0.208238	5.82e-09	6.17e-07
RP4-555D20.1	1.65526	0.367187	0.000313867	0.00741325
NDST4	1.64618	0.610733	9.17e-05	0.00263139
ITIH2	1.64349	0.263948	3.16e-06	0.00015583
SLC44A5	1.64097	0.357381	0.000272893	0.00660673
RIPK4	1.63755	0.293822	2.23e-05	0.000807219
RP13-463N16.6	1.63319	0.225975	1.1e-07	8.36e-06
RP5-1029K10.4	1.63116	0.40025	0.00088333	0.0173798
AKAP17BP	1.63073	0.357079	0.000297104	0.00709605
ZNF385B	1.62834	0.316878	7.53e-05	0.00225497
BCAR4	1.62639	0.344857	0.000197832	0.00503376
SLC26A2	1.61589	0.245399	1.18e-06	6.8e-05
CCDC64	1.61062	0.295212	3.48e-05	0.00118328
ABCC4	1.60964	0.210611	3.05e-08	2.63e-06
POU2AF1	1.60492	0.299797	4.71e-05	0.00151757
ISCA2P1	1.59919	0.320928	0.000140293	0.00376468
C7	1.58097	0.218298	1.5e-07	1.09e-05
RP11-793H13.3	1.58053	0.292757	3.94e-05	0.00131494
HECW2	1.57428	0.182723	9.49e-10	1.23e-07
HMSD	1.5728	0.357143	0.00052781	0.0113194
GPHA2	1.55744	0.245387	3.58e-06	0.000174739
C6	1.55639	0.324139	0.00187857	0.0324963
FAM83E	1.55479	0.280347	3.6e-05	0.00122096
SGPP2	1.55264	0.268313	1.94e-05	0.000724894
MIAT	1.5513	0.318679	0.000197097	0.00502307
RP11-384L8.1	1.55085	0.23206	1.32e-06	7.52e-05
CTD-2528A14.1	1.54928	0.393539	0.00173152	0.0304475
ACKR3	1.54911	0.226202	8.05e-07	4.88e-05
CALML3-AS1	1.54787	0.27257	2.63e-05	0.000930553
KRT6A	1.54726	0.502659	0.000254768	0.00624368
GRPEL2-AS1	1.54064	0.258475	1.31e-05	0.00051066
NR5A2	1.53745	0.2689	1.16e-09	1.44e-07
SLCO2A1	1.52929	0.178308	1.87e-09	2.21e-07
AKR1B15	1.52899	0.362473	4.22e-11	7.37e-09
NFE2	1.5262	0.259127	1.66e-05	0.000628538
MYO1A	1.52574	0.258471	1.62e-05	0.000614357
ELOVL7	1.52418	0.307956	0.000189189	0.00485641
RP11-678G15.2	1.5224	0.224926	1.25e-06	7.15e-05
TRAV39	1.5203	0.402948	0.00222094	0.0374085
SCN11A	1.51893	0.173411	1.03e-09	1.3e-07
SDR16C5	1.51389	0.360937	0.00101841	0.0195908
HS6ST2	1.5113	0.211633	4.19e-07	2.73e-05
GALNT15	1.51054	0.24216	6.88e-06	0.00029962
ST6GALNAC2	1.51052	0.210515	3.79e-07	2.5e-05
RP11-361L15.5	1.50609	0.243088	8.05e-06	0.000339398
B4GALT4-AS1	1.50574	0.349545	0.00120307	0.0226042
KCNC4	1.50122	0.159698	8.69e-11	1.37e-08
AC005355.2	1.5012	0.2736	5.22e-05	0.00164903
PLCXD2	1.50107	0.320528	0.000384506	0.0087391
ARHGEF28	1.5009	0.145202	1.31e-12	3.3e-10
ASPHD2	1.49841	0.199503	1.29e-07	9.6e-06
RP11-815J21.4	1.49568	0.243496	1.01e-05	0.000412337
PDE4C	1.49556	0.325416	0.000477048	0.0103983
LINC01558	1.49458	0.318395	0.000383193	0.00871546
ST6GALNAC1	1.49213	0.306473	0.000263516	0.00640888
ATP8B5P	1.49135	0.219212	1.29e-06	7.36e-05
CAPN6	1.48951	0.318131	0.00040448	0.00912165
KLRC2	1.48842	0.504046	7.47e-05	0.00224527
FAT3	1.48341	0.322072	0.000494947	0.0107226
SERPIND1	1.48199	0.265589	5.05e-05	0.00160424
C3orf36	1.47973	0.258099	3.38e-05	0.00115325
CHRDL1	1.47956	0.338921	0.000821297	0.0163609
ASS1P10	1.47719	0.262318	4.45e-05	0.00144881
GBP6	1.47094	0.348022	0.00107609	0.0205028
GSTO2	1.4693	0.264544	5.67e-05	0.00177115
HOOK1	1.46901	0.248717	2.28e-05	0.000822036
KCNMA1-AS1	1.46616	0.243839	1.67e-05	0.000631833
RP11-597M17.2	1.46607	0.301342	0.000304745	0.00722988
FOXO6	1.4656	0.185728	4.88e-08	3.97e-06
RP11-100L22.1	1.46549	0.269241	7.61e-05	0.00227234
SLC16A1	1.46167	0.171432	4.5e-09	4.9e-07
RP11-740N7.3	1.46037	0.317842	0.000473506	0.0103282
DLGAP1	1.4603	0.338335	0.000986604	0.0190941
SEC14L2	1.46017	0.210489	1.26e-06	7.18e-05
RP11-351J23.2	1.45512	0.391364	0.00306171	0.0482813
COX7A2P1	1.44884	0.366406	0.00199005	0.0340013
HCG22	1.44758	0.309382	0.000491221	0.0106781
DLG3-AS1	1.44736	0.290704	0.000248065	0.00609343
LINC01258	1.44732	0.310235	0.000494825	0.0107226
LINC01315	1.44643	0.177712	2.46e-08	2.17e-06
PKP2	1.44277	0.17756	2.84e-08	2.46e-06
ESR2	1.44082	0.291354	0.000281656	0.00676759
AC012123.1	1.43777	0.380721	0.00288708	0.0461658
REPS2	1.43679	0.170555	1.02e-08	1.01e-06
CTA-929C8.7	1.43645	0.223298	6.15e-06	0.000273699
LRRIQ4	1.4352	0.221043	5.96e-06	0.000267235
VWA7	1.43298	0.218104	4.58e-06	0.000212996
RP11-8P13.5	1.43269	0.234137	1.63e-05	0.000618363
ARHGAP44	1.42598	0.197651	6.93e-07	4.28e-05
RPS6KA2	1.42349	0.13648	3.39e-12	7.84e-10
NTSR1	1.42149	0.320246	0.000902308	0.0177095
CALML5	1.41926	0.602089	0.000304012	0.00721785
MANSC4	1.41525	0.331552	0.00132651	0.0245562
ANGPTL5	1.41404	0.315458	0.000857092	0.0169366
FAM20A	1.41207	0.22346	1.14e-05	0.000452987
KLB	1.40883	0.21178	4.42e-06	0.000207182
RAPGEF4-AS1	1.40312	0.368717	0.00306325	0.0482817
DHCR24	1.40043	0.195545	1.06e-06	6.23e-05
ZNF385D	1.39864	0.281444	0.000327727	0.00767813
RP11-132E11.2	1.39524	0.306603	0.000815709	0.0162699
DIRAS3	1.39489	0.21228	6.26e-06	0.000276384
GPR4	1.39459	0.147871	3.75e-10	5.18e-08
ARG2	1.39323	0.194068	1.07e-06	6.23e-05
PALMD	1.39275	0.208857	4.71e-06	0.000217508
RP11-1299A16.3	1.39141	0.202419	2.74e-06	0.000138385
LINC01443	1.38967	0.686739	4.23e-05	0.00139376
ENPP1	1.38914	0.238607	4.84e-05	0.00155447
RP11-443P15.2	1.3871	0.246439	7.93e-05	0.0023517
LINC00908	1.38704	0.357879	0.00292535	0.0466387
TMEM30B	1.38415	0.232245	3.65e-05	0.00123529
CTA-929C8.8	1.38337	0.194833	1.47e-06	8.2e-05
CES4A	1.37699	0.218509	1.52e-05	0.000580925
MTMR7	1.37669	0.200075	3.02e-06	0.000149959
SLPI	1.37395	0.263016	0.000201315	0.00510482
ABCA5	1.37357	0.167607	4.66e-08	3.81e-06
AIM1L	1.37195	0.326762	0.00175102	0.0306752
RP11-753H16.5	1.37012	0.24414	9.05e-05	0.00260825
SLC12A2	1.36843	0.173388	1.54e-07	1.11e-05
PRR15L	1.36655	0.280468	4.71e-08	3.85e-06
VWFP1	1.36612	0.233036	5.11e-05	0.00162134
ABCA9-AS1	1.36132	0.293552	0.000768657	0.0154569
CTD-2147F2.2	1.36039	0.336761	0.00242003	0.0400759
ECE1	1.35938	0.141458	3.66e-10	5.11e-08
ASS1P6	1.35704	0.189256	1.47e-06	8.2e-05
LRP4	1.34831	0.168648	1.31e-07	9.73e-06
RP11-331K21.1	1.34564	0.297955	0.00110035	0.0209151
MLLT4	1.34434	0.121116	9.09e-13	2.34e-10
CTD-2372A4.1	1.34396	0.330503	0.00281005	0.0451602
CA7	1.34285	0.298727	0.00115098	0.0217997
RP11-655B23.1	1.33813	0.295557	0.00103984	0.019931
PCAT29	1.33766	0.309367	0.00154123	0.0277297
VEGFA	1.33232	0.218105	3.56e-05	0.00120932
FOXA1	1.33138	0.36294	0.000155848	0.00410957
RP11-305F18.1	1.32886	0.292144	0.00104875	0.0200657
B3GNT8	1.32805	0.25049	0.000240862	0.00594392
RERGL	1.32368	0.296084	0.00132972	0.024587
APOL4	1.32366	0.218097	4.11e-05	0.00136172
ENTPD2	1.32193	0.275476	0.000729704	0.0147947
FLJ38576	1.31946	0.214057	3.46e-05	0.00118052
USP54	1.31873	0.124179	1.27e-11	2.57e-09
RAB27B	1.31582	0.270873	0.000658241	0.0136049
CTD-2104P17.2	1.30761	0.265608	0.000625344	0.0130177
SSX2IP	1.30553	0.177089	1.5e-06	8.34e-05
FAM91A1	1.30347	0.17071	6.99e-07	4.31e-05
WFDC2	1.30136	0.260288	0.0005379	0.0114972
GRIP2	1.29983	0.222269	8.69e-05	0.00252809
TIMP3	1.29912	0.191132	6.84e-06	0.000298906
LINC01482	1.2981	0.222103	8.58e-05	0.00250357
CCL28	1.29797	0.221221	8.54e-05	0.00249422
SH3BGRL2	1.29731	0.143258	8e-09	8.32e-07
NF2	1.28999	0.143093	9.63e-09	9.57e-07
PTPN13	1.28965	0.143117	8.58e-09	8.7e-07
TMEM200C	1.28658	0.241569	0.000299557	0.00712801
F2RL3	1.2803	0.234394	0.000232396	0.00575279
CLGN	1.27955	0.256636	0.000634365	0.0131797
SNCAIP	1.27314	0.244724	0.000430585	0.00960186
NR4A2	1.27202	0.294438	0.00228966	0.038381
IL20RB	1.26886	0.209319	6.8e-05	0.00206459
PHLDB2	1.25901	0.140137	1.9e-08	1.71e-06
INSIG1	1.25668	0.178836	7.09e-06	0.000307688
GAS2	1.25432	0.249965	0.000694982	0.014208
TJP1	1.25319	0.143738	3.89e-08	3.26e-06
FAM132A	1.25291	0.263201	0.00112622	0.0213769
RP11-563M4.1	1.25005	0.277452	0.00184163	0.0319961
RP11-44B19.1	1.25001	0.224566	0.000232193	0.00575223
RP11-438B23.2	1.24997	0.285311	0.00227991	0.0382521
RP5-1172A22.1	1.24921	0.197185	4.15e-05	0.00137342
SPTLC3	1.24792	0.192872	3.02e-05	0.00104603
NOX4	1.24513	0.235398	0.000434166	0.00965475
PMEPA1	1.24397	0.180971	1.08e-05	0.000435157
RP1-240K6.3	1.24183	0.295176	0.00311793	0.0489743
GNAZ	1.24048	0.190333	2.88e-05	0.00100684
TCN2	1.23287	0.1354	2.1e-08	1.88e-06
GABRG1	1.22914	0.411788	0.00149637	0.0270729
ANKDD1B	1.22823	0.199866	7.94e-05	0.00235345
AC007966.1	1.22111	0.232547	0.000562728	0.0119241
BTNL8	1.21914	0.257734	0.00145567	0.026432
CACNB2	1.21872	0.192287	5.72e-05	0.00178075
BTBD11	1.21614	0.20388	0.000130478	0.00354903
MN1	1.21385	0.174651	1.37e-05	0.000531796
CTA-503F6.2	1.21369	0.188185	4.46e-05	0.00145137
AHNAK2	1.21175	0.173926	1.34e-05	0.000520299
RNY3P8	1.21069	0.279424	0.00298141	0.0473187
PDE8B	1.20585	0.199011	0.000119208	0.00329296
MYO1D	1.20284	0.182612	3.35e-05	0.00114417
CACNA1H	1.20142	0.250014	0.00143227	0.0262251
STXBP6	1.19846	0.273123	0.0029968	0.0474687
POU5F2	1.18901	0.230657	0.000722919	0.0146758
NCALD	1.18747	0.238897	0.0011619	0.0219673
PPP1R36	1.18637	0.173402	2.31e-05	0.000832485
PAM	1.18211	0.121882	8.13e-09	8.37e-07
ST6GAL1	1.17925	0.15728	4.66e-06	0.000216219
MGAT3-AS1	1.17902	0.262271	0.00291152	0.0465101
KCNMA1	1.17714	0.231568	0.000888939	0.0174686
CYP3A4	1.17389	0.237789	0.00136953	0.0251629
TDRP	1.16841	0.156075	6.21e-06	0.000274981
SLC47A2	1.16562	0.178292	6.06e-05	0.00186978
SORBS1	1.1638	0.156736	7.48e-06	0.000319427
RUNDC3B	1.16037	0.229751	0.00119983	0.0225643
CD44	1.16025	0.197235	0.00025537	0.00625362
SLC9B2	1.15862	0.180974	9.11e-05	0.00261776
MGAT3	1.15861	0.152443	4.67e-06	0.000216235
CHSY3	1.15679	0.172819	4.62e-05	0.00149528
RP11-336A10.5	1.15641	0.247459	0.00234693	0.0391559
KIAA1462	1.15473	0.117241	8.06e-09	8.33e-07
PAPLN	1.15286	0.163658	2.15e-05	0.000783189
INHBB	1.15275	0.204654	0.00044588	0.00984667
FCN3	1.14957	0.238454	3.02e-06	0.000149959
KDM1B	1.1488	0.145419	2.79e-06	0.000140105
CYYR1	1.14879	0.163317	2.35e-05	0.000842815
GREB1	1.14869	0.202323	0.000421716	0.00943704
FAT4	1.14545	0.181546	0.000128065	0.00349829
BCR	1.1438	0.134816	6.07e-07	3.82e-05
MAB21L1	1.14267	0.242072	0.00241966	0.0400759
AMD1P2	1.13975	0.197287	0.000367599	0.00842681
RP11-323C15.2	1.13939	0.179652	0.000122843	0.00337248
KIF21A	1.13587	0.224612	0.00144323	0.0263353
LDLRAD4-AS1	1.13547	0.217399	0.00108273	0.020617
TNFAIP8L3	1.13414	0.149028	6.8e-06	0.000297534
FGR	1.13359	0.169318	6e-05	0.00185618
AFAP1L1	1.12866	0.14759	7.24e-06	0.000311191
FXYD6	1.12607	0.227544	0.00192028	0.0330104
LINC00472	1.12528	0.187126	0.000272114	0.00659789
MPPED2	1.12217	0.215142	0.0012461	0.0232565
MLLT4-AS1	1.12156	0.221518	0.00158309	0.0282893
ZNF483	1.11617	0.115863	3.71e-08	3.12e-06
CASZ1	1.11577	0.181309	0.000224854	0.00560084
EVA1C	1.11566	0.140324	4.27e-06	0.000201014
IQUB	1.11051	0.195296	0.000593074	0.0124351
RP11-382M14.1	1.10704	0.173068	0.000149505	0.00397514
LARP1B	1.10142	0.134752	2.83e-06	0.000142052
TESK2	1.10119	0.131476	1.66e-06	8.93e-05
CSPG4	1.10043	0.160361	6.17e-05	0.00189928
NT5E	1.09812	0.185346	0.00038155	0.00869047
EFCAB6	1.0959	0.13609	4.24e-06	0.000200943
TTC9	1.0949	0.152652	3.19e-05	0.00109659
GNG13	1.09446	0.562657	6.48e-05	0.00198635
HRH1	1.0936	0.172291	0.000196802	0.00501956
TEX2	1.09201	0.106052	1.06e-08	1.04e-06
FLT1	1.0919	0.18391	0.000448764	0.00988985
PVRL3	1.09189	0.134524	3.57e-06	0.00017448
AC004067.5	1.08771	0.16539	0.000134306	0.00362947
CCDC150	1.08674	0.179661	0.000374042	0.00855226
TMEM246-AS1	1.0858	0.224573	0.00298583	0.0473653
CH17-118O6.3	1.08516	0.211601	0.00192069	0.0330104
SERPINB8	1.0831	0.12483	1.1e-06	6.38e-05
FGD5	1.07723	0.123535	1.1e-06	6.41e-05
TMOD1	1.07678	0.149449	4.37e-05	0.00143186
KLF5	1.06277	0.148705	5.88e-05	0.001829
ANKRD33B	1.06271	0.144903	3.73e-05	0.00125626
LONRF3	1.06263	0.141606	2.62e-05	0.000928212
CTC-236F12.4	1.06034	0.210017	0.00262072	0.0427849
A4GALT	1.05851	0.168179	0.000308855	0.00731111
KLF3	1.05831	0.11912	8.3e-07	5e-05
FBXW4P1	1.05736	0.176651	0.000556931	0.0118091
SLC35G1	1.05624	0.152175	8.28e-05	0.00244045
B4GALT4	1.05545	0.12075	1.53e-06	8.43e-05
CCDC39	1.05223	0.141694	3.64e-05	0.00123243
PLVAP	1.05049	0.197731	0.00196691	0.0336682
ANO7P1	1.04736	0.167271	0.000388233	0.00879251
CYP3A5	1.04503	0.204317	0.00266284	0.0433839
AC097533.1	1.04306	0.149381	9.62e-05	0.00274129
SRSF12	1.0429	0.137291	2.93e-05	0.00101936
TGFB2-AS1	1.03881	0.197384	0.00227069	0.0381631
TACC1	1.03486	0.135648	2.18e-05	0.000792299
RP11-973N13.2	1.03407	0.185763	0.00144675	0.0263776
ASS1P7	1.03379	0.175814	0.000856061	0.0169267
ATL1	1.03373	0.125144	7.8e-06	0.000331217
CLIC2	1.0328	0.169492	0.000635508	0.0131948
MRLN	1.03089	0.373962	1.39e-22	1.85e-19
KL	1.02844	0.193334	0.00228054	0.0382521
PLEKHA7	1.02625	0.155807	0.000280117	0.00673568
FNIP2	1.02576	0.125366	1.07e-05	0.000433732
SLCO5A1	1.02497	0.291973	2.67e-10	3.88e-08
MBOAT1	1.02448	0.156228	0.000301936	0.0071739
NR2F1	1.02183	0.166521	0.000687514	0.0140914
RP1-59D14.5	1.01901	0.15704	0.000363881	0.00835958
PRR29	1.01674	0.159181	0.000440497	0.00977512
EZR	1.00566	0.141086	0.000145326	0.0038737
AHCYL2	1.0024	0.143195	0.000192859	0.00493079
AC006116.22	0.999128	0.176616	0.0018164	0.0316611
MYO6	0.998554	0.125297	2.74e-05	0.000962234
FOSL2	0.998208	0.168008	0.00121219	0.0227099
WDFY2	0.994498	0.106749	1.47e-06	8.2e-05
ADGRF5	0.993941	0.172684	0.0017052	0.0300674
PTPRB	0.993784	0.186026	0.00305956	0.0482713
SLC44A3	0.986492	0.151885	0.000543968	0.0115991
RP5-1180D12.1	0.985013	0.155773	0.000737658	0.014937
RP11-547D13.1	0.984741	0.160743	0.000999046	0.0192998
PCDHB12	0.984616	0.156269	0.0007749	0.015553
DOCK9	0.984252	0.139321	0.000192502	0.00492712
RSPH9	0.982594	0.171112	0.00186591	0.0323475
PACSIN2	0.98005	0.0750661	6.83e-11	1.12e-08
RP11-527N22.2	0.971965	0.365924	0.0014472	0.0263776
PER2	0.970733	0.123594	5.71e-05	0.00177976
PTPRE	0.969375	0.15723	0.00121262	0.0227099
CRACR2A	0.964204	0.116651	2.95e-05	0.0010245
ISG20	0.960215	0.162693	0.001918	0.0329997
MKL2	0.959497	0.131121	0.000201177	0.00510482
TGFB2	0.956546	0.167556	0.0024405	0.0402752
UNC13B	0.952354	0.0820439	1.1e-08	1.07e-06
LIMK2	0.948431	0.0773309	3.01e-09	3.41e-07
GALNT13	0.946069	0.381338	0.000227331	0.0056449
DOCK9-AS2	0.944192	0.151677	0.00143377	0.0262376
FANCE	0.943463	0.148764	0.00120941	0.0226777
PITPNC1	0.938884	0.136234	0.000547663	0.0116435
EYA2	0.935742	0.135869	0.000583271	0.012283
SLC45A4	0.934708	0.123124	0.000185073	0.00477377
RSG1	0.933463	0.139165	0.000800304	0.0160115
SDCBPP3	0.933043	0.153939	0.00209153	0.0355071
KLRG2	0.932571	0.449968	0.00298832	0.0473814
LDOC1L	0.92725	0.0886475	6.49e-07	4.06e-05
C8orf88	0.926664	0.148151	0.00170022	0.0299963
LRP8	0.923828	0.152939	0.00237863	0.0395402
PCDHGC3	0.917503	0.13587	0.00100596	0.0194216
ATP9A	0.916903	0.10183	1.92e-05	0.00071878
SREBF2	0.916353	0.0962611	9.22e-06	0.000381899
LINC01422	0.915639	0.143036	0.00163315	0.0290053
DLG3	0.915601	0.105764	3.93e-05	0.00131288
JOSD1	0.908921	0.10495	4.61e-05	0.00149425
ALDH3A2	0.901993	0.128701	0.000903929	0.0177304
CPEB2	0.901036	0.144426	0.00242963	0.0401789
EMP2	0.894476	0.144934	0.00294161	0.0468438
CPO	0.894078	0.139444	0.0021413	0.0362941
MYO5C	0.89065	0.140563	0.00232988	0.0388919
MAFF	0.887885	0.239594	0.000340757	0.0079195
COL4A3BP	0.887702	0.118295	0.000472844	0.0103278
KIAA1522	0.884951	0.126787	0.000976586	0.0189231
PPFIA2	0.882728	0.3078	0.000261635	0.00637771
JMY	0.879911	0.120084	0.000752704	0.0152031
TTC28	0.879089	0.0693579	2.37e-08	2.11e-06
URB1	0.879033	0.0981902	5.54e-05	0.00173563
KIAA1109	0.872912	0.114537	0.000612535	0.0127927
RP11-288H12.3	0.872256	0.134822	0.00275758	0.0444288
PYGB	0.869829	0.134059	0.00239089	0.0396615
SIX4	0.868853	0.127537	0.00190312	0.0327614
SDCBP	0.868631	0.115259	0.000702053	0.014325
EP300	0.866086	0.0743271	4.16e-07	2.72e-05
IMPA1	0.861581	0.106424	0.000323382	0.00759863
FCHSD2	0.856286	0.110439	0.000703925	0.0143449
SLF1	0.843017	0.124391	0.00289323	0.046241
BPGM	0.830729	0.111565	0.00149844	0.027095
TRIOBP	0.830528	0.112643	0.00175201	0.0306752
TNS1	0.814321	0.103806	0.00150433	0.027186
ST13	0.81178	0.07396	1.07e-05	0.000433812
SMG6	0.800755	0.0839147	0.000188775	0.00484967
RNF185	0.798941	0.0681277	6.39e-06	0.000281668
ERN1	0.788688	0.0857464	0.000431516	0.00961591
SERAC1	0.7738	0.0840669	0.000672702	0.013859
DUSP18	0.768148	0.0957743	0.00287756	0.0460366
TMEM233	0.758694	0.220818	0.000113844	0.00316671
TCF20	0.755857	0.0745023	0.000360339	0.00829013
PRKAA2	0.708545	0.158509	1.64e-06	8.87e-05
PITPNB	0.695996	0.0683381	0.00270587	0.0438834
NFIL3	0.686663	0.145332	0.00145208	0.0264062
DDX17	0.686585	0.0603971	0.00135394	0.0249483
CFAP161	0.654577	0.270315	9.04e-05	0.00260825
FAM19A4	0.625065	0.431522	0.000171204	0.00445928
CLCN1	0.599907	0.288068	3.65e-06	0.000177643
JPH1	0.590991	0.31472	9.72e-12	2e-09
ANGPTL7	0.538528	0.227854	5.15e-06	0.000235397
EEF1DP5	0.505701	0.537197	8.48e-06	0.000355041
CTD-2339F6.1	-0.517858	0.313268	0.00316099	0.0495775
UPK3B	-0.547625	0.273743	0.000211029	0.0053103
TREM1	-0.577694	0.243339	0.000583511	0.012283
CA10	-0.591873	0.566454	0.0023235	0.0388057
LINC00485	-0.601623	0.632399	4.77e-22	5.85e-19
RP11-752L20.3	-0.647609	0.213876	0.000276087	0.00665379
CNR1	-0.662659	0.302578	7.74e-05	0.00229898
A1BG	-0.668409	0.325203	0.000187528	0.00482929
IL21R-AS1	-0.675086	0.377508	0.00163143	0.0289955
SHISA9	-0.68903	0.485569	8.57e-05	0.00250292
FABP4	-0.703965	0.291358	0.00155778	0.0279464
ART1	-0.713032	0.340175	0.000242672	0.00597936
APOA1	-0.756456	0.325946	0.000328208	0.00768378
CREB3L4	-0.770433	0.0962267	0.00284039	0.0456019
HOXA3	-0.791734	0.600805	2.4e-13	6.91e-11
ARRB2	-0.805518	0.102137	0.00146497	0.026565
CDK5	-0.80952	0.0987916	0.000900245	0.0176799
RP1-34B20.4	-0.813059	0.318704	0.000145575	0.00387711
COX5A	-0.813476	0.104886	0.00148052	0.0268166
NPR3	-0.818014	0.349632	1.27e-08	1.21e-06
NUDT1	-0.819734	0.107785	0.00152774	0.0275313
P3H4	-0.821744	0.109238	0.00163739	0.0290644
MRPL24	-0.822804	0.0931392	0.000273296	0.00660709
NLRC4	-0.824617	0.11395	0.00220684	0.0372271
JHDM1D-AS1	-0.833287	0.0974811	0.000319674	0.00752259
ALDH1B1	-0.83482	0.101488	0.000484255	0.0105411
SRD5A3-AS1	-0.842122	0.116675	0.00162106	0.0288547
PSMA8	-0.842449	0.851686	0.00045461	0.0100118
C21orf58	-0.850149	0.129082	0.00318217	0.0498363
RP11-60A8.1	-0.857217	0.287736	0.000347293	0.00804798
IRF5	-0.85835	0.132742	0.00315459	0.0495015
LAPTM5	-0.858386	0.127982	0.0023494	0.0391767
RP11-25I15.3	-0.862192	0.38743	1.44e-07	1.05e-05
SLC43A3	-0.862206	0.108791	0.000419656	0.00940874
CSF1	-0.862332	0.126196	0.00189501	0.0326746
PYCARD	-0.863238	0.131647	0.00265106	0.0432582
STKLD1	-0.867297	0.123353	0.00134552	0.0248505
PRADC1	-0.867995	0.116881	0.000764959	0.0153922
RASSF4	-0.869966	0.124216	0.00131671	0.0244031
RP11-259N19.1	-0.875947	0.116798	0.000585119	0.0123006
IRF8	-0.878254	0.134598	0.00216553	0.0366294
CLCN2	-0.88019	0.136963	0.00261387	0.042695
IGSF6	-0.880597	0.139111	0.0027445	0.0443074
CD53	-0.883172	0.137318	0.00230043	0.0385008
DHRS11	-0.884733	0.111043	0.00024585	0.00604368
TTYH3	-0.885396	0.132146	0.00158086	0.0282651
VAV1	-0.889276	0.137505	0.00204313	0.0348336
PDLIM2	-0.890843	0.135149	0.00188589	0.0325788
BTK	-0.891783	0.139653	0.00212954	0.036114
COL4A5	-0.892775	0.139631	0.00236929	0.0394466
RP11-46A10.5	-0.893032	0.136509	0.00174068	0.0305591
HCK	-0.893206	0.130984	0.0012826	0.0237985
C19orf38	-0.894035	0.140352	0.00215921	0.036559
RP11-490M8.1	-0.894106	0.14483	0.00277521	0.0446903
RHEBL1	-0.894339	0.139178	0.00200346	0.0341937
MMP25-AS1	-0.895115	0.112899	0.000207351	0.00522599
FCRLB	-0.901037	0.133371	0.00111789	0.0212359
HMBS	-0.903643	0.1067	6.83e-05	0.00207316
CKLF	-0.904926	0.129194	0.000727325	0.0147558
NUDT17	-0.90858	0.1117	0.000109292	0.00305809
RNASE6	-0.910477	0.140313	0.00145693	0.0264341
GPX7	-0.91073	0.10673	5.15e-05	0.00163186
RP11-429E11.2	-0.911052	0.472009	0.000128578	0.00350631
SERPINH1	-0.913365	0.141404	0.00189719	0.0326769
TEAD4	-0.915553	0.143765	0.00159326	0.0284392
SPI1	-0.915716	0.153342	0.00259272	0.0424147
RASGRP4	-0.91792	0.127213	0.000432751	0.00962999
WAS	-0.918131	0.134222	0.000750468	0.0151675
GPX1	-0.918166	0.136945	0.00129579	0.0240294
RGS10	-0.920731	0.107131	3.66e-05	0.00123654
HOXA4	-0.922039	0.523943	7.06e-10	9.31e-08
AC069277.2	-0.92384	0.677645	0.00169182	0.0298645
SRD5A3	-0.927371	0.112155	6.01e-05	0.00185742
C1QC	-0.927406	0.150659	0.00171894	0.0302762
BIN2	-0.929886	0.139319	0.000840845	0.0166775
CD33	-0.930715	0.12772	0.000311792	0.00737515
ARMC12	-0.933901	0.160697	0.00273679	0.044243
TRPM2	-0.935073	0.161164	0.00275132	0.0443727
HLA-DRB1	-0.935601	0.163943	0.00319268	0.0499764
C1QB	-0.93562	0.147871	0.00125523	0.0233858
LILRB4	-0.936485	0.149524	0.00135543	0.0249498
C3AR1	-0.936545	0.151707	0.00155289	0.0278901
TMC8	-0.937859	0.12745	0.000238708	0.0058999
SSR4P1	-0.937876	0.133636	0.000419862	0.00940874
METTL24	-0.941126	0.16441	0.00274781	0.0443385
HOXB5	-0.942431	0.392256	0.000265704	0.00645225
CCDC167	-0.944452	0.12654	0.000180876	0.00468063
PARVG	-0.944618	0.134885	0.000387315	0.00878418
LILRA2	-0.945132	0.158829	0.0019783	0.0338186
RP11-848P1.3	-0.94559	0.128969	0.000224606	0.00560084
LINC01176	-0.946231	0.148483	0.00104759	0.0200555
SLC22A18AS	-0.946715	0.138055	0.000467691	0.0102433
KIF21B	-0.951208	0.159673	0.00183108	0.0318301
TLDC2	-0.951628	0.159662	0.00185083	0.032121
MAP4K1	-0.95165	0.130997	0.000226975	0.00564046
MPEG1	-0.952734	0.139409	0.000466205	0.0102178
B3GNT7	-0.954644	0.154314	0.00127746	0.0237445
ELF3	-0.954893	0.340138	1.37e-06	7.73e-05
DDIAS	-0.959156	0.170836	0.00272238	0.0440841
GABRA3	-0.960113	0.363754	0.00162757	0.0289544
AIF1	-0.961307	0.126742	0.000109142	0.00305723
CLEC4G	-0.962264	0.454806	0.000299558	0.00712801
SATB2	-0.963772	0.147248	0.000604984	0.0126599
TTC39C	-0.964056	0.170169	0.00238676	0.0396522
RP11-1275H24.3	-0.967927	0.159515	0.00126009	0.0234626
PCOLCE	-0.968069	0.167775	0.00155688	0.027946
EVI2A	-0.968869	0.153998	0.000888581	0.0174686
RP11-834C11.4	-0.96944	0.141658	0.000353606	0.00817646
YJEFN3	-0.970455	0.167619	0.0018241	0.0317609
CD300C	-0.970559	0.144781	0.000447647	0.00987204
CEL	-0.971676	0.173873	0.00246417	0.0406029
TMCC1-AS1	-0.971856	0.138081	0.000239669	0.00591907
LILRB2	-0.971956	0.148563	0.000544574	0.011601
RP11-38L15.3	-0.972503	0.179195	0.00309923	0.0487526
ZIC3	-0.972916	0.702074	7.75e-05	0.00230023
PCED1B	-0.976159	0.124273	4.87e-05	0.00156045
CORO2A	-0.976416	0.172662	0.00211488	0.0358843
RP11-295G20.2	-0.977245	0.149846	0.000524995	0.0112817
CYTH4	-0.977313	0.131039	0.000102012	0.00288281
SLC1A5	-0.980283	0.141171	0.000243176	0.00598716
PPARGC1A	-0.98095	0.183749	0.00272635	0.0441259
SGOL2	-0.981308	0.151456	0.000543468	0.0115991
AIFM3	-0.981386	0.272223	7.46e-06	0.000319084
LIMD2	-0.981545	0.145931	0.000366266	0.00840534
COL1A2	-0.986682	0.146905	0.000276028	0.00665379
RP11-8L8.2	-0.992949	0.182684	0.00239028	0.0396615
COTL1	-0.993035	0.108057	1.95e-06	0.000102835
TNS3	-0.993902	0.160302	0.000797378	0.0159641
MX2	-0.99423	0.203339	1e-05	0.000408338
FOXD4	-0.995128	0.178506	0.00196826	0.0336682
POMC	-0.995248	0.283649	0.000109854	0.00306909
GYG2	-0.995838	0.169756	0.00119139	0.0224188
ZMYND15	-0.995941	0.139011	0.000133764	0.0036199
RPP25	-0.996418	0.177258	0.00177467	0.0310353
TCHH	-0.996705	0.176679	0.00175216	0.0306752
AC005330.2	-0.998373	0.170524	0.00124044	0.0231778
OLFML2B	-0.99994	0.154094	0.000414558	0.00931602
FCER1G	-1.00026	0.124217	2.06e-05	0.000757196
RP11-733O18.1	-1.00175	0.177474	0.00164407	0.0291505
TACC3	-1.0023	0.137211	9.27e-05	0.0026559
RAC2	-1.00331	0.132367	5.36e-05	0.0016893
ABTB1	-1.00494	0.149094	0.000253175	0.0062094
LOXL3	-1.00631	0.157916	0.000511276	0.0110244
SUGCT	-1.00636	0.153341	0.000335787	0.00782107
RN7SL138P	-1.00714	0.148105	0.000225979	0.00562008
LINC01232	-1.00809	0.170563	0.000958391	0.0186498
RP11-313D6.3	-1.00995	0.14461	0.000150208	0.00398389
UNQ6494	-1.01281	0.515707	0.00011104	0.00309952
UBE2T	-1.0144	0.17886	0.00137517	0.0252425
BGN	-1.0148	0.163192	0.00052017	0.0111856
GINS2	-1.0158	0.193396	0.002498	0.0410441
CERKL	-1.0163	0.149264	0.000188154	0.00483761
OPLAH	-1.01679	0.179002	0.00134979	0.0249149
AC144449.1	-1.0189	0.184992	0.00172797	0.0304186
MFSD2B	-1.02129	0.172973	0.000876659	0.0172698
NLRP3	-1.02133	0.17295	0.00082965	0.0164861
NCF4	-1.02247	0.13497	3.74e-05	0.00125897
NCF1	-1.02276	0.163169	0.000465531	0.01021
ZDHHC11	-1.02529	0.200268	0.00286727	0.0458951
ABCC3	-1.02531	0.187596	0.00170849	0.0301088
CABP4	-1.02564	0.164887	0.000496147	0.0107413
MAP6	-1.02566	0.148078	0.000149725	0.00397768
FAM222A-AS1	-1.0257	0.358888	7.96e-06	0.000336789
ARHGAP9	-1.02576	0.125582	1.1e-05	0.000439844
POU2F2	-1.02629	0.147862	0.000129808	0.00353382
AC109829.1	-1.02635	0.196743	0.00254918	0.0417879
HLA-DMA	-1.02848	0.1324	2.63e-05	0.000929696
CD244	-1.02928	0.187513	0.00160784	0.0286673
GSG2	-1.03166	0.191876	0.00189039	0.0326126
SNHG4	-1.03393	0.187879	0.00152047	0.0274311
FOLR2	-1.03442	0.180771	0.00096987	0.0188158
RP11-791G15.2	-1.03477	0.178373	0.000906866	0.0177771
SERPINA1	-1.03622	0.168668	0.000469677	0.0102727
GPR35	-1.03819	0.168011	0.000461523	0.010143
FAM188B	-1.03863	0.18332	0.00108706	0.0206873
AEBP1	-1.04025	0.1879	0.00124003	0.0231778
PSTPIP1	-1.04077	0.156344	0.000174798	0.00454054
PDE6G	-1.04417	0.178171	0.000762959	0.0153617
EPHA1-AS1	-1.04504	0.212152	0.00307177	0.048392
BASP1	-1.04618	0.197246	0.00178113	0.0311142
C17orf96	-1.04639	0.166406	0.000342588	0.00795626
RP3-522D1.1	-1.04676	0.188243	0.00120781	0.0226609
SLC22A20	-1.04898	0.194765	0.00157147	0.0281131
RNF150	-1.05038	0.169244	0.000376287	0.00858898
PTPRO	-1.05086	0.172348	0.000444556	0.00983102
SOWAHD	-1.0519	0.189167	0.00115251	0.0218157
ASGR2	-1.05227	0.172509	0.000447428	0.00987204
CKS2	-1.0528	0.177684	0.000608321	0.0127214
LL21NC02-1C16.1	-1.05452	0.176585	0.000566729	0.011985
RP11-51F16.1	-1.05646	0.155881	0.000118244	0.00326918
TNFAIP8L2	-1.05771	0.139654	2.14e-05	0.000783189
FNDC4	-1.05808	0.196729	0.00143504	0.0262458
LRRC25	-1.0584	0.146313	4.44e-05	0.00144867
LILRB1	-1.05873	0.159996	0.000158032	0.00416029
THBS1	-1.05918	0.305003	1.38e-10	2.08e-08
PDIA5	-1.06168	0.123826	1.94e-06	0.000102058
AC004156.3	-1.06217	0.183021	0.000682365	0.0140038
TNFRSF11A	-1.06276	0.15469	9.13e-05	0.00262174
OSCAR	-1.06374	0.147949	4.59e-05	0.00148892
TRBC2	-1.06422	0.213619	0.00250193	0.0410768
MTHFD2	-1.06459	0.149072	4.94e-05	0.00157688
ADAMTS17	-1.06607	0.215478	0.00245711	0.04051
HLA-DRB5	-1.06627	0.214237	0.00231771	0.0387494
CD48	-1.06665	0.184899	0.00068184	0.0140021
VAMP5	-1.06684	0.167172	0.000215377	0.00540693
TYROBP	-1.06759	0.137825	1.56e-05	0.000595695
TREM2	-1.06923	0.172794	0.000316388	0.00746728
TRIB3	-1.07072	0.169007	0.000243849	0.0059991
CTD-2341M24.1	-1.07118	0.190678	0.000854714	0.0169232
RP11-380L11.4	-1.07161	0.194383	0.00101642	0.0195762
BOLA3	-1.07171	0.111811	1.09e-07	8.27e-06
RP11-155D18.13	-1.07704	0.212858	0.00204506	0.0348479
FANCA	-1.07943	0.169609	0.000202499	0.0051269
ADAMTS7	-1.07967	0.188338	0.000620504	0.0129338
SEMA4A	-1.08025	0.139672	1.08e-05	0.000435652
PRDX4	-1.08106	0.110921	5.56e-08	4.45e-06
KCNJ3	-1.08232	0.413909	2.97e-09	3.39e-07
KIF11	-1.08262	0.195424	0.000812103	0.016208
GNA15	-1.08289	0.133227	4.01e-06	0.000192681
CD28	-1.08371	0.228241	0.00305462	0.048217
LY86	-1.08601	0.147189	2.19e-05	0.000794614
ORC6	-1.08666	0.16634	0.000132728	0.00360408
TRBC1	-1.08793	0.227804	0.00284427	0.0456183
AC011515.2	-1.08841	0.227164	0.00286629	0.0458951
RP5-899E9.1	-1.08866	0.177965	0.000283162	0.00679865
MROH6	-1.08897	0.142447	1.11e-05	0.000443234
AC005578.3	-1.08934	0.21541	0.00188346	0.0325633
NID1	-1.09085	0.194783	0.000578864	0.0122093
SNAI2	-1.09146	0.181655	0.000346658	0.00803909
DOC2GP	-1.09162	0.231918	0.00311259	0.0489145
CRTAM	-1.09179	0.21948	0.00201725	0.0344107
FAM35DP	-1.09197	0.228349	0.00279423	0.0449513
CTD-2035E11.5	-1.0939	0.161872	7.69e-05	0.00228965
AC006946.15	-1.0946	0.210803	0.00145598	0.026432
RP11-229P13.25	-1.09513	0.215616	0.0017417	0.0305591
MYO1G	-1.09687	0.186303	0.000392114	0.00886782
PTMAP5	-1.09807	0.185291	0.000375403	0.00857492
KIAA0226L	-1.09849	0.142657	8.84e-06	0.000368063
SIGLEC1	-1.09898	0.220147	0.00186854	0.0323755
STK32B	-1.09963	0.11069	0.000653287	0.0135166
NCF1B	-1.10148	0.189196	0.000436114	0.00968458
SCUBE2	-1.10149	0.234867	0.00292542	0.0466387
PSAT1	-1.10163	0.199053	0.000688984	0.0140944
CTD-3035D6.1	-1.1022	0.196772	0.000639981	0.0132619
RENBP	-1.10237	0.134054	2.2e-06	0.000113958
NANOS3	-1.10256	0.20474	0.000931285	0.0181888
KHK	-1.10362	0.161205	5.57e-05	0.001744
MMP24	-1.10408	0.18232	0.000277655	0.00668151
CCDC170	-1.10445	0.157525	3.85e-05	0.0012929
E2F2	-1.10448	0.233051	0.00267098	0.0434876
IL15	-1.10463	0.189906	0.000432338	0.00962751
NLN	-1.10522	0.110593	1.49e-08	1.38e-06
CEBPA-AS1	-1.10551	0.182064	0.00026323	0.0064068
SLC17A9	-1.1057	0.179522	0.000214089	0.00538307
AIM1	-1.10658	0.195754	0.000554171	0.0117662
RP11-2E11.9	-1.10736	0.158248	3.96e-05	0.00131948
CTSW	-1.10884	0.200471	0.000695884	0.0142173
FPR3	-1.10947	0.165741	7.04e-05	0.00213091
ADM5	-1.11051	0.222921	0.00175532	0.0307137
RHBDL1	-1.11186	0.208317	0.000946715	0.0184451
TMEM71	-1.1121	0.189234	0.000361818	0.00831816
SLC37A2	-1.11212	0.155394	2.43e-05	0.000866588
PCED1B-AS1	-1.11321	0.136865	2.33e-06	0.000120016
MS4A14	-1.11414	0.179131	0.000180072	0.00466361
CCNA2	-1.11544	0.20731	0.000857799	0.016938
CLECL1	-1.11623	0.194244	0.000442199	0.00979248
MYO10	-1.11737	0.168141	7.71e-05	0.00229525
RP11-156K13.3	-1.11877	0.232094	0.00221697	0.0373783
CH17-340M24.3	-1.11976	0.116795	3.43e-08	2.91e-06
SLC29A4	-1.12053	0.22569	0.00165653	0.0293389
SLAMF8	-1.12061	0.179194	0.000158639	0.00417283
MFI2-AS1	-1.12093	0.186026	0.00023488	0.00580977
HLA-DQB1	-1.12185	0.223964	0.00144088	0.0263142
C1orf229	-1.12264	0.17879	0.000143529	0.00383862
SPC24	-1.12277	0.20939	0.000823401	0.0163721
VENTX	-1.12323	0.179713	0.000143364	0.00383741
SIGLEC7	-1.12421	0.156244	1.99e-05	0.000736464
ITGAX	-1.12512	0.17865	0.000131964	0.00358639
IGFBP2	-1.12583	0.186514	0.000182745	0.00472519
SLC7A5	-1.12616	0.216	0.00102744	0.0197266
WNT5A	-1.12634	0.205157	0.000637413	0.0132258
RGL3	-1.12674	0.220747	0.0012516	0.0233454
SDS	-1.12732	0.275905	3.84e-06	0.000184776
OGDHL	-1.12738	0.210748	0.000858225	0.016938
HS3ST1	-1.12807	0.2044	0.00060376	0.0126425
RP11-174G17.3	-1.13016	0.240726	0.00227587	0.03823
SNORA51	-1.13039	0.23272	0.00193847	0.0332482
FHOD3	-1.13144	0.330252	3.94e-08	3.3e-06
NCAPG	-1.13149	0.24517	0.00267706	0.043549
BCL2A1	-1.13218	0.230813	0.00165502	0.0293285
PKIB	-1.13411	0.191891	0.000274837	0.00663369
GAS2L3	-1.13412	0.177676	0.000104956	0.00295551
ALDH1A2	-1.13521	0.392988	9.3e-05	0.00266392
RNFT2	-1.13589	0.201017	0.000411721	0.00927184
EVA1A	-1.13618	0.289925	0.000877914	0.0172839
TRPC2	-1.13697	0.174707	7.67e-05	0.00228569
CTB-52I2.4	-1.13735	0.229535	0.00155014	0.0278563
C5	-1.13868	0.194894	0.000274525	0.00663117
LINC00323	-1.14046	0.21157	0.000687286	0.0140914
CACNA1G-AS1	-1.14197	0.245144	0.00238785	0.0396522
MELK	-1.14325	0.23158	0.00145079	0.0264062
CTB-147N14.6	-1.14345	0.224805	0.0011737	0.0221381
FCGR3A	-1.14418	0.190529	0.000190426	0.00488425
SLC1A3	-1.14485	0.180497	9.34e-05	0.00267026
LA16c-325D7.2	-1.14651	0.188086	0.000173423	0.00451338
TMEM119	-1.14669	0.221962	0.000929629	0.0181676
LILRB3	-1.14712	0.177639	7.95e-05	0.00235371
SYT15	-1.14714	0.157149	1.07e-05	0.000433635
SPRN	-1.14721	0.147962	3.5e-06	0.000171191
SFRP2	-1.14747	0.257359	0.00302909	0.0479088
RPS7P1	-1.14829	0.228381	0.00120586	0.0226377
MAMDC2	-1.14867	0.201585	0.00035772	0.0082477
RP11-474P2.4	-1.14904	0.254985	0.00285554	0.0457761
PIM1	-1.15023	0.21544	0.000666545	0.0137499
RP5-1171I10.5	-1.15148	0.189309	0.000163444	0.00428862
HMGB1P1	-1.15226	0.23106	0.00127995	0.0237632
IL2RG	-1.15726	0.169946	3.1e-05	0.00107153
FTH1P15	-1.15745	0.22193	0.000819944	0.0163441
RP11-442O1.4	-1.1578	0.235035	0.00125389	0.0233745
NUSAP1	-1.15784	0.220514	0.000719151	0.0146272
CPXM1	-1.15871	0.251601	0.00215782	0.0365547
NCF1C	-1.16078	0.166142	1.96e-05	0.000729987
MMP11	-1.16079	0.207735	0.000394753	0.0089149
KCNAB2	-1.16088	0.134404	0.00217289	0.0367127
RP11-180I4.4	-1.16097	0.263403	0.00309179	0.0486595
DPYSL4	-1.16119	0.235939	0.00124481	0.0232458
DHRS2	-1.16585	0.350722	8.3e-09	8.47e-07
DLEU7	-1.16806	0.20626	0.000324989	0.00762518
DKKL1	-1.17015	0.226415	0.000822	0.0163647
DAAM2	-1.17103	0.21593	0.000491631	0.0106798
FCGR2C	-1.1731	0.193337	0.00012841	0.00350472
GATM	-1.17383	0.178597	4.39e-05	0.00143597
LINC01146	-1.17428	0.258663	0.00237127	0.039459
RPL21P75	-1.1747	0.214352	0.000408355	0.00920255
ERAS	-1.17612	0.220195	0.000593049	0.0124351
STMND1	-1.17696	0.434588	0.00141292	0.0259006
CXorf65	-1.17742	0.260608	0.00228078	0.0382521
TREX2	-1.1786	0.198226	0.000165619	0.00434142
RP11-1094M14.8	-1.17913	0.248845	0.00166777	0.0295215
RP11-493L12.4	-1.18045	0.204614	0.000256361	0.00627308
RP1-278O22.2	-1.18071	0.265145	0.00267193	0.0434876
GTSE1	-1.18112	0.220363	0.000518059	0.0111552
LST1	-1.18175	0.156353	3.67e-06	0.000178123
RP11-185E8.2	-1.18282	0.250267	0.00161752	0.0288078
FEZ1	-1.18428	0.173587	2.04e-05	0.000751113
CTD-2292P10.4	-1.18451	0.200303	0.000167615	0.00438366
PTTG1	-1.18521	0.20368	0.000193944	0.00495456
RP11-946L16.2	-1.18524	0.269688	0.00279399	0.0449513
RP4-580N22.2	-1.1875	0.20468	0.00021783	0.00545995
RP11-458K10.1	-1.19012	0.744723	0.000943669	0.0183969
HLA-DQA1	-1.19062	0.227184	0.000584164	0.0122886
CTD-3116E22.8	-1.19091	0.245136	0.00117022	0.0220854
CDT1	-1.19102	0.232528	0.0007331	0.0148541
XCL2	-1.19331	0.248009	0.00127095	0.0236373
GRID1	-1.19433	0.27785	0.00293735	0.0468055
AC147651.4	-1.19672	0.163618	5.73e-06	0.000258949
HK3	-1.19915	0.181111	2.9e-05	0.0010119
TRIM50	-1.20052	0.262419	0.00187214	0.0324203
RPL13AP5	-1.20082	0.228306	0.000531341	0.0113875
TMEM150B	-1.20088	0.182058	3.12e-05	0.00107781
VTN	-1.20139	0.2508	0.00114569	0.0217124
NKG7	-1.20514	0.196885	8.85e-05	0.00256205
C16orf59	-1.20566	0.222703	0.000385994	0.00876192
KIAA1324L	-1.20575	0.203178	0.000120031	0.00331283
LURAP1L	-1.20626	0.204167	0.000139268	0.00374347
DUSP5P1	-1.20681	0.256236	0.00143794	0.0262838
CDK1	-1.20682	0.222857	0.000354546	0.00819228
SMOC2	-1.20851	0.224447	0.000493636	0.010716
RP4-647J21.1	-1.20944	0.222457	0.000358902	0.008269
CRYBB1	-1.21058	0.150819	6.76e-07	4.21e-05
LINC00671	-1.21068	0.279167	0.00260662	0.0426202
CTLA4	-1.21099	0.278738	0.00249866	0.0410441
A1BG-AS1	-1.21135	0.200174	9.76e-05	0.00276694
OXCT2	-1.21224	0.280603	0.00255205	0.0418136
LINC01503	-1.21275	0.15332	8.74e-07	5.24e-05
PSRC1	-1.21317	0.164186	4.05e-06	0.000194178
TVP23A	-1.21383	0.196354	7.02e-05	0.00212642
SPAG5	-1.21767	0.176931	1.22e-05	0.000477926
TEX41	-1.21855	0.266882	0.00166923	0.029531
PDGFRA	-1.2201	0.288836	0.00282615	0.0453961
PAQR4	-1.22084	0.189608	3.68e-05	0.00124181
RP1-45C12.1	-1.22407	0.284219	0.00248303	0.0408294
RYR3	-1.22444	0.264061	0.000167412	0.00438195
AC053503.4	-1.22557	0.273736	0.00196845	0.0336682
PTGDR2	-1.22586	0.307512	0.00299005	0.0473853
B3GNT4	-1.22655	0.230189	0.000403777	0.00911224
FAP	-1.22698	0.305151	8.99e-05	0.00260016
PYCR1	-1.22738	0.150802	3.76e-07	2.48e-05
RP11-374F3.5	-1.22905	0.252258	0.00101212	0.019517
RP11-3P17.5	-1.23003	0.284737	0.00231925	0.038755
EDNRA	-1.23127	0.208258	0.000109365	0.00305809
SEMA6D	-1.23265	0.228011	0.000284992	0.00683745
KIFC1	-1.23379	0.237122	0.000463716	0.0101772
ACAA2	-1.23462	0.169315	3.73e-06	0.00018033
YES1P1	-1.23661	0.255533	0.00078296	0.0157049
HIST1H1C	-1.2367	0.247656	0.000673592	0.0138683
LINC01356	-1.23772	0.192469	3.3e-05	0.00112823
KCNAB3	-1.23822	0.192468	3.22e-05	0.00110426
ACRV1	-1.2391	0.204306	7.65e-05	0.00228213
RPS3AP53	-1.2413	0.27735	0.0018268	0.0317729
CFH	-1.24144	0.25106	0.00041641	0.00934451
CDKN3	-1.24332	0.204646	7.05e-05	0.00213182
TMEM249	-1.24346	0.301402	0.00305177	0.0481959
CCER2	-1.24439	0.244375	0.000511294	0.0110244
CDCA5	-1.2446	0.191577	2.61e-05	0.000926768
SMPD5	-1.24468	0.305648	0.00317799	0.0497953
CCDC151	-1.24571	0.181062	9.4e-06	0.00038572
MT1F	-1.24753	0.286645	0.00199409	0.034052
ZNF695	-1.25108	0.259886	0.000940383	0.0183553
CGNL1	-1.2512	0.208405	6.77e-05	0.0020593
GPR143	-1.25133	0.307574	0.00310295	0.048787
RP11-443B7.3	-1.25159	0.218909	0.000161218	0.00423369
AC012668.2	-1.25207	0.355104	3.42e-07	2.28e-05
RPL37P6	-1.2533	0.236652	0.000334537	0.00781475
RP11-133K1.12	-1.25451	0.203297	5.42e-05	0.0017055
ELN	-1.2558	0.242262	0.000413789	0.00930531
LINC01094	-1.2566	0.168855	1.85e-06	9.81e-05
COL6A3	-1.25831	0.209212	8.5e-05	0.00248445
NT5M	-1.25886	0.154867	2.36e-07	1.64e-05
CD300LF	-1.259	0.197805	3.07e-05	0.00106474
CD3D	-1.26107	0.230017	0.000215078	0.00540368
POLQ	-1.26163	0.200388	3.54e-05	0.00120462
MIR3142HG	-1.26205	0.226184	0.000186724	0.00481249
AC006538.1	-1.26222	0.177528	4.26e-06	0.000201014
SLC5A2	-1.26435	0.288924	0.00179627	0.0313616
FLRT2	-1.26446	0.188193	1.17e-05	0.000462084
RPS15AP17	-1.26655	0.263937	0.000807953	0.0161454
TCTEX1D1	-1.26704	0.224565	0.000153055	0.00405602
FOXD3	-1.26809	0.636928	0.000836847	0.0166085
ZNF541	-1.27107	0.251467	0.000498081	0.0107686
TLCD1	-1.2713	0.169218	1.26e-06	7.19e-05
COL7A1	-1.27225	0.24826	0.000382589	0.00870791
FOXM1	-1.27277	0.22483	0.000135255	0.00365098
ITGB2-AS1	-1.27376	0.189892	1.09e-05	0.000437262
FMO2	-1.2741	0.31432	0.00255523	0.0418441
SPC25	-1.27432	0.253963	0.000517801	0.0111552
HOXA-AS2	-1.27603	0.381942	1.31e-14	4.98e-12
INTS4P1	-1.27842	0.29498	0.00177665	0.031053
AP000439.1	-1.27846	0.240726	0.000285779	0.00684606
FCGR1A	-1.27891	0.180117	3.65e-06	0.000177643
IDI2-AS1	-1.27968	0.227182	0.000139408	0.00374407
LSP1	-1.27987	0.220077	9.07e-05	0.0026123
RP11-338N10.1	-1.28002	0.281049	0.00126909	0.0236165
AURKA	-1.28029	0.194898	1.47e-05	0.000565312
ALDH1L1-AS2	-1.28102	0.315788	0.00269738	0.0438248
C2orf48	-1.28369	0.289872	0.00156274	0.0280196
SLC1A6	-1.28652	0.640213	3.22e-05	0.00110426
CUBN	-1.28801	0.228845	0.000122931	0.00337248
AZU1	-1.28898	0.259943	0.000498749	0.0107757
MESTP3	-1.28988	0.230039	0.000138392	0.00372845
RP11-832N8.1	-1.29027	0.243774	0.000257927	0.00630176
RP11-362F19.1	-1.29049	0.260958	0.000532346	0.0113965
RP11-764K9.1	-1.2912	0.254454	0.000461851	0.0101433
ESCO2	-1.29269	0.241486	0.000225958	0.00562008
EIF4EBP1	-1.29401	0.125256	5.69e-11	9.51e-09
RP11-90P13.1	-1.29522	0.293898	0.00144125	0.0263142
RPS19P3	-1.29532	0.266405	0.000592446	0.0124351
RP11-153M7.3	-1.29612	0.246838	0.000272692	0.00660673
CTC-251I16.1	-1.29625	0.180432	2.44e-06	0.000124976
RP11-513G11.4	-1.29722	0.314235	0.00229417	0.0384163
FCGR1B	-1.29833	0.181865	2.71e-06	0.000137011
SNX22	-1.2989	0.213454	4.12e-05	0.00136202
KIF2C	-1.30226	0.188209	4.77e-06	0.000219695
RND3	-1.30226	0.1688	7.65e-07	4.67e-05
STAT4	-1.30239	0.229874	0.000106779	0.00300134
CTD-2619J13.8	-1.30284	0.232562	0.000118167	0.00326918
PLAU	-1.3078	0.176154	1.05e-06	6.19e-05
KRT6B	-1.30944	0.695059	0.00135931	0.025004
ABC7-42404400C24.1	-1.30999	0.193111	6.17e-06	0.000273842
C10orf90	-1.31001	0.254849	0.00031812	0.00749706
KCNN4	-1.31012	0.208268	2.25e-05	0.000811518
WDR62	-1.31081	0.226903	7.73e-05	0.00229832
RP11-452C13.1	-1.31081	0.225331	8.17e-05	0.00241001
RP11-1149M10.2	-1.31142	0.271969	0.000620093	0.0129337
AC007040.11	-1.31156	0.311637	0.00136224	0.0250433
HOXB3	-1.31167	0.294	8.83e-14	2.88e-11
RP11-25K19.1	-1.31216	0.253796	0.000276428	0.00665699
CYP27C1	-1.31429	0.210079	2.39e-05	0.00085647
GZMA	-1.31465	0.227188	7.09e-05	0.002143
COL5A3	-1.31477	0.205337	1.44e-05	0.000553544
RP11-82L18.2	-1.31534	0.193246	6e-06	0.000268905
CDCA8	-1.31844	0.192052	4.7e-06	0.000217425
MYBPHL	-1.31873	0.247364	0.000202777	0.0051269
RP4-635E18.6	-1.31887	0.303784	0.00151896	0.0274195
XCL1	-1.31972	0.249317	0.000208469	0.00525002
RHEBP2	-1.32021	0.213	2.81e-05	0.000983581
ADAP1	-1.32337	0.223551	4.99e-05	0.0015908
E2F7	-1.32516	0.235225	0.000100828	0.00285439
RP11-177J6.1	-1.32544	0.222297	5.01e-05	0.00159391
SKA1	-1.32588	0.23258	8.64e-05	0.00251741
CLEC10A	-1.32676	0.2353	9.44e-05	0.00269702
RP11-43F13.3	-1.32718	0.294084	0.000953197	0.01856
BOLA3-AS1	-1.32775	0.154053	1.77e-08	1.62e-06
CD22	-1.33056	0.247894	0.000169609	0.00442494
PGA5	-1.33073	0.323213	0.00229327	0.0384163
NPAS3	-1.33177	0.234502	8.29e-05	0.00244045
LRRC10B	-1.33212	0.341193	0.00273474	0.0442393
ANXA2R	-1.33257	0.162596	6.98e-08	5.49e-06
PLPP4	-1.33346	0.299606	0.00106017	0.0202358
PVT1	-1.33352	0.161545	5.6e-08	4.47e-06
BUB1	-1.334	0.210179	1.56e-05	0.000593623
RP11-149I23.3	-1.33539	0.268996	0.000387767	0.00878818
SHCBP1	-1.33565	0.181503	9.42e-07	5.57e-05
CTD-2510F5.4	-1.33776	0.230708	6.58e-05	0.00200958
CCL26	-1.33807	0.242003	0.000114101	0.00317109
ADAM11	-1.33825	0.204399	0.00182412	0.0317609
PIF1	-1.341	0.213666	1.8e-05	0.000678125
RP3-510D11.4	-1.34362	0.222542	3.29e-05	0.00112823
RP5-899B16.1	-1.34751	0.290973	0.000675598	0.0138828
PIPOX	-1.34769	0.160571	2.98e-08	2.58e-06
CASC10	-1.34799	0.137095	1.37e-10	2.07e-08
CATSPER1	-1.35065	0.20651	7.96e-06	0.000336789
CKAP2L	-1.35138	0.256488	0.000184388	0.0047638
RNY3P16	-1.35244	0.228945	3.95e-05	0.00131618
SLAMF7	-1.35281	0.208542	9.25e-06	0.000382497
RP11-115L11.1	-1.35377	0.206068	7.21e-06	0.000310488
LILRA6	-1.35413	0.201183	4.73e-06	0.0002182
RNU4-62P	-1.35671	0.23951	7.13e-05	0.00215198
TMIGD3	-1.35688	0.176126	2.56e-07	1.76e-05
ANKRD22	-1.35694	0.250822	0.000122623	0.00337248
GZMK	-1.35705	0.266887	0.000263102	0.0064068
RP11-483L5.1	-1.36006	0.262544	0.000206048	0.00519725
TPTE2P3	-1.36013	0.223179	2.55e-05	0.000909051
SOCS5P2	-1.36062	0.406309	0.00188639	0.0325788
EIF1P6	-1.36729	0.260861	0.000184763	0.00476962
LHB	-1.3681	0.357657	0.00260965	0.042648
PLP1	-1.37016	0.305202	0.000335507	0.00782026
RP11-408P14.1	-1.37316	0.164293	0.00295528	0.0469741
PF4V1	-1.37318	0.500561	0.000171032	0.00445843
MGARP	-1.37342	0.299401	0.00066361	0.013707
EME1	-1.37627	0.178657	2.11e-07	1.48e-05
OASL	-1.37761	0.198087	1.99e-06	0.000104501
TCAM1P	-1.37786	0.331625	0.00154601	0.0277977
RECQL4	-1.38001	0.189044	6.82e-07	4.24e-05
F7	-1.38087	0.278501	0.000297735	0.0071058
RP11-205K6.3	-1.38186	0.35235	0.00317341	0.0497479
ADAMTS9-AS1	-1.38424	0.367312	0.00273773	0.044243
IGHV3-73	-1.38651	0.359871	0.00245726	0.04051
CSTA	-1.38975	0.185292	3.24e-07	2.18e-05
CTD-2515H24.2	-1.391	0.267909	0.000179649	0.00465644
RP11-439A17.9	-1.39203	0.269268	0.000204316	0.00515766
SLC4A11	-1.39314	0.242898	4.65e-05	0.00150279
AP002954.4	-1.39362	0.283308	0.000350648	0.00811394
TUBB8	-1.39366	0.312577	0.000968671	0.018804
COL5A1	-1.39591	0.190746	5.35e-07	3.42e-05
RP11-62H7.2	-1.39831	0.37337	0.00272069	0.044079
OPRL1	-1.39854	0.152579	8.5e-10	1.11e-07
RP11-489D6.2	-1.39868	0.529228	1.19e-05	0.000470379
RP11-277P12.10	-1.39882	0.386763	7e-07	4.31e-05
RGS7	-1.40046	0.402433	5.54e-07	3.52e-05
RP11-9N12.2	-1.40205	0.290241	0.000355382	0.00820565
RP11-153M7.1	-1.40423	0.223436	1.12e-05	0.000447597
PLAC9	-1.40545	0.256221	7.42e-05	0.00223238
SFRP4	-1.40648	0.327636	0.00098905	0.0191298
HOTAIRM1	-1.4067	0.180579	1.11e-07	8.37e-06
RP5-1142J19.1	-1.40692	0.342163	0.0016759	0.0296162
RP3-369A17.4	-1.40718	0.283625	0.000300278	0.00713983
RP11-803D5.1	-1.40848	0.328048	0.00105792	0.020217
TK1	-1.40946	0.233501	1.93e-05	0.000721999
TSPAN7	-1.41117	0.203711	1.66e-06	8.96e-05
CTD-2078B5.2	-1.41234	0.274401	0.000165728	0.00434142
RP11-428G5.5	-1.4135	0.368943	0.00286434	0.0458941
SNCG	-1.41505	0.245182	0.00303818	0.0480051
RP4-758J18.7	-1.41674	0.345248	0.00145155	0.0264062
MESTP1	-1.41809	0.216004	4.42e-06	0.000207182
ADAMTS12	-1.41919	0.269043	0.000118177	0.00326918
RP11-284F21.10	-1.41979	0.369161	0.00206974	0.035212
TPX2	-1.42043	0.22717	9.19e-06	0.000381046
RP11-483P21.2	-1.42285	0.19243	3.33e-07	2.23e-05
FMO1	-1.42362	0.246366	3.13e-05	0.00107895
HOXB-AS1	-1.42378	0.247683	3.78e-05	0.00127061
GAP43	-1.42699	0.26305	7.55e-05	0.00225995
STEAP1B	-1.42747	0.341979	0.00116517	0.0220032
BUB1B	-1.42756	0.237613	1.82e-05	0.000684677
KLF14	-1.42833	0.365513	0.00184878	0.0321028
MKI67	-1.43007	0.251425	4.08e-05	0.00135334
RP11-388C12.1	-1.43037	0.275856	0.000133591	0.00361982
DOK2	-1.43132	0.171486	1.16e-08	1.11e-06
RP13-884E18.2	-1.43307	0.314421	0.000564231	0.0119401
TYRP1	-1.43321	0.633404	0.000435508	0.00967786
RP11-666A20.3	-1.43345	0.399158	0.00266272	0.0433839
SFRP5	-1.43422	0.393792	6.51e-07	4.06e-05
HOXB6	-1.43494	0.320402	2.01e-05	0.000741922
GLIS3	-1.43522	0.240258	1.9e-05	0.000712706
RP5-826L7.1	-1.43539	0.26414	8.25e-05	0.00243341
RUNX3	-1.4374	0.191487	1.97e-07	1.39e-05
KLHL29	-1.43913	0.174533	1.52e-08	1.41e-06
ADAMTS8	-1.4393	0.29043	0.000219557	0.0054903
TOP2A	-1.4399	0.259175	4.93e-05	0.00157553
INHBA	-1.44033	0.234177	0.00284352	0.0456183
UBE2QL1	-1.443	0.223066	4.44e-06	0.000207427
CYP27B1	-1.44448	0.247001	2.48e-05	0.000885809
CRYAB	-1.44469	0.179344	0.000771706	0.0155084
LINC01410	-1.44584	0.167421	3.65e-09	4.06e-07
CTHRC1	-1.4465	0.234507	9.64e-06	0.00039465
RP11-83N9.6	-1.44666	0.211379	1.25e-06	7.16e-05
MEX3A	-1.44731	0.231604	8.08e-06	0.000340245
SUCNR1	-1.4491	0.238894	1.34e-05	0.000520299
CTD-2357A8.3	-1.45417	0.378434	0.00218574	0.0368907
AC109826.1	-1.45531	0.158463	3.27e-10	4.63e-08
MCM10	-1.45556	0.252696	2.89e-05	0.00100722
CYP4F35P	-1.45795	0.387917	0.00208673	0.0354633
NEURL3	-1.46151	0.268015	6.44e-05	0.00197538
CTD-2655K5.1	-1.46216	0.292194	0.000217525	0.00545659
RP11-211G23.2	-1.46325	0.351252	0.00032308	0.00759714
RP11-839D17.3	-1.46449	0.230058	5.17e-06	0.000236033
KIF18B	-1.46758	0.24464	1.4e-05	0.00053869
SPATA9	-1.46863	0.213089	1.07e-06	6.26e-05
RP4-794I6.4	-1.46888	0.307848	0.000293391	0.00701788
LINC00184	-1.46953	0.267269	6.17e-05	0.00189928
GAPDHP14	-1.46964	0.32869	0.000564215	0.0119401
KIF20A	-1.47063	0.245978	1.44e-05	0.000555609
ST18	-1.47288	0.284677	2.63e-06	0.000133971
PLK1	-1.47381	0.198787	1.82e-07	1.3e-05
NUF2	-1.47531	0.199279	1.89e-07	1.34e-05
RP11-353N4.5	-1.47676	0.264008	4.16e-05	0.0013736
DIRAS1	-1.47695	0.231737	0.00174131	0.0305591
RP11-440I14.2	-1.4776	0.402498	0.00270084	0.0438464
DAB1	-1.47801	0.269576	5.04e-05	0.00160407
RP11-351I21.11	-1.47803	0.329244	0.000546073	0.0116252
CCDC144CP	-1.47895	0.344195	0.000762507	0.0153617
SPP1	-1.48062	0.278097	5.7e-05	0.0017797
PCAT6	-1.48173	0.168174	9.76e-10	1.25e-07
RP11-401P9.5	-1.48277	0.326753	0.000441694	0.00978808
ECHDC3	-1.48595	0.243528	9.26e-06	0.000382645
RPL21P119	-1.4869	0.276842	6.56e-05	0.00200789
CTD-3051D23.1	-1.48846	0.233631	4.93e-06	0.000225851
LMO7-AS1	-1.49046	0.359194	0.000941721	0.0183702
RP5-963E22.6	-1.49056	0.255534	2.32e-05	0.000835252
SRMS	-1.49081	0.352764	0.00080075	0.0160115
ARL4C	-1.49225	0.217349	9.13e-07	5.43e-05
IRS1	-1.49271	0.158039	8.21e-11	1.32e-08
MFSD4	-1.49318	0.195601	0.000335326	0.00782026
RP11-435I10.3	-1.496	0.381083	0.00174805	0.0306537
AP006285.2	-1.4961	0.378242	0.00140747	0.0258155
TRIP13	-1.4968	0.189414	2.67e-08	2.32e-06
KCNT2	-1.49725	0.260117	2.18e-05	0.000792733
AP000568.2	-1.49773	0.396228	0.0015076	0.0272298
RP11-323P17.2	-1.49778	0.241062	6.13e-06	0.00027348
VN1R48P	-1.49794	0.421487	0.00294561	0.0468438
GPR68	-1.49809	0.214461	6.17e-07	3.87e-05
LOXHD1	-1.4981	0.383064	0.00153202	0.0275928
HJURP	-1.4984	0.251174	1.25e-05	0.000487899
LINC00607	-1.50021	0.199629	1.01e-07	7.76e-06
LINC01158	-1.50313	0.36522	0.000922796	0.0180451
FNDC5	-1.50388	0.189053	0.000169531	0.00442494
KIF14	-1.50455	0.237937	4.39e-06	0.000206247
RP5-1031D4.3	-1.50759	0.226658	1.61e-06	8.75e-05
GAPLINC	-1.50995	0.302957	0.000133648	0.00361982
JAZF1-AS1	-1.51096	0.215534	0.00149157	0.0270013
RP11-472N13.3	-1.51291	0.196346	4.44e-08	3.66e-06
GMPSP1	-1.51541	0.277529	4.73e-05	0.00152327
LINC00304	-1.51632	0.298766	0.000112306	0.00312939
EBF3	-1.5172	0.244982	5.69e-06	0.000257702
C10orf55	-1.51729	0.24579	6.8e-06	0.000297534
LINC01529	-1.51822	0.376834	0.0011607	0.0219576
RNU1-106P	-1.52082	0.241143	4.75e-06	0.000218936
RRM2	-1.52413	0.256423	1.23e-05	0.000481513
SMIM18	-1.52465	0.689282	0.000822871	0.0163718
EXO1	-1.52725	0.248529	6.22e-06	0.000275031
GPD1	-1.5294	0.228114	1.13e-11	2.29e-09
PPFIA4	-1.53341	0.283278	4.32e-05	0.00141948
RP13-297E16.4	-1.53476	0.284151	5.27e-05	0.00166233
TAS1R1	-1.53591	0.304259	0.000123408	0.00338266
PRR11	-1.53684	0.179336	1.34e-09	1.62e-07
SCG2	-1.53714	0.351057	3.28e-12	7.64e-10
CCNB2	-1.54341	0.226477	6.84e-07	4.24e-05
RP11-20G13.4	-1.54379	0.269018	2.18e-05	0.000792433
CDC20	-1.54425	0.215852	2.28e-07	1.6e-05
CEP55	-1.54879	0.230374	9.01e-07	5.37e-05
RP11-834C11.7	-1.5504	0.22269	4.37e-07	2.84e-05
CD180	-1.55056	0.184608	2.24e-09	2.6e-07
PLEK2	-1.55121	0.205109	5.2e-08	4.21e-06
COL6A4P1	-1.55135	0.291975	5.16e-05	0.00163311
CTD-2033D15.2	-1.55189	0.393522	5.12e-12	1.12e-09
PCP2	-1.55499	0.264378	1.21e-05	0.000475151
LKAAEAR1	-1.5574	0.446471	0.0025252	0.0414374
SDC1	-1.55853	0.179375	1.17e-05	0.000462084
ARTN	-1.55903	0.308226	9.46e-05	0.00269983
RP1-80N2.4	-1.55954	0.40954	0.00145048	0.0264062
PODNL1	-1.55981	0.247549	3.06e-06	0.000151387
UCN	-1.56194	0.208743	6.24e-08	4.94e-06
FGF22	-1.56235	0.305797	8.46e-05	0.00247755
RP11-1055B8.3	-1.56279	0.248331	0.000196548	0.00501707
AIM2	-1.56486	0.243132	2e-06	0.000104662
RP11-886D15.1	-1.5668	0.351917	0.000349272	0.00808796
CENPF	-1.56967	0.227026	3.82e-07	2.51e-05
RLTPR	-1.57193	0.209507	5.27e-08	4.25e-06
DLGAP5	-1.57239	0.26522	8.61e-06	0.000359282
WNT4	-1.57266	0.321415	0.000129555	0.00352992
RP11-150O12.6	-1.5745	0.313736	0.000104772	0.00295294
SLC45A3	-1.5766	0.209043	4.43e-08	3.66e-06
GPT2	-1.57837	0.140015	0.00222111	0.0374085
CLDN6	-1.57949	0.359539	0.000461334	0.010143
HSPB9	-1.57953	0.20647	3.22e-08	2.75e-06
ITGA8	-1.5809	0.289509	0.000773464	0.015534
OLFM2	-1.58272	0.228874	3.48e-07	2.32e-05
HOXA1	-1.5832	0.269627	1e-05	0.000409279
RP11-513O13.1	-1.58382	0.247158	2.1e-06	0.000108841
KIF4A	-1.58661	0.245539	1.58e-06	8.65e-05
RP11-236B18.5	-1.58719	0.304363	6.29e-05	0.00193177
GPR62	-1.59051	0.316812	9.1e-05	0.0026168
S100A4	-1.5945	0.161157	4.24e-06	0.000200943
CYP4F29P	-1.5955	0.359284	0.000326966	0.00766593
LA16c-352F7.1	-1.59672	0.455577	0.00158692	0.0283418
LINC00452	-1.59689	0.358427	0.000285684	0.00684606
CTD-3032H12.2	-1.60014	0.367384	0.000369531	0.00845895
RTN1	-1.60035	0.217695	0.00291565	0.0465295
RP11-785D18.3	-1.60051	0.374094	0.000675071	0.0138809
EYA4	-1.6023	0.364443	4.67e-12	1.03e-09
COL3A1	-1.60518	0.198678	4.38e-09	4.79e-07
E2F8	-1.60527	0.288411	2e-05	0.000739034
RCOR2	-1.61012	0.319478	7.48e-05	0.00224603
LINC00152	-1.61025	0.183522	2.42e-10	3.53e-08
AC079753.4	-1.61446	0.427865	0.00209124	0.0355071
RBP3	-1.61632	0.397018	0.000830762	0.016498
RTP1	-1.6195	0.39663	0.000688769	0.0140944
FAM64A	-1.62219	0.249729	1.12e-06	6.48e-05
RP11-227D13.4	-1.62571	0.395359	0.000920131	0.018015
AC004257.1	-1.62759	0.304007	3.98e-05	0.00132211
FEV	-1.62804	0.518845	3.8e-10	5.23e-08
CD300E	-1.63003	0.249558	0.000336115	0.00782301
CCL13	-1.63017	0.459748	0.000140682	0.00377197
RPL29P19	-1.63148	0.232888	1.83e-07	1.3e-05
PDE1C	-1.63301	0.291278	1.49e-05	0.000571789
CCL20	-1.63399	0.325705	0.00253174	0.0415234
FCGR2B	-1.63668	0.18942	3.24e-10	4.6e-08
IGFL4	-1.63719	0.247662	0.000273321	0.00660709
EXTL1	-1.63883	0.267518	0.00156596	0.0280458
C19orf84	-1.64063	0.256944	1.49e-06	8.3e-05
ZYG11A	-1.64253	0.353637	0.0023679	0.039444
IL4I1	-1.64346	0.22817	8.67e-08	6.7e-06
AC018890.6	-1.64512	0.305566	2.75e-06	0.000138419
RP11-83B20.7	-1.64674	0.413409	0.000786357	0.0157632
LINC00544	-1.6474	0.407983	0.000580873	0.0122436
ADAMTS16	-1.64869	0.30625	2.59e-05	0.000918714
HOXB7	-1.64896	0.223795	3.71e-11	6.65e-09
ASIC1	-1.65045	0.193752	0.00294481	0.0468438
CH17-13I23.3	-1.65394	0.317016	3.66e-05	0.00123529
RN7SL180P	-1.66062	0.407438	0.000548842	0.0116608
RP11-19E11.1	-1.66167	0.42025	0.000712103	0.014493
CDC25C	-1.66224	0.268719	2.33e-06	0.000120124
LINC01272	-1.66308	0.22535	3.58e-08	3.03e-06
FCGBP	-1.66483	0.234509	1.02e-07	7.8e-06
LINC00940	-1.6661	0.444555	0.00156405	0.0280274
SRCIN1	-1.66691	0.262688	0.00053843	0.0115008
RP11-132A1.4	-1.66907	0.280799	4.27e-06	0.000201014
RASD1	-1.66946	0.300193	1.39e-05	0.00053869
VSTM2L	-1.66998	0.297442	0.0029146	0.0465295
CTA-254O6.1	-1.67216	0.30039	1.6e-05	0.000608015
ZNF804A	-1.67224	0.27507	3.09e-06	0.000152653
IQGAP3	-1.67305	0.236519	1.07e-07	8.15e-06
BPIFA2	-1.67412	0.383877	0.000305189	0.00723505
TRIM67	-1.67829	0.295715	1.01e-05	0.000412337
PKMYT1	-1.67986	0.297529	1.06e-05	0.000428046
MATK	-1.68102	0.215253	0.000316706	0.00746926
RP11-36B6.1	-1.68228	0.374361	0.00027158	0.00658994
BANF1P2	-1.68347	0.284733	5.5e-06	0.00024975
HSPA12A	-1.6837	0.190256	8.07e-11	1.31e-08
ADAM8	-1.68538	0.18498	2.3e-11	4.35e-09
COL1A1	-1.68754	0.214438	4.62e-09	5e-07
KIAA0101	-1.68811	0.261097	7.95e-07	4.83e-05
RAC3	-1.68895	0.208786	1.91e-09	2.24e-07
MSX1	-1.6906	0.244635	1.41e-07	1.05e-05
POU5F1B	-1.69499	0.291319	6.07e-06	0.000271233
LINC01554	-1.6958	0.292826	7.03e-06	0.000305933
BST1	-1.69676	0.206567	1.04e-09	1.32e-07
IGHV3-72	-1.6991	0.341348	6.15e-05	0.00189488
RP11-834C11.8	-1.69951	0.28697	4.82e-06	0.000221443
EDARADD	-1.70051	0.24958	2.2e-07	1.55e-05
RP11-98G7.1	-1.70097	0.276682	2.42e-06	0.000123999
FCER1A	-1.70212	0.287316	4.05e-06	0.000194178
FAM83D	-1.70262	0.281036	2.72e-06	0.000137619
FEZF1-AS1	-1.7039	0.498097	4.08e-08	3.41e-06
KIRREL3	-1.70724	0.244489	2.6e-05	0.000923728
FAM225B	-1.71162	0.246294	1.25e-07	9.36e-06
CTD-2532K18.2	-1.71266	0.404127	0.000374143	0.00855226
ITIH3	-1.71273	0.219195	4.75e-09	5.12e-07
RP1-118J21.25	-1.71357	0.367951	0.00014505	0.00387143
SLC52A1	-1.71383	0.264525	5.5e-07	3.5e-05
CTA-268H5.14	-1.71645	0.401252	0.000133634	0.00361982
GPR19	-1.71723	0.249048	3.98e-05	0.00132211
ADH1C	-1.71964	0.387744	6.38e-11	1.05e-08
SUMO1P1	-1.72557	0.411002	0.000544121	0.0115991
CTD-2523D13.2	-1.72637	0.312079	1.25e-05	0.000488105
RP11-33A14.1	-1.72878	0.369897	9.5e-05	0.00270988
PODXL2	-1.73039	0.296411	4.49e-06	0.000209693
KCNQ4	-1.73137	0.203346	2.15e-10	3.17e-08
CA3-AS1	-1.73224	0.221388	2.15e-05	0.000783189
RP11-92G12.3	-1.73309	0.280782	1.69e-06	9.05e-05
TROAP	-1.73992	0.23886	3.02e-08	2.61e-06
FHAD1	-1.74087	0.227015	4.94e-05	0.00157658
AC079613.1	-1.74116	0.437967	0.000546965	0.0116364
SNORD3A	-1.74135	0.361234	0.000264294	0.00642292
LINC01055	-1.74164	0.583891	0.00313657	0.0492429
STYK1	-1.74451	0.268275	0.00014512	0.00387143
RP11-467I17.1	-1.74624	0.356943	6.73e-05	0.00204886
CERCAM	-1.74869	0.201576	8.42e-11	1.34e-08
WWC1	-1.751	0.175307	1.45e-13	4.45e-11
PAQR6	-1.75368	0.218788	1.44e-09	1.73e-07
TSPEAR	-1.7542	0.447142	0.000572332	0.0120875
LINC00565	-1.75485	0.217032	3.12e-05	0.00107781
LINC00944	-1.75618	0.410045	0.000295675	0.0070672
MAP7D2	-1.75788	0.335731	2.35e-05	0.000842161
GJB3	-1.75936	0.503267	0.000149127	0.00396839
MMP17	-1.76018	0.252477	8.29e-08	6.46e-06
RP11-554D14.4	-1.76106	0.533292	2.04e-05	0.000750823
RP5-907C10.3	-1.76125	0.628605	0.0022227	0.0374157
RCN3	-1.76173	0.210313	2.89e-10	4.16e-08
FLJ12825	-1.76389	0.237078	1.34e-08	1.27e-06
AURKB	-1.76542	0.238932	1.69e-08	1.55e-06
RP11-1008C21.1	-1.76641	0.265256	2.91e-07	1.98e-05
TPM2	-1.77193	0.169595	1.54e-06	8.47e-05
NKD2	-1.77326	0.341135	2.4e-05	0.000858122
POSTN	-1.77365	0.336894	1.97e-05	0.000731553
MEST	-1.77524	0.178177	9.89e-14	3.13e-11
TPTE2P1	-1.77568	0.256783	7.84e-08	6.14e-06
FAM201A	-1.77766	0.495346	1.87e-06	9.94e-05
CLDN2	-1.7791	0.312519	5.8e-06	0.000261301
RP11-31F19.1	-1.78052	0.390553	8.43e-05	0.00247232
FZD9	-1.78151	0.232922	5.37e-09	5.73e-07
ABCA9	-1.79094	0.29704	1.82e-06	9.7e-05
KB-1410C5.3	-1.7913	0.396499	8.15e-09	8.37e-07
AC090954.5	-1.79544	0.355347	7.45e-07	4.57e-05
ZAR1L	-1.79582	0.444602	0.000667838	0.0137676
LRRC71	-1.79745	0.245461	1.79e-08	1.62e-06
RP4-616B8.5	-1.79962	0.560328	0.00307474	0.048415
2020-03-10	-1.79996	0.328335	7.49e-06	0.000319427
CTD-2297D10.2	-1.80017	0.572363	8.32e-05	0.00244705
RP11-535A5.1	-1.80024	0.450646	0.000653545	0.0135166
VWA3B	-1.80032	0.242288	0.00135271	0.0249483
RP11-152K4.2	-1.80061	0.403202	0.00017365	0.0045156
FAM135B	-1.80102	0.345713	0.00196276	0.0336249
RP11-200A1.1	-1.80272	0.371221	6.49e-05	0.00198751
AP1M2	-1.80442	0.55139	8.47e-05	0.00247994
CGB7	-1.80576	0.280327	4.78e-07	3.07e-05
LINC00337	-1.80746	0.378797	8.83e-05	0.00256004
RP11-95H3.1	-1.80991	0.399488	0.000115689	0.00320964
TMIE	-1.81127	0.242843	8.93e-09	8.97e-07
CFAP47	-1.81372	0.339347	1.34e-05	0.000520299
VPREB3	-1.81693	0.344735	2.22e-05	0.000802688
LMCD1	-1.81852	0.26512	8.56e-08	6.65e-06
NEK2	-1.81868	0.248054	1.45e-08	1.36e-06
RP13-49I15.6	-1.81964	0.384421	0.000100633	0.00285139
IDH2	-1.82178	0.134839	2.46e-11	4.63e-09
CDCA7	-1.82814	0.266361	8.12e-08	6.34e-06
INMT-FAM188B	-1.82849	0.501034	0.000702601	0.014327
CYP4F34P	-1.82895	0.447751	0.000328933	0.0076951
ATP2A1-AS1	-1.83435	0.246754	8.66e-09	8.75e-07
RP13-395E19.2	-1.83658	0.346593	1.77e-05	0.000666371
IFITM10	-1.83739	0.183417	4.17e-14	1.42e-11
SCT	-1.83975	0.349367	1.48e-05	0.000568605
LAMA1	-1.84052	0.288061	4.1e-07	2.69e-05
RP11-159N11.3	-1.84229	0.524309	0.00127854	0.0237508
ASPM	-1.8423	0.254588	1.77e-08	1.62e-06
MAFA-AS1	-1.84363	0.604622	0.00269813	0.0438248
AC008746.10	-1.84541	0.385659	8.34e-05	0.0024499
RP1-80N2.3	-1.84725	0.319185	3.09e-06	0.000152593
GPRIN2	-1.84772	0.320901	3.33e-06	0.000163462
CENPA	-1.85134	0.247148	6.48e-09	6.81e-07
GLRA4	-1.85256	0.485005	0.000699294	0.0142778
GALNT8	-1.86094	0.29397	4.5e-07	2.9e-05
PRSS57	-1.86156	0.478833	0.000555953	0.0117962
CTD-2154I11.2	-1.86663	0.279318	1.37e-07	1.02e-05
MASP1	-1.86819	0.27114	5.72e-08	4.54e-06
RHCG	-1.86883	0.383494	0.00195012	0.0334263
KCNIP3	-1.86958	0.24306	2.54e-06	0.000129987
ANKRD20A9P	-1.87099	0.426789	0.000143074	0.00383287
CGN	-1.8742	0.255661	0.00106621	0.0203281
RP11-83M16.5	-1.87549	0.44665	0.000219995	0.00549695
NAV3	-1.8807	0.290692	2.49e-07	1.72e-05
IRX1	-1.8807	0.4886	0.000494406	0.0107226
RP11-12K11.1	-1.88192	0.383138	5.09e-05	0.00161436
RGS6	-1.88304	0.345027	7.12e-06	0.000308255
CTC-270D5.1	-1.88556	0.415509	9.75e-05	0.00276643
PRG4	-1.88717	0.393204	4.6e-05	0.00148975
PALM3	-1.89011	0.310997	4.32e-05	0.00141948
TNC	-1.89202	0.357051	1.1e-05	0.000439844
MIOX	-1.89303	0.506625	0.000855471	0.0169255
PLA2G5	-1.89899	0.396941	0.0019307	0.0331468
FIRRE	-1.90563	0.259296	7.6e-09	7.93e-07
RP11-752L20.5	-1.90759	0.410459	9.67e-05	0.00274754
CALB2	-1.90955	0.354738	1.62e-09	1.94e-07
RP11-4B16.3	-1.91037	0.40245	5.39e-05	0.00169681
RCVRN	-1.9118	0.316907	1.21e-06	6.94e-05
DUX4L50	-1.91637	0.24656	1.25e-09	1.53e-07
TNNT2	-1.91837	0.231908	1.02e-10	1.59e-08
LTK	-1.91977	0.293681	6.86e-06	0.00029937
BIRC5	-1.92596	0.256878	3.58e-09	4.01e-07
TMEM132A	-1.93116	0.203787	2.73e-13	7.72e-11
AC004221.2	-1.93587	0.395648	0.00180982	0.0315809
RP1-111D6.3	-1.93685	0.482742	0.000149872	0.00397828
P2RX6P	-1.93739	0.675803	0.0016317	0.0289955
USP32P3	-1.94	0.31112	3.53e-15	1.5e-12
RP11-617F23.1	-1.94148	0.170485	3.23e-11	5.92e-09
CDIPT-AS1	-1.94408	0.383404	1.95e-05	0.000724894
DSCAM	-1.94517	0.287163	0.000106959	0.00300134
DOK7	-1.94686	0.333896	0.000457489	0.0100682
MFI2	-1.9477	0.204992	1.15e-08	1.11e-06
SLC12A5	-1.94855	0.243163	0.00265298	0.0432674
RP11-624L4.1	-1.95148	0.513006	0.000482109	0.0105015
SPATC1	-1.96035	0.231101	3.9e-11	6.92e-09
AC142119.1	-1.96568	0.428432	9.04e-05	0.00260825
GATA6	-1.96701	0.212318	6.04e-13	1.59e-10
IL32	-1.97749	0.196146	1.02e-09	1.3e-07
SLC4A3	-1.97848	0.19365	2.85e-15	1.25e-12
U82695.9	-1.98471	0.345778	0.000298734	0.00712432
RP11-923I11.6	-1.98718	0.265805	2.79e-09	3.2e-07
HOXC4	-1.98857	0.211295	2.25e-13	6.59e-11
HOXC5	-1.98881	0.283309	1.83e-08	1.66e-06
CABLES1	-1.9899	0.208152	1.02e-13	3.19e-11
LINGO1	-1.99059	0.247646	2.08e-10	3.08e-08
RP11-524F11.3	-1.99263	0.363599	7.15e-06	0.000308674
CD19	-1.99444	0.286446	2.15e-08	1.93e-06
GRIN2C	-1.99669	0.190745	8.91e-06	0.000369808
DKFZp434J0226	-1.99678	0.357275	0.000334467	0.00781475
AC004540.4	-1.99891	0.343857	0.00244007	0.0402752
ITGAD	-1.99943	0.355277	2.57e-06	0.000130974
RP11-320G24.1	-1.99976	0.456454	0.000127856	0.00349558
RPS7P15	-2.00006	0.36515	5.95e-06	0.000267215
CRYBA2	-2.00224	0.484564	3.08e-07	2.09e-05
FCRLA	-2.01782	0.289628	0.00117728	0.0221794
LY6D	-2.02164	0.692827	0.00268908	0.0437222
RP11-551L14.6	-2.02214	0.48097	0.000192561	0.00492712
HPCAL4	-2.02275	0.376421	4.59e-11	7.92e-09
KB-173C10.2	-2.02528	0.377558	8.31e-06	0.000349012
MTRNR2L1	-2.02621	0.497939	9.35e-06	0.000385334
DOC2A	-2.033	0.251412	7.23e-09	7.57e-07
SPEG	-2.03677	0.198828	0.000319151	0.00751581
KLK6	-2.03707	0.722364	0.000345792	0.00802483
UBE2C	-2.03864	0.269183	1.28e-09	1.56e-07
PPP2R2B	-2.04017	0.304018	2.33e-10	3.41e-08
PCAT1	-2.04086	0.352479	1.16e-06	6.71e-05
BRINP1	-2.04565	0.356784	1.53e-06	8.43e-05
RP11-265N7.1	-2.04582	0.539448	0.000218932	0.00547895
LINC00619	-2.04754	0.353224	1.41e-06	7.94e-05
ATRNL1	-2.04873	0.232358	0.000623891	0.0129959
RP11-145A3.1	-2.05005	0.291102	9.85e-09	9.74e-07
MAP2	-2.05535	0.217083	0.000118118	0.00326918
KCTD4	-2.05657	0.40338	1.19e-05	0.000468229
RP11-68I18.10	-2.05824	0.19752	9.37e-06	0.000385366
MOG	-2.05891	0.514927	3.94e-05	0.00131462
RP11-326A19.4	-2.06131	0.487312	0.000153402	0.00406184
RP11-168P13.1	-2.06801	0.541563	0.00091721	0.0179689
FAM189A1	-2.07127	0.322761	1.19e-07	8.98e-06
SCX	-2.07413	0.290504	2.89e-06	0.000144354
CASC21	-2.07571	0.452356	7.25e-05	0.00218537
HCN2	-2.07871	0.229461	1.53e-08	1.42e-06
SOX6	-2.08163	0.224475	5.73e-06	0.000258949
CITF22-92A6.2	-2.08191	0.286287	3.77e-06	0.000181748
SLITRK6	-2.08381	0.531928	0.00225453	0.0379115
CD38	-2.08446	0.209622	0.000120947	0.00333236
NMU	-2.08486	0.393894	4.45e-05	0.00144867
RP11-714L20.1	-2.08561	0.394987	7.73e-06	0.00032907
FBXL21	-2.08625	0.447207	3.75e-05	0.00126199
DKK2	-2.08808	0.356748	7.56e-07	4.62e-05
IBSP	-2.08943	0.411686	0.00101728	0.019581
RP5-851M4.1	-2.0944	0.451677	3.89e-05	0.00130237
CTD-3187F8.14	-2.09705	0.466821	0.000144766	0.00386846
RP11-344F13.1	-2.09708	0.583713	0.00102784	0.0197266
AC067956.1	-2.1007	0.588319	0.000610685	0.0127624
C1orf127	-2.10734	0.217575	2.03e-06	0.000106106
PKD2L1	-2.10741	0.300435	1.05e-08	1.03e-06
RP11-636O21.1	-2.10844	0.557889	0.00193869	0.0332482
RP11-469N6.1	-2.10906	0.433787	1.97e-05	0.000733033
DNAJC5G	-2.11069	0.380481	0.000473443	0.0103282
RP11-401P9.7	-2.11148	0.34702	3.5e-07	2.33e-05
LINC00163	-2.11303	0.566816	0.00117549	0.0221588
BOK-AS1	-2.11918	0.459427	0.000121855	0.00335448
RP11-339B21.8	-2.12108	0.458844	4.58e-05	0.00148857
SLC12A1	-2.12114	0.331134	0.000154192	0.00406928
RP11-212I21.2	-2.1245	0.361427	5.61e-07	3.56e-05
GOLGA7B	-2.12518	0.254776	1.53e-05	0.00058332
RP11-429B14.4	-2.12634	0.799082	0.000568586	0.0120163
FOXD4L1	-2.13066	0.275244	0.000625918	0.0130211
RP11-373E16.1	-2.1359	0.431428	1.65e-05	0.000623515
PROM1	-2.14717	0.321082	2.35e-05	0.000842161
TAF7L	-2.15927	0.248916	3.06e-12	7.18e-10
FAM225A	-2.1593	0.2422	7.85e-13	2.04e-10
RP11-742B18.1	-2.16653	0.374146	8.08e-07	4.88e-05
CHCHD10	-2.1672	0.174674	5.61e-17	3.45e-14
RP11-96H17.3	-2.17335	0.545178	0.000228863	0.00567854
CYP26C1	-2.17346	0.355022	2.75e-07	1.88e-05
RP3-323A16.1	-2.17503	0.30515	4.06e-09	4.45e-07
SLCO1A2	-2.17957	0.525567	2.67e-05	0.00094123
DMD	-2.18266	0.210864	1.75e-16	9.64e-14
ADAMTS20	-2.18379	0.429796	1.1e-05	0.000441173
IGHV3-53	-2.19067	0.57648	0.000222627	0.00555837
RP11-373E16.3	-2.19393	0.315726	8.05e-09	8.33e-07
RP11-131N11.4	-2.19475	0.533692	0.00105284	0.0201318
VAX2	-2.19961	0.302665	1.79e-09	2.12e-07
RP11-635L1.3	-2.20255	0.571749	0.00106016	0.0202358
LINC00924	-2.20687	0.29954	1.19e-09	1.48e-07
RP11-395N3.1	-2.20714	0.377217	9.66e-07	5.7e-05
CXCR2P1	-2.20744	0.317642	0.000252772	0.00620427
RP11-481J13.1	-2.20774	0.434887	0.00230288	0.0385217
MIR4477B	-2.21315	0.444667	2.03e-05	0.000749731
AFAP1-AS1	-2.2167	0.357875	8.71e-18	5.8e-15
RP11-538I12.3	-2.22285	0.547232	0.00052753	0.0113194
DLGAP3	-2.22469	0.219816	1.21e-08	1.15e-06
HGFAC	-2.22613	0.323788	4.39e-05	0.00143519
CTA-246H3.12	-2.23022	0.66672	0.00295677	0.0469745
KCNH1-IT1	-2.23024	0.444052	9.38e-06	0.000385366
RP11-143A12.3	-2.23816	0.410956	2.58e-06	0.000131519
ASPHD1	-2.24242	0.275909	0.000125934	0.00344597
RP3-399J4.2	-2.24416	0.315671	3.04e-09	3.43e-07
CNIH2	-2.24514	0.240657	9.61e-10	1.24e-07
ASPG	-2.24547	0.441903	6.67e-06	0.00029248
AC068057.1	-2.24835	0.387591	6.9e-07	4.27e-05
ALOX15	-2.26243	0.339524	2.09e-08	1.88e-06
2020-03-04	-2.26272	0.365687	6.17e-06	0.000273842
FXYD7	-2.26673	0.290381	1.37e-06	7.71e-05
RHOBTB3	-2.26892	0.241366	2.4e-14	8.7e-12
XXbac-BPG27H4.8	-2.27617	0.344638	2.25e-08	2.01e-06
ACSL6	-2.2776	0.295581	1.81e-05	0.000680621
FIGNL2	-2.28283	0.414764	1.8e-06	9.58e-05
VIT	-2.28959	0.44525	3.64e-10	5.1e-08
CTSV	-2.29182	0.295153	1.2e-10	1.84e-08
LINC01561	-2.29218	0.41025	0.00024179	0.00596223
MMP23B	-2.29698	0.53268	0.00279864	0.0449995
LINC00466	-2.29709	0.539065	0.00181512	0.0316561
TUBB2B	-2.29897	0.274879	0.000421558	0.00943704
SYTL5	-2.30192	0.279309	5.99e-16	3.14e-13
LINC00839	-2.30263	0.409044	9.36e-07	5.55e-05
FGF7	-2.32319	0.372195	8.63e-08	6.69e-06
LINC01021	-2.32458	0.391675	3.18e-05	0.00109584
NKD1	-2.32897	0.269589	1.09e-12	2.78e-10
MATN3	-2.33801	0.245674	8.29e-09	8.47e-07
PLCH2	-2.34087	0.283288	3.38e-05	0.00115404
IGDCC3	-2.34247	0.338532	4.59e-09	4.98e-07
LUM	-2.34576	0.329493	8.01e-06	0.000338172
CNDP1	-2.35323	0.335763	2.86e-06	0.000143158
CLDN9	-2.35615	0.296021	3.73e-11	6.65e-09
COL10A1	-2.357	0.357578	4.24e-10	5.76e-08
GALNT9	-2.36599	0.310518	1.47e-11	2.93e-09
NPPC	-2.36916	0.578087	4.07e-06	0.000194931
PRKCQ-AS1	-2.37377	0.254256	0.00206866	0.035212
GBX2	-2.37562	0.316076	2.99e-06	0.000149166
RP11-86K22.2	-2.37752	0.513978	0.00173066	0.0304475
IL31RA	-2.38106	0.528827	0.000138476	0.00372845
TMED10P2	-2.38167	0.447768	2.2e-06	0.000113835
RP11-284F21.9	-2.3829	0.40506	2.62e-07	1.8e-05
RP11-556I14.1	-2.38651	0.320994	4.06e-10	5.53e-08
GREM1	-2.402	0.465305	1.59e-06	8.68e-05
ATP6V1B1	-2.40416	0.282518	1.42e-12	3.54e-10
RP11-268G12.1	-2.40447	0.669999	0.000324783	0.00762518
FOXD3-AS1	-2.41123	0.524852	0.00145469	0.026432
RP11-395N3.2	-2.4125	0.21153	1.74e-20	1.63e-17
ANO4	-2.41334	0.353966	5.64e-09	6e-07
HMX1	-2.41375	0.345468	3.76e-06	0.000181629
LINC00460	-2.43524	0.440628	8.74e-07	5.24e-05
LY6K	-2.44621	0.313771	1.2e-05	0.000471648
BRSK2	-2.44779	0.229052	0.00097297	0.0188645
AC092652.1	-2.4536	0.478747	0.000415328	0.00932677
RASGEF1A	-2.45486	0.243121	2.31e-07	1.61e-05
EFNA2	-2.46298	0.293922	3.55e-05	0.00120553
RP11-401P9.4	-2.46917	0.281664	2.34e-13	6.79e-11
AMH	-2.4808	0.335667	2.97e-10	4.24e-08
STOML3	-2.48796	0.361209	2.99e-09	3.39e-07
RP11-398M15.1	-2.48801	0.518419	1.17e-05	0.000463054
FLJ43879	-2.49463	0.423444	2.31e-07	1.61e-05
SEZ6	-2.50216	0.271553	0.00137544	0.0252425
LINC01474	-2.50922	0.675732	0.000921971	0.01804
SNORD3B-2	-2.50935	0.705183	0.000854827	0.0169232
TMC3	-2.51139	0.376294	7.19e-07	4.41e-05
RP11-208N14.4	-2.51703	0.656356	0.000497281	0.0107586
IRX2	-2.51755	0.312983	1.19e-05	0.000470424
RP11-297C4.3	-2.52164	0.745837	0.00247072	0.0406688
LINC01447	-2.52815	0.590964	0.000339111	0.00788699
SATB2-AS1	-2.54301	0.462521	0.000644823	0.0133535
CXCL1	-2.54342	0.371649	0.00135559	0.0249498
SLC5A5	-2.55169	0.422935	6.21e-14	2.04e-11
CPA4	-2.55614	0.258047	1.29e-16	7.24e-14
AC012506.2	-2.56486	0.464328	1.6e-06	8.7e-05
LINC01234	-2.56946	0.478866	3.94e-07	2.59e-05
VWA5B2	-2.57244	0.193168	1.39e-06	7.82e-05
SLC34A2	-2.5742	0.40349	4.05e-12	9.25e-10
LGSN	-2.57758	0.451241	4.64e-07	2.99e-05
ANKRD1	-2.57771	0.342352	1.06e-09	1.33e-07
ADORA1	-2.57934	0.284868	1.04e-10	1.61e-08
LA16c-380H5.5	-2.58578	0.27824	1.64e-06	8.88e-05
C5orf38	-2.59185	0.368739	9.47e-10	1.23e-07
TMEM59L	-2.59192	0.278212	4.46e-15	1.85e-12
HOXC6	-2.60231	0.304987	4.33e-13	1.16e-10
HSPB6	-2.61535	0.211096	1.51e-07	1.1e-05
CACNG8	-2.61607	0.329563	1.84e-07	1.31e-05
CFHR1	-2.6248	0.427404	8.32e-06	0.000349012
MOBP	-2.62699	0.345227	4.83e-07	3.1e-05
ADARB2	-2.63153	0.313567	2.34e-08	2.08e-06
CHRNA3	-2.63207	0.388899	1.08e-05	0.000435157
RP11-659P15.1	-2.63496	0.534384	2.57e-05	0.000915458
HPD	-2.63609	0.291445	1.36e-14	5.12e-12
ZFPM2-AS1	-2.63714	0.430778	5.28e-06	0.00024074
GCK	-2.63715	0.364156	7.7e-08	6.04e-06
DNAH2	-2.63729	0.248182	1.86e-05	0.00069929
RP11-84D1.1	-2.63993	0.57814	0.000687996	0.0140922
RP11-567G11.1	-2.64724	0.851006	0.00161284	0.0287405
RP11-145A3.2	-2.64872	0.348883	5.56e-11	9.35e-09
ANKRD33	-2.6546	0.622471	0.000134345	0.00362947
DRD2	-2.65539	0.313423	4.67e-13	1.24e-10
ELFN1-AS1	-2.66614	0.461864	5.88e-06	0.000264574
LINC01114	-2.68648	0.326122	1.7e-08	1.56e-06
CCDC190	-2.6916	0.426253	1.47e-05	0.000566641
TMPRSS13	-2.69166	0.165157	0.00120337	0.0226042
MYBL2	-2.69332	0.29899	1.71e-14	6.35e-12
LMO7DN-IT1	-2.70578	0.481529	3.36e-07	2.25e-05
PRND	-2.71047	0.37479	6.58e-05	0.00200958
RP11-162I7.1	-2.71214	0.490219	0.00011171	0.00311549
PLCE1-AS1	-2.7175	0.284579	5.54e-16	2.95e-13
NPTX2	-2.72204	0.349288	0.000229233	0.0056833
TGFBR3L	-2.72221	0.385385	1.18e-05	0.000465823
HKDC1	-2.72255	0.342692	4.24e-05	0.00139498
CCDC64B	-2.72672	0.567467	0.00192344	0.0330399
FAM195CP	-2.73703	0.562822	5.16e-06	0.000235519
RP11-715H19.2	-2.75874	0.509118	8.06e-07	4.88e-05
GPM6A	-2.75976	0.313611	0.0029444	0.0468438
CCDC175	-2.76254	0.526227	2.08e-06	0.000108131
DRP2	-2.77346	0.247287	9.67e-05	0.00274754
COL26A1	-2.77719	0.295924	1.04e-15	5.13e-13
GDA	-2.77825	0.396402	0.000138884	0.0037363
GATA6-AS1	-2.78596	0.299732	2.15e-15	9.82e-13
OOEP	-2.78692	0.634378	2.01e-05	0.000743023
AC016768.1	-2.79016	0.360577	1.76e-11	3.44e-09
TMEM130	-2.79852	0.347518	3.05e-18	2.12e-15
PTX3	-2.80759	0.278363	7.87e-11	1.28e-08
OTX1	-2.80985	0.395258	3.85e-10	5.28e-08
PCDH7	-2.8123	0.347487	1.11e-05	0.000444232
MME	-2.81451	0.371999	3.35e-11	6.11e-09
LYPD8	-2.82036	0.642002	4.41e-10	5.97e-08
RP11-268G12.3	-2.82543	0.606636	8.67e-06	0.000361378
CLEC4F	-2.82555	0.311864	8.33e-11	1.34e-08
AC011997.1	-2.83767	0.662508	0.000257	0.00628391
GATA5	-2.84082	0.539672	2.74e-05	0.000962018
GS1-600G8.5	-2.86436	0.485037	3.37e-06	0.000165136
CA3	-2.86589	0.411235	7.86e-12	1.63e-09
LMO7DN	-2.86619	0.40941	5.23e-10	6.99e-08
AQP6	-2.88179	0.309366	0.000578682	0.0122093
NTM	-2.88356	0.321368	8.15e-15	3.21e-12
CTD-2128A3.2	-2.89117	0.596987	1.39e-05	0.000537065
CHRM2	-2.91039	0.581726	8.09e-05	0.00239003
KCNA1	-2.9136	0.408143	0.00135385	0.0249483
RP11-809C18.3	-2.91769	0.566273	0.000445666	0.00984667
CD207	-2.91795	0.320323	3.49e-15	1.5e-12
TMEM8C	-2.92793	0.600074	0.000106917	0.00300134
DRAXIN	-2.93965	0.249773	2.58e-08	2.25e-06
NTF4	-2.94351	0.29603	1.39e-17	9.03e-15
KSR2	-2.95409	0.395579	1.6e-05	0.000607799
HOXA13	-2.95784	0.429153	9.61e-16	4.95e-13
IQCA1L	-2.96578	0.456187	0.0018543	0.0321638
MAG	-2.96622	0.39474	0.00216567	0.0366294
PCP4	-2.96915	0.314185	2.04e-05	0.000750949
PLXNB3	-2.97534	0.256804	8.97e-07	5.35e-05
ESRRG	-2.98485	0.404176	5.4e-11	9.12e-09
SLC22A6	-2.9933	0.562232	8.7e-15	3.38e-12
INMT	-2.99633	0.31291	1e-16	5.72e-14
INS-IGF2	-3.01213	0.496979	2.56e-08	2.25e-06
RP13-487K5.1	-3.01431	0.53451	2.48e-07	1.72e-05
RP11-359P18.6	-3.01819	0.985855	0.000112495	0.0031319
RP11-603B24.1	-3.01914	0.637789	0.000755568	0.0152417
LINC00911	-3.02691	0.499762	3.08e-08	2.65e-06
HBE1	-3.0453	0.255132	2.99e-06	0.000149166
KRTAP13-4	-3.06315	0.497524	3.67e-09	4.07e-07
MYOZ2	-3.079	0.245616	7.6e-05	0.00227234
SH3GL2	-3.08736	0.291711	0.00099046	0.0191455
SLC22A31	-3.08815	0.445181	4.7e-15	1.91e-12
BX255923.3	-3.11782	0.5917	0.000197438	0.00502774
PRKCQ	-3.12429	0.234321	0.00236417	0.0394025
ALDH1A1	-3.14173	0.226104	1.06e-06	6.23e-05
NCAN	-3.14177	0.407792	7.51e-05	0.00225089
LY6H	-3.15155	0.32163	1.88e-06	9.94e-05
RP11-268P4.5	-3.16359	0.555308	0.000359988	0.00828804
RP11-627G23.1	-3.16581	0.455994	4.82e-10	6.47e-08
ARX	-3.16647	0.532256	0.000107374	0.00301034
EMX1	-3.18545	0.537463	0.00303102	0.0479157
CNTN6	-3.19007	0.304729	5.53e-20	4.65e-17
HOXA11-AS	-3.19619	0.596472	8.72e-07	5.24e-05
PDZK1IP1	-3.19801	0.359192	1.82e-11	3.52e-09
RP11-167H9.3	-3.20442	0.612521	2.7e-06	0.000136684
FOXG1	-3.20935	0.535591	1.47e-06	8.2e-05
ADD2	-3.22165	0.279314	1.44e-09	1.73e-07
GSTA1	-3.22254	0.403376	0.000792616	0.0158787
ATP10B	-3.22794	0.512614	9.75e-08	7.5e-06
DUX4L9	-3.23203	0.416992	5.53e-12	1.19e-09
DCC	-3.23638	0.379361	3.14e-14	1.11e-11
S100B	-3.24102	0.35778	1e-15	5.08e-13
LINC01143	-3.24256	0.809918	0.00207308	0.03525
UPK1A	-3.25486	0.295742	0.00189715	0.0326769
SNAP25-AS1	-3.25568	0.664542	0.000103334	0.002915
TECRL	-3.25651	0.82145	0.00118836	0.022375
HOXB13	-3.26219	0.460894	1.25e-22	1.74e-19
CD1A	-3.26387	0.528197	2.49e-06	0.00012766
KRT7	-3.27329	0.377526	0.000627797	0.0130517
DTX1	-3.29872	0.375476	4.43e-08	3.66e-06
NIPAL4	-3.31486	0.454254	0.00242118	0.0400759
FOXJ1	-3.31529	0.578149	0.000959744	0.0186647
TMEM151A	-3.3207	0.380156	2.36e-06	0.000121281
ATP4A	-3.34439	0.712448	0.000745263	0.0150814
DLX2	-3.34618	0.671385	0.00275582	0.0444227
NEFLP1	-3.34643	0.950533	0.000441116	0.00978205
PCAT7	-3.35557	0.64147	5.94e-07	3.75e-05
RP5-978I12.1	-3.3659	0.645111	5.97e-07	3.76e-05
ASIC4	-3.36766	0.298033	1.14e-09	1.43e-07
NPY6R	-3.37131	0.357589	5.76e-24	9.2e-21
Vax2os1_3	-3.37957	0.858684	0.00222625	0.0374557
C11orf87	-3.39186	0.515724	1.41e-08	1.32e-06
C4BPB	-3.40139	0.279617	3.2e-14	1.12e-11
RP11-61O11.1	-3.42794	0.472786	4.68e-05	0.00150829
LINC00844	-3.4288	0.358677	0.000984896	0.0190726
HHATL	-3.43857	0.493771	0.00206024	0.0350878
LY86-AS1	-3.44109	0.463414	0.00270475	0.0438834
RP11-357D18.1	-3.44509	0.509071	5.87e-09	6.21e-07
EDAR	-3.44595	0.387452	2.42e-08	2.14e-06
FAM181B	-3.44701	0.322215	0.000312072	0.00737631
MGAT5B	-3.4486	0.298245	0.000484617	0.0105417
GLRA3	-3.45167	0.793617	0.0011639	0.0219922
RP11-25O3.1	-3.45876	0.782577	0.00112665	0.0213769
FABP7	-3.46658	0.47913	1.85e-07	1.31e-05
LINC01524	-3.48885	0.892713	0.00154136	0.0277297
LRRC15	-3.50742	0.472307	0.000203664	0.00514525
HPR	-3.51646	0.420697	3.7e-14	1.27e-11
TMPRSS3	-3.53669	0.437912	1.52e-06	8.42e-05
AC079776.2	-3.53876	0.410084	5.55e-08	4.45e-06
BCAS1	-3.5404	0.545912	5.62e-06	0.00025497
CDH15	-3.54105	0.377251	0.000153663	0.00406539
XKR4	-3.55316	0.600293	8.83e-05	0.00256004
RP11-509A17.3	-3.57661	0.588348	0.000160649	0.00422223
MGAT4C	-3.57676	0.609212	0.00243367	0.0402248
ANKFN1	-3.57778	0.42084	0.000533844	0.0114181
POU3F2	-3.5787	0.344865	1.09e-06	6.36e-05
B3GAT1	-3.58056	0.288979	3.77e-19	2.8e-16
RP11-359P18.7	-3.58083	0.908173	9.93e-06	0.000405958
LAD1	-3.61617	0.325871	4.22e-11	7.37e-09
NRK	-3.61829	0.577139	0.000869773	0.0171447
HOXA11	-3.61848	0.461689	4.92e-09	5.27e-07
CD70	-3.63032	0.325495	1.43e-07	1.05e-05
PSCA	-3.6365	0.346367	4.09e-06	0.00019518
NDP	-3.63915	0.482913	0.000424723	0.00948438
KREMEN2	-3.64023	0.326117	8.71e-05	0.00252827
DUSP9	-3.64681	0.393881	1.98e-11	3.81e-09
SYT8	-3.66055	0.551073	2.09e-05	0.000765082
RP4-568C11.4	-3.66213	0.42888	1.32e-08	1.25e-06
MAS1	-3.6657	0.485989	4.83e-06	0.000221603
ELAVL4	-3.67309	0.265164	6.32e-07	3.96e-05
TUBB8P12	-3.67714	0.797447	0.00106628	0.0203281
GFRA2	-3.67965	0.302616	7.86e-06	0.00033343
MAP1LC3C	-3.69031	0.352067	7.88e-17	4.66e-14
MYADML2	-3.69873	0.353029	0.00240759	0.0399177
AK5	-3.70529	0.294159	0.000198705	0.00505195
ATP6V0D2	-3.70983	0.544475	8.71e-05	0.00252827
KIF1A	-3.71436	0.305667	2.91e-17	1.82e-14
KCNJ10	-3.71649	0.285469	0.000389604	0.00881731
SLC13A5	-3.73141	0.553672	0.000424184	0.00948438
CTD-2555A7.2	-3.73992	0.661961	8.66e-05	0.00252137
DAO	-3.74734	0.456714	3.68e-14	1.27e-11
KBTBD12	-3.77085	0.257648	0.000202682	0.0051269
RASAL1	-3.77502	0.411038	2.05e-06	0.000107016
RP5-984P4.6	-3.78228	0.756845	0.000153981	0.00406928
DLK1	-3.78262	0.589346	0.00187603	0.0324701
FAM57B	-3.82544	0.37002	8.97e-09	8.97e-07
CYP26A1	-3.84663	0.392614	5.34e-15	2.13e-12
PERM1	-3.85085	0.287088	4.36e-05	0.00143027
CTNNA2	-3.86139	0.498977	2.95e-10	4.22e-08
SNX18P27	-3.87588	0.772521	4.42e-07	2.86e-05
DMRT2	-3.90342	0.883907	0.00164387	0.0291505
RP11-236B18.2	-3.90803	0.442296	3.98e-13	1.08e-10
LAMP5-AS1	-3.91335	0.73939	1.98e-06	0.000103937
KCNN1	-3.91811	0.297624	1.05e-08	1.03e-06
FAM69C	-3.91974	0.394925	7.82e-07	4.76e-05
RP13-766D20.4	-3.92858	0.509865	6.71e-05	0.00204588
RP11-473E2.4	-3.93627	0.826624	0.000174893	0.00454054
TLX2	-3.93788	0.638118	2.64e-05	0.000932207
TLX1NB	-3.94562	0.608002	7.72e-10	1.01e-07
DLX1	-3.95021	0.392259	9.5e-10	1.23e-07
ITLN1	-3.96735	0.455472	2.32e-15	1.03e-12
SYNGR3	-3.9715	0.294493	1.2e-24	2.13e-21
L1CAM	-3.9732	0.310569	1.8e-15	8.32e-13
PAX1	-3.99985	1.13623	0.00044362	0.00981712
LINC00632	-4.00898	0.458074	1.23e-07	9.26e-06
GFAP	-4.01983	0.441276	4.93e-11	8.41e-09
IGF2BP1	-4.01991	0.403615	3.15e-11	5.81e-09
SCG3	-4.0435	0.333386	0.000218924	0.00547895
XIRP1	-4.04577	0.390535	0.000811319	0.0162025
RP11-865I6.2	-4.04682	0.412934	0.000674296	0.0138739
OLIG1	-4.06937	0.353278	4.81e-09	5.17e-07
ATP1A3	-4.07265	0.321756	1.95e-05	0.000724894
BRINP3	-4.11285	0.777804	0.00147098	0.0266587
TLX1	-4.11292	0.470134	5.14e-12	1.12e-09
ADRA1D	-4.11305	0.342399	2.44e-27	5.99e-24
ANKRD2	-4.13815	0.448382	0.00274065	0.0442676
TRIML2	-4.15424	0.402541	0.000586446	0.0123204
RP11-359P18.5	-4.17947	0.95626	0.000357599	0.0082477
BCYRN1	-4.18122	0.27439	1.3e-10	1.98e-08
PAX2	-4.18996	0.491104	4.05e-25	7.61e-22
LPO	-4.19379	0.412567	2.49e-05	0.000887243
HOXD13	-4.21344	0.578273	5.48e-12	1.19e-09
CDK5R2	-4.24029	0.358127	9.05e-05	0.00260825
WDR72	-4.26559	0.697319	0.00217029	0.036688
KCNQ5	-4.29456	0.397377	0.000168902	0.00441372
HOXA7	-4.29509	0.733518	1.01e-08	9.92e-07
SYT13	-4.29983	0.35008	2.67e-07	1.83e-05
CEND1	-4.33029	0.287091	4.71e-15	1.91e-12
MEPE	-4.34838	0.598123	4.09e-06	0.00019518
HOXC-AS3	-4.35077	0.576885	7.46e-06	0.000319084
CXCL6	-4.37587	0.519822	0.000666509	0.0137499
STMN4	-4.40312	0.426577	0.00167444	0.0296068
PTPRQ	-4.43067	0.436788	0.000122903	0.00337248
NR2E1	-4.45123	0.397591	1.27e-07	9.44e-06
MURC	-4.4624	0.251834	0.000722803	0.0146758
XXyac-YM21GA2.7	-4.47279	0.826454	6.67e-05	0.00203383
ASB2	-4.47412	0.223477	4.22e-06	0.000200336
LINC01514	-4.48021	0.637241	2.17e-11	4.16e-09
PRAC2	-4.4823	0.497235	4.8e-20	4.14e-17
ICAM5	-4.49667	0.3861	5.08e-24	8.53e-21
TUBB4A	-4.50358	0.306834	1.19e-09	1.48e-07
CXCL5	-4.56089	0.404598	1.58e-05	0.000599652
SCRT2	-4.57049	0.795542	0.00296653	0.047106
RP11-362K2.2	-4.57888	0.561617	3.8e-12	8.74e-10
CCKAR	-4.59435	0.525875	1.15e-31	4.58e-28
HOXA10	-4.60229	0.399248	3.15e-26	7.18e-23
CCNYL2	-4.61312	0.897603	0.000334786	0.00781485
TNR	-4.63095	0.512186	0.00168484	0.0297577
IGFN1	-4.63636	0.3776	8.85e-09	8.91e-07
RP11-767I20.1	-4.66526	0.359475	5.2e-32	2.37e-28
NKX6-2	-4.67442	0.556901	1.04e-06	6.1e-05
HOXC13-AS	-4.72191	0.641038	3.56e-11	6.45e-09
NKX2-5	-4.76096	0.579434	4.31e-14	1.45e-11
DUX4	-4.76353	0.852004	8.83e-07	5.28e-05
CYP4F44P	-4.78684	0.877833	1.66e-07	1.2e-05
RLBP1	-4.79649	0.750203	0.00173601	0.0305096
AC012531.25	-4.80303	0.610597	1.78e-11	3.46e-09
LHX2	-4.80578	0.469137	4.19e-06	0.000199221
RAB25	-4.88256	0.452909	9.32e-05	0.00266775
RP11-834C11.6	-4.92015	0.538971	1.2e-13	3.73e-11
LINC00461	-4.92978	0.665912	7.33e-06	0.000314706
TTYH1	-4.94335	0.321658	3.37e-13	9.28e-11
GRIA4	-4.94427	0.366013	6.62e-06	0.000290955
SST	-4.94718	0.623649	0.000154087	0.00406928
ALPK2	-4.95036	0.31523	3.86e-26	8.22e-23
C1QL4	-4.97181	0.459349	2.41e-07	1.67e-05
ATP2B3	-4.99006	0.362785	1.48e-12	3.66e-10
HEPACAM	-4.99172	0.430419	3.56e-08	3.02e-06
C1orf87	-5.00152	0.766767	0.00041372	0.00930531
GNG3	-5.02167	0.280687	0.00237648	0.0395251
RXRG	-5.0228	0.503901	1.94e-09	2.27e-07
LINC00634	-5.05516	0.443357	0.00113955	0.0216087
MYOZ1	-5.05682	0.187705	7.06e-06	0.000306826
RP11-398J10.2	-5.0655	0.405679	3.1e-13	8.7e-11
DUSP26	-5.11735	0.360983	4.9e-14	1.63e-11
PTPRZ1	-5.11824	0.588217	1.89e-08	1.71e-06
SHD	-5.12982	0.452604	5.04e-07	3.22e-05
WNT7A	-5.1344	0.969157	0.000532478	0.0113965
RP11-357H14.17	-5.19086	0.596103	1.13e-06	6.55e-05
ENO3	-5.21635	0.126799	5.96e-05	0.0018468
DDN	-5.22586	0.290849	8e-05	0.00236422
IGHV5-78	-5.26865	0.639222	0.00012062	0.00332622
AC092484.1	-5.27174	0.969887	0.00075436	0.0152269
OLIG2	-5.31989	0.504108	2.95e-09	3.37e-07
MLC1	-5.33239	0.388505	2.62e-11	4.89e-09
PMP2	-5.35755	0.739506	6.03e-06	0.000269738
COL20A1	-5.36534	0.415414	1.12e-10	1.72e-08
HOXC13	-5.36771	0.565486	4.02e-09	4.42e-07
GAD1	-5.3679	0.397971	0.000103276	0.002915
C1orf61	-5.37814	0.420483	6.03e-11	9.98e-09
HOXC-AS2	-5.38457	0.507031	2.73e-14	9.79e-12
PITX2	-5.41825	0.662344	5.24e-08	4.23e-06
WT1	-5.44036	0.652859	2.5e-07	1.73e-05
LINC01436	-5.50298	0.458303	1.89e-29	6.71e-26
HOXC8	-5.52229	0.463466	8.09e-29	2.35e-25
RPH3A	-5.52562	0.403902	5.65e-10	7.51e-08
ATP2B2	-5.55491	0.286078	7.1e-13	1.86e-10
HAND2-AS1	-5.59391	0.890379	1.13e-05	0.000451014
RP11-197K6.1	-5.61081	0.844644	2.78e-06	0.000139915
SHOX	-5.61407	0.628993	0.000505786	0.0109204
SLC6A7	-5.61693	0.48746	0.000178516	0.00463082
AC008060.7	-5.65551	0.628608	9.32e-07	5.53e-05
LAMP5	-5.80882	0.342748	9.2e-56	2.94e-51
ADCY8	-5.81323	0.813674	0.000366399	0.00840534
CLEC2A	-5.81674	0.589599	8.78e-15	3.38e-12
HAND2	-5.85291	0.789434	1.36e-06	7.69e-05
ASB4	-5.8627	0.490739	5.97e-05	0.00185005
SYNPO2L	-5.89349	0.193366	0.00247668	0.040746
RP5-912I13.1	-5.97747	0.548413	1.06e-11	2.18e-09
SOX1	-6.03986	0.92576	3.88e-05	0.00130003
GRIA2	-6.04984	0.621899	0.000393332	0.00888909
SPAG6	-6.07475	0.510553	0.000191431	0.00490606
TRIM54	-6.08082	0.511161	1.91e-07	1.35e-05
PLEKHS1	-6.08331	0.497198	0.000378869	0.00863556
CTD-2377D24.6	-6.09373	0.360062	2.8e-12	6.68e-10
HOXC9	-6.13357	0.411679	3.74e-44	3.98e-40
F5	-6.13803	0.372118	7.99e-38	5.1e-34
OTOR	-6.17691	0.640463	1.22e-06	6.99e-05
SOX2	-6.21696	0.522426	1.67e-07	1.2e-05
PAX3	-6.2441	0.840454	0.00242215	0.0400759
CHI3L1	-6.30727	0.40184	2.84e-12	6.72e-10
CACNG7	-6.35871	0.743297	1.43e-07	1.05e-05
COMP	-6.39124	0.31462	1.48e-07	1.08e-05
HOXC-AS1	-6.43077	0.590493	9.38e-28	2.5e-24
CPLX2	-6.44758	0.616071	5.53e-05	0.00173464
SMCO1	-6.47514	0.506852	2.66e-06	0.000135178
LRRTM4	-6.62256	0.719554	1.59e-11	3.15e-09
HSPB3	-6.62641	0.758941	0.000965921	0.018762
SVOP	-6.64127	0.599998	4.87e-05	0.00156045
HOTAIR	-6.76616	0.789888	1.59e-07	1.15e-05
HOXB9	-6.81912	0.782331	1.5e-07	1.09e-05
MYOT	-6.82379	0.277537	0.000201424	0.00510482
SNAP25	-6.84534	0.409684	1.69e-06	9.05e-05
KCNQ2	-6.85156	0.49033	0.000472744	0.0103278
PRAME	-6.87498	0.717673	7.51e-18	5.1e-15
HOXC10	-6.93389	0.534469	1.51e-21	1.61e-18
TERT	-6.94158	1.18247	0.000639812	0.0132619
TBR1	-7.04991	0.7377	1.05e-05	0.000425282
SLN	-7.07475	0.575559	0.0010436	0.0199912
KRT4	-7.13224	0.414592	4.22e-12	9.56e-10
SCN1A	-7.25453	0.804454	0.00046875	0.0102595
BCAN	-7.36291	0.400233	3.76e-23	5.45e-20
HOXC11	-7.4195	0.747804	8.8e-11	1.38e-08
SNCB	-7.51665	0.404006	0.00102794	0.0197266
GATA4	-7.53722	0.920074	5.14e-08	4.18e-06
MYL2	-7.77799	0.482491	0.00152684	0.0275306
TNNI1	-7.81391	0.324604	3.26e-25	6.51e-22
HOXC12	-8.07686	1.21573	4.66e-06	0.000216219
MYO18B	-8.17346	0.973703	0.000429451	0.00958327
CASQ1	-8.29233	0.268084	1.81e-07	1.3e-05
RNA5-8S5	-8.42376	1.06265	7.32e-05	0.00220436
MYBPC1	-9.13793	0.364124	3.66e-07	2.42e-05
[truncated: 7 more rows]

## Sheet: Immune-enriched
Gene	log2FoldChange	lfcSE	pvalue	padj
MYH1	15.3844	0.799023	8.62591e-05	0.00733291
XIRP2	13.1303	0.638323	0.000408302	0.0258819
MYH7	12.0231	0.420497	7.29096e-10	2.44761e-07
MB	11.8309	0.466532	8.62079e-17	1.41808e-13
MYBPC1	10.4241	0.324285	4.14248e-14	3.89381e-11
DES	9.53484	0.324332	0.000366265	0.0238609
CASQ1	8.95422	0.24324	9.32716e-09	2.3973e-06
ACTN2	8.87815	0.384204	6.93442e-22	2.28136e-18
SLN	8.78938	0.525996	1.25666e-06	0.000196871
FBXO40	8.66651	0.32678	0.000772038	0.0429042
EIF4E1B	8.6581	1.25996	1.15577e-07	2.30447e-05
TBR1	7.90331	0.617667	1.23338e-10	5.00949e-08
SMPX	7.88083	0.505808	2.3482e-09	7.02305e-07
SMCO1	7.64905	0.437834	2.69801e-11	1.2864e-08
MYOT	7.52349	0.253076	6.36374e-05	0.0056584
BCAN	7.47432	0.368971	6.49476e-21	1.94247e-17
HSPB3	7.3415	0.688975	0.000369496	0.0240238
CHI3L1	7.12616	0.400205	5.9573e-22	2.17766e-18
ARMC3	7.02956	0.413444	0.000501332	0.0304867
GABRG2	6.80215	1.08152	5.67484e-05	0.00515736
MYT1L	6.76205	0.783836	1.7117e-05	0.00185241
SCN1A	6.63942	0.815517	0.000288381	0.0197244
COMP	6.60947	0.296001	0.000177936	0.0134901
SVOP	6.5659	0.511852	2.56044e-05	0.00265728
SOX2	6.53577	0.51863	6.04386e-11	2.67502e-08
SPAG6	6.40762	0.464233	9.3566e-05	0.00775372
GRIA2	6.39136	0.579572	0.000216799	0.0155392
TRIM54	6.38424	0.437391	8.23816e-10	2.71027e-07
CHGA	6.35292	0.70759	5.01931e-07	8.52241e-05
ASB4	6.33964	0.442259	0.000180989	0.0135945
RPH3A	6.16126	0.354981	5.64847e-15	6.47172e-12
MLC1	6.13576	0.369642	4.3378e-10	1.51818e-07
SHOX	6.1193	0.536445	6.75247e-05	0.00593983
WNT7A	6.10784	0.792112	6.80801e-06	0.000829544
SYNPR	6.09756	1.09287	0.000691367	0.0398341
C1orf87	6.09225	0.61511	9.63788e-07	0.00015543
CACNG7	6.08408	0.793472	5.0062e-05	0.00462637
SOX1	6.0552	0.783468	7.42022e-05	0.00645281
PTPRZ1	6.02875	0.5509	1.36919e-13	1.25125e-10
SLC6A7	5.95514	0.501534	2.77565e-09	8.01018e-07
RXRG	5.94968	0.442298	3.18409e-19	8.05796e-16
HEPACAM	5.87631	0.403542	1.14102e-07	2.28892e-05
OLIG2	5.82252	0.48987	2.25476e-05	0.00237754
TNR	5.79371	0.485346	0.000449793	0.0279882
C1orf61	5.78123	0.419139	6.30621e-05	0.00562244
MYOZ1	5.77075	0.177728	0.000401384	0.0255914
SCRT1	5.7329	0.378982	4.2037e-10	1.50324e-07
SNAP25	5.67215	0.435362	1.73033e-09	5.22258e-07
SRRM4	5.6483	0.449967	4.82348e-05	0.00450817
LINC00461	5.62468	0.626283	0.000193918	0.0143364
COL20A1	5.57121	0.409441	6.53137e-15	7.16252e-12
XIRP1	5.51994	0.355766	8.60557e-08	1.79187e-05
ETNPPL	5.50601	0.448179	0.000550037	0.0327227
DDN	5.49196	0.308652	1.17471e-10	4.83085e-08
RLBP1	5.46789	0.669811	1.4713e-05	0.0016464
DAW1	5.43812	0.676865	0.000193616	0.0143364
MURC	5.31189	0.233635	0.000271075	0.0187355
OTOR	5.30407	0.617905	2.84177e-07	5.22298e-05
KCND2	5.20437	0.625327	9.3334e-05	0.00775372
RBFOX1	5.15272	0.560232	3.48894e-05	0.0034366
LTF	5.14591	0.267069	4.05298e-05	0.00388744
RALYL	5.1273	0.85878	0.000127337	0.00997443
RP11-359P18.7	5.09379	0.69876	3.70921e-10	1.35588e-07
RFX4	5.05404	0.505652	0.000145036	0.0112802
PKIA	5.01881	0.265834	0.000345789	0.0227522
PLPPR5	5.01764	0.792132	0.000234395	0.0166552
NRK	5.01102	0.574936	6.76032e-13	4.83495e-10
INA	5.00557	0.407043	1.69757e-05	0.00184318
LINGO4	5.00384	0.687129	0.000919983	0.0495039
SNX18P27	5.00355	0.656106	2.2638e-10	8.47511e-08
IGKV1-5	4.99493	0.473491	0.000852789	0.046682
SLC24A2	4.96343	0.525657	1.43371e-08	3.54643e-06
AQP4	4.9524	0.435895	0.000276583	0.0190362
GLRA2	4.89032	0.842646	0.000208743	0.0150933
GFAP	4.85746	0.419441	7.77053e-09	2.06164e-06
SCG3	4.82619	0.319029	0.000160446	0.012333
AMER2	4.79042	0.578936	1.21592e-07	2.40979e-05
STMN4	4.74384	0.473484	0.000686986	0.0396511
CNGA3	4.72658	0.527992	5.62447e-05	0.00512575
RASAL1	4.69479	0.417315	1.54506e-06	0.00023317
KBTBD12	4.69465	0.230861	1.39021e-06	0.000212728
LINC00844	4.69418	0.35044	1.09794e-19	3.0101e-16
TTYH1	4.67767	0.322771	4.58477e-11	2.12443e-08
DAO	4.66726	0.354429	5.98403e-26	9.84343e-22
LAMP5	4.65234	0.334981	2.61148e-28	8.59151e-24
CYP4F44P	4.64933	0.66939	9.87972e-09	2.50025e-06
HHATL	4.63334	0.469917	6.59789e-08	1.40041e-05
DUSP26	4.61059	0.354311	8.4323e-19	1.84943e-15
XKR4	4.60877	0.54191	1.67082e-05	0.00182014
C11orf87	4.60815	0.490637	1.12105e-05	0.00129864
RASGRF1	4.60667	0.260619	0.000410327	0.0259105
AK5	4.60045	0.322507	2.69012e-17	5.20602e-14
CABP1	4.58766	0.285101	2.74562e-06	0.000384398
KCNJ16	4.58133	0.417552	1.54424e-06	0.00023317
MYADML2	4.56857	0.319504	0.00032101	0.0215089
CADM2	4.55068	0.537029	3.40224e-05	0.0033714
FOXJ1	4.52347	0.533015	5.43425e-06	0.000682372
KCNJ10	4.48571	0.320989	2.90104e-13	2.27241e-10
SLC13A5	4.46893	0.497895	8.76222e-05	0.00741049
KLHL34	4.40897	0.619885	0.000874221	0.0476175
RP11-268P4.5	4.38111	0.470532	1.57311e-13	1.39623e-10
RP11-308N19.1	4.37863	0.442846	0.000890036	0.048319
MAS1	4.37417	0.407335	3.27534e-08	7.38051e-06
OLIG1	4.36986	0.377178	0.000188408	0.0140554
RP11-359P18.5	4.31206	0.688497	8.32239e-06	0.000992023
CTC-239J10.1	4.25663	0.633364	2.60607e-05	0.00268768
FAM69C	4.2174	0.42357	1.28331e-06	0.000199149
MGAT5B	4.19449	0.304338	1.10698e-06	0.000174251
CCKAR	4.18865	0.540868	8.04766e-10	2.67434e-07
PDZK1IP1	4.1867	0.314366	8.55432e-25	9.38095e-21
GFRA2	4.17133	0.305374	6.35404e-07	0.000106654
ELAVL4	4.16865	0.278802	2.71133e-13	2.21249e-10
NDP	4.15665	0.475921	1.57481e-07	3.0122e-05
RP5-978I12.1	4.13982	0.611052	5.70565e-08	1.2189e-05
KSR2	4.11999	0.358606	3.68752e-07	6.59325e-05
KCNN1	4.10987	0.306612	2.05009e-16	3.21171e-13
METTL11B	4.09746	0.76649	0.000697546	0.0401199
S100B	4.05822	0.315528	7.47356e-23	4.91745e-19
FAM181B	4.03835	0.34144	0.000371617	0.0240771
VIT	4.03298	0.398024	5.70473e-15	6.47172e-12
L1CAM	4.0223	0.327925	6.09826e-11	2.67502e-08
PRKCQ	4.00722	0.215312	0.000211428	0.0152539
KCNC1	3.99751	0.291734	4.92488e-06	0.000625574
IL31RA	3.98857	0.460116	1.4434e-05	0.0016207
KRT7	3.95543	0.438749	8.65173e-09	2.259e-06
RP11-236B18.2	3.88954	0.41901	1.12187e-12	7.38166e-10
SYT8	3.88702	0.487065	0.00059654	0.0354252
ENHO	3.88046	0.268937	3.92864e-07	6.91167e-05
AC003985.1	3.84917	0.82601	9.06765e-05	0.00761011
CDH20	3.82823	0.359436	1.82772e-05	0.00196504
RP11-359P18.6	3.80556	0.728808	9.25003e-06	0.00108685
ATP10B	3.77393	0.502784	3.44152e-06	0.000471761
ICAM5	3.7172	0.388852	3.57036e-16	5.14921e-13
ALDH1A1	3.71338	0.249205	1.80877e-10	7.00078e-08
RP11-208N14.4	3.71049	0.497441	8.06299e-08	1.68958e-05
FAM57B	3.68994	0.362587	0.000788607	0.0437511
PTX3	3.66537	0.302466	2.04907e-13	1.72852e-10
SCRG1	3.66334	0.329802	1.15478e-11	6.1276e-09
DPYS	3.64382	0.37112	0.000194858	0.0143634
COL10A1	3.62238	0.316639	4.52291e-15	5.51109e-12
GPM6A	3.61923	0.343937	1.77592e-06	0.00026083
ALPK2	3.61921	0.333117	4.65914e-13	3.48366e-10
CTNNA2	3.58851	0.519272	1.34209e-07	2.59726e-05
MYOZ2	3.5741	0.227348	0.000659051	0.0383115
CTD-3247F14.2	3.572	0.454566	2.63451e-05	0.00270853
CHRNA3	3.5491	0.388954	1.30938e-11	6.83766e-09
TMC3	3.51513	0.369336	2.10853e-12	1.2846e-09
FRMPD3	3.50878	0.285027	5.98108e-06	0.000742534
STX1B	3.50353	0.23503	3.66517e-06	0.000490164
RP11-401P9.6	3.47963	0.314655	2.33111e-05	0.0024424
HPR	3.47828	0.400588	1.3595e-10	5.3887e-08
LAMP5-AS1	3.45631	0.547081	3.0496e-06	0.000423328
MME	3.3757	0.34526	1.37368e-12	8.69089e-10
LINC00958	3.37378	0.534865	0.000682061	0.0394361
TESPA1	3.37332	0.214276	0.000861395	0.0469968
ROBO2	3.36524	0.359171	1.03406e-11	5.57698e-09
RGS6	3.36409	0.289883	8.2294e-17	1.41808e-13
KLHDC8A	3.3528	0.335757	0.000606145	0.0359308
C2orf72	3.30057	0.343744	6.79229e-05	0.00595892
WI2-1896O14.1	3.2952	0.23259	0.000245701	0.0172352
KCNE5	3.29493	0.357058	4.06753e-05	0.00389005
LRRTM1	3.28495	0.538149	0.000314284	0.0212313
LINC01447	3.27395	0.457937	7.31825e-07	0.000119783
RP11-401P9.4	3.27201	0.239126	4.98456e-22	2.04984e-18
RP11-265N7.1	3.2682	0.433493	2.22821e-08	5.12628e-06
GREM1	3.26632	0.458216	1.6441e-07	3.12655e-05
KRT17P1	3.25178	0.599233	3.94652e-05	0.00383606
TNC	3.24347	0.312325	1.61271e-13	1.39623e-10
ADD2	3.23654	0.295946	1.61942e-08	3.87426e-06
FGF7	3.23264	0.337102	8.23678e-12	4.59291e-09
SPOCK3	3.22936	0.475126	9.28411e-05	0.00775223
FXYD7	3.21956	0.268426	3.22458e-17	5.89363e-14
RIMS2	3.20962	0.465074	0.00017796	0.0134901
BHLHE22	3.20821	0.352263	8.96606e-05	0.0075441
B3GAT1	3.20773	0.306162	0.000200947	0.0147238
RFPL4A	3.18284	0.709194	0.000669869	0.0388677
RP11-436K8.1	3.18087	0.478482	0.000477276	0.0293493
NKD1	3.17033	0.225637	1.61869e-22	8.87554e-19
BX255923.3	3.16082	0.474101	0.000716246	0.0408384
TMEM8C	3.15794	0.530785	1.1817e-05	0.00136409
RORB	3.14613	0.39691	3.74278e-06	0.000496506
CXCL14	3.14525	0.294918	0.000479302	0.029419
RP11-84D1.1	3.14262	0.477718	4.1235e-06	0.000542652
PRKCQ-AS1	3.13274	0.233701	0.000767746	0.0427887
TMEM130	3.11991	0.339776	1.04105e-10	4.33539e-08
ANKRD33	3.10898	0.473022	2.19941e-06	0.000317361
RP11-767I20.1	3.10292	0.357831	9.62317e-10	3.10385e-07
PPP2R2B	3.10217	0.302414	8.68734e-13	6.04365e-10
TLX1	3.09459	0.497699	5.73435e-06	0.000717318
MAL	3.0797	0.413688	2.49956e-05	0.00260231
TLX2	3.07481	0.536994	0.000643118	0.0375807
LMCD1	3.06735	0.209593	1.47017e-23	1.20918e-19
RP11-536I6.2	3.06609	0.476241	3.32703e-06	0.000457975
BSPRY	3.0635	0.320642	0.000825958	0.0454401
RP11-344F13.1	3.06287	0.451307	1.71679e-06	0.000254417
CALN1	3.05736	0.387018	2.79383e-05	0.00284564
PLXNB3	3.05308	0.275388	0.00027575	0.0190186
SHD	3.0524	0.4191	0.00017998	0.0135945
TMEM63C	3.05175	0.288506	3.69511e-06	0.000492167
NWD1	3.03953	0.284752	2.14817e-05	0.00227243
CNTN2	3.0287	0.295158	0.000109111	0.00888529
KIF1A	3.0285	0.336748	4.09768e-10	1.48142e-07
RP11-798K3.2	3.02041	0.361227	0.000285798	0.0196294
DRD2	3.01887	0.28547	3.61604e-13	2.76661e-10
AQP6	3.00903	0.305614	0.000450037	0.0279882
NPFFR1	3.00165	0.337331	6.56594e-05	0.00579123
DLX1	2.99209	0.393417	4.82267e-09	1.32218e-06
LINC00632	2.98117	0.450965	0.000128749	0.0100611
ERMN	2.96369	0.213713	0.000709842	0.0406141
NTM	2.96258	0.307406	4.20422e-11	1.97592e-08
RP11-362K2.2	2.95923	0.458257	4.14011e-06	0.000542652
INMT	2.95739	0.302449	2.38916e-11	1.1559e-08
TFAP2C	2.95693	0.391348	0.000354509	0.0231869
LINC01474	2.9549	0.537708	0.000195157	0.0143634
RASGEF1A	2.92895	0.227037	4.31088e-06	0.000558361
NPTX2	2.92698	0.351532	0.000338842	0.0224985
KCNJ3	2.91495	0.407396	5.60764e-07	9.4608e-05
RP11-83M16.5	2.91191	0.393927	2.88343e-07	5.27011e-05
RP1-111D6.3	2.90722	0.442725	1.91815e-06	0.00027924
GJB3	2.89566	0.450576	0.000766576	0.0427887
PHF24	2.89463	0.242671	1.73047e-06	0.000255295
DTNA	2.89409	0.226394	6.97988e-12	4.02862e-09
PLA2G5	2.89096	0.364456	4.70365e-08	1.0248e-05
GCK	2.86487	0.342833	1.30948e-08	3.26367e-06
TMPRSS3	2.8474	0.419309	4.19863e-06	0.000548138
TRIM9	2.83865	0.276975	7.94249e-12	4.50517e-09
HKDC1	2.83819	0.316494	9.57622e-06	0.00112117
AC009410.1	2.83368	0.429723	2.18003e-06	0.00031595
LINC01114	2.81193	0.32283	4.71768e-09	1.31531e-06
FOXG1	2.80386	0.543617	0.000203139	0.0148513
C1orf95	2.77499	0.247368	8.42662e-07	0.000137241
PSD	2.77424	0.260929	1.37251e-05	0.0015517
DKK1	2.74471	0.293497	0.000636077	0.0373018
ACSL6	2.74462	0.280782	0.00049625	0.0302897
GRIA1	2.74434	0.41339	5.95115e-06	0.000741617
TLX1NB	2.73656	0.593892	0.000751238	0.0422593
LINC01561	2.73199	0.397151	3.07663e-06	0.000425286
AGAP2	2.71603	0.206217	1.2665e-08	3.18066e-06
BBOX1	2.71477	0.297221	0.000420929	0.026529
RP11-401P9.7	2.69899	0.297253	2.65991e-09	7.81323e-07
CRYM	2.68998	0.32065	3.47973e-08	7.78774e-06
LINC01554	2.68769	0.222247	7.34168e-15	7.79141e-12
PCDH7	2.67732	0.362543	4.0026e-05	0.00385042
CD38	2.67552	0.215594	1.62512e-08	3.87426e-06
CTD-2033D15.2	2.67361	0.382096	2.91981e-06	0.000407028
PLCH2	2.66694	0.286055	2.37285e-05	0.00247823
SYN2	2.65965	0.268897	0.000409346	0.0258982
PAX2	2.65789	0.54268	0.000518244	0.0313414
RASD1	2.65267	0.265274	1.00123e-10	4.223e-08
SLC12A1	2.64841	0.329489	1.45107e-07	2.79173e-05
EXTL1	2.64724	0.248628	9.16674e-12	5.02628e-09
LINC01589	2.6371	0.342334	4.62349e-07	8.00569e-05
GALNT8	2.63551	0.263378	1.38916e-10	5.4407e-08
INMT-FAM188B	2.62621	0.395663	7.13589e-06	0.000866287
CCDC190	2.61787	0.409118	4.13188e-06	0.000542652
SCN8A	2.61489	0.222593	0.000527747	0.0316831
PIGR	2.61205	0.302768	2.63244e-08	6.01421e-06
FABP7	2.60447	0.506747	0.000343676	0.0226585
ADORA1	2.59777	0.288333	7.91918e-09	2.08427e-06
RP11-958F21.1	2.59371	0.387343	8.18071e-06	0.000978681
GREM2	2.5889	0.400981	1.86418e-05	0.00199771
SYT7	2.58337	0.317352	7.74215e-05	0.00668527
CD19	2.58014	0.250374	7.4434e-11	3.22211e-08
CYP4F34P	2.57765	0.403665	2.32981e-05	0.0024424
RHOBTB3	2.57468	0.220875	2.75729e-13	2.21249e-10
TRAC	2.56788	0.211889	0.000242292	0.0171423
SHC3	2.56513	0.216746	7.45332e-05	0.00645281
FAM189A1	2.56383	0.299177	4.52576e-08	9.9262e-06
NNMT	2.55614	0.26571	1.27998e-09	4.04903e-07
CCDC175	2.55124	0.461639	0.000206317	0.0149837
PDE1C	2.54042	0.258475	6.87484e-10	2.33171e-07
RP11-314B1.2	2.53678	0.606253	0.000920891	0.0495039
TRAV14DV4	2.53259	0.398596	4.65647e-05	0.00436448
FAM180B	2.53114	0.307812	1.74791e-07	3.30485e-05
NFIA-AS2	2.52992	0.262298	0.000659118	0.0383115
RP11-627G23.1	2.52439	0.424865	8.21426e-05	0.00703752
CTA-481E9.4	2.52062	0.406271	0.000114645	0.00922179
FHOD3	2.52044	0.330009	4.6515e-07	8.01203e-05
RP11-449D8.5	2.51626	0.448245	0.000189566	0.014078
HPD	2.50093	0.277912	1.71431e-08	4.04472e-06
RIIAD1	2.49595	0.303692	2.02667e-07	3.81003e-05
RP11-401P9.5	2.48847	0.282432	3.72255e-08	8.21935e-06
RP3-467K16.7	2.47769	0.373733	2.36726e-11	1.1559e-08
ASPHD1	2.47704	0.285623	0.000339198	0.0224985
UNQ6494	2.47494	0.440384	0.000186134	0.0139173
RP5-1031J8.1	2.4723	0.419286	0.000113555	0.00917899
KIF26B	2.47214	0.266807	9.55188e-09	2.43603e-06
HMX1	2.46859	0.34428	5.00227e-06	0.000630535
AC110781.3	2.44414	0.422003	0.00018025	0.0135945
CTB-60B18.10	2.42168	0.378324	4.26978e-05	0.00404817
RTP1	2.4216	0.339175	7.45587e-06	0.000901804
GCKR	2.42147	0.452677	0.000484635	0.0296909
DLGAP3	2.42098	0.214068	0.000291791	0.0199163
RPL23AP56	2.40399	0.43571	0.000343471	0.0226585
ECHDC3	2.40306	0.204661	2.03619e-12	1.26394e-09
RTN1	2.39831	0.197367	4.91558e-05	0.0045683
SEMA7A	2.39035	0.228885	3.57816e-10	1.32267e-07
LRRC10B	2.36599	0.299435	1.37145e-06	0.000210838
SLC18A1	2.3626	0.315075	4.35455e-06	0.000561805
NAV3	2.36236	0.270128	1.30404e-07	2.55366e-05
PLP1	2.36101	0.304641	1.32961e-09	4.16598e-07
GLRB	2.3589	0.357824	4.00269e-05	0.00385042
LRRTM2	2.34297	0.248254	1.83987e-08	4.29291e-06
TMEM59L	2.34259	0.277874	3.86803e-07	6.84163e-05
MCHR1	2.30836	0.436865	0.000725385	0.0411456
THBS1	2.30375	0.300772	4.22765e-06	0.000549745
FAM92B	2.30344	0.389379	0.000257236	0.0179677
XG	2.30115	0.351531	5.39548e-05	0.00494445
RP11-159N11.3	2.2955	0.41572	0.000404652	0.0257001
RP11-266O8.1	2.28783	0.389882	0.000265199	0.0184067
GOLGA7B	2.28533	0.267931	7.08754e-05	0.00618496
DTHD1	2.27872	0.330015	3.01361e-05	0.00303195
ST8SIA1	2.2756	0.304562	8.13943e-06	0.000977296
ORM2	2.26455	0.348441	0.000120659	0.00951931
MAP2	2.24274	0.236653	0.000923589	0.0495679
STAT4	2.23054	0.192637	5.13149e-11	2.34473e-08
RFPL4B	2.22044	0.346322	0.000117272	0.00931919
RP5-1125N11.2	2.21659	0.342984	0.000115189	0.00922377
TRIM67	2.2164	0.272851	2.51396e-06	0.000356495
FCER1A	2.21296	0.265758	1.51452e-06	0.000230677
RP11-20J15.3	2.21213	0.403529	0.000790865	0.0438025
PKD1L2	2.20766	0.423388	0.000824457	0.0454335
RP11-946P6.4	2.20669	0.373821	0.000329884	0.0220586
AC004221.2	2.19052	0.366529	0.000350255	0.0229543
RP11-617F23.1	2.18901	0.160271	2.35311e-06	0.000335129
PRG4	2.18446	0.379143	0.0005163	0.0312813
MASP1	2.18099	0.256414	1.26473e-06	0.000197196
CCL21	2.18084	0.379474	0.000506759	0.0307599
AC016735.2	2.17956	0.292006	1.52875e-05	0.00169914
CTD-2154I11.2	2.17927	0.22639	5.11599e-08	1.10731e-05
GLIS3	2.17777	0.210583	5.48989e-09	1.49266e-06
RP11-49G2.3	2.17666	0.378482	0.000535697	0.0320434
DAAM2	2.1662	0.177443	1.55442e-11	7.86753e-09
MYBPH	2.16082	0.335516	0.000155432	0.0120319
ICOS	2.14209	0.250652	1.62436e-06	0.000244018
LINC01529	2.12988	0.326472	0.000157398	0.0121555
RBM20	2.12619	0.23392	4.84958e-07	8.3097e-05
FAP	2.11525	0.305987	8.24195e-05	0.0070429
PID1	2.11475	0.189762	1.38979e-09	4.27315e-07
ITGA8	2.09976	0.281989	3.03623e-05	0.0030454
LINC00944	2.09888	0.371407	0.000918297	0.0495039
DNAJC5G	2.09509	0.37175	0.000927044	0.0496724
MT1F	2.09441	0.258767	6.07339e-06	0.000749017
SAMD5	2.08929	0.288735	5.06273e-05	0.00466551
CYP4F35P	2.08655	0.362856	0.000827569	0.0454528
ROR2	2.08391	0.31407	0.000175639	0.0133758
RP11-231P20.2	2.08163	0.333807	0.000319021	0.0214194
ST18	2.08107	0.299382	9.62693e-05	0.0079577
CTA-268H5.14	2.07843	0.341274	0.000371779	0.0240771
LINC00565	2.07592	0.226675	6.77364e-07	0.000112549
RYR3	2.07038	0.281352	4.51501e-05	0.00425614
PROM1	2.0637	0.335171	0.000466431	0.0287901
ARTN	2.06063	0.276947	3.95277e-05	0.00383606
ADGRB3	2.05578	0.280173	0.000759927	0.0425909
THRB	2.05215	0.183171	3.03916e-09	8.69438e-07
TTPA	2.04529	0.348614	0.000532586	0.0319154
PODNL1	2.03839	0.229011	1.91824e-06	0.00027924
GPR68	2.03607	0.18625	8.79794e-09	2.27908e-06
KAZALD1	2.0266	0.260482	2.67201e-05	0.00273851
GZMK	2.02056	0.242739	8.70765e-06	0.0010342
GPR55	2.01851	0.233606	4.40079e-06	0.000565553
INHBA	2.01111	0.233337	4.95855e-06	0.000627428
RP11-923I11.6	2.01054	0.252137	2.00372e-05	0.00213335
PON3	2.01008	0.393917	6.35359e-06	0.00077995
TAL1	2.0094	0.208072	4.20183e-07	7.31407e-05
LINC00544	2.00882	0.326559	0.000675355	0.0391171
RP11-236B18.5	2.00204	0.267342	5.75829e-05	0.00521878
SATB1-AS1	2.00196	0.312233	0.000423559	0.0266437
SPOCK1	2.00064	0.314441	1.55283e-18	3.19291e-15
FGF22	1.99825	0.277472	0.000103269	0.00845137
TAS1R1	1.99539	0.254218	2.80639e-05	0.00284922
GPR62	1.99396	0.291966	0.000212693	0.0153115
GATA6-AS1	1.99017	0.306521	0.000402688	0.0256248
RP3-525N10.2	1.98771	0.29048	0.000221571	0.0158123
EVA1A	1.98388	0.285688	0.000184298	0.0138114
HSD17B6	1.98374	0.242173	1.6486e-05	0.00181396
HSPD1P11	1.97997	0.318365	0.000705934	0.0404608
HSPA12A	1.97971	0.173366	5.62678e-09	1.51734e-06
RP11-209D14.2	1.97896	0.307499	0.000462301	0.0285888
KCNK10	1.97762	0.318527	0.000698779	0.0401206
RASGEF1C	1.96848	0.292927	0.000316099	0.0212665
APOA1	1.9653	0.31279	0.000658726	0.0383115
RP4-758J18.7	1.96376	0.293131	0.000335659	0.0223539
CTD-2240J17.1	1.96321	0.316351	0.00076866	0.0427887
IL32	1.95748	0.214197	2.71568e-06	0.000383447
ENTPD3	1.95163	0.232951	1.52229e-05	0.00169769
SFRP4	1.94627	0.310479	0.000757721	0.0425397
RGN	1.93986	0.309364	0.000766954	0.0427887
CTHRC1	1.93376	0.217241	6.07883e-06	0.000749017
RP5-826L7.1	1.93257	0.225751	1.18612e-05	0.00136441
PLPP7	1.92902	0.3038	0.000746407	0.0421201
MIR3142HG	1.92425	0.189084	3.84834e-07	6.84163e-05
CTD-2515H24.2	1.92179	0.237751	3.65537e-05	0.00358979
OXTR	1.92138	0.279149	0.000331112	0.0220959
P2RY10	1.92	0.253881	0.000102024	0.00837029
SNCG	1.91466	0.24377	6.16164e-05	0.00552348
GZMA	1.90816	0.205254	3.45731e-06	0.000471959
CD8A	1.90123	0.215365	1.03221e-05	0.00120421
CD3D	1.89621	0.206358	6.42076e-06	0.000785267
ANKRD22	1.89557	0.233179	4.40858e-05	0.00416775
CXCR6	1.8916	0.214814	1.20297e-05	0.00137897
XCR1	1.89009	0.292879	0.000809561	0.0446875
IGFL4	1.88761	0.24999	0.000139433	0.0108702
DHRS9	1.88698	0.227489	3.43532e-05	0.00339395
MMP17	1.87968	0.245554	0.000121326	0.00954904
ZNF831	1.87209	0.249279	0.000169869	0.0129965
SPON2	1.86304	0.313488	1.04697e-05	0.00121711
AIM1	1.85962	0.166257	8.90795e-08	1.84316e-05
CTLA4	1.85795	0.254685	0.00027073	0.0187355
SCN7A	1.85313	0.436964	3.24448e-05	0.00322477
DIO2	1.83621	0.258767	0.00044856	0.0279882
RCN3	1.83516	0.204346	1.66342e-05	0.0018181
TMEM71	1.82452	0.160449	1.08634e-07	2.19261e-05
TMIE	1.81482	0.232159	0.000164859	0.0126426
KCNIP3	1.80831	0.257508	0.000628453	0.0369865
RUNX2	1.80515	0.204226	3.11392e-05	0.00311383
CTD-3116E22.8	1.80419	0.22318	0.000119849	0.00947816
RP1-244F24.1	1.80411	0.233384	0.000216764	0.0155392
TRBC1	1.79587	0.20443	3.84137e-05	0.00375006
CDH6	1.79016	0.209918	6.47095e-05	0.00572279
ANKRD65	1.78885	0.216194	0.000101057	0.00831169
SNAI1	1.77604	0.224351	0.000208553	0.0150933
DDO	1.76742	0.198458	4.26553e-05	0.00404817
RP4-621B10.8	1.76416	0.212372	0.000121774	0.00956143
SLC14A2	1.75778	0.243345	0.000717509	0.0408397
SH2D1A	1.75526	0.229719	0.000393689	0.0252475
OLFM2	1.74354	0.22203	0.000315393	0.0212625
CD8B	1.73994	0.235102	0.000642779	0.0375807
TIGIT	1.73828	0.230574	0.000539991	0.0322417
AQP1	1.73816	0.224679	0.000398302	0.0254936
PDCD1LG2	1.72594	0.191679	6.19451e-05	0.00553786
CGNL1	1.72142	0.19254	7.43493e-05	0.00645281
SPATA9	1.71685	0.1944	9.20463e-05	0.00770542
COL9A2	1.71514	0.191862	8.00936e-05	0.0068799
FASLG	1.71453	0.229353	0.00073931	0.0418633
CRTAM	1.71296	0.195691	0.000110256	0.00895629
TNFAIP6	1.69747	0.315316	2.58178e-05	0.00267101
RP11-305L7.3	1.68984	0.224727	0.000854595	0.0467032
TTC39C	1.67792	0.141368	7.06726e-07	0.000116837
CD2	1.67684	0.197786	0.000261339	0.0181771
TMEM119	1.67569	0.206038	0.000439433	0.0275369
TSPAN7	1.67453	0.193409	0.000199801	0.0146725
BMP8B	1.665	0.182548	0.000116714	0.0092973
PIPOX	1.66216	0.14198	1.36536e-06	0.000210838
IKZF3	1.65971	0.206963	0.000608618	0.0360125
SKAP1	1.65593	0.19285	0.000287341	0.0196942
CTC-251I16.1	1.65451	0.164186	2.94902e-05	0.00297607
RP11-472N13.3	1.65291	0.183286	0.000158096	0.0121808
TRBC2	1.63987	0.195447	0.000453874	0.0281736
SIT1	1.63655	0.205458	0.000838445	0.0459733
IFITM10	1.63261	0.186733	0.000309041	0.0209631
RUNX3	1.62873	0.182597	0.00025474	0.0178313
FNDC4	1.59101	0.179354	0.000446686	0.0279383
PSRC1	1.57471	0.148107	4.90384e-05	0.0045683
GRIA4	1.56506	0.350717	2.09755e-05	0.00222605
CD180	1.56359	0.18137	0.000877983	0.0477434
RP11-715H19.2	1.4232	0.431348	7.7784e-05	0.00669899
ADAMTS6	1.30929	0.237588	6.90223e-05	0.00603927
TNNT1	1.15234	0.417127	0.00031013	0.0209938
ST6GALNAC1	-1.03081	0.288246	4.94906e-13	3.6182e-10
RP11-236J17.6	-1.18506	0.551433	1.747e-05	0.00188441
HLA-V	-1.31769	0.315851	0.000218069	0.0155962
RP11-526F3.1	-1.36292	0.476128	8.80644e-05	0.0074288
CYP4F3	-1.41531	0.304821	5.02553e-07	8.52241e-05
OTOG	-1.43917	0.399408	9.35462e-05	0.00775372
GABRQ	-1.4401	0.344787	8.37766e-05	0.00714033
GADL1	-1.44226	0.431909	3.59986e-16	5.14921e-13
CALML5	-1.45409	0.750623	0.000900182	0.048709
FUT9	-1.47734	0.701941	3.56171e-06	0.000484201
MGAT3	-1.51969	0.150073	0.00024498	0.0172352
DLGAP1-AS5	-1.5714	0.845533	0.000261081	0.0181771
ADRB1	-1.57461	0.178217	0.000525467	0.0316418
QRFPR	-1.58362	0.453869	1.75426e-15	2.30854e-12
CHST9	-1.61182	0.392302	6.41932e-05	0.00569244
LINC00472	-1.62112	0.184211	0.00029803	0.0203
SCGN	-1.62812	0.349048	0.000491922	0.0300813
KCNH5	-1.63584	0.657567	5.95353e-05	0.00536617
OCLN	-1.6632	0.201796	0.000376628	0.0242955
EHF	-1.69565	0.222499	0.000617786	0.0364239
LINC00371	-1.71486	0.380551	2.81466e-05	0.00284922
NTSR1	-1.72003	0.307618	1.37007e-09	4.25224e-07
LINC01482	-1.72747	0.227693	0.00047684	0.0293493
PRODH	-1.7323	0.226183	0.000428683	0.0269146
SPTLC3	-1.76463	0.189529	1.90251e-05	0.00203216
SLC26A2	-1.78155	0.257211	0.000741864	0.0419357
RP11-221N13.3	-1.85153	0.281681	0.000724535	0.0411456
ITGB4	-1.85529	0.212454	1.62303e-05	0.00179182
AC010872.1	-1.8583	0.264988	0.000358817	0.0234221
DIRAS2	-1.86282	0.258348	0.000245436	0.0172352
ITIH2	-1.87321	0.276051	0.000399255	0.025505
DCDC2C	-1.87684	0.250823	0.000145928	0.0113228
KRT16	-1.88333	0.416875	4.45369e-09	1.25233e-06
MTMR7	-1.88694	0.198206	2.2857e-06	0.000328372
EYS	-1.89033	0.264905	0.000225238	0.0160392
GAS2	-1.91925	0.248643	6.01341e-05	0.00540533
GABRB2	-1.92345	0.288975	0.000374078	0.0241784
RP4-718P11.1	-1.9447	0.304587	0.000526097	0.0316418
PLCXD2	-1.97634	0.331561	0.000795226	0.04397
HES7	-1.9778	0.261806	4.99599e-05	0.00462637
HAS1	-1.97937	0.433192	0.000113884	0.00918299
SLC22A8	-2.0046	0.424671	1.02089e-06	0.00016369
B3GNT8	-2.01194	0.24887	1.22653e-05	0.00139625
FATE1	-2.04287	0.361368	0.000905747	0.0489297
SLC6A13	-2.05609	0.299214	9.9323e-05	0.00818954
RELN	-2.05944	0.457584	1.0896e-06	0.00017234
SERPIND1	-2.07147	0.267706	1.58114e-05	0.00175145
ZNF385B	-2.0871	0.327141	0.000204505	0.014918
RP13-714J12.1	-2.09168	0.306982	8.70395e-05	0.00738018
MISP	-2.0964	0.287644	3.21927e-05	0.00320942
IL12A	-2.105	0.216317	8.01414e-08	1.68958e-05
CPAMD8	-2.10512	0.229907	3.08968e-07	5.61588e-05
APOD	-2.11105	0.350315	8.52695e-07	0.000138191
CYP4F23P	-2.13712	0.327256	0.000116056	0.00926727
SSTR2	-2.16281	0.222221	3.13248e-08	7.10728e-06
RP11-305P14.1	-2.16441	0.407133	0.000892689	0.0483832
ALLC	-2.17873	0.263203	1.65457e-06	0.000246306
SNTG1	-2.20223	0.535188	5.1308e-05	0.00471503
PCSK9	-2.21323	0.324962	3.8365e-05	0.00375006
MUC4	-2.21456	0.350854	0.000107718	0.00879362
CTD-2207P18.1	-2.22225	0.241416	9.1412e-08	1.8796e-05
CHMP4C	-2.23853	0.288131	3.65656e-06	0.000490164
TBPL2	-2.25949	0.421887	0.000751441	0.0422593
SLC6A12	-2.26178	0.305388	0.000456702	0.0282957
MIR3907	-2.27208	0.298926	4.7423e-06	0.00060707
CTC-490G23.2	-2.27547	0.405229	0.000305894	0.0207926
RP11-804N13.1	-2.3076	0.404266	0.000242282	0.0171423
LINC00661	-2.30833	0.577631	1.29456e-05	0.00146861
C17orf99	-2.31582	0.288168	1.02496e-06	0.00016369
AC060834.2	-2.33144	0.30684	2.74579e-06	0.000384398
FOXI2	-2.3556	0.396658	0.000111703	0.00905148
GCNT2	-2.36065	0.227598	4.33286e-10	1.51818e-07
FTCD-AS1	-2.36111	0.574454	2.68678e-07	4.96587e-05
BARX1	-2.37257	0.425013	0.000347957	0.0228492
PRMT8	-2.37476	0.296368	6.51605e-07	0.000108818
FAM162B	-2.38341	0.347386	3.55801e-09	1.0091e-06
TF	-2.39021	0.440471	5.6132e-10	1.92363e-07
P2RX5	-2.39127	0.288413	2.57571e-07	4.78748e-05
RNGTTP1	-2.39901	0.346904	1.40895e-05	0.00158744
DCAF12L2	-2.40784	0.385864	4.55168e-05	0.00427845
NDST4	-2.41488	0.721087	0.000380933	0.0245251
KLHL14	-2.42824	0.287715	1.29176e-07	2.54476e-05
CALML3-AS1	-2.43567	0.268799	1.72121e-08	4.04472e-06
APCDD1	-2.44034	0.277108	3.57307e-08	7.9426e-06
TP53I11	-2.44164	0.151573	3.51967e-22	1.65419e-18
RP11-65F13.3	-2.44928	0.319301	1.05711e-06	0.000168009
RP11-368L12.1	-2.47627	0.451421	0.000205403	0.0149503
GLP1R	-2.49596	0.417305	5.43444e-05	0.00496632
HMSD	-2.52023	0.359055	3.65649e-06	0.000490164
GSTA9P	-2.5446	0.502112	0.00034026	0.0225236
GJB6	-2.66389	0.28693	1.01649e-09	3.24675e-07
RP11-307F22.2	-2.66716	0.415227	9.20928e-06	0.00108594
UPK1B	-2.66784	0.396386	3.59476e-06	0.000486683
DEFB1	-2.67168	0.403404	4.82575e-06	0.000615358
PLA2G3	-2.67308	0.316673	1.89698e-08	4.39498e-06
LINC00593	-2.69651	0.57504	0.000385731	0.0247855
ABCB1	-2.71392	0.283552	2.26697e-10	8.47511e-08
MYO3A	-2.71754	0.294694	8.33851e-10	2.71612e-07
FSTL4	-2.78289	0.382679	4.13008e-07	7.22743e-05
KCNJ13	-2.78809	0.50625	0.000614115	0.0362725
RP11-856M7.6	-2.79045	0.487561	2.7903e-05	0.00284564
AC116614.1	-2.79081	0.323969	4.80099e-09	1.32218e-06
PROKR1	-2.79331	0.417918	2.32271e-06	0.000332238
HCG22	-2.81655	0.296423	1.25205e-10	5.02333e-08
MYO1A	-2.8176	0.243795	1.3064e-14	1.3024e-11
GCOM1	-2.83791	0.346532	1.57782e-08	3.84508e-06
RP11-815J4.5	-2.93856	0.429477	7.17306e-07	0.000117993
VWA5B1	-2.97265	0.326905	2.03622e-10	7.78948e-08
S100P	-3.03188	0.343064	0.000189554	0.014078
ST8SIA6	-3.03193	0.305489	3.57262e-12	2.13701e-09
RPRM	-3.03524	0.414002	1.00474e-07	2.04043e-05
EDN2	-3.10903	0.342896	8.75113e-11	3.739e-08
SPRR2F	-3.14517	0.811139	2.34946e-11	1.1559e-08
ILDR2	-3.14765	0.34444	5.3123e-11	2.3941e-08
CTC-552D5.1	-3.19213	0.740445	0.000713881	0.0407743
SLC26A7	-3.19859	0.388604	1.61025e-09	4.90514e-07
RP11-693N9.1	-3.31304	0.700692	0.000548014	0.0326615
SNTG2	-3.33997	0.314903	1.0769e-14	1.10715e-11
CTB-49A3.2	-3.34335	0.560512	1.64722e-06	0.000246306
ECEL1	-3.34345	0.397293	1.17624e-12	7.58764e-10
AC012123.1	-3.36386	0.368705	1.35665e-11	6.97383e-09
KLK12	-3.48219	0.707208	0.000498827	0.0303906
RP11-453M23.1	-3.55345	0.532256	1.3248e-07	2.57897e-05
CTD-3233P19.7	-3.57337	0.515137	1.60099e-08	3.87286e-06
GPRC6A	-3.61566	0.569515	3.5709e-07	6.41962e-05
TAC3	-3.70082	0.393405	3.19952e-07	5.78357e-05
ABCC13	-3.7946	0.520896	6.82509e-09	1.82552e-06
SDHDP1	-3.8157	0.415592	8.81775e-13	6.04365e-10
HEPACAM2	-3.92823	0.389802	5.53689e-12	3.25282e-09
SERPINB10	-3.98795	0.412776	3.41117e-14	3.3007e-11
RNU6-324P	-4.02866	0.633291	9.95115e-08	2.03343e-05
CTSE	-4.14578	0.511528	1.5041e-08	3.69279e-06
RP11-64C12.3	-4.16926	0.468787	9.18764e-13	6.16866e-10
RP11-64C12.4	-4.19808	0.872314	0.000522626	0.0315484
RP11-64C12.5	-4.29035	0.760957	1.21801e-05	0.00139137
ANKRD62	-4.29307	0.436682	2.81744e-15	3.56504e-12
WNT16	-4.3031	0.540352	2.49685e-09	7.40034e-07
FER1L6	-4.34994	0.417521	5.48295e-10	1.89877e-07
KLK11	-4.71445	0.477008	4.35083e-16	5.96409e-13
RNA5-8S5	-7.81293	1.08773	5.79077e-05	0.00523381

## Sheet: Hypermitotic
Gene	log2FoldChange	lfcSE	pvalue	padj
SPRR2A	6.89023	0.977559	2.57e-08	2.25e-06
SCGB2A1	6.41826	0.996293	1.56e-07	1.13e-05
SPRR2D	5.38354	0.741878	5.94e-05	0.00184454
SERPINA11	4.67903	0.505541	1.89e-06	9.97e-05
CTSE	4.49747	0.450532	1.08e-19	8.65e-17
WNT16	4.48964	0.483653	2.51e-17	1.6e-14
PRB4	4.37322	0.786849	0.00182573	0.0317717
ILDR2	4.36689	0.264746	4.1e-49	6.54e-45
GALR1	4.32156	0.340773	6.54e-17	3.94e-14
SPRR2F	4.15458	0.740319	1.07e-07	8.15e-06
TUBA4B	3.9367	0.36632	9.59e-22	1.13e-18
SYT10	3.93341	0.46612	1.44e-11	2.9e-09
S100P	3.91387	0.345488	7.26e-24	1.1e-20
BMP3	3.79067	0.520575	1.72e-06	9.2e-05
TBATA	3.73941	0.605955	9.7e-08	7.49e-06
DEFB1	3.73065	0.337723	1.62e-22	2.06e-19
RP11-438D14.2	3.70082	0.689329	0.000114964	0.00319231
SPRR3	3.62268	0.799055	4.39e-08	3.64e-06
FOXI2	3.47972	0.323712	5.08e-21	5.23e-18
SLC26A7	3.46286	0.34635	1.78e-18	1.27e-15
DLGAP1-AS5	3.39883	0.625735	1.96e-10	2.93e-08
HAS1	3.38321	0.410062	2.43e-19	1.89e-16
QRFPR	3.35024	0.345091	1.34e-42	1.07e-38
MTCO3P12	3.3033	0.229951	7.19e-06	0.000309875
AQP3	3.28217	0.306582	1.72e-20	1.63e-17
FAM162B	3.24729	0.304154	2.54e-20	2.25e-17
RFX6	3.24159	0.529145	3.28e-08	2.79e-06
LRRC31	3.13864	0.286955	5.76e-21	5.75e-18
SNTG2	3.06442	0.283973	2.53e-20	2.25e-17
TF	3.05665	0.40718	5.07e-11	8.61e-09
AC114808.2	3.05447	0.442173	2.3e-09	2.65e-07
MAEL	3.00395	0.288798	6.47e-19	4.7e-16
FER1L6	2.99825	0.433812	1.2e-09	1.48e-07
RP1-32I10.11	2.97996	0.551392	1.58e-06	8.65e-05
FAM159B	2.96338	0.468259	1.03e-05	0.00041709
AKR1B10P1	2.92641	0.342776	3.08e-29	9.82e-26
LINC01330	2.90355	0.43646	0.00218459	0.0368907
RP1-272L16.1	2.88536	0.592271	1.25e-07	9.34e-06
MUC3A	2.87653	0.305458	1.1e-15	5.31e-13
APOD	2.85003	0.356205	6.4e-12	1.35e-09
SBK2	2.84965	0.720598	0.00142165	0.0260457
GADL1	2.80103	0.407439	2.3e-09	2.65e-07
RP11-1090M7.1	2.7646	0.508189	0.000861537	0.0169929
AKR1B10	2.76447	0.310339	2.28e-32	1.21e-28
GSTA9P	2.74614	0.416826	9.65e-09	9.57e-07
GCOM1	2.71918	0.312363	1.88e-13	5.72e-11
PCSK9	2.70709	0.283337	1.04e-15	5.13e-13
RP11-404G16.2	2.69164	0.614723	4.86e-05	0.00156024
TPO	2.69074	0.271291	9.33e-17	5.41e-14
RPRM	2.68053	0.388831	3.51e-09	3.95e-07
SCGN	2.66711	0.300896	9.06e-14	2.92e-11
MTUS2	2.6641	0.307345	3.37e-13	9.28e-11
AGBL1-AS1	2.66051	0.555455	6.87e-05	0.00208205
ADAMTS19	2.64838	0.386125	3.88e-09	4.29e-07
APCDD1	2.64475	0.245371	3.67e-19	2.79e-16
PRR35	2.63052	0.483566	1.51e-06	8.36e-05
CHODL	2.60904	0.324945	2.62e-16	1.42e-13
FUT9	2.59494	0.596489	5.95e-05	0.0018468
LMX1A	2.59294	0.400607	2.57e-08	2.25e-06
RP11-438D14.3	2.55953	0.560221	1.99e-05	0.000736417
AC012501.3	2.55059	0.567735	7.17e-05	0.00216292
NPY1R	2.54762	0.265082	1.8e-15	8.32e-13
HHIPL2	2.54469	0.265717	2.27e-15	1.02e-12
PLPPR4	2.53939	0.324013	4.85e-11	8.32e-09
LPAR3	2.53203	0.309045	7.61e-12	1.59e-09
CTB-147C13.1	2.50028	0.550169	4.2e-05	0.00138712
KCNH5	2.4915	0.562787	5.53e-05	0.00173464
KLK7	2.4901	0.452161	1.6e-06	8.69e-05
ADGRL3	2.48945	0.312455	3.04e-11	5.64e-09
RP11-807H7.2	2.47361	0.546282	4.76e-05	0.00153122
GAL	2.45597	0.327146	3.53e-10	4.97e-08
PRMT8	2.44569	0.270121	9.57e-14	3.06e-11
RP11-696F12.1	2.44565	0.585399	2.03e-06	0.000105888
ECEL1	2.44122	0.390395	2.39e-12	5.75e-10
PTHLH	2.43741	0.32175	2.72e-10	3.93e-08
RP11-63N8.3	2.43674	0.626448	0.00101279	0.019518
TLL1	2.43467	0.317075	1.68e-10	2.52e-08
LINC00593	2.41801	0.481076	9.54e-06	0.000390977
ADAMTS19-AS1	2.40367	0.434771	1.6e-06	8.7e-05
RP11-343B18.2	2.39246	0.509826	3.02e-05	0.00104603
MIA2	2.39134	0.432731	4.3e-06	0.000202009
DCAF12L2	2.38601	0.352628	1.39e-08	1.31e-06
EDN2	2.38511	0.330777	1.88e-09	2.22e-07
RSPO2	2.38165	0.441232	3.01e-06	0.000149856
ALPL	2.36008	0.279108	4.29e-12	9.64e-10
COX6B2	2.32008	0.300194	2.16e-10	3.17e-08
AKNAD1	2.31172	0.286892	4.51e-11	7.83e-09
SLC16A9	2.31084	0.202884	7.16e-20	5.86e-17
CTD-2034I21.2	2.30816	0.635023	0.000760455	0.0153306
RP11-655M14.14	2.27894	0.345184	4.23e-08	3.52e-06
SLC4A10	2.27164	0.49871	5.6e-05	0.00175112
NCCRP1	2.26864	0.268773	7.52e-12	1.58e-09
ABCB1	2.23195	0.273248	3.98e-11	7.02e-09
FGF10	2.23018	0.4783	4.43e-05	0.00144715
RP11-236J17.6	2.22424	0.478928	3.53e-07	2.34e-05
RP11-286B14.1	2.21432	0.40863	4.27e-06	0.000201014
VWDE	2.2059	0.478693	5.43e-05	0.0017055
RP11-283I3.1	2.19698	0.467025	4.36e-05	0.00143027
CYP4F3	2.19405	0.286744	4.8e-10	6.47e-08
MUC4	2.19233	0.327144	3.74e-08	3.15e-06
UPK1B	2.18574	0.378526	1.34e-06	7.61e-05
MMRN1	2.18495	0.220914	4.21e-15	1.77e-12
KCNIP4	2.17573	0.311102	1.21e-08	1.15e-06
CTB-49A3.2	2.17434	0.493255	0.000102013	0.00288281
AC116614.1	2.16808	0.311582	1.42e-08	1.33e-06
SLC9A2	2.16571	0.308643	1.13e-08	1.09e-06
UCP1	2.16382	0.2867	1.11e-09	1.39e-07
ST8SIA6	2.16088	0.301939	6.34e-09	6.69e-07
HES7	2.14686	0.23461	3.85e-13	1.05e-10
PES1P2	2.13687	0.428354	2.15e-05	0.000783189
CTD-2007L18.5	2.13201	0.23776	1.2e-12	3.04e-10
KRT16	2.12618	0.408202	7.74e-06	0.000329128
GUCY2GP	2.1218	0.556149	0.000962901	0.0187147
FTCD-AS1	2.1196	0.543743	0.000424593	0.00948438
RP11-1090M7.3	2.10348	0.359552	1.33e-06	7.54e-05
RN7SL823P	2.09184	0.446322	0.000260874	0.006364
LINC01269	2.08042	0.2775	1.63e-09	1.94e-07
MPPED1	2.07767	0.253996	9.2e-11	1.44e-08
KCNU1	2.07668	0.52749	0.000519222	0.0111727
RP11-384F7.2	2.07176	0.587987	0.00102954	0.0197454
EPS15P1	2.06867	0.604409	0.00131974	0.024445
EGLN3	2.06815	0.327377	2.83e-07	1.93e-05
LINC00371	2.06722	0.355058	1.68e-06	9.05e-05
AC060834.2	2.05677	0.287531	9.23e-09	9.21e-07
RP11-644L4.1	2.05522	0.45117	0.00010643	0.00299439
BNIP3P9	2.05072	0.378226	7.14e-06	0.000308566
RP11-288A5.2	2.04848	0.350727	1.55e-06	8.51e-05
AACSP1	2.04032	0.394224	1.55e-05	0.000590578
TLL2	2.03422	0.224894	1.59e-12	3.88e-10
FSTL4	2.03171	0.372225	6.51e-06	0.000286619
AGBL1	2.03012	0.404364	1.57e-12	3.86e-10
SGK223	2.02536	0.196288	1.46e-15	6.95e-13
SIRPB3P	2.02501	0.428136	5.77e-05	0.00179684
SNRPGP4	2.02464	0.318062	3.17e-07	2.14e-05
CTC-575I10.1	2.02295	0.403134	4.93e-05	0.00157553
RP11-685M7.5	2.02184	0.384111	1.29e-05	0.000501914
TDRD15	2.01604	0.294289	4.59e-08	3.77e-06
KRT19	2.01318	0.261665	1.27e-09	1.55e-07
RP11-662J14.1	2.00069	0.44637	0.000617298	0.0128838
HCN1	1.99335	0.481284	0.000299293	0.00712801
CYP4F12	1.98697	0.233739	3.67e-11	6.62e-09
SLC6A3	1.98269	0.395396	2.96e-05	0.00102798
GPER1	1.98167	0.207424	2.18e-05	0.000792299
MSLN	1.97644	0.304737	0.00101929	0.0195961
RP11-453M23.1	1.94309	0.532636	0.00101129	0.0195127
OR7E11P	1.9412	0.349591	6.55e-06	0.000288266
PGR	1.93052	0.229521	8.63e-11	1.37e-08
C5orf58	1.92637	0.200746	2.19e-13	6.54e-11
PLA2G2A	1.92507	0.405389	0.000747458	0.0151163
PENK	1.92446	0.359826	5.21e-05	0.0016469
BTC	1.92197	0.332413	3.2e-06	0.00015748
SEC14L6	1.91978	0.19078	1.88e-14	6.91e-12
RP11-804N13.1	1.90872	0.369737	2.17e-05	0.000790745
HSPA8P4	1.90114	0.209598	4.49e-12	1e-09
SAMD7	1.90042	0.417942	9.66e-05	0.00274754
PHACTR3	1.89941	0.402394	7.92e-07	4.82e-05
TTLL2	1.89552	0.370047	3.13e-05	0.00107895
FBXO32	1.88577	0.220059	5.77e-11	9.6e-09
RP11-655M14.4	1.88017	0.25687	1.47e-08	1.36e-06
HIF1A-AS2	1.87913	0.289619	3.03e-07	2.06e-05
HMGB2P1	1.87464	0.359226	2.3e-05	0.000827234
IL1RL1	1.86897	0.288107	8.23e-06	0.000346277
DYNAP	1.86712	0.510371	0.00257649	0.0421707
SCEL	1.85733	0.401694	0.000123864	0.00339223
IMPG2	1.85532	0.219331	1.23e-10	1.89e-08
CTC-558O2.1	1.85021	0.286133	4.4e-07	2.86e-05
TSPAN1	1.84534	0.280673	3.1e-07	2.1e-05
ART2P	1.8428	0.373872	6.06e-05	0.00186978
INSL4	1.82582	0.415387	0.00028732	0.0068778
COL23A1	1.82495	0.326369	8.9e-06	0.000369808
EPHA5-AS1	1.82433	0.531201	0.00188859	0.0325991
ITGA2	1.8197	0.204617	2.23e-11	4.24e-09
C8orf31	1.81156	0.26287	1.14e-07	8.62e-06
MDGA2	1.81112	0.314705	5.78e-06	0.00026056
CTA-929C8.6	1.81001	0.196991	5.75e-12	1.23e-09
AC144450.1	1.80049	0.32671	1.22e-05	0.000478596
CCDC3	1.80002	0.277336	5.41e-07	3.45e-05
MLPH	1.79328	0.239206	1.28e-08	1.22e-06
RP11-65F13.3	1.79152	0.300811	3.27e-06	0.00016056
PEX5L	1.79016	0.276479	5.83e-07	3.68e-05
CES1	1.78548	0.399032	0.000224751	0.00560084
STK26	1.78446	0.193047	5.78e-12	1.23e-09
NCOA7-AS1	1.78428	0.337533	2.67e-05	0.000940728
RP11-97N19.2	1.78043	0.357773	6.43e-05	0.0019735
FAM124A	1.77086	0.178968	2.6e-13	7.41e-11
CPAMD8	1.77086	0.222587	2.15e-09	2.5e-07
SLC6A12	1.76951	0.308778	7.43e-06	0.000318311
CXorf49	1.75649	0.246231	6.52e-08	5.14e-06
RP3-428L16.2	1.75592	0.17641	2.24e-13	6.59e-11
ARHGEF3	1.75353	0.13367	1.22e-21	1.35e-18
MYZAP	1.74354	0.258962	3.12e-07	2.11e-05
RP11-779O18.2	1.73919	0.404395	0.000377286	0.00860563
RP11-30P6.6	1.72211	0.298927	8.49e-06	0.000355041
VWA5B1	1.72182	0.33312	4.64e-05	0.00149971
AC112198.1	1.72105	0.237035	5.33e-08	4.29e-06
SLC10A1	1.71058	0.285924	4.53e-06	0.000211268
CCDC68	1.71057	0.235712	5.72e-08	4.54e-06
QPCT	1.70556	0.213769	3.61e-09	4.03e-07
CTD-2527I21.15	1.70499	0.273002	1.9e-06	0.000100157
KIAA1644	1.70216	0.254009	4.48e-07	2.9e-05
LINC00661	1.69917	0.421964	1.33e-09	1.61e-07
CSDC2	1.6965	0.217839	8.4e-09	8.54e-07
HRASLS5	1.68445	0.282207	5.45e-06	0.000247877
KCNC4-AS1	1.68403	0.269986	2.25e-06	0.00011606
P2RX5	1.68086	0.285717	7.12e-06	0.000308255
NPY5R	1.68058	0.452397	0.00156856	0.0280768
RP11-283I3.4	1.68039	0.375669	0.000305767	0.00724337
RP11-283I3.2	1.6757	0.309294	2.76e-05	0.00096898
PRRG3	1.67045	0.307376	2.78e-05	0.000974891
SDR42E1	1.67006	0.34957	0.000157782	0.00415715
TRAV38-1	1.66138	0.36419	0.000260382	0.00635687
EHF	1.65752	0.208238	5.82e-09	6.17e-07
RP4-555D20.1	1.65526	0.367187	0.000313867	0.00741325
NDST4	1.64618	0.610733	9.17e-05	0.00263139
ITIH2	1.64349	0.263948	3.16e-06	0.00015583
SLC44A5	1.64097	0.357381	0.000272893	0.00660673
RIPK4	1.63755	0.293822	2.23e-05	0.000807219
RP13-463N16.6	1.63319	0.225975	1.1e-07	8.36e-06
RP5-1029K10.4	1.63116	0.40025	0.00088333	0.0173798
AKAP17BP	1.63073	0.357079	0.000297104	0.00709605
ZNF385B	1.62834	0.316878	7.53e-05	0.00225497
BCAR4	1.62639	0.344857	0.000197832	0.00503376
SLC26A2	1.61589	0.245399	1.18e-06	6.8e-05
CCDC64	1.61062	0.295212	3.48e-05	0.00118328
ABCC4	1.60964	0.210611	3.05e-08	2.63e-06
POU2AF1	1.60492	0.299797	4.71e-05	0.00151757
ISCA2P1	1.59919	0.320928	0.000140293	0.00376468
C7	1.58097	0.218298	1.5e-07	1.09e-05
RP11-793H13.3	1.58053	0.292757	3.94e-05	0.00131494
HECW2	1.57428	0.182723	9.49e-10	1.23e-07
HMSD	1.5728	0.357143	0.00052781	0.0113194
GPHA2	1.55744	0.245387	3.58e-06	0.000174739
C6	1.55639	0.324139	0.00187857	0.0324963
FAM83E	1.55479	0.280347	3.6e-05	0.00122096
SGPP2	1.55264	0.268313	1.94e-05	0.000724894
MIAT	1.5513	0.318679	0.000197097	0.00502307
RP11-384L8.1	1.55085	0.23206	1.32e-06	7.52e-05
CTD-2528A14.1	1.54928	0.393539	0.00173152	0.0304475
ACKR3	1.54911	0.226202	8.05e-07	4.88e-05
CALML3-AS1	1.54787	0.27257	2.63e-05	0.000930553
KRT6A	1.54726	0.502659	0.000254768	0.00624368
GRPEL2-AS1	1.54064	0.258475	1.31e-05	0.00051066
NR5A2	1.53745	0.2689	1.16e-09	1.44e-07
SLCO2A1	1.52929	0.178308	1.87e-09	2.21e-07
AKR1B15	1.52899	0.362473	4.22e-11	7.37e-09
NFE2	1.5262	0.259127	1.66e-05	0.000628538
MYO1A	1.52574	0.258471	1.62e-05	0.000614357
ELOVL7	1.52418	0.307956	0.000189189	0.00485641
RP11-678G15.2	1.5224	0.224926	1.25e-06	7.15e-05
TRAV39	1.5203	0.402948	0.00222094	0.0374085
SCN11A	1.51893	0.173411	1.03e-09	1.3e-07
SDR16C5	1.51389	0.360937	0.00101841	0.0195908
HS6ST2	1.5113	0.211633	4.19e-07	2.73e-05
GALNT15	1.51054	0.24216	6.88e-06	0.00029962
ST6GALNAC2	1.51052	0.210515	3.79e-07	2.5e-05
RP11-361L15.5	1.50609	0.243088	8.05e-06	0.000339398
B4GALT4-AS1	1.50574	0.349545	0.00120307	0.0226042
KCNC4	1.50122	0.159698	8.69e-11	1.37e-08
AC005355.2	1.5012	0.2736	5.22e-05	0.00164903
PLCXD2	1.50107	0.320528	0.000384506	0.0087391
ARHGEF28	1.5009	0.145202	1.31e-12	3.3e-10
ASPHD2	1.49841	0.199503	1.29e-07	9.6e-06
RP11-815J21.4	1.49568	0.243496	1.01e-05	0.000412337
PDE4C	1.49556	0.325416	0.000477048	0.0103983
LINC01558	1.49458	0.318395	0.000383193	0.00871546
ST6GALNAC1	1.49213	0.306473	0.000263516	0.00640888
ATP8B5P	1.49135	0.219212	1.29e-06	7.36e-05
CAPN6	1.48951	0.318131	0.00040448	0.00912165
KLRC2	1.48842	0.504046	7.47e-05	0.00224527
FAT3	1.48341	0.322072	0.000494947	0.0107226
SERPIND1	1.48199	0.265589	5.05e-05	0.00160424
C3orf36	1.47973	0.258099	3.38e-05	0.00115325
CHRDL1	1.47956	0.338921	0.000821297	0.0163609
ASS1P10	1.47719	0.262318	4.45e-05	0.00144881
GBP6	1.47094	0.348022	0.00107609	0.0205028
GSTO2	1.4693	0.264544	5.67e-05	0.00177115
HOOK1	1.46901	0.248717	2.28e-05	0.000822036
KCNMA1-AS1	1.46616	0.243839	1.67e-05	0.000631833
RP11-597M17.2	1.46607	0.301342	0.000304745	0.00722988
FOXO6	1.4656	0.185728	4.88e-08	3.97e-06
RP11-100L22.1	1.46549	0.269241	7.61e-05	0.00227234
SLC16A1	1.46167	0.171432	4.5e-09	4.9e-07
RP11-740N7.3	1.46037	0.317842	0.000473506	0.0103282
DLGAP1	1.4603	0.338335	0.000986604	0.0190941
SEC14L2	1.46017	0.210489	1.26e-06	7.18e-05
RP11-351J23.2	1.45512	0.391364	0.00306171	0.0482813
COX7A2P1	1.44884	0.366406	0.00199005	0.0340013
HCG22	1.44758	0.309382	0.000491221	0.0106781
DLG3-AS1	1.44736	0.290704	0.000248065	0.00609343
LINC01258	1.44732	0.310235	0.000494825	0.0107226
LINC01315	1.44643	0.177712	2.46e-08	2.17e-06
PKP2	1.44277	0.17756	2.84e-08	2.46e-06
ESR2	1.44082	0.291354	0.000281656	0.00676759
AC012123.1	1.43777	0.380721	0.00288708	0.0461658
REPS2	1.43679	0.170555	1.02e-08	1.01e-06
CTA-929C8.7	1.43645	0.223298	6.15e-06	0.000273699
LRRIQ4	1.4352	0.221043	5.96e-06	0.000267235
VWA7	1.43298	0.218104	4.58e-06	0.000212996
RP11-8P13.5	1.43269	0.234137	1.63e-05	0.000618363
ARHGAP44	1.42598	0.197651	6.93e-07	4.28e-05
RPS6KA2	1.42349	0.13648	3.39e-12	7.84e-10
NTSR1	1.42149	0.320246	0.000902308	0.0177095
CALML5	1.41926	0.602089	0.000304012	0.00721785
MANSC4	1.41525	0.331552	0.00132651	0.0245562
ANGPTL5	1.41404	0.315458	0.000857092	0.0169366
FAM20A	1.41207	0.22346	1.14e-05	0.000452987
KLB	1.40883	0.21178	4.42e-06	0.000207182
RAPGEF4-AS1	1.40312	0.368717	0.00306325	0.0482817
DHCR24	1.40043	0.195545	1.06e-06	6.23e-05
ZNF385D	1.39864	0.281444	0.000327727	0.00767813
RP11-132E11.2	1.39524	0.306603	0.000815709	0.0162699
DIRAS3	1.39489	0.21228	6.26e-06	0.000276384
GPR4	1.39459	0.147871	3.75e-10	5.18e-08
ARG2	1.39323	0.194068	1.07e-06	6.23e-05
PALMD	1.39275	0.208857	4.71e-06	0.000217508
RP11-1299A16.3	1.39141	0.202419	2.74e-06	0.000138385
LINC01443	1.38967	0.686739	4.23e-05	0.00139376
ENPP1	1.38914	0.238607	4.84e-05	0.00155447
RP11-443P15.2	1.3871	0.246439	7.93e-05	0.0023517
LINC00908	1.38704	0.357879	0.00292535	0.0466387
TMEM30B	1.38415	0.232245	3.65e-05	0.00123529
CTA-929C8.8	1.38337	0.194833	1.47e-06	8.2e-05
CES4A	1.37699	0.218509	1.52e-05	0.000580925
MTMR7	1.37669	0.200075	3.02e-06	0.000149959
SLPI	1.37395	0.263016	0.000201315	0.00510482
ABCA5	1.37357	0.167607	4.66e-08	3.81e-06
AIM1L	1.37195	0.326762	0.00175102	0.0306752
RP11-753H16.5	1.37012	0.24414	9.05e-05	0.00260825
SLC12A2	1.36843	0.173388	1.54e-07	1.11e-05
PRR15L	1.36655	0.280468	4.71e-08	3.85e-06
VWFP1	1.36612	0.233036	5.11e-05	0.00162134
ABCA9-AS1	1.36132	0.293552	0.000768657	0.0154569
CTD-2147F2.2	1.36039	0.336761	0.00242003	0.0400759
ECE1	1.35938	0.141458	3.66e-10	5.11e-08
ASS1P6	1.35704	0.189256	1.47e-06	8.2e-05
LRP4	1.34831	0.168648	1.31e-07	9.73e-06
RP11-331K21.1	1.34564	0.297955	0.00110035	0.0209151
MLLT4	1.34434	0.121116	9.09e-13	2.34e-10
CTD-2372A4.1	1.34396	0.330503	0.00281005	0.0451602
CA7	1.34285	0.298727	0.00115098	0.0217997
RP11-655B23.1	1.33813	0.295557	0.00103984	0.019931
PCAT29	1.33766	0.309367	0.00154123	0.0277297
VEGFA	1.33232	0.218105	3.56e-05	0.00120932
FOXA1	1.33138	0.36294	0.000155848	0.00410957
RP11-305F18.1	1.32886	0.292144	0.00104875	0.0200657
B3GNT8	1.32805	0.25049	0.000240862	0.00594392
RERGL	1.32368	0.296084	0.00132972	0.024587
APOL4	1.32366	0.218097	4.11e-05	0.00136172
ENTPD2	1.32193	0.275476	0.000729704	0.0147947
FLJ38576	1.31946	0.214057	3.46e-05	0.00118052
USP54	1.31873	0.124179	1.27e-11	2.57e-09
RAB27B	1.31582	0.270873	0.000658241	0.0136049
CTD-2104P17.2	1.30761	0.265608	0.000625344	0.0130177
SSX2IP	1.30553	0.177089	1.5e-06	8.34e-05
FAM91A1	1.30347	0.17071	6.99e-07	4.31e-05
WFDC2	1.30136	0.260288	0.0005379	0.0114972
GRIP2	1.29983	0.222269	8.69e-05	0.00252809
TIMP3	1.29912	0.191132	6.84e-06	0.000298906
LINC01482	1.2981	0.222103	8.58e-05	0.00250357
CCL28	1.29797	0.221221	8.54e-05	0.00249422
SH3BGRL2	1.29731	0.143258	8e-09	8.32e-07
NF2	1.28999	0.143093	9.63e-09	9.57e-07
PTPN13	1.28965	0.143117	8.58e-09	8.7e-07
TMEM200C	1.28658	0.241569	0.000299557	0.00712801
F2RL3	1.2803	0.234394	0.000232396	0.00575279
CLGN	1.27955	0.256636	0.000634365	0.0131797
SNCAIP	1.27314	0.244724	0.000430585	0.00960186
NR4A2	1.27202	0.294438	0.00228966	0.038381
IL20RB	1.26886	0.209319	6.8e-05	0.00206459
PHLDB2	1.25901	0.140137	1.9e-08	1.71e-06
INSIG1	1.25668	0.178836	7.09e-06	0.000307688
GAS2	1.25432	0.249965	0.000694982	0.014208
TJP1	1.25319	0.143738	3.89e-08	3.26e-06
FAM132A	1.25291	0.263201	0.00112622	0.0213769
RP11-563M4.1	1.25005	0.277452	0.00184163	0.0319961
RP11-44B19.1	1.25001	0.224566	0.000232193	0.00575223
RP11-438B23.2	1.24997	0.285311	0.00227991	0.0382521
RP5-1172A22.1	1.24921	0.197185	4.15e-05	0.00137342
SPTLC3	1.24792	0.192872	3.02e-05	0.00104603
NOX4	1.24513	0.235398	0.000434166	0.00965475
PMEPA1	1.24397	0.180971	1.08e-05	0.000435157
RP1-240K6.3	1.24183	0.295176	0.00311793	0.0489743
GNAZ	1.24048	0.190333	2.88e-05	0.00100684
TCN2	1.23287	0.1354	2.1e-08	1.88e-06
GABRG1	1.22914	0.411788	0.00149637	0.0270729
ANKDD1B	1.22823	0.199866	7.94e-05	0.00235345
AC007966.1	1.22111	0.232547	0.000562728	0.0119241
BTNL8	1.21914	0.257734	0.00145567	0.026432
CACNB2	1.21872	0.192287	5.72e-05	0.00178075
BTBD11	1.21614	0.20388	0.000130478	0.00354903
MN1	1.21385	0.174651	1.37e-05	0.000531796
CTA-503F6.2	1.21369	0.188185	4.46e-05	0.00145137
AHNAK2	1.21175	0.173926	1.34e-05	0.000520299
RNY3P8	1.21069	0.279424	0.00298141	0.0473187
PDE8B	1.20585	0.199011	0.000119208	0.00329296
MYO1D	1.20284	0.182612	3.35e-05	0.00114417
CACNA1H	1.20142	0.250014	0.00143227	0.0262251
STXBP6	1.19846	0.273123	0.0029968	0.0474687
POU5F2	1.18901	0.230657	0.000722919	0.0146758
NCALD	1.18747	0.238897	0.0011619	0.0219673
PPP1R36	1.18637	0.173402	2.31e-05	0.000832485
PAM	1.18211	0.121882	8.13e-09	8.37e-07
ST6GAL1	1.17925	0.15728	4.66e-06	0.000216219
MGAT3-AS1	1.17902	0.262271	0.00291152	0.0465101
KCNMA1	1.17714	0.231568	0.000888939	0.0174686
CYP3A4	1.17389	0.237789	0.00136953	0.0251629
TDRP	1.16841	0.156075	6.21e-06	0.000274981
SLC47A2	1.16562	0.178292	6.06e-05	0.00186978
SORBS1	1.1638	0.156736	7.48e-06	0.000319427
RUNDC3B	1.16037	0.229751	0.00119983	0.0225643
CD44	1.16025	0.197235	0.00025537	0.00625362
SLC9B2	1.15862	0.180974	9.11e-05	0.00261776
MGAT3	1.15861	0.152443	4.67e-06	0.000216235
CHSY3	1.15679	0.172819	4.62e-05	0.00149528
RP11-336A10.5	1.15641	0.247459	0.00234693	0.0391559
KIAA1462	1.15473	0.117241	8.06e-09	8.33e-07
PAPLN	1.15286	0.163658	2.15e-05	0.000783189
INHBB	1.15275	0.204654	0.00044588	0.00984667
FCN3	1.14957	0.238454	3.02e-06	0.000149959
KDM1B	1.1488	0.145419	2.79e-06	0.000140105
CYYR1	1.14879	0.163317	2.35e-05	0.000842815
GREB1	1.14869	0.202323	0.000421716	0.00943704
FAT4	1.14545	0.181546	0.000128065	0.00349829
BCR	1.1438	0.134816	6.07e-07	3.82e-05
MAB21L1	1.14267	0.242072	0.00241966	0.0400759
AMD1P2	1.13975	0.197287	0.000367599	0.00842681
RP11-323C15.2	1.13939	0.179652	0.000122843	0.00337248
KIF21A	1.13587	0.224612	0.00144323	0.0263353
LDLRAD4-AS1	1.13547	0.217399	0.00108273	0.020617
TNFAIP8L3	1.13414	0.149028	6.8e-06	0.000297534
FGR	1.13359	0.169318	6e-05	0.00185618
AFAP1L1	1.12866	0.14759	7.24e-06	0.000311191
FXYD6	1.12607	0.227544	0.00192028	0.0330104
LINC00472	1.12528	0.187126	0.000272114	0.00659789
MPPED2	1.12217	0.215142	0.0012461	0.0232565
MLLT4-AS1	1.12156	0.221518	0.00158309	0.0282893
ZNF483	1.11617	0.115863	3.71e-08	3.12e-06
CASZ1	1.11577	0.181309	0.000224854	0.00560084
EVA1C	1.11566	0.140324	4.27e-06	0.000201014
IQUB	1.11051	0.195296	0.000593074	0.0124351
RP11-382M14.1	1.10704	0.173068	0.000149505	0.00397514
LARP1B	1.10142	0.134752	2.83e-06	0.000142052
TESK2	1.10119	0.131476	1.66e-06	8.93e-05
CSPG4	1.10043	0.160361	6.17e-05	0.00189928
NT5E	1.09812	0.185346	0.00038155	0.00869047
EFCAB6	1.0959	0.13609	4.24e-06	0.000200943
TTC9	1.0949	0.152652	3.19e-05	0.00109659
GNG13	1.09446	0.562657	6.48e-05	0.00198635
HRH1	1.0936	0.172291	0.000196802	0.00501956
TEX2	1.09201	0.106052	1.06e-08	1.04e-06
FLT1	1.0919	0.18391	0.000448764	0.00988985
PVRL3	1.09189	0.134524	3.57e-06	0.00017448
AC004067.5	1.08771	0.16539	0.000134306	0.00362947
CCDC150	1.08674	0.179661	0.000374042	0.00855226
TMEM246-AS1	1.0858	0.224573	0.00298583	0.0473653
CH17-118O6.3	1.08516	0.211601	0.00192069	0.0330104
SERPINB8	1.0831	0.12483	1.1e-06	6.38e-05
FGD5	1.07723	0.123535	1.1e-06	6.41e-05
TMOD1	1.07678	0.149449	4.37e-05	0.00143186
KLF5	1.06277	0.148705	5.88e-05	0.001829
ANKRD33B	1.06271	0.144903	3.73e-05	0.00125626
LONRF3	1.06263	0.141606	2.62e-05	0.000928212
CTC-236F12.4	1.06034	0.210017	0.00262072	0.0427849
A4GALT	1.05851	0.168179	0.000308855	0.00731111
KLF3	1.05831	0.11912	8.3e-07	5e-05
FBXW4P1	1.05736	0.176651	0.000556931	0.0118091
SLC35G1	1.05624	0.152175	8.28e-05	0.00244045
B4GALT4	1.05545	0.12075	1.53e-06	8.43e-05
CCDC39	1.05223	0.141694	3.64e-05	0.00123243
PLVAP	1.05049	0.197731	0.00196691	0.0336682
ANO7P1	1.04736	0.167271	0.000388233	0.00879251
CYP3A5	1.04503	0.204317	0.00266284	0.0433839
AC097533.1	1.04306	0.149381	9.62e-05	0.00274129
SRSF12	1.0429	0.137291	2.93e-05	0.00101936
TGFB2-AS1	1.03881	0.197384	0.00227069	0.0381631
TACC1	1.03486	0.135648	2.18e-05	0.000792299
RP11-973N13.2	1.03407	0.185763	0.00144675	0.0263776
ASS1P7	1.03379	0.175814	0.000856061	0.0169267
ATL1	1.03373	0.125144	7.8e-06	0.000331217
CLIC2	1.0328	0.169492	0.000635508	0.0131948
MRLN	1.03089	0.373962	1.39e-22	1.85e-19
KL	1.02844	0.193334	0.00228054	0.0382521
PLEKHA7	1.02625	0.155807	0.000280117	0.00673568
FNIP2	1.02576	0.125366	1.07e-05	0.000433732
SLCO5A1	1.02497	0.291973	2.67e-10	3.88e-08
MBOAT1	1.02448	0.156228	0.000301936	0.0071739
NR2F1	1.02183	0.166521	0.000687514	0.0140914
RP1-59D14.5	1.01901	0.15704	0.000363881	0.00835958
PRR29	1.01674	0.159181	0.000440497	0.00977512
EZR	1.00566	0.141086	0.000145326	0.0038737
AHCYL2	1.0024	0.143195	0.000192859	0.00493079
AC006116.22	0.999128	0.176616	0.0018164	0.0316611
MYO6	0.998554	0.125297	2.74e-05	0.000962234
FOSL2	0.998208	0.168008	0.00121219	0.0227099
WDFY2	0.994498	0.106749	1.47e-06	8.2e-05
ADGRF5	0.993941	0.172684	0.0017052	0.0300674
PTPRB	0.993784	0.186026	0.00305956	0.0482713
SLC44A3	0.986492	0.151885	0.000543968	0.0115991
RP5-1180D12.1	0.985013	0.155773	0.000737658	0.014937
RP11-547D13.1	0.984741	0.160743	0.000999046	0.0192998
PCDHB12	0.984616	0.156269	0.0007749	0.015553
DOCK9	0.984252	0.139321	0.000192502	0.00492712
RSPH9	0.982594	0.171112	0.00186591	0.0323475
PACSIN2	0.98005	0.0750661	6.83e-11	1.12e-08
RP11-527N22.2	0.971965	0.365924	0.0014472	0.0263776
PER2	0.970733	0.123594	5.71e-05	0.00177976
PTPRE	0.969375	0.15723	0.00121262	0.0227099
CRACR2A	0.964204	0.116651	2.95e-05	0.0010245
ISG20	0.960215	0.162693	0.001918	0.0329997
MKL2	0.959497	0.131121	0.000201177	0.00510482
TGFB2	0.956546	0.167556	0.0024405	0.0402752
UNC13B	0.952354	0.0820439	1.1e-08	1.07e-06
LIMK2	0.948431	0.0773309	3.01e-09	3.41e-07
GALNT13	0.946069	0.381338	0.000227331	0.0056449
DOCK9-AS2	0.944192	0.151677	0.00143377	0.0262376
FANCE	0.943463	0.148764	0.00120941	0.0226777
PITPNC1	0.938884	0.136234	0.000547663	0.0116435
EYA2	0.935742	0.135869	0.000583271	0.012283
SLC45A4	0.934708	0.123124	0.000185073	0.00477377
RSG1	0.933463	0.139165	0.000800304	0.0160115
SDCBPP3	0.933043	0.153939	0.00209153	0.0355071
KLRG2	0.932571	0.449968	0.00298832	0.0473814
LDOC1L	0.92725	0.0886475	6.49e-07	4.06e-05
C8orf88	0.926664	0.148151	0.00170022	0.0299963
LRP8	0.923828	0.152939	0.00237863	0.0395402
PCDHGC3	0.917503	0.13587	0.00100596	0.0194216
ATP9A	0.916903	0.10183	1.92e-05	0.00071878
SREBF2	0.916353	0.0962611	9.22e-06	0.000381899
LINC01422	0.915639	0.143036	0.00163315	0.0290053
DLG3	0.915601	0.105764	3.93e-05	0.00131288
JOSD1	0.908921	0.10495	4.61e-05	0.00149425
ALDH3A2	0.901993	0.128701	0.000903929	0.0177304
CPEB2	0.901036	0.144426	0.00242963	0.0401789
EMP2	0.894476	0.144934	0.00294161	0.0468438
CPO	0.894078	0.139444	0.0021413	0.0362941
MYO5C	0.89065	0.140563	0.00232988	0.0388919
MAFF	0.887885	0.239594	0.000340757	0.0079195
COL4A3BP	0.887702	0.118295	0.000472844	0.0103278
KIAA1522	0.884951	0.126787	0.000976586	0.0189231
PPFIA2	0.882728	0.3078	0.000261635	0.00637771
JMY	0.879911	0.120084	0.000752704	0.0152031
TTC28	0.879089	0.0693579	2.37e-08	2.11e-06
URB1	0.879033	0.0981902	5.54e-05	0.00173563
KIAA1109	0.872912	0.114537	0.000612535	0.0127927
RP11-288H12.3	0.872256	0.134822	0.00275758	0.0444288
PYGB	0.869829	0.134059	0.00239089	0.0396615
SIX4	0.868853	0.127537	0.00190312	0.0327614
SDCBP	0.868631	0.115259	0.000702053	0.014325
EP300	0.866086	0.0743271	4.16e-07	2.72e-05
IMPA1	0.861581	0.106424	0.000323382	0.00759863
FCHSD2	0.856286	0.110439	0.000703925	0.0143449
SLF1	0.843017	0.124391	0.00289323	0.046241
BPGM	0.830729	0.111565	0.00149844	0.027095
TRIOBP	0.830528	0.112643	0.00175201	0.0306752
TNS1	0.814321	0.103806	0.00150433	0.027186
ST13	0.81178	0.07396	1.07e-05	0.000433812
SMG6	0.800755	0.0839147	0.000188775	0.00484967
RNF185	0.798941	0.0681277	6.39e-06	0.000281668
ERN1	0.788688	0.0857464	0.000431516	0.00961591
SERAC1	0.7738	0.0840669	0.000672702	0.013859
DUSP18	0.768148	0.0957743	0.00287756	0.0460366
TMEM233	0.758694	0.220818	0.000113844	0.00316671
TCF20	0.755857	0.0745023	0.000360339	0.00829013
PRKAA2	0.708545	0.158509	1.64e-06	8.87e-05
PITPNB	0.695996	0.0683381	0.00270587	0.0438834
NFIL3	0.686663	0.145332	0.00145208	0.0264062
DDX17	0.686585	0.0603971	0.00135394	0.0249483
CFAP161	0.654577	0.270315	9.04e-05	0.00260825
FAM19A4	0.625065	0.431522	0.000171204	0.00445928
CLCN1	0.599907	0.288068	3.65e-06	0.000177643
JPH1	0.590991	0.31472	9.72e-12	2e-09
ANGPTL7	0.538528	0.227854	5.15e-06	0.000235397
EEF1DP5	0.505701	0.537197	8.48e-06	0.000355041
CTD-2339F6.1	-0.517858	0.313268	0.00316099	0.0495775
UPK3B	-0.547625	0.273743	0.000211029	0.0053103
TREM1	-0.577694	0.243339	0.000583511	0.012283
CA10	-0.591873	0.566454	0.0023235	0.0388057
LINC00485	-0.601623	0.632399	4.77e-22	5.85e-19
RP11-752L20.3	-0.647609	0.213876	0.000276087	0.00665379
CNR1	-0.662659	0.302578	7.74e-05	0.00229898
A1BG	-0.668409	0.325203	0.000187528	0.00482929
IL21R-AS1	-0.675086	0.377508	0.00163143	0.0289955
SHISA9	-0.68903	0.485569	8.57e-05	0.00250292
FABP4	-0.703965	0.291358	0.00155778	0.0279464
ART1	-0.713032	0.340175	0.000242672	0.00597936
APOA1	-0.756456	0.325946	0.000328208	0.00768378
CREB3L4	-0.770433	0.0962267	0.00284039	0.0456019
HOXA3	-0.791734	0.600805	2.4e-13	6.91e-11
ARRB2	-0.805518	0.102137	0.00146497	0.026565
CDK5	-0.80952	0.0987916	0.000900245	0.0176799
RP1-34B20.4	-0.813059	0.318704	0.000145575	0.00387711
COX5A	-0.813476	0.104886	0.00148052	0.0268166
NPR3	-0.818014	0.349632	1.27e-08	1.21e-06
NUDT1	-0.819734	0.107785	0.00152774	0.0275313
P3H4	-0.821744	0.109238	0.00163739	0.0290644
MRPL24	-0.822804	0.0931392	0.000273296	0.00660709
NLRC4	-0.824617	0.11395	0.00220684	0.0372271
JHDM1D-AS1	-0.833287	0.0974811	0.000319674	0.00752259
ALDH1B1	-0.83482	0.101488	0.000484255	0.0105411
SRD5A3-AS1	-0.842122	0.116675	0.00162106	0.0288547
PSMA8	-0.842449	0.851686	0.00045461	0.0100118
C21orf58	-0.850149	0.129082	0.00318217	0.0498363
RP11-60A8.1	-0.857217	0.287736	0.000347293	0.00804798
IRF5	-0.85835	0.132742	0.00315459	0.0495015
LAPTM5	-0.858386	0.127982	0.0023494	0.0391767
RP11-25I15.3	-0.862192	0.38743	1.44e-07	1.05e-05
SLC43A3	-0.862206	0.108791	0.000419656	0.00940874
CSF1	-0.862332	0.126196	0.00189501	0.0326746
PYCARD	-0.863238	0.131647	0.00265106	0.0432582
STKLD1	-0.867297	0.123353	0.00134552	0.0248505
PRADC1	-0.867995	0.116881	0.000764959	0.0153922
RASSF4	-0.869966	0.124216	0.00131671	0.0244031
RP11-259N19.1	-0.875947	0.116798	0.000585119	0.0123006
IRF8	-0.878254	0.134598	0.00216553	0.0366294
CLCN2	-0.88019	0.136963	0.00261387	0.042695
IGSF6	-0.880597	0.139111	0.0027445	0.0443074
CD53	-0.883172	0.137318	0.00230043	0.0385008
DHRS11	-0.884733	0.111043	0.00024585	0.00604368
TTYH3	-0.885396	0.132146	0.00158086	0.0282651
VAV1	-0.889276	0.137505	0.00204313	0.0348336
PDLIM2	-0.890843	0.135149	0.00188589	0.0325788
BTK	-0.891783	0.139653	0.00212954	0.036114
COL4A5	-0.892775	0.139631	0.00236929	0.0394466
RP11-46A10.5	-0.893032	0.136509	0.00174068	0.0305591
HCK	-0.893206	0.130984	0.0012826	0.0237985
C19orf38	-0.894035	0.140352	0.00215921	0.036559
RP11-490M8.1	-0.894106	0.14483	0.00277521	0.0446903
RHEBL1	-0.894339	0.139178	0.00200346	0.0341937
MMP25-AS1	-0.895115	0.112899	0.000207351	0.00522599
FCRLB	-0.901037	0.133371	0.00111789	0.0212359
HMBS	-0.903643	0.1067	6.83e-05	0.00207316
CKLF	-0.904926	0.129194	0.000727325	0.0147558
NUDT17	-0.90858	0.1117	0.000109292	0.00305809
RNASE6	-0.910477	0.140313	0.00145693	0.0264341
GPX7	-0.91073	0.10673	5.15e-05	0.00163186
RP11-429E11.2	-0.911052	0.472009	0.000128578	0.00350631
SERPINH1	-0.913365	0.141404	0.00189719	0.0326769
TEAD4	-0.915553	0.143765	0.00159326	0.0284392
SPI1	-0.915716	0.153342	0.00259272	0.0424147
RASGRP4	-0.91792	0.127213	0.000432751	0.00962999
WAS	-0.918131	0.134222	0.000750468	0.0151675
GPX1	-0.918166	0.136945	0.00129579	0.0240294
RGS10	-0.920731	0.107131	3.66e-05	0.00123654
HOXA4	-0.922039	0.523943	7.06e-10	9.31e-08
AC069277.2	-0.92384	0.677645	0.00169182	0.0298645
SRD5A3	-0.927371	0.112155	6.01e-05	0.00185742
C1QC	-0.927406	0.150659	0.00171894	0.0302762
BIN2	-0.929886	0.139319	0.000840845	0.0166775
CD33	-0.930715	0.12772	0.000311792	0.00737515
ARMC12	-0.933901	0.160697	0.00273679	0.044243
TRPM2	-0.935073	0.161164	0.00275132	0.0443727
HLA-DRB1	-0.935601	0.163943	0.00319268	0.0499764
C1QB	-0.93562	0.147871	0.00125523	0.0233858
LILRB4	-0.936485	0.149524	0.00135543	0.0249498
C3AR1	-0.936545	0.151707	0.00155289	0.0278901
TMC8	-0.937859	0.12745	0.000238708	0.0058999
SSR4P1	-0.937876	0.133636	0.000419862	0.00940874
METTL24	-0.941126	0.16441	0.00274781	0.0443385
HOXB5	-0.942431	0.392256	0.000265704	0.00645225
CCDC167	-0.944452	0.12654	0.000180876	0.00468063
PARVG	-0.944618	0.134885	0.000387315	0.00878418
LILRA2	-0.945132	0.158829	0.0019783	0.0338186
RP11-848P1.3	-0.94559	0.128969	0.000224606	0.00560084
LINC01176	-0.946231	0.148483	0.00104759	0.0200555
SLC22A18AS	-0.946715	0.138055	0.000467691	0.0102433
KIF21B	-0.951208	0.159673	0.00183108	0.0318301
TLDC2	-0.951628	0.159662	0.00185083	0.032121
MAP4K1	-0.95165	0.130997	0.000226975	0.00564046
MPEG1	-0.952734	0.139409	0.000466205	0.0102178
B3GNT7	-0.954644	0.154314	0.00127746	0.0237445
ELF3	-0.954893	0.340138	1.37e-06	7.73e-05
DDIAS	-0.959156	0.170836	0.00272238	0.0440841
GABRA3	-0.960113	0.363754	0.00162757	0.0289544
AIF1	-0.961307	0.126742	0.000109142	0.00305723
CLEC4G	-0.962264	0.454806	0.000299558	0.00712801
SATB2	-0.963772	0.147248	0.000604984	0.0126599
TTC39C	-0.964056	0.170169	0.00238676	0.0396522
RP11-1275H24.3	-0.967927	0.159515	0.00126009	0.0234626
PCOLCE	-0.968069	0.167775	0.00155688	0.027946
EVI2A	-0.968869	0.153998	0.000888581	0.0174686
RP11-834C11.4	-0.96944	0.141658	0.000353606	0.00817646
YJEFN3	-0.970455	0.167619	0.0018241	0.0317609
CD300C	-0.970559	0.144781	0.000447647	0.00987204
CEL	-0.971676	0.173873	0.00246417	0.0406029
TMCC1-AS1	-0.971856	0.138081	0.000239669	0.00591907
LILRB2	-0.971956	0.148563	0.000544574	0.011601
RP11-38L15.3	-0.972503	0.179195	0.00309923	0.0487526
ZIC3	-0.972916	0.702074	7.75e-05	0.00230023
PCED1B	-0.976159	0.124273	4.87e-05	0.00156045
CORO2A	-0.976416	0.172662	0.00211488	0.0358843
RP11-295G20.2	-0.977245	0.149846	0.000524995	0.0112817
CYTH4	-0.977313	0.131039	0.000102012	0.00288281
SLC1A5	-0.980283	0.141171	0.000243176	0.00598716
PPARGC1A	-0.98095	0.183749	0.00272635	0.0441259
SGOL2	-0.981308	0.151456	0.000543468	0.0115991
AIFM3	-0.981386	0.272223	7.46e-06	0.000319084
LIMD2	-0.981545	0.145931	0.000366266	0.00840534
COL1A2	-0.986682	0.146905	0.000276028	0.00665379
RP11-8L8.2	-0.992949	0.182684	0.00239028	0.0396615
COTL1	-0.993035	0.108057	1.95e-06	0.000102835
TNS3	-0.993902	0.160302	0.000797378	0.0159641
MX2	-0.99423	0.203339	1e-05	0.000408338
FOXD4	-0.995128	0.178506	0.00196826	0.0336682
POMC	-0.995248	0.283649	0.000109854	0.00306909
GYG2	-0.995838	0.169756	0.00119139	0.0224188
ZMYND15	-0.995941	0.139011	0.000133764	0.0036199
RPP25	-0.996418	0.177258	0.00177467	0.0310353
TCHH	-0.996705	0.176679	0.00175216	0.0306752
AC005330.2	-0.998373	0.170524	0.00124044	0.0231778
OLFML2B	-0.99994	0.154094	0.000414558	0.00931602
FCER1G	-1.00026	0.124217	2.06e-05	0.000757196
RP11-733O18.1	-1.00175	0.177474	0.00164407	0.0291505
TACC3	-1.0023	0.137211	9.27e-05	0.0026559
RAC2	-1.00331	0.132367	5.36e-05	0.0016893
ABTB1	-1.00494	0.149094	0.000253175	0.0062094
LOXL3	-1.00631	0.157916	0.000511276	0.0110244
SUGCT	-1.00636	0.153341	0.000335787	0.00782107
RN7SL138P	-1.00714	0.148105	0.000225979	0.00562008
LINC01232	-1.00809	0.170563	0.000958391	0.0186498
RP11-313D6.3	-1.00995	0.14461	0.000150208	0.00398389
UNQ6494	-1.01281	0.515707	0.00011104	0.00309952
UBE2T	-1.0144	0.17886	0.00137517	0.0252425
BGN	-1.0148	0.163192	0.00052017	0.0111856
GINS2	-1.0158	0.193396	0.002498	0.0410441
CERKL	-1.0163	0.149264	0.000188154	0.00483761
OPLAH	-1.01679	0.179002	0.00134979	0.0249149
AC144449.1	-1.0189	0.184992	0.00172797	0.0304186
MFSD2B	-1.02129	0.172973	0.000876659	0.0172698
NLRP3	-1.02133	0.17295	0.00082965	0.0164861
NCF4	-1.02247	0.13497	3.74e-05	0.00125897
NCF1	-1.02276	0.163169	0.000465531	0.01021
ZDHHC11	-1.02529	0.200268	0.00286727	0.0458951
ABCC3	-1.02531	0.187596	0.00170849	0.0301088
CABP4	-1.02564	0.164887	0.000496147	0.0107413
MAP6	-1.02566	0.148078	0.000149725	0.00397768
FAM222A-AS1	-1.0257	0.358888	7.96e-06	0.000336789
ARHGAP9	-1.02576	0.125582	1.1e-05	0.000439844
POU2F2	-1.02629	0.147862	0.000129808	0.00353382
AC109829.1	-1.02635	0.196743	0.00254918	0.0417879
HLA-DMA	-1.02848	0.1324	2.63e-05	0.000929696
CD244	-1.02928	0.187513	0.00160784	0.0286673
GSG2	-1.03166	0.191876	0.00189039	0.0326126
SNHG4	-1.03393	0.187879	0.00152047	0.0274311
FOLR2	-1.03442	0.180771	0.00096987	0.0188158
RP11-791G15.2	-1.03477	0.178373	0.000906866	0.0177771
SERPINA1	-1.03622	0.168668	0.000469677	0.0102727
GPR35	-1.03819	0.168011	0.000461523	0.010143
FAM188B	-1.03863	0.18332	0.00108706	0.0206873
AEBP1	-1.04025	0.1879	0.00124003	0.0231778
PSTPIP1	-1.04077	0.156344	0.000174798	0.00454054
PDE6G	-1.04417	0.178171	0.000762959	0.0153617
EPHA1-AS1	-1.04504	0.212152	0.00307177	0.048392
BASP1	-1.04618	0.197246	0.00178113	0.0311142
C17orf96	-1.04639	0.166406	0.000342588	0.00795626
RP3-522D1.1	-1.04676	0.188243	0.00120781	0.0226609
SLC22A20	-1.04898	0.194765	0.00157147	0.0281131
RNF150	-1.05038	0.169244	0.000376287	0.00858898
PTPRO	-1.05086	0.172348	0.000444556	0.00983102
SOWAHD	-1.0519	0.189167	0.00115251	0.0218157
ASGR2	-1.05227	0.172509	0.000447428	0.00987204
CKS2	-1.0528	0.177684	0.000608321	0.0127214
LL21NC02-1C16.1	-1.05452	0.176585	0.000566729	0.011985
RP11-51F16.1	-1.05646	0.155881	0.000118244	0.00326918
TNFAIP8L2	-1.05771	0.139654	2.14e-05	0.000783189
FNDC4	-1.05808	0.196729	0.00143504	0.0262458
LRRC25	-1.0584	0.146313	4.44e-05	0.00144867
LILRB1	-1.05873	0.159996	0.000158032	0.00416029
THBS1	-1.05918	0.305003	1.38e-10	2.08e-08
PDIA5	-1.06168	0.123826	1.94e-06	0.000102058
AC004156.3	-1.06217	0.183021	0.000682365	0.0140038
TNFRSF11A	-1.06276	0.15469	9.13e-05	0.00262174
OSCAR	-1.06374	0.147949	4.59e-05	0.00148892
TRBC2	-1.06422	0.213619	0.00250193	0.0410768
MTHFD2	-1.06459	0.149072	4.94e-05	0.00157688
ADAMTS17	-1.06607	0.215478	0.00245711	0.04051
HLA-DRB5	-1.06627	0.214237	0.00231771	0.0387494
CD48	-1.06665	0.184899	0.00068184	0.0140021
VAMP5	-1.06684	0.167172	0.000215377	0.00540693
TYROBP	-1.06759	0.137825	1.56e-05	0.000595695
TREM2	-1.06923	0.172794	0.000316388	0.00746728
TRIB3	-1.07072	0.169007	0.000243849	0.0059991
CTD-2341M24.1	-1.07118	0.190678	0.000854714	0.0169232
RP11-380L11.4	-1.07161	0.194383	0.00101642	0.0195762
BOLA3	-1.07171	0.111811	1.09e-07	8.27e-06
RP11-155D18.13	-1.07704	0.212858	0.00204506	0.0348479
FANCA	-1.07943	0.169609	0.000202499	0.0051269
ADAMTS7	-1.07967	0.188338	0.000620504	0.0129338
SEMA4A	-1.08025	0.139672	1.08e-05	0.000435652
PRDX4	-1.08106	0.110921	5.56e-08	4.45e-06
KCNJ3	-1.08232	0.413909	2.97e-09	3.39e-07
KIF11	-1.08262	0.195424	0.000812103	0.016208
GNA15	-1.08289	0.133227	4.01e-06	0.000192681
CD28	-1.08371	0.228241	0.00305462	0.048217
LY86	-1.08601	0.147189	2.19e-05	0.000794614
ORC6	-1.08666	0.16634	0.000132728	0.00360408
TRBC1	-1.08793	0.227804	0.00284427	0.0456183
AC011515.2	-1.08841	0.227164	0.00286629	0.0458951
RP5-899E9.1	-1.08866	0.177965	0.000283162	0.00679865
MROH6	-1.08897	0.142447	1.11e-05	0.000443234
AC005578.3	-1.08934	0.21541	0.00188346	0.0325633
NID1	-1.09085	0.194783	0.000578864	0.0122093
SNAI2	-1.09146	0.181655	0.000346658	0.00803909
DOC2GP	-1.09162	0.231918	0.00311259	0.0489145
CRTAM	-1.09179	0.21948	0.00201725	0.0344107
FAM35DP	-1.09197	0.228349	0.00279423	0.0449513
CTD-2035E11.5	-1.0939	0.161872	7.69e-05	0.00228965
AC006946.15	-1.0946	0.210803	0.00145598	0.026432
RP11-229P13.25	-1.09513	0.215616	0.0017417	0.0305591
MYO1G	-1.09687	0.186303	0.000392114	0.00886782
PTMAP5	-1.09807	0.185291	0.000375403	0.00857492
KIAA0226L	-1.09849	0.142657	8.84e-06	0.000368063
SIGLEC1	-1.09898	0.220147	0.00186854	0.0323755
STK32B	-1.09963	0.11069	0.000653287	0.0135166
NCF1B	-1.10148	0.189196	0.000436114	0.00968458
SCUBE2	-1.10149	0.234867	0.00292542	0.0466387
PSAT1	-1.10163	0.199053	0.000688984	0.0140944
CTD-3035D6.1	-1.1022	0.196772	0.000639981	0.0132619
RENBP	-1.10237	0.134054	2.2e-06	0.000113958
NANOS3	-1.10256	0.20474	0.000931285	0.0181888
KHK	-1.10362	0.161205	5.57e-05	0.001744
MMP24	-1.10408	0.18232	0.000277655	0.00668151
CCDC170	-1.10445	0.157525	3.85e-05	0.0012929
E2F2	-1.10448	0.233051	0.00267098	0.0434876
IL15	-1.10463	0.189906	0.000432338	0.00962751
NLN	-1.10522	0.110593	1.49e-08	1.38e-06
CEBPA-AS1	-1.10551	0.182064	0.00026323	0.0064068
SLC17A9	-1.1057	0.179522	0.000214089	0.00538307
AIM1	-1.10658	0.195754	0.000554171	0.0117662
RP11-2E11.9	-1.10736	0.158248	3.96e-05	0.00131948
CTSW	-1.10884	0.200471	0.000695884	0.0142173
FPR3	-1.10947	0.165741	7.04e-05	0.00213091
ADM5	-1.11051	0.222921	0.00175532	0.0307137
RHBDL1	-1.11186	0.208317	0.000946715	0.0184451
TMEM71	-1.1121	0.189234	0.000361818	0.00831816
SLC37A2	-1.11212	0.155394	2.43e-05	0.000866588
PCED1B-AS1	-1.11321	0.136865	2.33e-06	0.000120016
MS4A14	-1.11414	0.179131	0.000180072	0.00466361
CCNA2	-1.11544	0.20731	0.000857799	0.016938
CLECL1	-1.11623	0.194244	0.000442199	0.00979248
MYO10	-1.11737	0.168141	7.71e-05	0.00229525
RP11-156K13.3	-1.11877	0.232094	0.00221697	0.0373783
CH17-340M24.3	-1.11976	0.116795	3.43e-08	2.91e-06
SLC29A4	-1.12053	0.22569	0.00165653	0.0293389
SLAMF8	-1.12061	0.179194	0.000158639	0.00417283
MFI2-AS1	-1.12093	0.186026	0.00023488	0.00580977
HLA-DQB1	-1.12185	0.223964	0.00144088	0.0263142
C1orf229	-1.12264	0.17879	0.000143529	0.00383862
SPC24	-1.12277	0.20939	0.000823401	0.0163721
VENTX	-1.12323	0.179713	0.000143364	0.00383741
SIGLEC7	-1.12421	0.156244	1.99e-05	0.000736464
ITGAX	-1.12512	0.17865	0.000131964	0.00358639
IGFBP2	-1.12583	0.186514	0.000182745	0.00472519
SLC7A5	-1.12616	0.216	0.00102744	0.0197266
WNT5A	-1.12634	0.205157	0.000637413	0.0132258
RGL3	-1.12674	0.220747	0.0012516	0.0233454
SDS	-1.12732	0.275905	3.84e-06	0.000184776
OGDHL	-1.12738	0.210748	0.000858225	0.016938
HS3ST1	-1.12807	0.2044	0.00060376	0.0126425
RP11-174G17.3	-1.13016	0.240726	0.00227587	0.03823
SNORA51	-1.13039	0.23272	0.00193847	0.0332482
FHOD3	-1.13144	0.330252	3.94e-08	3.3e-06
NCAPG	-1.13149	0.24517	0.00267706	0.043549
BCL2A1	-1.13218	0.230813	0.00165502	0.0293285
PKIB	-1.13411	0.191891	0.000274837	0.00663369
GAS2L3	-1.13412	0.177676	0.000104956	0.00295551
ALDH1A2	-1.13521	0.392988	9.3e-05	0.00266392
RNFT2	-1.13589	0.201017	0.000411721	0.00927184
EVA1A	-1.13618	0.289925	0.000877914	0.0172839
TRPC2	-1.13697	0.174707	7.67e-05	0.00228569
CTB-52I2.4	-1.13735	0.229535	0.00155014	0.0278563
C5	-1.13868	0.194894	0.000274525	0.00663117
LINC00323	-1.14046	0.21157	0.000687286	0.0140914
CACNA1G-AS1	-1.14197	0.245144	0.00238785	0.0396522
MELK	-1.14325	0.23158	0.00145079	0.0264062
CTB-147N14.6	-1.14345	0.224805	0.0011737	0.0221381
FCGR3A	-1.14418	0.190529	0.000190426	0.00488425
SLC1A3	-1.14485	0.180497	9.34e-05	0.00267026
LA16c-325D7.2	-1.14651	0.188086	0.000173423	0.00451338
TMEM119	-1.14669	0.221962	0.000929629	0.0181676
LILRB3	-1.14712	0.177639	7.95e-05	0.00235371
SYT15	-1.14714	0.157149	1.07e-05	0.000433635
SPRN	-1.14721	0.147962	3.5e-06	0.000171191
SFRP2	-1.14747	0.257359	0.00302909	0.0479088
RPS7P1	-1.14829	0.228381	0.00120586	0.0226377
MAMDC2	-1.14867	0.201585	0.00035772	0.0082477
RP11-474P2.4	-1.14904	0.254985	0.00285554	0.0457761
PIM1	-1.15023	0.21544	0.000666545	0.0137499
RP5-1171I10.5	-1.15148	0.189309	0.000163444	0.00428862
HMGB1P1	-1.15226	0.23106	0.00127995	0.0237632
IL2RG	-1.15726	0.169946	3.1e-05	0.00107153
FTH1P15	-1.15745	0.22193	0.000819944	0.0163441
RP11-442O1.4	-1.1578	0.235035	0.00125389	0.0233745
NUSAP1	-1.15784	0.220514	0.000719151	0.0146272
CPXM1	-1.15871	0.251601	0.00215782	0.0365547
NCF1C	-1.16078	0.166142	1.96e-05	0.000729987
MMP11	-1.16079	0.207735	0.000394753	0.0089149
KCNAB2	-1.16088	0.134404	0.00217289	0.0367127
RP11-180I4.4	-1.16097	0.263403	0.00309179	0.0486595
DPYSL4	-1.16119	0.235939	0.00124481	0.0232458
DHRS2	-1.16585	0.350722	8.3e-09	8.47e-07
DLEU7	-1.16806	0.20626	0.000324989	0.00762518
DKKL1	-1.17015	0.226415	0.000822	0.0163647
DAAM2	-1.17103	0.21593	0.000491631	0.0106798
FCGR2C	-1.1731	0.193337	0.00012841	0.00350472
GATM	-1.17383	0.178597	4.39e-05	0.00143597
LINC01146	-1.17428	0.258663	0.00237127	0.039459
RPL21P75	-1.1747	0.214352	0.000408355	0.00920255
ERAS	-1.17612	0.220195	0.000593049	0.0124351
STMND1	-1.17696	0.434588	0.00141292	0.0259006
CXorf65	-1.17742	0.260608	0.00228078	0.0382521
TREX2	-1.1786	0.198226	0.000165619	0.00434142
RP11-1094M14.8	-1.17913	0.248845	0.00166777	0.0295215
RP11-493L12.4	-1.18045	0.204614	0.000256361	0.00627308
RP1-278O22.2	-1.18071	0.265145	0.00267193	0.0434876
GTSE1	-1.18112	0.220363	0.000518059	0.0111552
LST1	-1.18175	0.156353	3.67e-06	0.000178123
RP11-185E8.2	-1.18282	0.250267	0.00161752	0.0288078
FEZ1	-1.18428	0.173587	2.04e-05	0.000751113
CTD-2292P10.4	-1.18451	0.200303	0.000167615	0.00438366
PTTG1	-1.18521	0.20368	0.000193944	0.00495456
RP11-946L16.2	-1.18524	0.269688	0.00279399	0.0449513
RP4-580N22.2	-1.1875	0.20468	0.00021783	0.00545995
RP11-458K10.1	-1.19012	0.744723	0.000943669	0.0183969
HLA-DQA1	-1.19062	0.227184	0.000584164	0.0122886
CTD-3116E22.8	-1.19091	0.245136	0.00117022	0.0220854
CDT1	-1.19102	0.232528	0.0007331	0.0148541
XCL2	-1.19331	0.248009	0.00127095	0.0236373
GRID1	-1.19433	0.27785	0.00293735	0.0468055
AC147651.4	-1.19672	0.163618	5.73e-06	0.000258949
HK3	-1.19915	0.181111	2.9e-05	0.0010119
TRIM50	-1.20052	0.262419	0.00187214	0.0324203
RPL13AP5	-1.20082	0.228306	0.000531341	0.0113875
TMEM150B	-1.20088	0.182058	3.12e-05	0.00107781
VTN	-1.20139	0.2508	0.00114569	0.0217124
NKG7	-1.20514	0.196885	8.85e-05	0.00256205
C16orf59	-1.20566	0.222703	0.000385994	0.00876192
KIAA1324L	-1.20575	0.203178	0.000120031	0.00331283
LURAP1L	-1.20626	0.204167	0.000139268	0.00374347
DUSP5P1	-1.20681	0.256236	0.00143794	0.0262838
CDK1	-1.20682	0.222857	0.000354546	0.00819228
SMOC2	-1.20851	0.224447	0.000493636	0.010716
RP4-647J21.1	-1.20944	0.222457	0.000358902	0.008269
CRYBB1	-1.21058	0.150819	6.76e-07	4.21e-05
LINC00671	-1.21068	0.279167	0.00260662	0.0426202
CTLA4	-1.21099	0.278738	0.00249866	0.0410441
A1BG-AS1	-1.21135	0.200174	9.76e-05	0.00276694
OXCT2	-1.21224	0.280603	0.00255205	0.0418136
LINC01503	-1.21275	0.15332	8.74e-07	5.24e-05
PSRC1	-1.21317	0.164186	4.05e-06	0.000194178
TVP23A	-1.21383	0.196354	7.02e-05	0.00212642
SPAG5	-1.21767	0.176931	1.22e-05	0.000477926
TEX41	-1.21855	0.266882	0.00166923	0.029531
PDGFRA	-1.2201	0.288836	0.00282615	0.0453961
PAQR4	-1.22084	0.189608	3.68e-05	0.00124181
RP1-45C12.1	-1.22407	0.284219	0.00248303	0.0408294
RYR3	-1.22444	0.264061	0.000167412	0.00438195
AC053503.4	-1.22557	0.273736	0.00196845	0.0336682
PTGDR2	-1.22586	0.307512	0.00299005	0.0473853
B3GNT4	-1.22655	0.230189	0.000403777	0.00911224
FAP	-1.22698	0.305151	8.99e-05	0.00260016
PYCR1	-1.22738	0.150802	3.76e-07	2.48e-05
RP11-374F3.5	-1.22905	0.252258	0.00101212	0.019517
RP11-3P17.5	-1.23003	0.284737	0.00231925	0.038755
EDNRA	-1.23127	0.208258	0.000109365	0.00305809
SEMA6D	-1.23265	0.228011	0.000284992	0.00683745
KIFC1	-1.23379	0.237122	0.000463716	0.0101772
ACAA2	-1.23462	0.169315	3.73e-06	0.00018033
YES1P1	-1.23661	0.255533	0.00078296	0.0157049
HIST1H1C	-1.2367	0.247656	0.000673592	0.0138683
LINC01356	-1.23772	0.192469	3.3e-05	0.00112823
KCNAB3	-1.23822	0.192468	3.22e-05	0.00110426
ACRV1	-1.2391	0.204306	7.65e-05	0.00228213
RPS3AP53	-1.2413	0.27735	0.0018268	0.0317729
CFH	-1.24144	0.25106	0.00041641	0.00934451
CDKN3	-1.24332	0.204646	7.05e-05	0.00213182
TMEM249	-1.24346	0.301402	0.00305177	0.0481959
CCER2	-1.24439	0.244375	0.000511294	0.0110244
CDCA5	-1.2446	0.191577	2.61e-05	0.000926768
SMPD5	-1.24468	0.305648	0.00317799	0.0497953
CCDC151	-1.24571	0.181062	9.4e-06	0.00038572
MT1F	-1.24753	0.286645	0.00199409	0.034052
ZNF695	-1.25108	0.259886	0.000940383	0.0183553
CGNL1	-1.2512	0.208405	6.77e-05	0.0020593
GPR143	-1.25133	0.307574	0.00310295	0.048787
RP11-443B7.3	-1.25159	0.218909	0.000161218	0.00423369
AC012668.2	-1.25207	0.355104	3.42e-07	2.28e-05
RPL37P6	-1.2533	0.236652	0.000334537	0.00781475
RP11-133K1.12	-1.25451	0.203297	5.42e-05	0.0017055
ELN	-1.2558	0.242262	0.000413789	0.00930531
LINC01094	-1.2566	0.168855	1.85e-06	9.81e-05
COL6A3	-1.25831	0.209212	8.5e-05	0.00248445
NT5M	-1.25886	0.154867	2.36e-07	1.64e-05
CD300LF	-1.259	0.197805	3.07e-05	0.00106474
CD3D	-1.26107	0.230017	0.000215078	0.00540368
POLQ	-1.26163	0.200388	3.54e-05	0.00120462
MIR3142HG	-1.26205	0.226184	0.000186724	0.00481249
AC006538.1	-1.26222	0.177528	4.26e-06	0.000201014
SLC5A2	-1.26435	0.288924	0.00179627	0.0313616
FLRT2	-1.26446	0.188193	1.17e-05	0.000462084
RPS15AP17	-1.26655	0.263937	0.000807953	0.0161454
TCTEX1D1	-1.26704	0.224565	0.000153055	0.00405602
FOXD3	-1.26809	0.636928	0.000836847	0.0166085
ZNF541	-1.27107	0.251467	0.000498081	0.0107686
TLCD1	-1.2713	0.169218	1.26e-06	7.19e-05
COL7A1	-1.27225	0.24826	0.000382589	0.00870791
FOXM1	-1.27277	0.22483	0.000135255	0.00365098
ITGB2-AS1	-1.27376	0.189892	1.09e-05	0.000437262
FMO2	-1.2741	0.31432	0.00255523	0.0418441
SPC25	-1.27432	0.253963	0.000517801	0.0111552
HOXA-AS2	-1.27603	0.381942	1.31e-14	4.98e-12
INTS4P1	-1.27842	0.29498	0.00177665	0.031053
AP000439.1	-1.27846	0.240726	0.000285779	0.00684606
FCGR1A	-1.27891	0.180117	3.65e-06	0.000177643
IDI2-AS1	-1.27968	0.227182	0.000139408	0.00374407
LSP1	-1.27987	0.220077	9.07e-05	0.0026123
RP11-338N10.1	-1.28002	0.281049	0.00126909	0.0236165
AURKA	-1.28029	0.194898	1.47e-05	0.000565312
ALDH1L1-AS2	-1.28102	0.315788	0.00269738	0.0438248
C2orf48	-1.28369	0.289872	0.00156274	0.0280196
SLC1A6	-1.28652	0.640213	3.22e-05	0.00110426
CUBN	-1.28801	0.228845	0.000122931	0.00337248
AZU1	-1.28898	0.259943	0.000498749	0.0107757
MESTP3	-1.28988	0.230039	0.000138392	0.00372845
RP11-832N8.1	-1.29027	0.243774	0.000257927	0.00630176
RP11-362F19.1	-1.29049	0.260958	0.000532346	0.0113965
RP11-764K9.1	-1.2912	0.254454	0.000461851	0.0101433
ESCO2	-1.29269	0.241486	0.000225958	0.00562008
EIF4EBP1	-1.29401	0.125256	5.69e-11	9.51e-09
RP11-90P13.1	-1.29522	0.293898	0.00144125	0.0263142
RPS19P3	-1.29532	0.266405	0.000592446	0.0124351
RP11-153M7.3	-1.29612	0.246838	0.000272692	0.00660673
CTC-251I16.1	-1.29625	0.180432	2.44e-06	0.000124976
RP11-513G11.4	-1.29722	0.314235	0.00229417	0.0384163
FCGR1B	-1.29833	0.181865	2.71e-06	0.000137011
SNX22	-1.2989	0.213454	4.12e-05	0.00136202
KIF2C	-1.30226	0.188209	4.77e-06	0.000219695
RND3	-1.30226	0.1688	7.65e-07	4.67e-05
STAT4	-1.30239	0.229874	0.000106779	0.00300134
CTD-2619J13.8	-1.30284	0.232562	0.000118167	0.00326918
PLAU	-1.3078	0.176154	1.05e-06	6.19e-05
KRT6B	-1.30944	0.695059	0.00135931	0.025004
ABC7-42404400C24.1	-1.30999	0.193111	6.17e-06	0.000273842
C10orf90	-1.31001	0.254849	0.00031812	0.00749706
KCNN4	-1.31012	0.208268	2.25e-05	0.000811518
WDR62	-1.31081	0.226903	7.73e-05	0.00229832
RP11-452C13.1	-1.31081	0.225331	8.17e-05	0.00241001
RP11-1149M10.2	-1.31142	0.271969	0.000620093	0.0129337
AC007040.11	-1.31156	0.311637	0.00136224	0.0250433
HOXB3	-1.31167	0.294	8.83e-14	2.88e-11
RP11-25K19.1	-1.31216	0.253796	0.000276428	0.00665699
CYP27C1	-1.31429	0.210079	2.39e-05	0.00085647
GZMA	-1.31465	0.227188	7.09e-05	0.002143
COL5A3	-1.31477	0.205337	1.44e-05	0.000553544
RP11-82L18.2	-1.31534	0.193246	6e-06	0.000268905
CDCA8	-1.31844	0.192052	4.7e-06	0.000217425
MYBPHL	-1.31873	0.247364	0.000202777	0.0051269
RP4-635E18.6	-1.31887	0.303784	0.00151896	0.0274195
XCL1	-1.31972	0.249317	0.000208469	0.00525002
RHEBP2	-1.32021	0.213	2.81e-05	0.000983581
ADAP1	-1.32337	0.223551	4.99e-05	0.0015908
E2F7	-1.32516	0.235225	0.000100828	0.00285439
RP11-177J6.1	-1.32544	0.222297	5.01e-05	0.00159391
SKA1	-1.32588	0.23258	8.64e-05	0.00251741
CLEC10A	-1.32676	0.2353	9.44e-05	0.00269702
RP11-43F13.3	-1.32718	0.294084	0.000953197	0.01856
BOLA3-AS1	-1.32775	0.154053	1.77e-08	1.62e-06
CD22	-1.33056	0.247894	0.000169609	0.00442494
PGA5	-1.33073	0.323213	0.00229327	0.0384163
NPAS3	-1.33177	0.234502	8.29e-05	0.00244045
LRRC10B	-1.33212	0.341193	0.00273474	0.0442393
ANXA2R	-1.33257	0.162596	6.98e-08	5.49e-06
PLPP4	-1.33346	0.299606	0.00106017	0.0202358
PVT1	-1.33352	0.161545	5.6e-08	4.47e-06
BUB1	-1.334	0.210179	1.56e-05	0.000593623
RP11-149I23.3	-1.33539	0.268996	0.000387767	0.00878818
SHCBP1	-1.33565	0.181503	9.42e-07	5.57e-05
CTD-2510F5.4	-1.33776	0.230708	6.58e-05	0.00200958
CCL26	-1.33807	0.242003	0.000114101	0.00317109
ADAM11	-1.33825	0.204399	0.00182412	0.0317609
PIF1	-1.341	0.213666	1.8e-05	0.000678125
RP3-510D11.4	-1.34362	0.222542	3.29e-05	0.00112823
RP5-899B16.1	-1.34751	0.290973	0.000675598	0.0138828
PIPOX	-1.34769	0.160571	2.98e-08	2.58e-06
CASC10	-1.34799	0.137095	1.37e-10	2.07e-08
CATSPER1	-1.35065	0.20651	7.96e-06	0.000336789
CKAP2L	-1.35138	0.256488	0.000184388	0.0047638
RNY3P16	-1.35244	0.228945	3.95e-05	0.00131618
SLAMF7	-1.35281	0.208542	9.25e-06	0.000382497
RP11-115L11.1	-1.35377	0.206068	7.21e-06	0.000310488
LILRA6	-1.35413	0.201183	4.73e-06	0.0002182
RNU4-62P	-1.35671	0.23951	7.13e-05	0.00215198
TMIGD3	-1.35688	0.176126	2.56e-07	1.76e-05
ANKRD22	-1.35694	0.250822	0.000122623	0.00337248
GZMK	-1.35705	0.266887	0.000263102	0.0064068
RP11-483L5.1	-1.36006	0.262544	0.000206048	0.00519725
TPTE2P3	-1.36013	0.223179	2.55e-05	0.000909051
SOCS5P2	-1.36062	0.406309	0.00188639	0.0325788
EIF1P6	-1.36729	0.260861	0.000184763	0.00476962
LHB	-1.3681	0.357657	0.00260965	0.042648
PLP1	-1.37016	0.305202	0.000335507	0.00782026
RP11-408P14.1	-1.37316	0.164293	0.00295528	0.0469741
PF4V1	-1.37318	0.500561	0.000171032	0.00445843
MGARP	-1.37342	0.299401	0.00066361	0.013707
EME1	-1.37627	0.178657	2.11e-07	1.48e-05
OASL	-1.37761	0.198087	1.99e-06	0.000104501
TCAM1P	-1.37786	0.331625	0.00154601	0.0277977
RECQL4	-1.38001	0.189044	6.82e-07	4.24e-05
F7	-1.38087	0.278501	0.000297735	0.0071058
RP11-205K6.3	-1.38186	0.35235	0.00317341	0.0497479
ADAMTS9-AS1	-1.38424	0.367312	0.00273773	0.044243
IGHV3-73	-1.38651	0.359871	0.00245726	0.04051
CSTA	-1.38975	0.185292	3.24e-07	2.18e-05
CTD-2515H24.2	-1.391	0.267909	0.000179649	0.00465644
RP11-439A17.9	-1.39203	0.269268	0.000204316	0.00515766
SLC4A11	-1.39314	0.242898	4.65e-05	0.00150279
AP002954.4	-1.39362	0.283308	0.000350648	0.00811394
TUBB8	-1.39366	0.312577	0.000968671	0.018804
COL5A1	-1.39591	0.190746	5.35e-07	3.42e-05
RP11-62H7.2	-1.39831	0.37337	0.00272069	0.044079
OPRL1	-1.39854	0.152579	8.5e-10	1.11e-07
RP11-489D6.2	-1.39868	0.529228	1.19e-05	0.000470379
RP11-277P12.10	-1.39882	0.386763	7e-07	4.31e-05
RGS7	-1.40046	0.402433	5.54e-07	3.52e-05
RP11-9N12.2	-1.40205	0.290241	0.000355382	0.00820565
RP11-153M7.1	-1.40423	0.223436	1.12e-05	0.000447597
PLAC9	-1.40545	0.256221	7.42e-05	0.00223238
SFRP4	-1.40648	0.327636	0.00098905	0.0191298
HOTAIRM1	-1.4067	0.180579	1.11e-07	8.37e-06
RP5-1142J19.1	-1.40692	0.342163	0.0016759	0.0296162
RP3-369A17.4	-1.40718	0.283625	0.000300278	0.00713983
RP11-803D5.1	-1.40848	0.328048	0.00105792	0.020217
TK1	-1.40946	0.233501	1.93e-05	0.000721999
TSPAN7	-1.41117	0.203711	1.66e-06	8.96e-05
CTD-2078B5.2	-1.41234	0.274401	0.000165728	0.00434142
RP11-428G5.5	-1.4135	0.368943	0.00286434	0.0458941
SNCG	-1.41505	0.245182	0.00303818	0.0480051
RP4-758J18.7	-1.41674	0.345248	0.00145155	0.0264062
MESTP1	-1.41809	0.216004	4.42e-06	0.000207182
ADAMTS12	-1.41919	0.269043	0.000118177	0.00326918
RP11-284F21.10	-1.41979	0.369161	0.00206974	0.035212
TPX2	-1.42043	0.22717	9.19e-06	0.000381046
RP11-483P21.2	-1.42285	0.19243	3.33e-07	2.23e-05
FMO1	-1.42362	0.246366	3.13e-05	0.00107895
HOXB-AS1	-1.42378	0.247683	3.78e-05	0.00127061
GAP43	-1.42699	0.26305	7.55e-05	0.00225995
STEAP1B	-1.42747	0.341979	0.00116517	0.0220032
BUB1B	-1.42756	0.237613	1.82e-05	0.000684677
KLF14	-1.42833	0.365513	0.00184878	0.0321028
MKI67	-1.43007	0.251425	4.08e-05	0.00135334
RP11-388C12.1	-1.43037	0.275856	0.000133591	0.00361982
DOK2	-1.43132	0.171486	1.16e-08	1.11e-06
RP13-884E18.2	-1.43307	0.314421	0.000564231	0.0119401
TYRP1	-1.43321	0.633404	0.000435508	0.00967786
RP11-666A20.3	-1.43345	0.399158	0.00266272	0.0433839
SFRP5	-1.43422	0.393792	6.51e-07	4.06e-05
HOXB6	-1.43494	0.320402	2.01e-05	0.000741922
GLIS3	-1.43522	0.240258	1.9e-05	0.000712706
RP5-826L7.1	-1.43539	0.26414	8.25e-05	0.00243341
RUNX3	-1.4374	0.191487	1.97e-07	1.39e-05
KLHL29	-1.43913	0.174533	1.52e-08	1.41e-06
ADAMTS8	-1.4393	0.29043	0.000219557	0.0054903
TOP2A	-1.4399	0.259175	4.93e-05	0.00157553
INHBA	-1.44033	0.234177	0.00284352	0.0456183
UBE2QL1	-1.443	0.223066	4.44e-06	0.000207427
CYP27B1	-1.44448	0.247001	2.48e-05	0.000885809
CRYAB	-1.44469	0.179344	0.000771706	0.0155084
LINC01410	-1.44584	0.167421	3.65e-09	4.06e-07
CTHRC1	-1.4465	0.234507	9.64e-06	0.00039465
RP11-83N9.6	-1.44666	0.211379	1.25e-06	7.16e-05
MEX3A	-1.44731	0.231604	8.08e-06	0.000340245
SUCNR1	-1.4491	0.238894	1.34e-05	0.000520299
CTD-2357A8.3	-1.45417	0.378434	0.00218574	0.0368907
AC109826.1	-1.45531	0.158463	3.27e-10	4.63e-08
MCM10	-1.45556	0.252696	2.89e-05	0.00100722
CYP4F35P	-1.45795	0.387917	0.00208673	0.0354633
NEURL3	-1.46151	0.268015	6.44e-05	0.00197538
CTD-2655K5.1	-1.46216	0.292194	0.000217525	0.00545659
RP11-211G23.2	-1.46325	0.351252	0.00032308	0.00759714
RP11-839D17.3	-1.46449	0.230058	5.17e-06	0.000236033
KIF18B	-1.46758	0.24464	1.4e-05	0.00053869
SPATA9	-1.46863	0.213089	1.07e-06	6.26e-05
RP4-794I6.4	-1.46888	0.307848	0.000293391	0.00701788
LINC00184	-1.46953	0.267269	6.17e-05	0.00189928
GAPDHP14	-1.46964	0.32869	0.000564215	0.0119401
KIF20A	-1.47063	0.245978	1.44e-05	0.000555609
ST18	-1.47288	0.284677	2.63e-06	0.000133971
PLK1	-1.47381	0.198787	1.82e-07	1.3e-05
NUF2	-1.47531	0.199279	1.89e-07	1.34e-05
RP11-353N4.5	-1.47676	0.264008	4.16e-05	0.0013736
DIRAS1	-1.47695	0.231737	0.00174131	0.0305591
RP11-440I14.2	-1.4776	0.402498	0.00270084	0.0438464
DAB1	-1.47801	0.269576	5.04e-05	0.00160407
RP11-351I21.11	-1.47803	0.329244	0.000546073	0.0116252
CCDC144CP	-1.47895	0.344195	0.000762507	0.0153617
SPP1	-1.48062	0.278097	5.7e-05	0.0017797
PCAT6	-1.48173	0.168174	9.76e-10	1.25e-07
RP11-401P9.5	-1.48277	0.326753	0.000441694	0.00978808
ECHDC3	-1.48595	0.243528	9.26e-06	0.000382645
RPL21P119	-1.4869	0.276842	6.56e-05	0.00200789
CTD-3051D23.1	-1.48846	0.233631	4.93e-06	0.000225851
LMO7-AS1	-1.49046	0.359194	0.000941721	0.0183702
RP5-963E22.6	-1.49056	0.255534	2.32e-05	0.000835252
SRMS	-1.49081	0.352764	0.00080075	0.0160115
ARL4C	-1.49225	0.217349	9.13e-07	5.43e-05
IRS1	-1.49271	0.158039	8.21e-11	1.32e-08
MFSD4	-1.49318	0.195601	0.000335326	0.00782026
RP11-435I10.3	-1.496	0.381083	0.00174805	0.0306537
AP006285.2	-1.4961	0.378242	0.00140747	0.0258155
TRIP13	-1.4968	0.189414	2.67e-08	2.32e-06
KCNT2	-1.49725	0.260117	2.18e-05	0.000792733
AP000568.2	-1.49773	0.396228	0.0015076	0.0272298
RP11-323P17.2	-1.49778	0.241062	6.13e-06	0.00027348
VN1R48P	-1.49794	0.421487	0.00294561	0.0468438
GPR68	-1.49809	0.214461	6.17e-07	3.87e-05
LOXHD1	-1.4981	0.383064	0.00153202	0.0275928
HJURP	-1.4984	0.251174	1.25e-05	0.000487899
LINC00607	-1.50021	0.199629	1.01e-07	7.76e-06
LINC01158	-1.50313	0.36522	0.000922796	0.0180451
FNDC5	-1.50388	0.189053	0.000169531	0.00442494
KIF14	-1.50455	0.237937	4.39e-06	0.000206247
RP5-1031D4.3	-1.50759	0.226658	1.61e-06	8.75e-05
GAPLINC	-1.50995	0.302957	0.000133648	0.00361982
JAZF1-AS1	-1.51096	0.215534	0.00149157	0.0270013
RP11-472N13.3	-1.51291	0.196346	4.44e-08	3.66e-06
GMPSP1	-1.51541	0.277529	4.73e-05	0.00152327
LINC00304	-1.51632	0.298766	0.000112306	0.00312939
EBF3	-1.5172	0.244982	5.69e-06	0.000257702
C10orf55	-1.51729	0.24579	6.8e-06	0.000297534
LINC01529	-1.51822	0.376834	0.0011607	0.0219576
RNU1-106P	-1.52082	0.241143	4.75e-06	0.000218936
RRM2	-1.52413	0.256423	1.23e-05	0.000481513
SMIM18	-1.52465	0.689282	0.000822871	0.0163718
EXO1	-1.52725	0.248529	6.22e-06	0.000275031
GPD1	-1.5294	0.228114	1.13e-11	2.29e-09
PPFIA4	-1.53341	0.283278	4.32e-05	0.00141948
RP13-297E16.4	-1.53476	0.284151	5.27e-05	0.00166233
TAS1R1	-1.53591	0.304259	0.000123408	0.00338266
PRR11	-1.53684	0.179336	1.34e-09	1.62e-07
SCG2	-1.53714	0.351057	3.28e-12	7.64e-10
CCNB2	-1.54341	0.226477	6.84e-07	4.24e-05
RP11-20G13.4	-1.54379	0.269018	2.18e-05	0.000792433
CDC20	-1.54425	0.215852	2.28e-07	1.6e-05
CEP55	-1.54879	0.230374	9.01e-07	5.37e-05
RP11-834C11.7	-1.5504	0.22269	4.37e-07	2.84e-05
CD180	-1.55056	0.184608	2.24e-09	2.6e-07
PLEK2	-1.55121	0.205109	5.2e-08	4.21e-06
COL6A4P1	-1.55135	0.291975	5.16e-05	0.00163311
CTD-2033D15.2	-1.55189	0.393522	5.12e-12	1.12e-09
PCP2	-1.55499	0.264378	1.21e-05	0.000475151
LKAAEAR1	-1.5574	0.446471	0.0025252	0.0414374
SDC1	-1.55853	0.179375	1.17e-05	0.000462084
ARTN	-1.55903	0.308226	9.46e-05	0.00269983
RP1-80N2.4	-1.55954	0.40954	0.00145048	0.0264062
PODNL1	-1.55981	0.247549	3.06e-06	0.000151387
UCN	-1.56194	0.208743	6.24e-08	4.94e-06
FGF22	-1.56235	0.305797	8.46e-05	0.00247755
RP11-1055B8.3	-1.56279	0.248331	0.000196548	0.00501707
AIM2	-1.56486	0.243132	2e-06	0.000104662
RP11-886D15.1	-1.5668	0.351917	0.000349272	0.00808796
CENPF	-1.56967	0.227026	3.82e-07	2.51e-05
RLTPR	-1.57193	0.209507	5.27e-08	4.25e-06
DLGAP5	-1.57239	0.26522	8.61e-06	0.000359282
WNT4	-1.57266	0.321415	0.000129555	0.00352992
RP11-150O12.6	-1.5745	0.313736	0.000104772	0.00295294
SLC45A3	-1.5766	0.209043	4.43e-08	3.66e-06
GPT2	-1.57837	0.140015	0.00222111	0.0374085
CLDN6	-1.57949	0.359539	0.000461334	0.010143
HSPB9	-1.57953	0.20647	3.22e-08	2.75e-06
ITGA8	-1.5809	0.289509	0.000773464	0.015534
OLFM2	-1.58272	0.228874	3.48e-07	2.32e-05
HOXA1	-1.5832	0.269627	1e-05	0.000409279
RP11-513O13.1	-1.58382	0.247158	2.1e-06	0.000108841
KIF4A	-1.58661	0.245539	1.58e-06	8.65e-05
RP11-236B18.5	-1.58719	0.304363	6.29e-05	0.00193177
GPR62	-1.59051	0.316812	9.1e-05	0.0026168
S100A4	-1.5945	0.161157	4.24e-06	0.000200943
CYP4F29P	-1.5955	0.359284	0.000326966	0.00766593
LA16c-352F7.1	-1.59672	0.455577	0.00158692	0.0283418
LINC00452	-1.59689	0.358427	0.000285684	0.00684606
CTD-3032H12.2	-1.60014	0.367384	0.000369531	0.00845895
RTN1	-1.60035	0.217695	0.00291565	0.0465295
RP11-785D18.3	-1.60051	0.374094	0.000675071	0.0138809
EYA4	-1.6023	0.364443	4.67e-12	1.03e-09
COL3A1	-1.60518	0.198678	4.38e-09	4.79e-07
E2F8	-1.60527	0.288411	2e-05	0.000739034
RCOR2	-1.61012	0.319478	7.48e-05	0.00224603
LINC00152	-1.61025	0.183522	2.42e-10	3.53e-08
AC079753.4	-1.61446	0.427865	0.00209124	0.0355071
RBP3	-1.61632	0.397018	0.000830762	0.016498
RTP1	-1.6195	0.39663	0.000688769	0.0140944
FAM64A	-1.62219	0.249729	1.12e-06	6.48e-05
RP11-227D13.4	-1.62571	0.395359	0.000920131	0.018015
AC004257.1	-1.62759	0.304007	3.98e-05	0.00132211
FEV	-1.62804	0.518845	3.8e-10	5.23e-08
CD300E	-1.63003	0.249558	0.000336115	0.00782301
CCL13	-1.63017	0.459748	0.000140682	0.00377197
RPL29P19	-1.63148	0.232888	1.83e-07	1.3e-05
PDE1C	-1.63301	0.291278	1.49e-05	0.000571789
CCL20	-1.63399	0.325705	0.00253174	0.0415234
FCGR2B	-1.63668	0.18942	3.24e-10	4.6e-08
IGFL4	-1.63719	0.247662	0.000273321	0.00660709
EXTL1	-1.63883	0.267518	0.00156596	0.0280458
C19orf84	-1.64063	0.256944	1.49e-06	8.3e-05
ZYG11A	-1.64253	0.353637	0.0023679	0.039444
IL4I1	-1.64346	0.22817	8.67e-08	6.7e-06
AC018890.6	-1.64512	0.305566	2.75e-06	0.000138419
RP11-83B20.7	-1.64674	0.413409	0.000786357	0.0157632
LINC00544	-1.6474	0.407983	0.000580873	0.0122436
ADAMTS16	-1.64869	0.30625	2.59e-05	0.000918714
HOXB7	-1.64896	0.223795	3.71e-11	6.65e-09
ASIC1	-1.65045	0.193752	0.00294481	0.0468438
CH17-13I23.3	-1.65394	0.317016	3.66e-05	0.00123529
RN7SL180P	-1.66062	0.407438	0.000548842	0.0116608
RP11-19E11.1	-1.66167	0.42025	0.000712103	0.014493
CDC25C	-1.66224	0.268719	2.33e-06	0.000120124
LINC01272	-1.66308	0.22535	3.58e-08	3.03e-06
FCGBP	-1.66483	0.234509	1.02e-07	7.8e-06
LINC00940	-1.6661	0.444555	0.00156405	0.0280274
SRCIN1	-1.66691	0.262688	0.00053843	0.0115008
RP11-132A1.4	-1.66907	0.280799	4.27e-06	0.000201014
RASD1	-1.66946	0.300193	1.39e-05	0.00053869
VSTM2L	-1.66998	0.297442	0.0029146	0.0465295
CTA-254O6.1	-1.67216	0.30039	1.6e-05	0.000608015
ZNF804A	-1.67224	0.27507	3.09e-06	0.000152653
IQGAP3	-1.67305	0.236519	1.07e-07	8.15e-06
BPIFA2	-1.67412	0.383877	0.000305189	0.00723505
TRIM67	-1.67829	0.295715	1.01e-05	0.000412337
PKMYT1	-1.67986	0.297529	1.06e-05	0.000428046
MATK	-1.68102	0.215253	0.000316706	0.00746926
RP11-36B6.1	-1.68228	0.374361	0.00027158	0.00658994
BANF1P2	-1.68347	0.284733	5.5e-06	0.00024975
HSPA12A	-1.6837	0.190256	8.07e-11	1.31e-08
ADAM8	-1.68538	0.18498	2.3e-11	4.35e-09
COL1A1	-1.68754	0.214438	4.62e-09	5e-07
KIAA0101	-1.68811	0.261097	7.95e-07	4.83e-05
RAC3	-1.68895	0.208786	1.91e-09	2.24e-07
MSX1	-1.6906	0.244635	1.41e-07	1.05e-05
POU5F1B	-1.69499	0.291319	6.07e-06	0.000271233
LINC01554	-1.6958	0.292826	7.03e-06	0.000305933
BST1	-1.69676	0.206567	1.04e-09	1.32e-07
IGHV3-72	-1.6991	0.341348	6.15e-05	0.00189488
RP11-834C11.8	-1.69951	0.28697	4.82e-06	0.000221443
EDARADD	-1.70051	0.24958	2.2e-07	1.55e-05
RP11-98G7.1	-1.70097	0.276682	2.42e-06	0.000123999
FCER1A	-1.70212	0.287316	4.05e-06	0.000194178
FAM83D	-1.70262	0.281036	2.72e-06	0.000137619
FEZF1-AS1	-1.7039	0.498097	4.08e-08	3.41e-06
KIRREL3	-1.70724	0.244489	2.6e-05	0.000923728
FAM225B	-1.71162	0.246294	1.25e-07	9.36e-06
CTD-2532K18.2	-1.71266	0.404127	0.000374143	0.00855226
ITIH3	-1.71273	0.219195	4.75e-09	5.12e-07
RP1-118J21.25	-1.71357	0.367951	0.00014505	0.00387143
SLC52A1	-1.71383	0.264525	5.5e-07	3.5e-05
CTA-268H5.14	-1.71645	0.401252	0.000133634	0.00361982
GPR19	-1.71723	0.249048	3.98e-05	0.00132211
ADH1C	-1.71964	0.387744	6.38e-11	1.05e-08
SUMO1P1	-1.72557	0.411002	0.000544121	0.0115991
CTD-2523D13.2	-1.72637	0.312079	1.25e-05	0.000488105
RP11-33A14.1	-1.72878	0.369897	9.5e-05	0.00270988
PODXL2	-1.73039	0.296411	4.49e-06	0.000209693
KCNQ4	-1.73137	0.203346	2.15e-10	3.17e-08
CA3-AS1	-1.73224	0.221388	2.15e-05	0.000783189
RP11-92G12.3	-1.73309	0.280782	1.69e-06	9.05e-05
TROAP	-1.73992	0.23886	3.02e-08	2.61e-06
FHAD1	-1.74087	0.227015	4.94e-05	0.00157658
AC079613.1	-1.74116	0.437967	0.000546965	0.0116364
SNORD3A	-1.74135	0.361234	0.000264294	0.00642292
LINC01055	-1.74164	0.583891	0.00313657	0.0492429
STYK1	-1.74451	0.268275	0.00014512	0.00387143
RP11-467I17.1	-1.74624	0.356943	6.73e-05	0.00204886
CERCAM	-1.74869	0.201576	8.42e-11	1.34e-08
WWC1	-1.751	0.175307	1.45e-13	4.45e-11
PAQR6	-1.75368	0.218788	1.44e-09	1.73e-07
TSPEAR	-1.7542	0.447142	0.000572332	0.0120875
LINC00565	-1.75485	0.217032	3.12e-05	0.00107781
LINC00944	-1.75618	0.410045	0.000295675	0.0070672
MAP7D2	-1.75788	0.335731	2.35e-05	0.000842161
GJB3	-1.75936	0.503267	0.000149127	0.00396839
MMP17	-1.76018	0.252477	8.29e-08	6.46e-06
RP11-554D14.4	-1.76106	0.533292	2.04e-05	0.000750823
RP5-907C10.3	-1.76125	0.628605	0.0022227	0.0374157
RCN3	-1.76173	0.210313	2.89e-10	4.16e-08
FLJ12825	-1.76389	0.237078	1.34e-08	1.27e-06
AURKB	-1.76542	0.238932	1.69e-08	1.55e-06
RP11-1008C21.1	-1.76641	0.265256	2.91e-07	1.98e-05
TPM2	-1.77193	0.169595	1.54e-06	8.47e-05
NKD2	-1.77326	0.341135	2.4e-05	0.000858122
POSTN	-1.77365	0.336894	1.97e-05	0.000731553
MEST	-1.77524	0.178177	9.89e-14	3.13e-11
TPTE2P1	-1.77568	0.256783	7.84e-08	6.14e-06
FAM201A	-1.77766	0.495346	1.87e-06	9.94e-05
CLDN2	-1.7791	0.312519	5.8e-06	0.000261301
RP11-31F19.1	-1.78052	0.390553	8.43e-05	0.00247232
FZD9	-1.78151	0.232922	5.37e-09	5.73e-07
ABCA9	-1.79094	0.29704	1.82e-06	9.7e-05
KB-1410C5.3	-1.7913	0.396499	8.15e-09	8.37e-07
AC090954.5	-1.79544	0.355347	7.45e-07	4.57e-05
ZAR1L	-1.79582	0.444602	0.000667838	0.0137676
LRRC71	-1.79745	0.245461	1.79e-08	1.62e-06
RP4-616B8.5	-1.79962	0.560328	0.00307474	0.048415
2020-03-10	-1.79996	0.328335	7.49e-06	0.000319427
CTD-2297D10.2	-1.80017	0.572363	8.32e-05	0.00244705
RP11-535A5.1	-1.80024	0.450646	0.000653545	0.0135166
VWA3B	-1.80032	0.242288	0.00135271	0.0249483
RP11-152K4.2	-1.80061	0.403202	0.00017365	0.0045156
FAM135B	-1.80102	0.345713	0.00196276	0.0336249
RP11-200A1.1	-1.80272	0.371221	6.49e-05	0.00198751
AP1M2	-1.80442	0.55139	8.47e-05	0.00247994
CGB7	-1.80576	0.280327	4.78e-07	3.07e-05
LINC00337	-1.80746	0.378797	8.83e-05	0.00256004
RP11-95H3.1	-1.80991	0.399488	0.000115689	0.00320964
TMIE	-1.81127	0.242843	8.93e-09	8.97e-07
CFAP47	-1.81372	0.339347	1.34e-05	0.000520299
VPREB3	-1.81693	0.344735	2.22e-05	0.000802688
LMCD1	-1.81852	0.26512	8.56e-08	6.65e-06
NEK2	-1.81868	0.248054	1.45e-08	1.36e-06
RP13-49I15.6	-1.81964	0.384421	0.000100633	0.00285139
IDH2	-1.82178	0.134839	2.46e-11	4.63e-09
CDCA7	-1.82814	0.266361	8.12e-08	6.34e-06
INMT-FAM188B	-1.82849	0.501034	0.000702601	0.014327
CYP4F34P	-1.82895	0.447751	0.000328933	0.0076951
ATP2A1-AS1	-1.83435	0.246754	8.66e-09	8.75e-07
RP13-395E19.2	-1.83658	0.346593	1.77e-05	0.000666371
IFITM10	-1.83739	0.183417	4.17e-14	1.42e-11
SCT	-1.83975	0.349367	1.48e-05	0.000568605
LAMA1	-1.84052	0.288061	4.1e-07	2.69e-05
RP11-159N11.3	-1.84229	0.524309	0.00127854	0.0237508
ASPM	-1.8423	0.254588	1.77e-08	1.62e-06
MAFA-AS1	-1.84363	0.604622	0.00269813	0.0438248
AC008746.10	-1.84541	0.385659	8.34e-05	0.0024499
RP1-80N2.3	-1.84725	0.319185	3.09e-06	0.000152593
GPRIN2	-1.84772	0.320901	3.33e-06	0.000163462
CENPA	-1.85134	0.247148	6.48e-09	6.81e-07
GLRA4	-1.85256	0.485005	0.000699294	0.0142778
GALNT8	-1.86094	0.29397	4.5e-07	2.9e-05
PRSS57	-1.86156	0.478833	0.000555953	0.0117962
CTD-2154I11.2	-1.86663	0.279318	1.37e-07	1.02e-05
MASP1	-1.86819	0.27114	5.72e-08	4.54e-06
RHCG	-1.86883	0.383494	0.00195012	0.0334263
KCNIP3	-1.86958	0.24306	2.54e-06	0.000129987
ANKRD20A9P	-1.87099	0.426789	0.000143074	0.00383287
CGN	-1.8742	0.255661	0.00106621	0.0203281
RP11-83M16.5	-1.87549	0.44665	0.000219995	0.00549695
NAV3	-1.8807	0.290692	2.49e-07	1.72e-05
IRX1	-1.8807	0.4886	0.000494406	0.0107226
RP11-12K11.1	-1.88192	0.383138	5.09e-05	0.00161436
RGS6	-1.88304	0.345027	7.12e-06	0.000308255
CTC-270D5.1	-1.88556	0.415509	9.75e-05	0.00276643
PRG4	-1.88717	0.393204	4.6e-05	0.00148975
PALM3	-1.89011	0.310997	4.32e-05	0.00141948
TNC	-1.89202	0.357051	1.1e-05	0.000439844
MIOX	-1.89303	0.506625	0.000855471	0.0169255
PLA2G5	-1.89899	0.396941	0.0019307	0.0331468
FIRRE	-1.90563	0.259296	7.6e-09	7.93e-07
RP11-752L20.5	-1.90759	0.410459	9.67e-05	0.00274754
CALB2	-1.90955	0.354738	1.62e-09	1.94e-07
RP11-4B16.3	-1.91037	0.40245	5.39e-05	0.00169681
RCVRN	-1.9118	0.316907	1.21e-06	6.94e-05
DUX4L50	-1.91637	0.24656	1.25e-09	1.53e-07
TNNT2	-1.91837	0.231908	1.02e-10	1.59e-08
LTK	-1.91977	0.293681	6.86e-06	0.00029937
BIRC5	-1.92596	0.256878	3.58e-09	4.01e-07
TMEM132A	-1.93116	0.203787	2.73e-13	7.72e-11
AC004221.2	-1.93587	0.395648	0.00180982	0.0315809
RP1-111D6.3	-1.93685	0.482742	0.000149872	0.00397828
P2RX6P	-1.93739	0.675803	0.0016317	0.0289955
USP32P3	-1.94	0.31112	3.53e-15	1.5e-12
RP11-617F23.1	-1.94148	0.170485	3.23e-11	5.92e-09
CDIPT-AS1	-1.94408	0.383404	1.95e-05	0.000724894
DSCAM	-1.94517	0.287163	0.000106959	0.00300134
DOK7	-1.94686	0.333896	0.000457489	0.0100682
MFI2	-1.9477	0.204992	1.15e-08	1.11e-06
SLC12A5	-1.94855	0.243163	0.00265298	0.0432674
RP11-624L4.1	-1.95148	0.513006	0.000482109	0.0105015
SPATC1	-1.96035	0.231101	3.9e-11	6.92e-09
AC142119.1	-1.96568	0.428432	9.04e-05	0.00260825
GATA6	-1.96701	0.212318	6.04e-13	1.59e-10
IL32	-1.97749	0.196146	1.02e-09	1.3e-07
SLC4A3	-1.97848	0.19365	2.85e-15	1.25e-12
U82695.9	-1.98471	0.345778	0.000298734	0.00712432
RP11-923I11.6	-1.98718	0.265805	2.79e-09	3.2e-07
HOXC4	-1.98857	0.211295	2.25e-13	6.59e-11
HOXC5	-1.98881	0.283309	1.83e-08	1.66e-06
CABLES1	-1.9899	0.208152	1.02e-13	3.19e-11
LINGO1	-1.99059	0.247646	2.08e-10	3.08e-08
RP11-524F11.3	-1.99263	0.363599	7.15e-06	0.000308674
CD19	-1.99444	0.286446	2.15e-08	1.93e-06
GRIN2C	-1.99669	0.190745	8.91e-06	0.000369808
DKFZp434J0226	-1.99678	0.357275	0.000334467	0.00781475
AC004540.4	-1.99891	0.343857	0.00244007	0.0402752
ITGAD	-1.99943	0.355277	2.57e-06	0.000130974
RP11-320G24.1	-1.99976	0.456454	0.000127856	0.00349558
RPS7P15	-2.00006	0.36515	5.95e-06	0.000267215
CRYBA2	-2.00224	0.484564	3.08e-07	2.09e-05
FCRLA	-2.01782	0.289628	0.00117728	0.0221794
LY6D	-2.02164	0.692827	0.00268908	0.0437222
RP11-551L14.6	-2.02214	0.48097	0.000192561	0.00492712
HPCAL4	-2.02275	0.376421	4.59e-11	7.92e-09
KB-173C10.2	-2.02528	0.377558	8.31e-06	0.000349012
MTRNR2L1	-2.02621	0.497939	9.35e-06	0.000385334
DOC2A	-2.033	0.251412	7.23e-09	7.57e-07
SPEG	-2.03677	0.198828	0.000319151	0.00751581
KLK6	-2.03707	0.722364	0.000345792	0.00802483
UBE2C	-2.03864	0.269183	1.28e-09	1.56e-07
PPP2R2B	-2.04017	0.304018	2.33e-10	3.41e-08
PCAT1	-2.04086	0.352479	1.16e-06	6.71e-05
BRINP1	-2.04565	0.356784	1.53e-06	8.43e-05
RP11-265N7.1	-2.04582	0.539448	0.000218932	0.00547895
LINC00619	-2.04754	0.353224	1.41e-06	7.94e-05
ATRNL1	-2.04873	0.232358	0.000623891	0.0129959
RP11-145A3.1	-2.05005	0.291102	9.85e-09	9.74e-07
MAP2	-2.05535	0.217083	0.000118118	0.00326918
KCTD4	-2.05657	0.40338	1.19e-05	0.000468229
RP11-68I18.10	-2.05824	0.19752	9.37e-06	0.000385366
MOG	-2.05891	0.514927	3.94e-05	0.00131462
RP11-326A19.4	-2.06131	0.487312	0.000153402	0.00406184
RP11-168P13.1	-2.06801	0.541563	0.00091721	0.0179689
FAM189A1	-2.07127	0.322761	1.19e-07	8.98e-06
SCX	-2.07413	0.290504	2.89e-06	0.000144354
CASC21	-2.07571	0.452356	7.25e-05	0.00218537
HCN2	-2.07871	0.229461	1.53e-08	1.42e-06
SOX6	-2.08163	0.224475	5.73e-06	0.000258949
CITF22-92A6.2	-2.08191	0.286287	3.77e-06	0.000181748
SLITRK6	-2.08381	0.531928	0.00225453	0.0379115
CD38	-2.08446	0.209622	0.000120947	0.00333236
NMU	-2.08486	0.393894	4.45e-05	0.00144867
RP11-714L20.1	-2.08561	0.394987	7.73e-06	0.00032907
FBXL21	-2.08625	0.447207	3.75e-05	0.00126199
DKK2	-2.08808	0.356748	7.56e-07	4.62e-05
IBSP	-2.08943	0.411686	0.00101728	0.019581
RP5-851M4.1	-2.0944	0.451677	3.89e-05	0.00130237
CTD-3187F8.14	-2.09705	0.466821	0.000144766	0.00386846
RP11-344F13.1	-2.09708	0.583713	0.00102784	0.0197266
AC067956.1	-2.1007	0.588319	0.000610685	0.0127624
C1orf127	-2.10734	0.217575	2.03e-06	0.000106106
PKD2L1	-2.10741	0.300435	1.05e-08	1.03e-06
RP11-636O21.1	-2.10844	0.557889	0.00193869	0.0332482
RP11-469N6.1	-2.10906	0.433787	1.97e-05	0.000733033
DNAJC5G	-2.11069	0.380481	0.000473443	0.0103282
RP11-401P9.7	-2.11148	0.34702	3.5e-07	2.33e-05
LINC00163	-2.11303	0.566816	0.00117549	0.0221588
BOK-AS1	-2.11918	0.459427	0.000121855	0.00335448
RP11-339B21.8	-2.12108	0.458844	4.58e-05	0.00148857
SLC12A1	-2.12114	0.331134	0.000154192	0.00406928
RP11-212I21.2	-2.1245	0.361427	5.61e-07	3.56e-05
GOLGA7B	-2.12518	0.254776	1.53e-05	0.00058332
RP11-429B14.4	-2.12634	0.799082	0.000568586	0.0120163
FOXD4L1	-2.13066	0.275244	0.000625918	0.0130211
RP11-373E16.1	-2.1359	0.431428	1.65e-05	0.000623515
PROM1	-2.14717	0.321082	2.35e-05	0.000842161
TAF7L	-2.15927	0.248916	3.06e-12	7.18e-10
FAM225A	-2.1593	0.2422	7.85e-13	2.04e-10
RP11-742B18.1	-2.16653	0.374146	8.08e-07	4.88e-05
CHCHD10	-2.1672	0.174674	5.61e-17	3.45e-14
RP11-96H17.3	-2.17335	0.545178	0.000228863	0.00567854
CYP26C1	-2.17346	0.355022	2.75e-07	1.88e-05
RP3-323A16.1	-2.17503	0.30515	4.06e-09	4.45e-07
SLCO1A2	-2.17957	0.525567	2.67e-05	0.00094123
DMD	-2.18266	0.210864	1.75e-16	9.64e-14
ADAMTS20	-2.18379	0.429796	1.1e-05	0.000441173
IGHV3-53	-2.19067	0.57648	0.000222627	0.00555837
RP11-373E16.3	-2.19393	0.315726	8.05e-09	8.33e-07
RP11-131N11.4	-2.19475	0.533692	0.00105284	0.0201318
VAX2	-2.19961	0.302665	1.79e-09	2.12e-07
RP11-635L1.3	-2.20255	0.571749	0.00106016	0.0202358
LINC00924	-2.20687	0.29954	1.19e-09	1.48e-07
RP11-395N3.1	-2.20714	0.377217	9.66e-07	5.7e-05
CXCR2P1	-2.20744	0.317642	0.000252772	0.00620427
RP11-481J13.1	-2.20774	0.434887	0.00230288	0.0385217
MIR4477B	-2.21315	0.444667	2.03e-05	0.000749731
AFAP1-AS1	-2.2167	0.357875	8.71e-18	5.8e-15
RP11-538I12.3	-2.22285	0.547232	0.00052753	0.0113194
DLGAP3	-2.22469	0.219816	1.21e-08	1.15e-06
HGFAC	-2.22613	0.323788	4.39e-05	0.00143519
CTA-246H3.12	-2.23022	0.66672	0.00295677	0.0469745
KCNH1-IT1	-2.23024	0.444052	9.38e-06	0.000385366
RP11-143A12.3	-2.23816	0.410956	2.58e-06	0.000131519
ASPHD1	-2.24242	0.275909	0.000125934	0.00344597
RP3-399J4.2	-2.24416	0.315671	3.04e-09	3.43e-07
CNIH2	-2.24514	0.240657	9.61e-10	1.24e-07
ASPG	-2.24547	0.441903	6.67e-06	0.00029248
AC068057.1	-2.24835	0.387591	6.9e-07	4.27e-05
ALOX15	-2.26243	0.339524	2.09e-08	1.88e-06
2020-03-04	-2.26272	0.365687	6.17e-06	0.000273842
FXYD7	-2.26673	0.290381	1.37e-06	7.71e-05
RHOBTB3	-2.26892	0.241366	2.4e-14	8.7e-12
XXbac-BPG27H4.8	-2.27617	0.344638	2.25e-08	2.01e-06
ACSL6	-2.2776	0.295581	1.81e-05	0.000680621
FIGNL2	-2.28283	0.414764	1.8e-06	9.58e-05
VIT	-2.28959	0.44525	3.64e-10	5.1e-08
CTSV	-2.29182	0.295153	1.2e-10	1.84e-08
LINC01561	-2.29218	0.41025	0.00024179	0.00596223
MMP23B	-2.29698	0.53268	0.00279864	0.0449995
LINC00466	-2.29709	0.539065	0.00181512	0.0316561
TUBB2B	-2.29897	0.274879	0.000421558	0.00943704
SYTL5	-2.30192	0.279309	5.99e-16	3.14e-13
LINC00839	-2.30263	0.409044	9.36e-07	5.55e-05
FGF7	-2.32319	0.372195	8.63e-08	6.69e-06
LINC01021	-2.32458	0.391675	3.18e-05	0.00109584
NKD1	-2.32897	0.269589	1.09e-12	2.78e-10
MATN3	-2.33801	0.245674	8.29e-09	8.47e-07
PLCH2	-2.34087	0.283288	3.38e-05	0.00115404
IGDCC3	-2.34247	0.338532	4.59e-09	4.98e-07
LUM	-2.34576	0.329493	8.01e-06	0.000338172
CNDP1	-2.35323	0.335763	2.86e-06	0.000143158
CLDN9	-2.35615	0.296021	3.73e-11	6.65e-09
COL10A1	-2.357	0.357578	4.24e-10	5.76e-08
GALNT9	-2.36599	0.310518	1.47e-11	2.93e-09
NPPC	-2.36916	0.578087	4.07e-06	0.000194931
PRKCQ-AS1	-2.37377	0.254256	0.00206866	0.035212
GBX2	-2.37562	0.316076	2.99e-06	0.000149166
RP11-86K22.2	-2.37752	0.513978	0.00173066	0.0304475
IL31RA	-2.38106	0.528827	0.000138476	0.00372845
TMED10P2	-2.38167	0.447768	2.2e-06	0.000113835
RP11-284F21.9	-2.3829	0.40506	2.62e-07	1.8e-05
RP11-556I14.1	-2.38651	0.320994	4.06e-10	5.53e-08
GREM1	-2.402	0.465305	1.59e-06	8.68e-05
ATP6V1B1	-2.40416	0.282518	1.42e-12	3.54e-10
RP11-268G12.1	-2.40447	0.669999	0.000324783	0.00762518
FOXD3-AS1	-2.41123	0.524852	0.00145469	0.026432
RP11-395N3.2	-2.4125	0.21153	1.74e-20	1.63e-17
ANO4	-2.41334	0.353966	5.64e-09	6e-07
HMX1	-2.41375	0.345468	3.76e-06	0.000181629
LINC00460	-2.43524	0.440628	8.74e-07	5.24e-05
LY6K	-2.44621	0.313771	1.2e-05	0.000471648
BRSK2	-2.44779	0.229052	0.00097297	0.0188645
AC092652.1	-2.4536	0.478747	0.000415328	0.00932677
RASGEF1A	-2.45486	0.243121	2.31e-07	1.61e-05
EFNA2	-2.46298	0.293922	3.55e-05	0.00120553
RP11-401P9.4	-2.46917	0.281664	2.34e-13	6.79e-11
AMH	-2.4808	0.335667	2.97e-10	4.24e-08
STOML3	-2.48796	0.361209	2.99e-09	3.39e-07
RP11-398M15.1	-2.48801	0.518419	1.17e-05	0.000463054
FLJ43879	-2.49463	0.423444	2.31e-07	1.61e-05
SEZ6	-2.50216	0.271553	0.00137544	0.0252425
LINC01474	-2.50922	0.675732	0.000921971	0.01804
SNORD3B-2	-2.50935	0.705183	0.000854827	0.0169232
TMC3	-2.51139	0.376294	7.19e-07	4.41e-05
RP11-208N14.4	-2.51703	0.656356	0.000497281	0.0107586
IRX2	-2.51755	0.312983	1.19e-05	0.000470424
RP11-297C4.3	-2.52164	0.745837	0.00247072	0.0406688
LINC01447	-2.52815	0.590964	0.000339111	0.00788699
SATB2-AS1	-2.54301	0.462521	0.000644823	0.0133535
CXCL1	-2.54342	0.371649	0.00135559	0.0249498
SLC5A5	-2.55169	0.422935	6.21e-14	2.04e-11
CPA4	-2.55614	0.258047	1.29e-16	7.24e-14
AC012506.2	-2.56486	0.464328	1.6e-06	8.7e-05
LINC01234	-2.56946	0.478866	3.94e-07	2.59e-05
VWA5B2	-2.57244	0.193168	1.39e-06	7.82e-05
SLC34A2	-2.5742	0.40349	4.05e-12	9.25e-10
LGSN	-2.57758	0.451241	4.64e-07	2.99e-05
ANKRD1	-2.57771	0.342352	1.06e-09	1.33e-07
ADORA1	-2.57934	0.284868	1.04e-10	1.61e-08
LA16c-380H5.5	-2.58578	0.27824	1.64e-06	8.88e-05
C5orf38	-2.59185	0.368739	9.47e-10	1.23e-07
TMEM59L	-2.59192	0.278212	4.46e-15	1.85e-12
HOXC6	-2.60231	0.304987	4.33e-13	1.16e-10
HSPB6	-2.61535	0.211096	1.51e-07	1.1e-05
CACNG8	-2.61607	0.329563	1.84e-07	1.31e-05
CFHR1	-2.6248	0.427404	8.32e-06	0.000349012
MOBP	-2.62699	0.345227	4.83e-07	3.1e-05
ADARB2	-2.63153	0.313567	2.34e-08	2.08e-06
CHRNA3	-2.63207	0.388899	1.08e-05	0.000435157
RP11-659P15.1	-2.63496	0.534384	2.57e-05	0.000915458
HPD	-2.63609	0.291445	1.36e-14	5.12e-12
ZFPM2-AS1	-2.63714	0.430778	5.28e-06	0.00024074
GCK	-2.63715	0.364156	7.7e-08	6.04e-06
DNAH2	-2.63729	0.248182	1.86e-05	0.00069929
RP11-84D1.1	-2.63993	0.57814	0.000687996	0.0140922
RP11-567G11.1	-2.64724	0.851006	0.00161284	0.0287405
RP11-145A3.2	-2.64872	0.348883	5.56e-11	9.35e-09
ANKRD33	-2.6546	0.622471	0.000134345	0.00362947
DRD2	-2.65539	0.313423	4.67e-13	1.24e-10
ELFN1-AS1	-2.66614	0.461864	5.88e-06	0.000264574
LINC01114	-2.68648	0.326122	1.7e-08	1.56e-06
CCDC190	-2.6916	0.426253	1.47e-05	0.000566641
TMPRSS13	-2.69166	0.165157	0.00120337	0.0226042
MYBL2	-2.69332	0.29899	1.71e-14	6.35e-12
LMO7DN-IT1	-2.70578	0.481529	3.36e-07	2.25e-05
PRND	-2.71047	0.37479	6.58e-05	0.00200958
RP11-162I7.1	-2.71214	0.490219	0.00011171	0.00311549
PLCE1-AS1	-2.7175	0.284579	5.54e-16	2.95e-13
NPTX2	-2.72204	0.349288	0.000229233	0.0056833
TGFBR3L	-2.72221	0.385385	1.18e-05	0.000465823
HKDC1	-2.72255	0.342692	4.24e-05	0.00139498
CCDC64B	-2.72672	0.567467	0.00192344	0.0330399
FAM195CP	-2.73703	0.562822	5.16e-06	0.000235519
RP11-715H19.2	-2.75874	0.509118	8.06e-07	4.88e-05
GPM6A	-2.75976	0.313611	0.0029444	0.0468438
CCDC175	-2.76254	0.526227	2.08e-06	0.000108131
DRP2	-2.77346	0.247287	9.67e-05	0.00274754
COL26A1	-2.77719	0.295924	1.04e-15	5.13e-13
GDA	-2.77825	0.396402	0.000138884	0.0037363
GATA6-AS1	-2.78596	0.299732	2.15e-15	9.82e-13
OOEP	-2.78692	0.634378	2.01e-05	0.000743023
AC016768.1	-2.79016	0.360577	1.76e-11	3.44e-09
TMEM130	-2.79852	0.347518	3.05e-18	2.12e-15
PTX3	-2.80759	0.278363	7.87e-11	1.28e-08
OTX1	-2.80985	0.395258	3.85e-10	5.28e-08
PCDH7	-2.8123	0.347487	1.11e-05	0.000444232
MME	-2.81451	0.371999	3.35e-11	6.11e-09
LYPD8	-2.82036	0.642002	4.41e-10	5.97e-08
RP11-268G12.3	-2.82543	0.606636	8.67e-06	0.000361378
CLEC4F	-2.82555	0.311864	8.33e-11	1.34e-08
AC011997.1	-2.83767	0.662508	0.000257	0.00628391
GATA5	-2.84082	0.539672	2.74e-05	0.000962018
GS1-600G8.5	-2.86436	0.485037	3.37e-06	0.000165136
CA3	-2.86589	0.411235	7.86e-12	1.63e-09
LMO7DN	-2.86619	0.40941	5.23e-10	6.99e-08
AQP6	-2.88179	0.309366	0.000578682	0.0122093
NTM	-2.88356	0.321368	8.15e-15	3.21e-12
CTD-2128A3.2	-2.89117	0.596987	1.39e-05	0.000537065
CHRM2	-2.91039	0.581726	8.09e-05	0.00239003
KCNA1	-2.9136	0.408143	0.00135385	0.0249483
RP11-809C18.3	-2.91769	0.566273	0.000445666	0.00984667
CD207	-2.91795	0.320323	3.49e-15	1.5e-12
TMEM8C	-2.92793	0.600074	0.000106917	0.00300134
DRAXIN	-2.93965	0.249773	2.58e-08	2.25e-06
NTF4	-2.94351	0.29603	1.39e-17	9.03e-15
KSR2	-2.95409	0.395579	1.6e-05	0.000607799
HOXA13	-2.95784	0.429153	9.61e-16	4.95e-13
IQCA1L	-2.96578	0.456187	0.0018543	0.0321638
MAG	-2.96622	0.39474	0.00216567	0.0366294
PCP4	-2.96915	0.314185	2.04e-05	0.000750949
PLXNB3	-2.97534	0.256804	8.97e-07	5.35e-05
ESRRG	-2.98485	0.404176	5.4e-11	9.12e-09
SLC22A6	-2.9933	0.562232	8.7e-15	3.38e-12
INMT	-2.99633	0.31291	1e-16	5.72e-14
INS-IGF2	-3.01213	0.496979	2.56e-08	2.25e-06
RP13-487K5.1	-3.01431	0.53451	2.48e-07	1.72e-05
RP11-359P18.6	-3.01819	0.985855	0.000112495	0.0031319
RP11-603B24.1	-3.01914	0.637789	0.000755568	0.0152417
LINC00911	-3.02691	0.499762	3.08e-08	2.65e-06
HBE1	-3.0453	0.255132	2.99e-06	0.000149166
KRTAP13-4	-3.06315	0.497524	3.67e-09	4.07e-07
MYOZ2	-3.079	0.245616	7.6e-05	0.00227234
SH3GL2	-3.08736	0.291711	0.00099046	0.0191455
SLC22A31	-3.08815	0.445181	4.7e-15	1.91e-12
BX255923.3	-3.11782	0.5917	0.000197438	0.00502774
PRKCQ	-3.12429	0.234321	0.00236417	0.0394025
ALDH1A1	-3.14173	0.226104	1.06e-06	6.23e-05
NCAN	-3.14177	0.407792	7.51e-05	0.00225089
LY6H	-3.15155	0.32163	1.88e-06	9.94e-05
RP11-268P4.5	-3.16359	0.555308	0.000359988	0.00828804
RP11-627G23.1	-3.16581	0.455994	4.82e-10	6.47e-08
ARX	-3.16647	0.532256	0.000107374	0.00301034
EMX1	-3.18545	0.537463	0.00303102	0.0479157
CNTN6	-3.19007	0.304729	5.53e-20	4.65e-17
HOXA11-AS	-3.19619	0.596472	8.72e-07	5.24e-05
PDZK1IP1	-3.19801	0.359192	1.82e-11	3.52e-09
RP11-167H9.3	-3.20442	0.612521	2.7e-06	0.000136684
FOXG1	-3.20935	0.535591	1.47e-06	8.2e-05
ADD2	-3.22165	0.279314	1.44e-09	1.73e-07
GSTA1	-3.22254	0.403376	0.000792616	0.0158787
ATP10B	-3.22794	0.512614	9.75e-08	7.5e-06
DUX4L9	-3.23203	0.416992	5.53e-12	1.19e-09
DCC	-3.23638	0.379361	3.14e-14	1.11e-11
S100B	-3.24102	0.35778	1e-15	5.08e-13
LINC01143	-3.24256	0.809918	0.00207308	0.03525
UPK1A	-3.25486	0.295742	0.00189715	0.0326769
SNAP25-AS1	-3.25568	0.664542	0.000103334	0.002915
TECRL	-3.25651	0.82145	0.00118836	0.022375
HOXB13	-3.26219	0.460894	1.25e-22	1.74e-19
CD1A	-3.26387	0.528197	2.49e-06	0.00012766
KRT7	-3.27329	0.377526	0.000627797	0.0130517
DTX1	-3.29872	0.375476	4.43e-08	3.66e-06
NIPAL4	-3.31486	0.454254	0.00242118	0.0400759
FOXJ1	-3.31529	0.578149	0.000959744	0.0186647
TMEM151A	-3.3207	0.380156	2.36e-06	0.000121281
ATP4A	-3.34439	0.712448	0.000745263	0.0150814
DLX2	-3.34618	0.671385	0.00275582	0.0444227
NEFLP1	-3.34643	0.950533	0.000441116	0.00978205
PCAT7	-3.35557	0.64147	5.94e-07	3.75e-05
RP5-978I12.1	-3.3659	0.645111	5.97e-07	3.76e-05
ASIC4	-3.36766	0.298033	1.14e-09	1.43e-07
NPY6R	-3.37131	0.357589	5.76e-24	9.2e-21
Vax2os1_3	-3.37957	0.858684	0.00222625	0.0374557
C11orf87	-3.39186	0.515724	1.41e-08	1.32e-06
C4BPB	-3.40139	0.279617	3.2e-14	1.12e-11
RP11-61O11.1	-3.42794	0.472786	4.68e-05	0.00150829
LINC00844	-3.4288	0.358677	0.000984896	0.0190726
HHATL	-3.43857	0.493771	0.00206024	0.0350878
LY86-AS1	-3.44109	0.463414	0.00270475	0.0438834
RP11-357D18.1	-3.44509	0.509071	5.87e-09	6.21e-07
EDAR	-3.44595	0.387452	2.42e-08	2.14e-06
FAM181B	-3.44701	0.322215	0.000312072	0.00737631
MGAT5B	-3.4486	0.298245	0.000484617	0.0105417
GLRA3	-3.45167	0.793617	0.0011639	0.0219922
RP11-25O3.1	-3.45876	0.782577	0.00112665	0.0213769
FABP7	-3.46658	0.47913	1.85e-07	1.31e-05
LINC01524	-3.48885	0.892713	0.00154136	0.0277297
LRRC15	-3.50742	0.472307	0.000203664	0.00514525
HPR	-3.51646	0.420697	3.7e-14	1.27e-11
TMPRSS3	-3.53669	0.437912	1.52e-06	8.42e-05
AC079776.2	-3.53876	0.410084	5.55e-08	4.45e-06
BCAS1	-3.5404	0.545912	5.62e-06	0.00025497
CDH15	-3.54105	0.377251	0.000153663	0.00406539
XKR4	-3.55316	0.600293	8.83e-05	0.00256004
RP11-509A17.3	-3.57661	0.588348	0.000160649	0.00422223
MGAT4C	-3.57676	0.609212	0.00243367	0.0402248
ANKFN1	-3.57778	0.42084	0.000533844	0.0114181
POU3F2	-3.5787	0.344865	1.09e-06	6.36e-05
B3GAT1	-3.58056	0.288979	3.77e-19	2.8e-16
RP11-359P18.7	-3.58083	0.908173	9.93e-06	0.000405958
LAD1	-3.61617	0.325871	4.22e-11	7.37e-09
NRK	-3.61829	0.577139	0.000869773	0.0171447
HOXA11	-3.61848	0.461689	4.92e-09	5.27e-07
CD70	-3.63032	0.325495	1.43e-07	1.05e-05
PSCA	-3.6365	0.346367	4.09e-06	0.00019518
NDP	-3.63915	0.482913	0.000424723	0.00948438
KREMEN2	-3.64023	0.326117	8.71e-05	0.00252827
DUSP9	-3.64681	0.393881	1.98e-11	3.81e-09
SYT8	-3.66055	0.551073	2.09e-05	0.000765082
RP4-568C11.4	-3.66213	0.42888	1.32e-08	1.25e-06
MAS1	-3.6657	0.485989	4.83e-06	0.000221603
ELAVL4	-3.67309	0.265164	6.32e-07	3.96e-05
TUBB8P12	-3.67714	0.797447	0.00106628	0.0203281
GFRA2	-3.67965	0.302616	7.86e-06	0.00033343
MAP1LC3C	-3.69031	0.352067	7.88e-17	4.66e-14
MYADML2	-3.69873	0.353029	0.00240759	0.0399177
AK5	-3.70529	0.294159	0.000198705	0.00505195
ATP6V0D2	-3.70983	0.544475	8.71e-05	0.00252827
KIF1A	-3.71436	0.305667	2.91e-17	1.82e-14
KCNJ10	-3.71649	0.285469	0.000389604	0.00881731
SLC13A5	-3.73141	0.553672	0.000424184	0.00948438
CTD-2555A7.2	-3.73992	0.661961	8.66e-05	0.00252137
DAO	-3.74734	0.456714	3.68e-14	1.27e-11
KBTBD12	-3.77085	0.257648	0.000202682	0.0051269
RASAL1	-3.77502	0.411038	2.05e-06	0.000107016
RP5-984P4.6	-3.78228	0.756845	0.000153981	0.00406928
DLK1	-3.78262	0.589346	0.00187603	0.0324701
FAM57B	-3.82544	0.37002	8.97e-09	8.97e-07
CYP26A1	-3.84663	0.392614	5.34e-15	2.13e-12
PERM1	-3.85085	0.287088	4.36e-05	0.00143027
CTNNA2	-3.86139	0.498977	2.95e-10	4.22e-08
SNX18P27	-3.87588	0.772521	4.42e-07	2.86e-05
DMRT2	-3.90342	0.883907	0.00164387	0.0291505
RP11-236B18.2	-3.90803	0.442296	3.98e-13	1.08e-10
LAMP5-AS1	-3.91335	0.73939	1.98e-06	0.000103937
KCNN1	-3.91811	0.297624	1.05e-08	1.03e-06
FAM69C	-3.91974	0.394925	7.82e-07	4.76e-05
RP13-766D20.4	-3.92858	0.509865	6.71e-05	0.00204588
RP11-473E2.4	-3.93627	0.826624	0.000174893	0.00454054
TLX2	-3.93788	0.638118	2.64e-05	0.000932207
TLX1NB	-3.94562	0.608002	7.72e-10	1.01e-07
DLX1	-3.95021	0.392259	9.5e-10	1.23e-07
ITLN1	-3.96735	0.455472	2.32e-15	1.03e-12
SYNGR3	-3.9715	0.294493	1.2e-24	2.13e-21
L1CAM	-3.9732	0.310569	1.8e-15	8.32e-13
PAX1	-3.99985	1.13623	0.00044362	0.00981712
LINC00632	-4.00898	0.458074	1.23e-07	9.26e-06
GFAP	-4.01983	0.441276	4.93e-11	8.41e-09
IGF2BP1	-4.01991	0.403615	3.15e-11	5.81e-09
SCG3	-4.0435	0.333386	0.000218924	0.00547895
XIRP1	-4.04577	0.390535	0.000811319	0.0162025
RP11-865I6.2	-4.04682	0.412934	0.000674296	0.0138739
OLIG1	-4.06937	0.353278	4.81e-09	5.17e-07
ATP1A3	-4.07265	0.321756	1.95e-05	0.000724894
BRINP3	-4.11285	0.777804	0.00147098	0.0266587
TLX1	-4.11292	0.470134	5.14e-12	1.12e-09
ADRA1D	-4.11305	0.342399	2.44e-27	5.99e-24
ANKRD2	-4.13815	0.448382	0.00274065	0.0442676
TRIML2	-4.15424	0.402541	0.000586446	0.0123204
RP11-359P18.5	-4.17947	0.95626	0.000357599	0.0082477
BCYRN1	-4.18122	0.27439	1.3e-10	1.98e-08
PAX2	-4.18996	0.491104	4.05e-25	7.61e-22
LPO	-4.19379	0.412567	2.49e-05	0.000887243
HOXD13	-4.21344	0.578273	5.48e-12	1.19e-09
CDK5R2	-4.24029	0.358127	9.05e-05	0.00260825
WDR72	-4.26559	0.697319	0.00217029	0.036688
KCNQ5	-4.29456	0.397377	0.000168902	0.00441372
HOXA7	-4.29509	0.733518	1.01e-08	9.92e-07
SYT13	-4.29983	0.35008	2.67e-07	1.83e-05
CEND1	-4.33029	0.287091	4.71e-15	1.91e-12
MEPE	-4.34838	0.598123	4.09e-06	0.00019518
HOXC-AS3	-4.35077	0.576885	7.46e-06	0.000319084
CXCL6	-4.37587	0.519822	0.000666509	0.0137499
STMN4	-4.40312	0.426577	0.00167444	0.0296068
PTPRQ	-4.43067	0.436788	0.000122903	0.00337248
NR2E1	-4.45123	0.397591	1.27e-07	9.44e-06
MURC	-4.4624	0.251834	0.000722803	0.0146758
XXyac-YM21GA2.7	-4.47279	0.826454	6.67e-05	0.00203383
ASB2	-4.47412	0.223477	4.22e-06	0.000200336
LINC01514	-4.48021	0.637241	2.17e-11	4.16e-09
PRAC2	-4.4823	0.497235	4.8e-20	4.14e-17
ICAM5	-4.49667	0.3861	5.08e-24	8.53e-21
TUBB4A	-4.50358	0.306834	1.19e-09	1.48e-07
CXCL5	-4.56089	0.404598	1.58e-05	0.000599652
SCRT2	-4.57049	0.795542	0.00296653	0.047106
RP11-362K2.2	-4.57888	0.561617	3.8e-12	8.74e-10
CCKAR	-4.59435	0.525875	1.15e-31	4.58e-28
HOXA10	-4.60229	0.399248	3.15e-26	7.18e-23
CCNYL2	-4.61312	0.897603	0.000334786	0.00781485
TNR	-4.63095	0.512186	0.00168484	0.0297577
IGFN1	-4.63636	0.3776	8.85e-09	8.91e-07
RP11-767I20.1	-4.66526	0.359475	5.2e-32	2.37e-28
NKX6-2	-4.67442	0.556901	1.04e-06	6.1e-05
HOXC13-AS	-4.72191	0.641038	3.56e-11	6.45e-09
NKX2-5	-4.76096	0.579434	4.31e-14	1.45e-11
DUX4	-4.76353	0.852004	8.83e-07	5.28e-05
CYP4F44P	-4.78684	0.877833	1.66e-07	1.2e-05
RLBP1	-4.79649	0.750203	0.00173601	0.0305096
AC012531.25	-4.80303	0.610597	1.78e-11	3.46e-09
LHX2	-4.80578	0.469137	4.19e-06	0.000199221
RAB25	-4.88256	0.452909	9.32e-05	0.00266775
RP11-834C11.6	-4.92015	0.538971	1.2e-13	3.73e-11
LINC00461	-4.92978	0.665912	7.33e-06	0.000314706
TTYH1	-4.94335	0.321658	3.37e-13	9.28e-11
GRIA4	-4.94427	0.366013	6.62e-06	0.000290955
SST	-4.94718	0.623649	0.000154087	0.00406928
ALPK2	-4.95036	0.31523	3.86e-26	8.22e-23
C1QL4	-4.97181	0.459349	2.41e-07	1.67e-05
ATP2B3	-4.99006	0.362785	1.48e-12	3.66e-10
HEPACAM	-4.99172	0.430419	3.56e-08	3.02e-06
C1orf87	-5.00152	0.766767	0.00041372	0.00930531
GNG3	-5.02167	0.280687	0.00237648	0.0395251
RXRG	-5.0228	0.503901	1.94e-09	2.27e-07
LINC00634	-5.05516	0.443357	0.00113955	0.0216087
MYOZ1	-5.05682	0.187705	7.06e-06	0.000306826
RP11-398J10.2	-5.0655	0.405679	3.1e-13	8.7e-11
DUSP26	-5.11735	0.360983	4.9e-14	1.63e-11
PTPRZ1	-5.11824	0.588217	1.89e-08	1.71e-06
SHD	-5.12982	0.452604	5.04e-07	3.22e-05
WNT7A	-5.1344	0.969157	0.000532478	0.0113965
RP11-357H14.17	-5.19086	0.596103	1.13e-06	6.55e-05
ENO3	-5.21635	0.126799	5.96e-05	0.0018468
DDN	-5.22586	0.290849	8e-05	0.00236422
IGHV5-78	-5.26865	0.639222	0.00012062	0.00332622
AC092484.1	-5.27174	0.969887	0.00075436	0.0152269
OLIG2	-5.31989	0.504108	2.95e-09	3.37e-07
MLC1	-5.33239	0.388505	2.62e-11	4.89e-09
PMP2	-5.35755	0.739506	6.03e-06	0.000269738
COL20A1	-5.36534	0.415414	1.12e-10	1.72e-08
HOXC13	-5.36771	0.565486	4.02e-09	4.42e-07
GAD1	-5.3679	0.397971	0.000103276	0.002915
C1orf61	-5.37814	0.420483	6.03e-11	9.98e-09
HOXC-AS2	-5.38457	0.507031	2.73e-14	9.79e-12
PITX2	-5.41825	0.662344	5.24e-08	4.23e-06
WT1	-5.44036	0.652859	2.5e-07	1.73e-05
LINC01436	-5.50298	0.458303	1.89e-29	6.71e-26
HOXC8	-5.52229	0.463466	8.09e-29	2.35e-25
RPH3A	-5.52562	0.403902	5.65e-10	7.51e-08
ATP2B2	-5.55491	0.286078	7.1e-13	1.86e-10
HAND2-AS1	-5.59391	0.890379	1.13e-05	0.000451014
RP11-197K6.1	-5.61081	0.844644	2.78e-06	0.000139915
SHOX	-5.61407	0.628993	0.000505786	0.0109204
SLC6A7	-5.61693	0.48746	0.000178516	0.00463082
AC008060.7	-5.65551	0.628608	9.32e-07	5.53e-05
LAMP5	-5.80882	0.342748	9.2e-56	2.94e-51
ADCY8	-5.81323	0.813674	0.000366399	0.00840534
CLEC2A	-5.81674	0.589599	8.78e-15	3.38e-12
HAND2	-5.85291	0.789434	1.36e-06	7.69e-05
ASB4	-5.8627	0.490739	5.97e-05	0.00185005
SYNPO2L	-5.89349	0.193366	0.00247668	0.040746
RP5-912I13.1	-5.97747	0.548413	1.06e-11	2.18e-09
SOX1	-6.03986	0.92576	3.88e-05	0.00130003
GRIA2	-6.04984	0.621899	0.000393332	0.00888909
SPAG6	-6.07475	0.510553	0.000191431	0.00490606
TRIM54	-6.08082	0.511161	1.91e-07	1.35e-05
PLEKHS1	-6.08331	0.497198	0.000378869	0.00863556
CTD-2377D24.6	-6.09373	0.360062	2.8e-12	6.68e-10
HOXC9	-6.13357	0.411679	3.74e-44	3.98e-40
F5	-6.13803	0.372118	7.99e-38	5.1e-34
OTOR	-6.17691	0.640463	1.22e-06	6.99e-05
SOX2	-6.21696	0.522426	1.67e-07	1.2e-05
PAX3	-6.2441	0.840454	0.00242215	0.0400759
CHI3L1	-6.30727	0.40184	2.84e-12	6.72e-10
CACNG7	-6.35871	0.743297	1.43e-07	1.05e-05
COMP	-6.39124	0.31462	1.48e-07	1.08e-05
HOXC-AS1	-6.43077	0.590493	9.38e-28	2.5e-24
CPLX2	-6.44758	0.616071	5.53e-05	0.00173464
SMCO1	-6.47514	0.506852	2.66e-06	0.000135178
LRRTM4	-6.62256	0.719554	1.59e-11	3.15e-09
HSPB3	-6.62641	0.758941	0.000965921	0.018762
SVOP	-6.64127	0.599998	4.87e-05	0.00156045
HOTAIR	-6.76616	0.789888	1.59e-07	1.15e-05
HOXB9	-6.81912	0.782331	1.5e-07	1.09e-05
MYOT	-6.82379	0.277537	0.000201424	0.00510482
SNAP25	-6.84534	0.409684	1.69e-06	9.05e-05
KCNQ2	-6.85156	0.49033	0.000472744	0.0103278
PRAME	-6.87498	0.717673	7.51e-18	5.1e-15
HOXC10	-6.93389	0.534469	1.51e-21	1.61e-18
TERT	-6.94158	1.18247	0.000639812	0.0132619
TBR1	-7.04991	0.7377	1.05e-05	0.000425282
SLN	-7.07475	0.575559	0.0010436	0.0199912
KRT4	-7.13224	0.414592	4.22e-12	9.56e-10
SCN1A	-7.25453	0.804454	0.00046875	0.0102595
BCAN	-7.36291	0.400233	3.76e-23	5.45e-20
HOXC11	-7.4195	0.747804	8.8e-11	1.38e-08
SNCB	-7.51665	0.404006	0.00102794	0.0197266
GATA4	-7.53722	0.920074	5.14e-08	4.18e-06
MYL2	-7.77799	0.482491	0.00152684	0.0275306
TNNI1	-7.81391	0.324604	3.26e-25	6.51e-22
HOXC12	-8.07686	1.21573	4.66e-06	0.000216219
MYO18B	-8.17346	0.973703	0.000429451	0.00958327
CASQ1	-8.29233	0.268084	1.81e-07	1.3e-05
RNA5-8S5	-8.42376	1.06265	7.32e-05	0.00220436
MYBPC1	-9.13793	0.364124	3.66e-07	2.42e-05
SMPX	-9.21907	0.58589	1.92e-13	5.77e-11
[truncated: 6 more rows]
