# Supplementary material for: Meningioma epigenetic grouping reveals biologic drivers and therapeutic vulnerabilities
Source: Research Square preprint supplement (doi:10.21203/rs.3.rs-113172/v1), 2020-12-09
Supplement: Supplementary file 7 [file dd2ac427a9f8de42b7c7460b.xlsx]

## Sheet: sgNF2_vs_sgNTC
Extended Data Table 5. Differentially expressed genes in M10G-dCas9-KRAB cells.
Gene	log2FoldChange	lfcSE	pvalue	padj
NF2	-12.5641	0.164553	0	0
OAS2	-6.13819	0.130145	0	0
OAS1	-5.06532	0.0983661	0	0
IFIT1	-4.65801	0.0977179	1.04572e-306	8.72861e-303
IFI44L	-3.68675	0.0729031	3.41294e-298	2.27903e-294
MX2	-6.64059	0.155931	4.36937e-287	2.43141e-283
IFI44	-3.6554	0.0781719	2.2874e-253	1.09103e-249
IFIT3	-3.51562	0.0855995	1.41171e-190	5.89177e-187
ISG15	-4.62897	0.123503	1.7292e-190	6.41496e-187
DDX58	-3.30196	0.0889949	1.94882e-148	6.50674e-145
OAS3	-3.66785	0.106829	1.66511e-138	5.05406e-135
STAT1	-2.97246	0.0795666	3.35274e-136	9.32845e-133
OASL	-5.4743	0.187525	2.53438e-126	6.50906e-123
IFIT2	-3.29853	0.102381	2.06297e-112	4.91988e-109
IFI6	-4.98262	0.186105	1.57844e-102	3.5134e-99
SAMHD1	-2.57956	0.0789339	8.96675e-90	1.87114e-86
IFIH1	-3.04468	0.105644	3.59862e-84	7.06769e-81
HERC6	-2.7431	0.0906462	3.6047e-83	6.68633e-80
HELZ2	-3.08755	0.112277	9.36882e-78	1.64635e-74
PLSCR1	-2.46218	0.0810299	1.84122e-73	3.07373e-70
BST2	-2.87975	0.107381	2.78625e-69	4.42987e-66
HERC5	-2.83528	0.109296	4.61427e-64	7.00278e-61
DDX60	-2.65507	0.101366	1.21343e-60	1.76148e-57
IRF7	-3.04402	0.125397	1.71587e-60	2.38706e-57
DDX60L	-2.32377	0.0816622	1.00001e-59	1.33554e-56
PARP14	-2.28615	0.0802254	1.77855e-58	2.28393e-55
EPSTI1	-4.25501	0.211523	6.34203e-54	7.84251e-51
IFITM1	-5.10309	0.269391	3.50173e-53	4.17556e-50
PARP9	-2.13258	0.0765909	4.4741e-50	5.15107e-47
SAMD9L	-2.10767	0.0793395	6.66277e-45	7.41522e-42
USP18	-3.77287	0.200147	2.86723e-44	3.0881e-41
IFI27	-4.90888	0.308334	1.1812e-37	1.23243e-34
SAMD9	-2.34875	0.107884	1.47859e-36	1.49598e-33
IFI35	-2.11214	0.0970421	5.99767e-31	5.88971e-28
RTP4	-2.83065	0.161127	1.34578e-30	1.2838e-27
PARP10	-2.42152	0.128082	2.8918e-29	2.68198e-26
TRIM14	-1.93185	0.0841205	4.55722e-29	4.11234e-26
DTX3L	-1.8505	0.0774541	1.39187e-28	1.22295e-25
GBP1	-1.89093	0.0925056	1.87528e-22	1.60543e-19
XAF1	-4.97443	0.418531	3.41017e-22	2.84647e-19
CXCL8	-4.26756	0.343705	9.60319e-22	7.82027e-19
PARP12	-1.82746	0.0898996	1.13387e-20	9.01374e-18
PNPT1	-1.84055	0.0937947	1.05535e-19	8.19442e-17
EIF2AK2	-1.73268	0.0867096	1.04508e-17	7.93024e-15
TRIM25	-1.52182	0.0635092	9.3965e-17	6.97179e-14
SLC15A3	-2.89116	0.253826	2.18138e-14	1.5833e-11
GBP4	-1.92598	0.130367	3.89819e-13	2.7692e-10
RP11-288L9.4	-6.24855	0.736276	1.05254e-12	7.32131e-10
UBE2L6	-1.61525	0.0901916	4.25577e-12	2.89983e-09
IFIT5	-1.61802	0.0911621	4.41136e-12	2.94573e-09
ATF3	-2.02475	0.153117	6.28503e-12	4.1146e-09
GBP5	-3.11081	0.318606	7.98158e-12	5.12479e-09
THEMIS2	-2.39464	0.211124	8.62772e-12	5.43514e-09
TAP1	-1.60373	0.0919665	2.18503e-11	1.351e-08
HSH2D	-4.47549	0.553195	1.11879e-10	6.79164e-08
SP110	-1.87153	0.141638	2.51138e-10	1.49732e-07
BATF2	-1.77676	0.132623	1.65733e-09	9.70788e-07
LY6E	-1.92752	0.186193	1.82198e-07	0.000104883
ISG20	-2.22229	0.255145	4.08682e-07	0.000231272
TRIM69	-1.37191	0.0777648	9.34596e-07	0.000520071
RSAD2	-6.46437	1.2738	1.00572e-06	0.000550474
ZBP1	-7.42336	2.64567	2.385e-06	0.00128436
GBP1P1	-2.10865	0.251436	2.87995e-06	0.00151382
TNFRSF10D	1.35404	0.0777001	2.90178e-06	0.00151382
LAP3	-1.35245	0.0787821	4.21788e-06	0.00216055
C19orf66	-1.47817	0.107818	4.27088e-06	0.00216055
IFITM3	-1.50742	0.115186	4.69283e-06	0.00233857
HLA-F	-1.72989	0.176539	1.2374e-05	0.00607564
DHX58	-1.9033	0.223529	1.56796e-05	0.00758708
LGALS9	-3.3731	0.624152	3.12897e-05	0.0149243
PHF11	-1.36389	0.0905664	3.17422e-05	0.0149269
STAT2	-1.46751	0.118303	3.51653e-05	0.0163069
ZNFX1	-1.28996	0.0718454	3.58001e-05	0.0163739
TRIM21	-1.28601	0.0714434	3.82873e-05	0.0172748
USP41	-4.98308	1.0009	4.44467e-05	0.0197865
LGALS17A	-6.51551	2.57978	6.13177e-05	0.0269378
GDF15	-2.8256	0.507076	6.63826e-05	0.0287842

## Sheet: sgNF2+NF2-reexpression_vs_sgNF2
Gene	log2FoldChange	lfcSE	pvalue	padj
NF2	5.14155	0.165698	2.01908e-138	2.19455e-135
ZBP1	7.40665	2.48635	1.48914e-06	0.000141623
MX2	7.14221	0.155728	0	0
RSAD2	8.07423	1.27944	6.3086e-10	7.82575e-08
RP11-288L9.4	6.62704	0.732258	2.20336e-14	3.49248e-12
OAS2	6.92777	0.129695	0	0
OASL	5.77609	0.186767	1.16641e-144	1.47907e-141
IFITM1	6.42964	0.26854	1.3327e-91	1.01396e-88
OAS1	5.46141	0.0981184	0	0
USP41	5.61074	0.989964	3.14065e-06	0.000284466
IFI6	5.96795	0.185923	3.27933e-158	4.40299e-155
XAF1	6.702	0.414783	8.86772e-44	3.55098e-41
IFI27	6.48466	0.30657	2.51159e-72	1.54938e-69
IFIT1	4.92332	0.0975867	0	0
ISG15	5.41473	0.123168	6.02781e-282	1.71981e-278
HSH2D	4.31602	0.550038	5.686e-10	7.09196e-08
CXCL8	9.33525	0.335982	4.9588e-135	5.14476e-132
EPSTI1	4.63661	0.209102	3.67251e-68	2.14936e-65
USP18	4.27071	0.197365	3.20412e-62	1.70079e-59
IFI44L	4.13424	0.0725728	0	0
OAS3	4.30178	0.106699	3.98585e-211	8.27064e-208
IFI44	3.82904	0.077632	3.38996e-291	1.10537e-287
IFIT3	3.7374	0.0855282	3.6501e-226	8.33135e-223
LGALS9	4.52587	0.60366	1.43133e-09	1.73777e-07
DDX58	3.50075	0.0885765	2.95547e-176	4.81847e-173
IFIT2	3.10582	0.102185	4.47825e-95	3.52469e-92
GBP5	4.27128	0.307529	5.61071e-27	1.35778e-24
HELZ2	3.13264	0.112081	1.93074e-81	1.33543e-78
IFIH1	3.25741	0.105038	3.95304e-103	3.34178e-100
IRF7	3.35465	0.123885	2.53852e-81	1.70417e-78
STAT1	3.20515	0.0794432	1.65286e-170	2.51511e-167
SLC15A3	4.28178	0.244983	1.57555e-41	6.09525e-39
BST2	4.75506	0.10617	1.41635e-274	3.59203e-271
HERC5	2.85585	0.10846	2.34484e-66	1.33802e-63
RTP4	3.01226	0.158563	1.56764e-37	5.34052e-35
GDF15	3.73363	0.486777	4.3797e-09	5.02345e-07
HERC6	3.29111	0.0901106	1.58931e-143	1.90927e-140
DDX60	2.7241	0.100909	4.06648e-66	2.26384e-63
SAMHD1	3.12078	0.0785137	2.21958e-161	3.16637e-158
PLSCR1	2.68088	0.0804489	1.31328e-97	1.07056e-94
PARP10	3.02386	0.127216	6.53663e-58	2.98397e-55
THEMIS2	2.25558	0.208457	4.54069e-10	5.72604e-08
SAMD9	2.76423	0.107594	5.20858e-61	2.64191e-58
DDX60L	2.25388	0.0812735	2.7247e-54	1.15169e-51
PARP14	2.30932	0.0800054	8.55627e-61	4.24558e-58
ISG20	3.08372	0.24597	4.80871e-18	8.71101e-16
PARP9	2.37123	0.0761555	4.4291e-73	2.80817e-70
IFI35	2.63419	0.0961264	1.9645e-65	1.06761e-62
GBP1P1	2.99469	0.239201	1.86952e-17	3.35999e-15
SAMD9L	2.76282	0.0788921	2.66851e-111	2.43635e-108
ATF3	3.109	0.145734	3.41185e-48	1.39063e-45
TRIM14	1.94528	0.0836168	3.99621e-30	1.0731e-27
LY6E	2.93043	0.18481	2.73369e-26	6.43262e-24
GBP4	2.96858	0.125435	4.20575e-56	1.84608e-53
DHX58	2.29373	0.221465	1.28499e-09	1.57687e-07
GBP1	2.48795	0.0905876	2.85613e-61	1.48162e-58
SP110	1.86214	0.138302	1.71215e-10	2.23313e-08
DTX3L	1.94146	0.0770973	1.07145e-34	3.44448e-32
PNPT1	1.94954	0.0930221	5.88294e-25	1.34278e-22
PARP12	2.01599	0.0890261	1.15154e-30	3.16674e-28
BATF2	1.98437	0.129156	8.16837e-15	1.33174e-12
EIF2AK2	1.75862	0.0864703	6.78802e-19	1.30199e-16
HLA-F	2.97249	0.170608	1.2742e-31	3.68147e-29
IFIT5	1.83086	0.0902611	1.21166e-20	2.40489e-18
UBE2L6	1.89328	0.0897483	7.86608e-24	1.77766e-21
TAP1	2.04712	0.0911702	5.11788e-31	1.46019e-28
TRIM25	1.49035	0.0631688	4.13171e-15	6.78462e-13
IFITM3	2.28934	0.114657	6.50194e-30	1.72566e-27
C19orf66	1.66958	0.106798	1.53425e-10	2.036e-08
STAT2	1.68129	0.117844	3.05025e-09	3.55214e-07
TRIM69	1.38731	0.0769031	2.71108e-07	2.80001e-05
PHF11	1.60916	0.0879104	1.94854e-12	2.90688e-10
LAP3	1.9123	0.0775114	1.9064e-32	5.80181e-30
ZNFX1	1.37776	0.0714459	7.31282e-08	7.83639e-06
TRIM21	1.34423	0.0705883	6.25487e-07	6.18041e-05
TNFRSF10D	-2.03363	0.0778	8.96102e-41	3.40892e-38
BDKRB2	4.48644	0.289428	5.08616e-34	1.61238e-31
RELB	2.85432	0.156015	3.46079e-33	1.08209e-30
COL5A2	1.84661	0.0718043	1.00904e-32	3.11234e-30
BCHE	-2.79841	0.153354	2.00536e-32	6.02268e-30
CXCL3	4.41928	0.293594	7.52648e-32	2.23106e-29
FHL1	-3.08073	0.179645	1.17511e-31	3.43871e-29
LSAMP	1.97171	0.0846126	5.47023e-31	1.54146e-28
CYFIP2	-2.21393	0.106034	7.42679e-31	2.06727e-28
RGS2	2.30447	0.115329	3.24135e-30	8.8076e-28
PTGS2	4.4614	0.31112	2.01613e-29	5.28944e-27
APOL1	2.07438	0.0963631	2.23188e-29	5.78893e-27
CMKLR1	2.117	0.101574	1.18263e-28	3.03298e-26
HSPA12A	-2.54759	0.140993	1.37726e-28	3.49288e-26
APCDD1L-AS1	2.6763	0.154566	5.46336e-28	1.37034e-25
PGM5	-2.576	0.146331	1.16915e-27	2.90063e-25
IGFBP3	1.9302	0.0869781	3.20212e-27	7.85896e-25
MSC	2.43405	0.134844	5.65122e-27	1.35778e-24
SPANXD	-3.79303	0.264974	1.56442e-26	3.71958e-24
RND3	1.96442	0.0926103	6.8671e-26	1.5994e-23
RSPO3	2.41113	0.136551	1.41705e-25	3.26709e-23
HLA-B	2.73268	0.177814	1.7598e-23	3.93798e-21
DNAH11	-2.30446	0.133889	4.27325e-23	9.4696e-21
CYSLTR2	4.52579	0.361155	5.08451e-23	1.1159e-20
C1R	2.09473	0.112879	9.60163e-23	2.08721e-20
COL5A3	5.85825	0.49717	1.16556e-22	2.5098e-20
TNFSF10	2.66886	0.173245	1.51546e-22	3.23275e-20
SPANXA1	-3.86844	0.299411	2.18558e-22	4.61906e-20
CEMIP	2.08226	0.115462	2.14791e-21	4.49779e-19
NFKBIA	1.82344	0.0879997	3.1215e-21	6.4771e-19
TLR3	2.19558	0.12849	3.51234e-21	7.22244e-19
TNFSF18	3.16997	0.235106	5.33626e-21	1.0875e-18
ST6GAL1	-3.10949	0.230211	1.06313e-20	2.14743e-18
HAS2	2.21544	0.132461	1.16025e-20	2.32304e-18
CSGALNACT1	2.53093	0.169296	3.84137e-20	7.55855e-18
ZC3H12A	2.33275	0.150486	2.15613e-19	4.20629e-17
NFASC	-1.76834	0.0864965	2.41372e-19	4.66892e-17
UNC5B	2.32443	0.152042	8.22409e-19	1.56429e-16
TFPI2	1.69246	0.0796175	1.26421e-18	2.38477e-16
IL13RA2	3.34925	0.272071	1.71155e-18	3.18589e-16
CXCL2	4.97007	0.458243	1.71682e-18	3.18589e-16
CTSS	2.35596	0.158342	2.7284e-18	5.02224e-16
GPRC5B	1.8707	0.101556	3.67704e-18	6.71427e-16
FAM105A	4.57134	0.434167	6.72395e-17	1.19902e-14
FRMPD4	-1.94025	0.116581	2.55888e-16	4.52762e-14
COLEC12	-2.12913	0.140384	2.68193e-16	4.70885e-14
ADGRF5	-1.64513	0.080818	6.07057e-16	1.05772e-13
ANGPT1	1.78346	0.0991058	1.00251e-15	1.73351e-13
B2M	1.66983	0.0848486	1.2341e-15	2.11792e-13
PLEKHA4	1.84696	0.107587	1.28688e-15	2.19202e-13
SH3PXD2B	1.91445	0.116418	1.31497e-15	2.20813e-13
COL6A2	2.61213	0.206083	1.31569e-15	2.20813e-13
FBN2	-1.64405	0.0825165	2.45015e-15	4.0821e-13
SCN5A	-4.00071	0.391187	3.29438e-15	5.44885e-13
DACT1	3.73979	0.36337	1.18082e-14	1.9115e-12
COL6A1	1.64897	0.0855879	1.44453e-14	2.32193e-12
TAP2	1.63213	0.083455	1.57026e-14	2.50637e-12
LINC00668	-3.75387	0.373409	4.28554e-14	6.74603e-12
H1F0	3.30598	0.314725	4.6504e-14	7.27024e-12
ANXA10	2.45698	0.199315	6.56618e-14	1.01954e-11
POSTN	1.66318	0.0901083	7.84067e-14	1.20921e-11
SAMD12	-2.18109	0.16364	1.25021e-13	1.91517e-11
IGFALS	-4.11359	0.432246	2.05888e-13	3.13292e-11
OOSP1	-3.43083	0.344316	3.3803e-13	5.10963e-11
TNFRSF9	5.79155	0.67676	1.10492e-12	1.65919e-10
SLCO1A2	-2.09769	0.160395	2.10562e-12	3.12083e-10
HIST1H1C	1.82934	0.121065	2.71276e-12	3.99476e-10
EMILIN1	2.46325	0.21768	4.50725e-12	6.59474e-10
HTR7	1.82394	0.121596	4.56833e-12	6.64154e-10
C1QTNF1	2.0293	0.152787	5.12441e-12	7.40283e-10
UGT1A1	3.2428	0.338696	7.77233e-12	1.11574e-09
LGALS3BP	1.64995	0.0972243	8.98198e-12	1.28134e-09
RP11-844P9.2	-2.18837	0.17976	1.10614e-11	1.56818e-09
HLA-C	1.60643	0.092813	2.12327e-11	2.99159e-09
EPHB1	1.68035	0.104127	2.75625e-11	3.8596e-09
PRDM1	2.06774	0.164857	2.83462e-11	3.94514e-09
ELOVL2	-3.45798	0.391511	5.49713e-11	7.60437e-09
CXCL1	8.50744	1.28473	5.81569e-11	7.99657e-09
ITGA2	1.54071	0.0847493	8.21013e-11	1.12204e-08
UGT1A10	2.33986	0.212869	8.25863e-11	1.12204e-08
SLC2A5	2.05191	0.16667	8.97659e-11	1.21237e-08
PDGFD	3.71614	0.438099	1.35925e-10	1.825e-08
L1CAM	-1.98693	0.158091	1.4536e-10	1.94026e-08
PPL	-2.17406	0.189381	1.56041e-10	2.05875e-08
CYTIP	1.93319	0.149923	1.65514e-10	2.17119e-08
DIO2	2.34105	0.218035	2.04542e-10	2.64728e-08
DSC3	-1.93995	0.151818	2.05287e-10	2.64728e-08
IL1A	2.53853	0.251616	2.26296e-10	2.90181e-08
BIRC3	2.43614	0.236252	2.64652e-10	3.37469e-08
IDO1	1.82715	0.134766	3.09361e-10	3.92286e-08
DCAF8L2	-2.04018	0.172374	4.59989e-10	5.76881e-08
CP	4.20327	0.547249	1.10822e-09	1.36731e-07
FN1	1.3926	0.0658332	1.41044e-09	1.72157e-07
SUSD6	1.70477	0.119417	1.51795e-09	1.83319e-07
ADCY2	-2.03079	0.176836	1.69786e-09	2.03966e-07
CTD-2354A18.1	-3.1261	0.369985	1.73703e-09	2.0758e-07
CFH	1.4905	0.0832844	1.90722e-09	2.26731e-07
GBP2	1.70925	0.121176	1.96707e-09	2.32634e-07
CD69	1.66084	0.113001	2.08614e-09	2.45444e-07
NUGGC	3.1383	0.373562	2.44952e-09	2.86719e-07
IRAK2	1.57216	0.099009	3.30405e-09	3.82817e-07
GRIP2	5.94102	0.841675	4.13897e-09	4.77131e-07
SPANXN4	-2.64367	0.29886	7.31922e-09	8.35306e-07
GGT5	3.49007	0.453466	9.06433e-09	1.02932e-06
SPOCK3	1.50425	0.0897036	9.27759e-09	1.04832e-06
FPR3	2.03561	0.188672	1.31334e-08	1.4767e-06
PCDH10	1.4001	0.0716352	1.32732e-08	1.4851e-06
C3AR1	2.8555	0.345089	1.73114e-08	1.92748e-06
SERPINE1	1.33878	0.0606399	1.78398e-08	1.97666e-06
ITGB4	-1.94013	0.172813	1.8011e-08	1.986e-06
RP11-238K6.1	-5.69246	0.841075	1.90672e-08	2.09235e-06
NCAM2	-4.85347	0.706949	2.79399e-08	3.05133e-06
GCH1	2.0463	0.199896	4.88353e-08	5.30793e-06
CXCL16	1.82651	0.157382	5.58067e-08	6.03691e-06
NFKBIZ	1.68625	0.131422	7.25538e-08	7.81151e-06
RPS6P12	-4.97207	0.759703	8.25719e-08	8.80702e-06
HIST1H2AC	1.67528	0.130254	8.93337e-08	9.48391e-06
KRT81	-2.83437	0.366889	1.26398e-07	1.33567e-05
HES1	1.6222	0.12239	1.60346e-07	1.68658e-05
FGF7	4.95096	0.779516	1.78233e-07	1.86614e-05
EPYC	8.10361	2.62478	1.92838e-07	2.00983e-05
PDE1C	-1.50943	0.101897	2.69435e-07	2.79539e-05
ANGPTL4	1.56706	0.113909	3.08776e-07	3.17469e-05
KAZN	-3.18626	0.455691	3.33854e-07	3.41714e-05
VAV3	-1.64211	0.130221	3.50667e-07	3.5732e-05
CSF2	3.54708	0.528929	3.54772e-07	3.59896e-05
IL32	3.49985	0.525657	4.07683e-07	4.11742e-05
TNFSF15	1.6706	0.137246	4.1921e-07	4.21518e-05
ADAR	1.30072	0.0603179	4.51223e-07	4.51718e-05
LAMA1	-1.97482	0.202983	4.83748e-07	4.82164e-05
NLRC5	1.59621	0.123373	5.98075e-07	5.93524e-05
CFB	2.86126	0.398443	6.29387e-07	6.19214e-05
GNGT2	-3.93976	0.630101	7.75514e-07	7.59704e-05
ADAMTS2	-1.54901	0.115493	9.28673e-07	9.05853e-05
FOS	2.09314	0.234746	9.38722e-07	9.11758e-05
SLC1A3	2.71306	0.37294	1.00251e-06	9.69591e-05
DUSP8	2.87115	0.409404	1.0223e-06	9.84556e-05
FAM84A	-3.24826	0.492692	1.27588e-06	0.000122361
CMPK2	7.50848	2.52537	1.35206e-06	0.000129125
RP1-152L7.5	-1.47903	0.102725	1.5523e-06	0.000147017
SEC14L6	-2.18193	0.260745	1.58639e-06	0.000149625
SAMSN1	-2.53997	0.343574	1.65055e-06	0.00015479
KLHDC7B	6.57594	1.33	1.65471e-06	0.00015479
RGS9	-2.35011	0.302163	2.11423e-06	0.000196968
SULT1C2	-3.32321	0.527362	2.37674e-06	0.000220404
APOL6	1.42276	0.0920731	2.3851e-06	0.000220404
HIST2H2BE	1.69144	0.153187	2.5333e-06	0.000233155
CNTNAP2	-3.497	0.5694	2.58363e-06	0.000236833
PTGES	2.1984	0.27038	2.70205e-06	0.000246697
TNFSF13B	3.17627	0.499434	2.77894e-06	0.000252706
SLC9A9	-2.61982	0.371804	3.33863e-06	0.000301203
KLKP1	7.2917	2.52343	3.7568e-06	0.000337594
PPM1K	1.41771	0.0934684	4.30363e-06	0.000385217
RUNX1T1	-7.26747	2.63566	5.14934e-06	0.000459116
LINC01224	-2.22239	0.286842	5.25581e-06	0.000466786
COL4A3	-1.7403	0.171112	5.74094e-06	0.000507895
DOK3	2.08082	0.254425	6.26541e-06	0.000552154
NRP2	1.35217	0.0800015	6.34427e-06	0.000556954
SPP1	1.26277	0.0593599	6.46363e-06	0.000565258
TDRD7	1.40958	0.0935795	6.56283e-06	0.000571743
IL4I1	3.49012	0.605519	8.34643e-06	0.000724362
MAGEA3	-2.39532	0.339027	9.02806e-06	0.000780551
SH3BP1	2.24101	0.301078	9.98629e-06	0.00086014
GNG2	1.33849	0.0787378	1.03245e-05	0.000885925
TIE1	-1.97614	0.235901	1.07759e-05	0.000921197
TM7SF2	-1.44501	0.105929	1.38515e-05	0.00117971
CXCL10	6.83954	2.47523	1.43202e-05	0.0012111
COL6A3	1.67275	0.16272	1.43263e-05	0.0012111
HLA-K	2.02289	0.250753	1.44467e-05	0.00121677
ADAMTSL3	-5.88482	1.30766	1.46746e-05	0.00123142
RP11-301G19.1	1.84911	0.207285	1.47943e-05	0.00123692
GFPT2	1.20784	0.0496895	1.49631e-05	0.00124647
RP11-14P20.1	-4.29529	0.820653	1.73058e-05	0.00143639
CDKN2B	1.33504	0.0798578	1.73973e-05	0.00143875
TRNP1	-1.58367	0.142459	1.79263e-05	0.00147714
LINC01133	-2.55478	0.396977	1.86237e-05	0.00152909
LRRC7	-1.87415	0.217306	1.89667e-05	0.00154866
FOSB	1.88391	0.219137	1.89978e-05	0.00154866
RNF150	-2.02183	0.256256	1.98991e-05	0.00161636
CX3CL1	4.2674	0.815546	2.00496e-05	0.00162281
SLAMF7	-2.41676	0.364239	2.13445e-05	0.00172151
CTD-2516F10.2	-1.92665	0.232139	2.19796e-05	0.0017665
CADM3	-3.97134	0.755957	2.27154e-05	0.00181922
RP11-554I8.2	-2.35743	0.350811	2.37205e-05	0.00188987
CCL5	5.23533	1.02871	2.37631e-05	0.00188987
CREB5	1.805	0.202493	2.50365e-05	0.00198423
EGR2	3.45518	0.63499	2.53298e-05	0.00200053
HOPX	-2.36695	0.356667	3.06255e-05	0.00241044
HIST1H4E	2.7058	0.448703	3.17827e-05	0.00249292
ATP6V0A4	-2.5528	0.406782	3.21867e-05	0.00251397
HIST1H2BJ	1.85566	0.219312	3.22713e-05	0.00251397
BDKRB1	5.21128	1.05309	3.4245e-05	0.00265865
IYD	-6.78057	2.6129	3.49309e-05	0.00270271
TMEM45A	1.59536	0.151339	3.69922e-05	0.00285252
SERPIND1	2.34968	0.35783	4.05148e-05	0.00311364
FOXA2	2.96223	0.527982	4.17261e-05	0.00319597
PADI3	-2.26316	0.336753	4.28504e-05	0.0032711
COL4A1	1.29951	0.0756916	4.79058e-05	0.00364483
SH3PXD2A	1.32057	0.0811414	4.81335e-05	0.00364999
CTD-2521M24.5	6.62356	2.5132	4.95326e-05	0.0037417
CHRNB1	-1.39783	0.10171	4.97791e-05	0.0037417
TP53I11	-2.05196	0.279476	4.98347e-05	0.0037417
HCP5	1.57015	0.147874	5.20152e-05	0.00389262
PLXDC2	-5.57387	1.32244	5.25909e-05	0.00392284
KLRF1	3.32914	0.640922	5.98781e-05	0.00445185
PSMB9	1.36309	0.0937713	6.27828e-05	0.00465266
PRUNE2	-1.57947	0.153285	6.80801e-05	0.00502889
DNAJC6	-1.79325	0.213348	7.10277e-05	0.00521902
SULT1B1	-2.60094	0.446021	7.11113e-05	0.00521902
SPRY1	1.41458	0.108388	7.13602e-05	0.0052205
P2RY6	1.91012	0.248398	8.19223e-05	0.00597404
CHRNA1	6.41345	2.50249	8.80093e-05	0.00639749
SPARC	1.24585	0.0644748	9.42151e-05	0.00682686
IFNL1	6.28932	2.4761	0.000104047	0.00751545
FBN1	1.24242	0.0644352	0.000115693	0.00833023
FLRT2	-1.42139	0.114051	0.000116838	0.00838623
RASEF	-1.93783	0.264794	0.0001218	0.00871501
TENM2	1.45332	0.123324	0.000123797	0.00883018
PLA2G4A	1.65953	0.184187	0.000138333	0.0098363
LIF	1.37945	0.103974	0.000143997	0.0102072
PTCSC3	-6.17889	2.54022	0.000145576	0.0102872
SYT12	-1.64032	0.179385	0.000148353	0.0104511
RP11-288L9.1	6.18411	2.47079	0.000152596	0.010717
DYSF	-1.27888	0.0759928	0.000155575	0.0108927
GFRA1	-4.70266	1.0343	0.000164226	0.0114632
CDKN1C	-2.01697	0.294514	0.000165831	0.0115399
CCDC148	-2.198	0.353078	0.000180254	0.0125054
RASGRP3	1.57115	0.163491	0.000214358	0.0148265
A4GALT	1.65815	0.190819	0.000231704	0.0159778
MAOA	-1.41199	0.117038	0.000232785	0.016004
KRTAP2-3	-2.18578	0.361047	0.000247986	0.0169979
LANCL3	4.63677	1.06326	0.000258335	0.0176542
ARHGAP42	1.45305	0.131502	0.000292934	0.0199091
MASP1	-3.06053	0.652835	0.000293076	0.0199091
DPP4	1.46212	0.136007	0.000344819	0.0233546
ODF3B	2.11493	0.349112	0.000364953	0.0246451
ST6GALNAC2	-1.46814	0.139385	0.00039806	0.0268015
C3orf80	5.86298	2.49349	0.000418491	0.0280943
UGT8	-2.94808	0.642776	0.000456982	0.0305883
SLC52A3	-1.9454	0.297326	0.000462406	0.0308609
TRANK1	1.44071	0.133299	0.000493016	0.0328078
RP11-290O12.2	-2.49004	0.490888	0.000499656	0.0330901
SHANK2	-1.82162	0.258027	0.000500158	0.0330901
KCNJ15	2.35624	0.441091	0.000508478	0.0335434
RP11-297P16.4	-4.90806	1.38354	0.000528132	0.0347395
TMEM56	-1.74404	0.236238	0.00055764	0.0365751
JAG1	1.26124	0.0784337	0.000570313	0.0372991
PSG6	-4.85598	1.40249	0.00057525	0.0375145
IFNB1	5.54117	2.41254	0.000577201	0.0375345
SELL	2.82298	0.609144	0.000582879	0.037796
ADGRF4	1.32907	0.100199	0.000610341	0.0394647
GABRA3	-3.01796	0.68335	0.000637304	0.0409982
PRR15	-2.32641	0.44323	0.00063765	0.0409982
SLAIN1	-1.6243	0.199196	0.000682499	0.0437585
PAGE1	-1.28621	0.0882591	0.000695319	0.0444556
WNK4	-1.56988	0.181179	0.000716945	0.0457102
PDLIM3	1.57614	0.184185	0.000765137	0.0486469
COL5A1	1.56122	0.179089	0.000773628	0.0490502
COL3A1	4.93104	0.100585	0	0
IL6	5.25776	0.145302	6.34001e-189	1.20592e-185
LUM	5.1561	0.144303	4.66626e-183	8.19287e-180
SPANXB1	-4.26021	0.129496	2.09346e-140	2.38916e-137
C3	3.99889	0.121705	1.10755e-134	1.09912e-131
TIMP3	-3.78457	0.116324	5.82578e-127	5.54056e-124
COL1A1	3.48478	0.115292	7.93187e-104	6.96327e-101
UGT1A7	3.24657	0.115651	1.1808e-84	8.69411e-82
SOD2	2.77457	0.0926066	1.51017e-82	1.07718e-79
SCG2	3.14234	0.113615	6.48142e-80	4.22681e-77
ICAM1	3.35367	0.134924	8.12685e-69	4.88146e-66
SUCNR1	3.23758	0.13688	1.09633e-60	5.3242e-58
S1PR3	2.37304	0.0840183	1.34322e-60	6.38729e-58
C1S	2.68115	0.103117	2.11143e-60	9.8354e-58
APCDD1L	2.91109	0.120784	4.89941e-57	2.19273e-54
EGR1	3.57921	0.167442	2.13794e-54	9.20726e-52
CTNND2	-4.31176	0.226239	7.74782e-49	3.21535e-46
TNFAIP3	2.819	0.13512	4.8974e-42	1.9273e-39
IL33	2.31556	0.0991523	1.4868e-40	5.56332e-38
LINC00707	-3.45491	0.189361	2.45931e-39	9.05383e-37
TNFAIP6	6.50407	0.423005	9.78412e-39	3.5448e-36
UGT1A8	2.84487	0.143603	2.43062e-38	8.66859e-36
SERPINB2	2.74602	0.136418	2.8742e-38	1.00929e-35
ITGA1	2.00052	0.077999	2.93416e-38	1.01473e-35
DCN	4.03506	0.239231	1.59573e-37	5.35626e-35
ZNF469	2.62953	0.131107	4.28937e-36	1.41891e-33
IL1R1	2.09767	0.0889835	1.79064e-35	5.83876e-33
