# Supplementary material for: Meningioma epigenetic grouping reveals biologic drivers and therapeutic vulnerabilities
Source: Research Square preprint supplement (doi:10.21203/rs.3.rs-113172/v1), 2020-12-09
Supplement: Supplementary file 9 [file 374771bf398a67a844730038.xlsx]

## Sheet: Sheet1
Extended Data Table 7. Differentially expressed genes in meningioma single-cell RNA sequencing clusters.
Gene	pvalue	avg_logFC	pct.1	pct.2	padj	cluster
PTGDS	0	2.54365	0.854	0.559	0	0
SLC26A2	0	1.53509	0.988	0.681	0	0
KCNMA1	0	1.52225	0.977	0.552	0	0
LEPR	0	1.33392	0.993	0.656	0	0
CTXN3	0	1.21944	0.867	0.128	0	0
SLC47A1	0	1.21446	0.958	0.31	0	0
CPE	0	1.15288	0.92	0.434	0	0
IRF1	0	1.1457	0.832	0.695	0	0
BTG2	0	1.11917	0.961	0.765	0	0
IGFBP2	0	1.10364	0.982	0.755	0	0
SLC9B2	0	1.06307	0.902	0.218	0	0
LMO4	0	1.05658	0.986	0.755	0	0
CLU	0	1.04698	0.998	0.755	0	0
APOE	0	1.03845	0.996	0.808	0	0
ADIRF	0	1.03176	0.974	0.672	0	0
SPINT2	0	1.01416	0.929	0.425	0	0
CEBPD	0	1.01162	0.997	0.844	0	0
SFRP2	0	1.00909	0.993	0.71	0	0
NOV	0	1.00728	0.806	0.445	0	0
ID1	0	1.0022	0.962	0.754	0	0
IGFBP6	0	0.995263	0.949	0.596	0	0
NFKBIZ	0	0.993389	0.791	0.611	0	0
FAM107A	0	0.989016	0.8	0.324	0	0
SLPI	0	0.974416	0.867	0.587	0	0
OGN	0	0.974032	0.995	0.666	0	0
PNRC1	0	0.962545	0.964	0.793	0	0
FXYD1	0	0.948664	0.9	0.281	0	0
IGFBP5	0	0.943239	0.856	0.7	0	0
DHRS3	0	0.937714	0.893	0.371	0	0
MEG3	0	0.93064	0.753	0.372	0	0
EGFL6	0	0.923663	0.868	0.481	0	0
ID3	0	0.921729	0.964	0.771	0	0
DCN	0	0.91763	0.878	0.579	0	0
C16orf89	0	0.91367	0.828	0.126	0	0
ENPP6	0	0.872784	0.969	0.512	0	0
CYP1B1	0	0.868227	0.9	0.463	0	0
KLF4	0	0.867244	0.818	0.703	0	0
FRZB	0	0.862913	0.858	0.357	0	0
CTSL	0	0.862174	0.984	0.856	0	0
THSD4	0	0.855387	0.977	0.606	0	0
PHACTR2	0	0.854236	0.943	0.638	0	0
RARRES2	0	0.835679	0.989	0.641	0	0
CTGF	0	0.821612	0.858	0.876	0	0
TMEM205	0	0.815126	0.925	0.57	0	0
RETREG1	0	0.815059	0.855	0.265	0	0
SLC7A2	0	0.8128	0.806	0.17	0	0
KLF2	0	0.810753	0.924	0.833	0	0
SERPINF1	0	0.810276	0.923	0.59	0	0
SCARA5	0	0.801037	0.906	0.426	0	0
NECAB1	0	0.794996	0.804	0.188	0	0
RFLNA	0	0.794848	0.826	0.207	0	0
SLC4A4	0	0.792524	0.908	0.393	0	0
C2orf40	0	0.789099	0.983	0.655	0	0
TMOD1	0	0.782362	0.825	0.191	0	0
JAM2	0	0.764636	0.957	0.523	0	0
JUNB	0	0.760539	0.991	0.885	0	0
SELENOM	0	0.757198	0.985	0.734	0	0
COL11A1	0	0.751449	0.867	0.281	0	0
COPZ2	0	0.741344	0.947	0.546	0	0
ISLR	0	0.741208	0.783	0.194	0	0
GSTM3	0	0.737743	0.867	0.36	0	0
TACC1	0	0.724536	0.895	0.717	0	0
KLF5	0	0.724443	0.806	0.23	0	0
CD9	0	0.717098	0.984	0.767	0	0
CLTB	0	0.709924	0.903	0.678	0	0
ALDH3A2	0	0.695563	0.809	0.215	0	0
GMDS	0	0.694637	0.93	0.487	0	0
CRABP1	0	0.693743	0.804	0.331	0	0
CYB5A	0	0.667694	0.793	0.328	0	0
NBL1	0	0.660873	0.876	0.361	0	0
CEBPB	0	0.65514	0.886	0.787	0	0
SOCS3	0	0.653583	0.891	0.78	0	0
ALCAM	0	0.652516	0.856	0.597	0	0
AKAP12	0	0.64615	0.927	0.765	0	0
GADD45B	0	0.646096	0.978	0.86	0	0
GABARAPL1	0	0.644789	0.847	0.547	0	0
EFEMP1	0	0.644314	0.951	0.615	0	0
JAM3	0	0.643335	0.966	0.602	0	0
NPNT	0	0.639886	0.836	0.536	0	0
KCNQ1OT1	0	0.63455	0.809	0.557	0	0
PHLDB2	0	0.633979	0.753	0.291	0	0
ADI1	0	0.62937	0.967	0.683	0	0
YBX3	0	0.622087	0.999	0.972	0	0
FOXC1	0	0.622054	0.965	0.632	0	0
ITGBL1	0	0.620771	0.781	0.207	0	0
NUPR1	0	0.620207	0.892	0.497	0	0
CCNL1	0	0.618919	0.866	0.824	0	0
NR4A1	0	0.618787	0.871	0.674	0	0
EPHX1	0	0.618617	0.887	0.483	0	0
MRC2	0	0.618477	0.856	0.411	0	0
PPP1R15A	0	0.616387	0.916	0.823	0	0
TMEM59	0	0.61387	0.986	0.853	0	0
CTSF	0	0.608779	0.868	0.42	0	0
SAMD4A	0	0.594588	0.834	0.437	0	0
CTSK	0	0.584036	0.839	0.31	0	0
SIX1	0	0.583635	0.878	0.473	0	0
C1S	0	0.572733	0.852	0.374	0	0
FXYD5	0	0.571919	0.867	0.694	0	0
ADD3	0	0.567608	0.925	0.523	0	0
VIM	0	0.565161	1	0.997	0	0
FGL2	0	0.55786	0.954	0.719	0	0
WBP1L	0	0.557215	0.854	0.444	0	0
MPC2	0	0.557005	0.943	0.651	0	0
RHOB	0	0.553846	0.925	0.916	0	0
NET1	0	0.552126	0.906	0.577	0	0
JUND	0	0.551475	0.998	0.976	0	0
SERPINB1	0	0.536857	0.831	0.562	0	0
CYBRD1	0	0.531918	0.837	0.363	0	0
SH3PXD2A	0	0.527869	0.781	0.39	0	0
ZCCHC24	0	0.527218	0.751	0.261	0	0
USP53	0	0.5268	0.769	0.273	0	0
TPT1	0	0.524447	1	1	0	0
NFIA	0	0.523881	0.877	0.511	0	0
KLF9	0	0.523871	0.894	0.692	0	0
GUCY1A1	0	0.523346	0.833	0.4	0	0
MIDN	0	0.517832	0.784	0.595	0	0
EMP1	0	0.510956	0.874	0.616	0	0
MT1X	0	0.508731	0.751	0.634	0	0
BEX3	0	0.505561	0.984	0.872	0	0
GSN	0	0.505059	0.997	0.878	0	0
SNRPN	0	0.503866	0.823	0.32	0	0
CLEC2B	0	0.50296	0.761	0.395	0	0
ABLIM1	0	0.500392	0.87	0.549	0	0
PTGES3	0	-0.500678	0.804	0.933	0	0
RPS27	0	-0.500963	1	1	0	0
RSL24D1	0	-0.503471	0.596	0.802	0	0
HMGB1	0	-0.508532	0.99	0.993	0	0
RPLP2	0	-0.508625	1	0.999	0	0
ATP5F1E	0	-0.510292	0.997	0.998	0	0
RBM3	0	-0.513296	0.707	0.891	0	0
CCT5	0	-0.522658	0.511	0.759	0	0
RAN	0	-0.524823	0.886	0.934	0	0
CCT2	0	-0.539406	0.52	0.754	0	0
ANP32B	0	-0.547994	0.689	0.83	0	0
COPS9	0	-0.549087	0.61	0.84	0	0
FKBP1A	0	-0.55984	0.567	0.844	0	0
ACTR2	0	-0.566805	0.489	0.794	0	0
SEC61G	0	-0.571428	0.77	0.89	0	0
SNRPB2	0	-0.574664	0.487	0.761	0	0
TMSB10	0	-0.580419	1	1	0	0
IQGAP1	0	-0.589329	0.473	0.788	0	0
DBI	0	-0.595758	0.73	0.9	0	0
ITGB1	0	-0.611958	0.752	0.928	0	0
RPS17	0	-0.613671	0.6	0.791	0	0
ACTR3	0	-0.613846	0.433	0.768	0	0
NCL	0	-0.615566	0.735	0.915	0	0
RPS27L	0	-0.620519	0.898	0.939	0	0
VMP1	0	-0.627354	0.507	0.819	0	0
GAPDH	0	-0.629834	1	0.999	0	0
CFL1	0	-0.634193	0.979	0.992	0	0
TXN	0	-0.634743	0.909	0.933	0	0
DEK	0	-0.635119	0.563	0.82	0	0
TUBA1C	0	-0.646072	0.565	0.757	0	0
ATP5ME	0	-0.648156	0.729	0.921	0	0
PGK1	0	-0.650107	0.778	0.91	0	0
RPL37A	0	-0.651083	1	1	0	0
SNRPB	0	-0.651878	0.583	0.84	0	0
RPL38	0	-0.657055	0.991	0.996	0	0
PKM	0	-0.659212	0.767	0.92	0	0
SNRPG	0	-0.661164	0.572	0.829	0	0
PSMA4	0	-0.667926	0.582	0.829	0	0
PFN1	0	-0.679278	0.864	0.959	0	0
PPP1R14B	0	-0.682487	0.598	0.851	0	0
SET	0	-0.717762	0.808	0.937	0	0
RPL39	0	-0.719151	1	1	0	0
RPS21	0	-0.733603	0.99	0.994	0	0
H2AFZ	0	-0.736199	0.747	0.889	0	0
RPL36A	0	-0.742029	0.733	0.887	0	0
TUBA1A	0	-0.745389	0.729	0.905	0	0
SNRPF	0	-0.762385	0.478	0.772	0	0
RPS26	0	-0.781387	0.915	0.968	0	0
RPL35	0	-0.783026	0.999	0.999	0	0
ACTB	0	-0.795625	1	1	0	0
RPS29	0	-0.796034	0.998	0.999	0	0
HLA-A	0	-0.826892	0.927	0.933	0	0
LGALS1	0	-0.845824	0.946	0.966	0	0
PTMA	0	-0.961112	0.997	1	0	0
TMSB4X	0	-1.07496	1	1	0	0
B2M	0	-1.15631	1	0.998	0	0
S100A6	0	-1.16434	0.942	0.975	0	0
TAGLN2	0	-1.22081	0.33	0.771	0	0
HLA-B	0	-1.44846	0.669	0.828	0	0
TPM1	0	-1.50755	0.903	0.932	0	0
COL1A1	4.86176e-218	-0.696962	0.797	0.898	1.16916e-213	0
CTSD	3.18895e-114	-0.562801	0.689	0.751	7.66879e-110	0
SPARC	1.27334e-98	-0.546199	0.875	0.905	3.06214e-94	0
FTL	1.55468e-54	-0.505278	1	1	3.73869e-50	0
SFRP2.1	0	1.59416	0.998	0.711	0	1
MFAP5	0	1.39506	0.875	0.313	0	1
FGL2.1	0	1.3687	0.991	0.713	0	1
ITM2A	0	1.32092	0.972	0.67	0	1
C2orf40.1	0	1.3195	0.994	0.655	0	1
MGP	0	1.31863	0.998	0.737	0	1
OMD	0	1.21007	0.903	0.341	0	1
NPNT.1	0	1.19992	0.913	0.523	0	1
PCOLCE	0	1.15592	0.956	0.631	0	1
OGN.1	0	1.10437	0.997	0.668	0	1
CDH11	0	1.08779	0.903	0.491	0	1
ALDH2	0	1.08007	0.99	0.709	0	1
EGFL6.1	0	1.07605	0.9	0.477	0	1
THSD4.1	0	1.07481	0.988	0.607	0	1
FBLN1	0	1.07218	0.853	0.54	0	1
IGFBP5.1	0	1.04158	0.969	0.679	0	1
ID4	0	1.03001	0.778	0.243	0	1
CLU.1	0	1.01974	0.998	0.757	0	1
PCSK1N	0	0.980683	0.925	0.54	0	1
SLPI.1	0	0.968183	0.919	0.578	0	1
BOC	0	0.964746	0.832	0.212	0	1
VCAN	0	0.963515	0.908	0.587	0	1
ABLIM1.1	0	0.954252	0.942	0.536	0	1
ADAMTSL3	0	0.931859	0.839	0.191	0	1
COL1A2	0	0.911818	0.997	0.839	0	1
SIX1.1	0	0.902848	0.946	0.463	0	1
ATP1B1	0	0.899755	0.938	0.675	0	1
CTGF.1	0	0.881958	0.948	0.857	0	1
FOXD1	0	0.878439	0.906	0.453	0	1
TIMP3	0	0.873487	0.904	0.598	0	1
TWIST1	0	0.840876	0.847	0.392	0	1
OSGIN2	0	0.834787	0.765	0.23	0	1
SESN3	0	0.826239	0.911	0.466	0	1
FOXC1.1	0	0.811557	0.969	0.633	0	1
MEG3.1	0	0.799343	0.87	0.351	0	1
ENPP6.1	0	0.792868	0.946	0.519	0	1
DCN.1	0	0.788922	0.919	0.572	0	1
APOE.1	0	0.784278	0.997	0.809	0	1
GUCY1A1.1	0	0.772362	0.875	0.395	0	1
LTBP2	0	0.771566	0.823	0.226	0	1
SMAD9	0	0.769707	0.785	0.203	0	1
BGN	0	0.766265	0.901	0.531	0	1
LEPR.1	0	0.748473	0.994	0.658	0	1
COL8A1	0	0.747203	0.761	0.319	0	1
WBP1L.1	0	0.74663	0.893	0.439	0	1
NOV.1	0	0.746619	0.812	0.446	0	1
RARRES2.1	0	0.736877	0.976	0.646	0	1
MSX1	0	0.734353	0.851	0.356	0	1
GADD45B.1	0	0.729441	0.976	0.861	0	1
FZD7	0	0.726575	0.769	0.211	0	1
COPZ2.1	0	0.72231	0.944	0.549	0	1
ADI1.1	0	0.718039	0.974	0.684	0	1
IGFBP6.1	0	0.715955	0.921	0.603	0	1
C1S.1	0	0.711393	0.906	0.366	0	1
GSN.1	0	0.705759	0.998	0.878	0	1
SCARA5.1	0	0.698235	0.922	0.426	0	1
PROS1	0	0.679325	0.834	0.302	0	1
SULF1	0	0.67778	0.788	0.228	0	1
CLDN11	0	0.674418	0.793	0.386	0	1
CTSK.1	0	0.673424	0.872	0.306	0	1
CAVIN3	0	0.670238	0.853	0.55	0	1
C19orf33	0	0.649541	0.8	0.323	0	1
CYP1B1.1	0	0.64646	0.885	0.469	0	1
EFEMP2	0	0.639637	0.915	0.529	0	1
ADIRF.1	0	0.628786	0.941	0.681	0	1
JAM2.1	0	0.627547	0.935	0.531	0	1
KLF2.1	0	0.626854	0.958	0.827	0	1
SERPINF1.1	0	0.621647	0.911	0.595	0	1
CLEC11A	0	0.616476	0.766	0.234	0	1
LGALS3BP	0	0.608396	0.965	0.744	0	1
TAGLN	0	0.598535	0.946	0.686	0	1
ARHGAP21	0	0.59368	0.908	0.582	0	1
GMDS.1	0	0.59318	0.903	0.496	0	1
MT-CO1	0	0.592695	1	1	0	1
APLP2	0	0.589771	0.996	0.925	0	1
NDN	0	0.589405	0.807	0.254	0	1
CCND1	0	0.589189	0.931	0.792	0	1
PPIC	0	0.583028	0.917	0.629	0	1
GPC6	0	0.569834	0.759	0.234	0	1
DKK3	0	0.568038	0.882	0.532	0	1
COL3A1	0	0.56798	0.87	0.494	0	1
CCPG1	0	0.56629	0.897	0.601	0	1
NET1.1	0	0.559174	0.9	0.58	0	1
CYBRD1.1	0	0.558896	0.827	0.368	0	1
HES1	0	0.553963	0.849	0.684	0	1
FOXC2	0	0.538106	0.841	0.523	0	1
ID1.1	0	0.53564	0.948	0.758	0	1
PRDX5	0	0.531145	0.986	0.85	0	1
KLHDC2	0	0.530205	0.753	0.275	0	1
NPDC1	0	0.52655	0.843	0.342	0	1
PHACTR2.1	0	0.525287	0.925	0.644	0	1
JAM3.1	0	0.520315	0.939	0.61	0	1
EFEMP1.1	0	0.520094	0.896	0.628	0	1
SERPING1	0	0.517413	0.86	0.417	0	1
LMO4.1	0	0.516971	0.944	0.765	0	1
SULF2	0	0.515309	0.863	0.511	0	1
VEGFB	0	0.512787	0.792	0.453	0	1
CTSF.1	0	0.509728	0.829	0.431	0	1
TMEM160	0	0.508071	0.88	0.762	0	1
MRPL33	0	-0.507256	0.547	0.779	0	1
GNG5	0	-0.511563	0.549	0.865	0	1
ACTR3.1	0	-0.51992	0.505	0.752	0	1
HMGN2	0	-0.524737	0.7	0.877	0	1
ANP32B.1	0	-0.526172	0.683	0.831	0	1
DEK.1	0	-0.529847	0.62	0.807	0	1
RPLP2.1	0	-0.538703	1	0.999	0	1
ATP5F1E.1	0	-0.538732	0.996	0.998	0	1
SEC61G.1	0	-0.541024	0.758	0.892	0	1
SH3BGRL3	0	-0.549052	0.709	0.888	0	1
IQGAP1.1	0	-0.550227	0.496	0.782	0	1
PABPC1	0	-0.551003	0.858	0.963	0	1
SNRPG.1	0	-0.552362	0.641	0.814	0	1
RPL37A.1	0	-0.566555	1	1	0	1
PGK1.1	0	-0.572945	0.801	0.904	0	1
CFL1.1	0	-0.573899	0.975	0.992	0	1
TUBA1B	0	-0.57814	0.966	0.98	0	1
PFN1.1	0	-0.588757	0.89	0.953	0	1
TMSB10.1	0	-0.599234	1	1	0	1
TUBA1C.1	0	-0.634679	0.583	0.752	0	1
ATP5ME.1	0	-0.635477	0.761	0.914	0	1
GAPDH.1	0	-0.645318	1	0.999	0	1
RPS27L.1	0	-0.646924	0.867	0.944	0	1
H2AFZ.1	0	-0.662592	0.747	0.888	0	1
TUBA1A.1	0	-0.676729	0.802	0.89	0	1
PTMA.1	0	-0.681417	0.999	0.999	0	1
COX7A2	0	-0.683541	0.722	0.943	0	1
RPL38.1	0	-0.685462	0.989	0.997	0	1
ACTB.1	0	-0.68837	1	1	0	1
SNRPF.1	0	-0.688406	0.524	0.761	0	1
RPL39.1	0	-0.700779	1	1	0	1
RPS29.1	0	-0.70124	0.999	0.998	0	1
RPL35.1	0	-0.706935	0.999	0.999	0	1
RPS17.1	0	-0.750278	0.536	0.803	0	1
LGALS1.1	0	-0.785003	0.962	0.963	0	1
TXN.1	0	-0.804068	0.874	0.94	0	1
TMSB4X.1	0	-0.816319	1	1	0	1
RPS21.1	0	-0.889303	0.983	0.995	0	1
MT2A	0	-0.947673	0.667	0.86	0	1
RPL36A.1	0	-0.961821	0.656	0.901	0	1
RPS26.1	0	-0.966027	0.903	0.97	0	1
S100A6.1	0	-1.05758	0.978	0.968	0	1
TAGLN2.1	0	-1.22845	0.323	0.769	0	1
HLA-B.1	0	-1.25107	0.756	0.809	0	1
TPM1.1	0	-1.55283	0.89	0.935	0	1
B2M.1	8.63456e-181	-0.886555	1	0.998	2.07644e-176	1
FTL.1	1.76267e-85	-0.710749	1	1	4.23888e-81	1
COL5A1	0	1.96711	0.985	0.381	0	2
INHBA	0	1.70988	0.865	0.136	0	2
SERPINE1	0	1.57922	0.782	0.162	0	2
TPM1.2	0	1.5447	0.997	0.919	0	2
ADAMTS6	0	1.48058	0.799	0.085	0	2
PRSS23	0	1.39414	0.894	0.35	0	2
MME	0	1.37361	0.834	0.104	0	2
DCBLD2	0	1.36436	0.932	0.329	0	2
PLK2	0	1.30202	0.769	0.19	0	2
ARL4C	0	1.29239	0.926	0.318	0	2
CADM1	0	1.26266	0.881	0.217	0	2
UGCG	0	1.24969	0.798	0.27	0	2
COL5A2	0	1.23686	0.95	0.5	0	2
S100A6.2	0	1.20243	0.999	0.966	0	2
COL4A2	0	1.20156	0.949	0.344	0	2
CTHRC1	0	1.19737	0.86	0.192	0	2
COL4A1	0	1.17716	0.923	0.313	0	2
NUAK1	0	1.15353	0.807	0.211	0	2
COL1A1.1	0	1.14336	0.994	0.868	0	2
TUBB2B	0	1.12258	0.921	0.278	0	2
COL18A1	0	1.10562	0.922	0.315	0	2
LOXL2	0	1.0997	0.828	0.122	0	2
NNMT	0	1.08956	0.947	0.561	0	2
PMEPA1	0	1.08824	0.874	0.55	0	2
SOX4	0	1.08247	0.934	0.594	0	2
PXDN	0	1.0739	0.858	0.255	0	2
BCAT1	0	1.04397	0.887	0.199	0	2
FN1	0	1.04195	0.965	0.909	0	2
EDIL3	0	1.03239	0.859	0.146	0	2
ANXA2	0	1.03227	1	0.988	0	2
RPS27L.2	0	1.01827	0.997	0.924	0	2
CDK6	0	0.995968	0.858	0.228	0	2
TAGLN2.2	0	0.989749	0.985	0.662	0	2
FHL2	0	0.98439	0.816	0.225	0	2
SMS	0	0.94549	0.94	0.388	0	2
C12orf75	0	0.915932	0.883	0.347	0	2
GAPDH.2	0	0.905519	1	0.999	0	2
RPL36A.2	0	0.900842	0.995	0.845	0	2
TXN.2	0	0.898148	0.997	0.921	0	2
TNFRSF12A	0	0.889589	0.82	0.234	0	2
CYTOR	0	0.888186	0.867	0.307	0	2
RPS17.2	0	0.883834	0.988	0.732	0	2
RPL39.2	0	0.877989	1	1	0	2
PGK1.2	0	0.871996	0.981	0.876	0	2
AC245595.1	0	0.862319	0.787	0.152	0	2
FLNA	0	0.853707	0.971	0.674	0	2
ENAH	0	0.84839	0.954	0.758	0	2
MYH9	0	0.842207	0.96	0.634	0	2
VMP1.1	0	0.842176	0.968	0.742	0	2
RPS21.2	0	0.835209	1	0.992	0	2
SET.1	0	0.832271	0.993	0.906	0	2
TUBA1A.2	0	0.83151	0.962	0.865	0	2
RPL37A.2	0	0.827937	1	1	0	2
MARCKS	0	0.813373	0.99	0.924	0	2
RPS26.2	0	0.807675	0.999	0.955	0	2
PKM.1	0	0.804292	0.994	0.882	0	2
PTBP3	0	0.803608	0.822	0.253	0	2
PPP1R14B.1	0	0.801404	0.982	0.788	0	2
CKAP4	0	0.798078	0.853	0.408	0	2
HDAC2	0	0.797344	0.882	0.323	0	2
RPL35.2	0	0.795132	1	0.999	0	2
TUBB2A	0	0.778508	0.868	0.526	0	2
PTPN14	0	0.778099	0.776	0.18	0	2
LDHA	0	0.766945	0.981	0.947	0	2
BASP1	0	0.76242	0.912	0.518	0	2
IL32	0	0.745963	0.826	0.3	0	2
TGFB1	0	0.744151	0.815	0.251	0	2
SEC61G.2	0	0.732026	0.989	0.856	0	2
MIR4435-2HG	0	0.729234	0.773	0.226	0	2
PHPT1	0	0.727972	0.989	0.889	0	2
TMSB10.2	0	0.72119	1	1	0	2
ERBIN	0	0.719067	0.811	0.465	0	2
SINHCAF	0	0.717505	0.751	0.147	0	2
ZFAS1	0	0.715213	0.991	0.926	0	2
SEC61B	0	0.707426	0.996	0.947	0	2
SNRPF.2	0	0.704429	0.971	0.693	0	2
CCT2.1	0	0.703958	0.96	0.686	0	2
RPL4	0	0.702214	1	0.995	0	2
PSMA4.1	0	0.698196	0.967	0.766	0	2
PLP2	0	0.692763	0.81	0.359	0	2
RPL37	0	0.685589	1	1	0	2
TPI1	0	0.682872	0.997	0.957	0	2
NT5DC2	0	0.681183	0.789	0.255	0	2
SNRPB2.1	0	0.680473	0.958	0.686	0	2
SMARCC1	0	0.67998	0.798	0.25	0	2
RSL24D1.1	0	0.676244	0.968	0.744	0	2
SREK1IP1	0	0.674766	0.768	0.323	0	2
PAWR	0	0.667624	0.84	0.553	0	2
CTNNAL1	0	0.660922	0.819	0.443	0	2
LGALS1.2	0	0.657018	0.989	0.96	0	2
TGFBI	0	0.650711	0.843	0.388	0	2
PPIB	0	0.639278	0.992	0.969	0	2
ENO1	0	0.639024	0.986	0.94	0	2
JPT1	0	0.634071	0.913	0.594	0	2
SNRPE	0	0.634036	0.961	0.675	0	2
LIMS1	0	0.631601	0.91	0.611	0	2
IQGAP1.2	0	0.617324	0.958	0.709	0	2
CPNE1	0	0.617167	0.873	0.452	0	2
MRPL14	0	0.615495	0.873	0.473	0	2
HSP90B1	0	0.615414	0.989	0.969	0	2
MRPL33.1	0	0.610343	0.948	0.717	0	2
FKBP4	0	0.609101	0.757	0.266	0	2
S100A10	0	0.593463	1	0.983	0	2
GAS6	0	0.590917	0.811	0.557	0	2
ATP5ME.2	0	0.590094	0.995	0.876	0	2
C19orf53	0	0.586278	0.989	0.886	0	2
PLEC	0	0.583892	0.761	0.402	0	2
TMEM123	0	0.582268	0.857	0.508	0	2
COX7A2.1	0	0.582115	0.989	0.896	0	2
COPS9.1	0	0.581162	0.966	0.782	0	2
TPM4	0	0.579648	0.981	0.903	0	2
SNRPG.2	0	0.569524	0.97	0.764	0	2
RBM3.1	0	0.566989	0.976	0.846	0	2
ROMO1	0	0.566408	0.942	0.709	0	2
RPS19	0	0.565874	1	1	0	2
RPL38.2	0	0.565056	1	0.995	0	2
NAP1L1	0	0.564211	0.997	0.95	0	2
PFDN4	0	0.563909	0.792	0.29	0	2
ACTG1	0	0.560268	1	1	0	2
COL6A1	0	0.55983	0.863	0.697	0	2
EIF4E2	0	0.555782	0.799	0.33	0	2
RPL27	0	0.555421	0.999	0.998	0	2
CALD1	0	0.554798	0.981	0.929	0	2
MED13L	0	0.550598	0.807	0.44	0	2
SNRPD2	0	0.546111	0.961	0.732	0	2
RAD23B	0	0.545831	0.904	0.563	0	2
CNN3	0	0.544608	0.89	0.543	0	2
TUBA1C.2	0	0.543224	0.937	0.7	0	2
NCL.1	0	0.541653	0.977	0.874	0	2
UBQLN1	0	0.540574	0.766	0.28	0	2
RPLP2.2	0	0.539511	1	0.999	0	2
MDK	0	0.534775	0.935	0.886	0	2
ANP32B.2	0	0.533644	0.942	0.791	0	2
DSP	0	0.531203	0.888	0.73	0	2
DDX18	0	0.528432	0.921	0.621	0	2
NONO	0	0.527004	0.914	0.584	0	2
ACTR3.2	0	0.524173	0.938	0.685	0	2
RAN.1	0	0.523396	0.989	0.919	0	2
RPLP0	0	0.522353	1	0.999	0	2
FAM32A	0	0.520717	0.77	0.304	0	2
CCT5.1	0	0.520643	0.928	0.692	0	2
MRPL51	0	0.51595	0.983	0.873	0	2
RPLP1	0	0.514939	1	1	0	2
CCT4	0	0.512905	0.928	0.669	0	2
MORF4L1	0	0.512782	0.997	0.968	0	2
RPSA	0	0.510298	1	0.999	0	2
TMED9	0	0.510158	0.901	0.646	0	2
CDK4	0	0.509631	0.805	0.404	0	2
LDHB	0	0.504805	0.994	0.955	0	2
LAPTM4B	0	0.503514	0.809	0.49	0	2
ATP6V1G1	0	0.502057	0.989	0.95	0	2
NPC2	0	-0.509963	0.643	0.845	0	2
CSTB	0	-0.512684	0.593	0.845	0	2
EIF4B	0	-0.519903	0.41	0.786	0	2
LGALS3BP.1	0	-0.524914	0.525	0.809	0	2
PSAP	0	-0.528461	0.786	0.92	0	2
SDCBP	0	-0.53338	0.76	0.937	0	2
EGR1	0	-0.548905	0.664	0.88	0	2
SBDS	0	-0.57385	0.419	0.798	0	2
DDX5	0	-0.575402	0.958	0.995	0	2
STAT3	0	-0.586169	0.403	0.779	0	2
KLF9.1	0	-0.589562	0.39	0.765	0	2
LEPROT	0	-0.590662	0.333	0.752	0	2
MALAT1	0	-0.594656	0.999	0.999	0	2
LRP1	0	-0.600214	0.403	0.766	0	2
MCL1	0	-0.607663	0.707	0.899	0	2
DUSP1	0	-0.6185	0.87	0.966	0	2
ITM2C	0	-0.630228	0.58	0.78	0	2
SRSF5	0	-0.632266	0.547	0.873	0	2
PRDX5.1	0	-0.63751	0.64	0.899	0	2
ATP1A1	0	-0.650698	0.327	0.78	0	2
SELENOM.1	0	-0.653945	0.476	0.812	0	2
FOSB	0	-0.668623	0.74	0.935	0	2
CALM1	0	-0.685112	0.895	0.984	0	2
CCNL1.1	0	-0.694414	0.613	0.856	0	2
CTSL.1	0	-0.704124	0.691	0.899	0	2
APLP2.1	0	-0.705437	0.778	0.955	0	2
CEBPB.1	0	-0.709765	0.565	0.831	0	2
TPT1.1	0	-0.722167	1	1	0	2
PPP1R15A.1	0	-0.752578	0.606	0.865	0	2
AES	0	-0.764701	0.34	0.822	0	2
HERPUD1	0	-0.76655	0.456	0.826	0	2
CLTB.1	0	-0.770617	0.34	0.759	0	2
IGFBP2.1	0	-0.772139	0.482	0.829	0	2
SARAF	0	-0.786138	0.383	0.854	0	2
FXYD5.1	0	-0.808334	0.277	0.774	0	2
NAMPT	0	-0.819471	0.36	0.795	0	2
CIRBP	0	-0.828447	0.581	0.925	0	2
HES1.1	0	-0.84841	0.316	0.756	0	2
TMEM59.1	0	-0.867448	0.532	0.915	0	2
CD81	0	-0.896523	0.891	0.986	0	2
PFDN5	0	-0.905929	0.824	0.976	0	2
MPC2.1	0	-0.914931	0.181	0.76	0	2
IFITM3	0	-0.918012	0.602	0.925	0	2
BTG1	0	-0.92432	0.563	0.845	0	2
HLA-A.1	0	-0.938576	0.756	0.952	0	2
TIMP1	0	-0.938603	0.671	0.917	0	2
ZFP36L2	0	-0.953911	0.454	0.896	0	2
ADI1.2	0	-0.95628	0.267	0.785	0	2
CD9.1	0	-0.959857	0.375	0.853	0	2
ID3.1	0	-0.971666	0.438	0.846	0	2
JUND.1	0	-0.973094	0.907	0.988	0	2
KLF4.1	0	-0.984695	0.342	0.766	0	2
HLA-B.2	0	-1.00548	0.533	0.831	0	2
FOS	0	-1.03021	0.827	0.974	0	2
TAGLN.1	0	-1.03132	0.371	0.77	0	2
FCGRT	0	-1.0536	0.272	0.869	0	2
TACC1.1	0	-1.08264	0.223	0.807	0	2
LMO4.2	0	-1.08746	0.35	0.845	0	2
IGFBP5.2	0	-1.10595	0.29	0.776	0	2
PNRC1.1	0	-1.12824	0.423	0.868	0	2
B2M.2	0	-1.13653	0.99	0.999	0	2
GLUL	0	-1.14301	0.323	0.863	0	2
TSC22D1	0	-1.17155	0.449	0.845	0	2
NFKBIA	0	-1.18286	0.438	0.88	0	2
CST3	0	-1.18566	0.874	0.972	0	2
ALDH2.1	0	-1.19655	0.246	0.813	0	2
NR4A1.1	0	-1.20465	0.132	0.774	0	2
CYBA	0	-1.21005	0.298	0.859	0	2
TXNIP	0	-1.31312	0.329	0.838	0	2
IRF1.1	0	-1.3344	0.24	0.772	0	2
SOCS3.1	0	-1.38419	0.345	0.851	0	2
ID1.2	0	-1.38425	0.349	0.839	0	2
HLA-C	0	-1.39041	0.356	0.914	0	2
ITM2B	0	-1.40016	0.791	0.974	0	2
SAT1	0	-1.44036	0.566	0.933	0	2
HLA-E	0	-1.45616	0.279	0.887	0	2
KLF2.2	0	-1.46438	0.48	0.891	0	2
GADD45B.2	0	-1.47661	0.573	0.915	0	2
GSN.2	0	-1.57939	0.564	0.936	0	2
ZFP36	0	-1.59322	0.254	0.897	0	2
CEBPD.1	0	-1.72365	0.418	0.921	0	2
BTG2.1	0	-1.74139	0.161	0.871	0	2
ITM2A.1	0	-1.7668	0.156	0.784	0	2
LEPR.2	0	-1.77007	0.108	0.782	0	2
SPARCL1	0	-1.82958	0.11	0.789	0	2
OGN.2	0	-1.85615	0.114	0.791	0	2
JUNB.1	0	-1.89043	0.549	0.944	0	2
SLC26A2.1	0	-1.92524	0.169	0.798	0	2
C2orf40.2	0	-1.94052	0.109	0.779	0	2
FGL2.2	0	-1.95331	0.11	0.833	0	2
ADIRF.2	0	-2.00781	0.108	0.794	0	2
SRGN	0	-2.02336	0.157	0.834	0	2
MGP.1	0	-2.3462	0.139	0.853	0	2
CLU.2	0	-2.54506	0.183	0.867	0	2
APOE.2	0	-2.91195	0.262	0.906	0	2
SFRP2.2	0	-3.21753	0.13	0.83	0	2
JUN	4.86792e-298	-0.61454	0.899	0.949	1.17064e-293	2
CTSD.1	2.08268e-209	-0.590685	0.587	0.758	5.00842e-205	2
HSPA1A	1.1921e-174	-0.65484	0.814	0.939	2.86676e-170	2
IER3	3.30182e-91	-0.573595	0.674	0.765	7.94022e-87	2
CCL3	0	3.41061	0.924	0.149	0	3
IL1B	0	2.88036	0.765	0.063	0	3
HLA-DRA	0	2.80958	0.999	0.344	0	3
C1QB	0	2.76437	0.983	0.106	0	3
CCL4	0	2.75476	0.888	0.237	0	3
CD74	0	2.75111	0.999	0.418	0	3
C1QA	0	2.73535	0.982	0.101	0	3
HLA-DPA1	0	2.50364	0.99	0.173	0	3
HLA-DRB1	0	2.39581	0.994	0.391	0	3
CD14	0	2.33614	0.909	0.124	0	3
C1QC	0	2.27372	0.963	0.056	0	3
HLA-DPB1	0	2.26853	0.983	0.272	0	3
C3	0	2.17125	0.827	0.048	0	3
MS4A7	0	2.10298	0.951	0.057	0	3
HLA-DQB1	0	1.93967	0.942	0.179	0	3
CD163	0	1.92229	0.918	0.05	0	3
TYROBP	0	1.91418	0.97	0.096	0	3
FCER1G	0	1.90361	0.914	0.101	0	3
CD83	0	1.86371	0.893	0.114	0	3
CTSB	0	1.8358	0.986	0.675	0	3
HLA-DQA1	0	1.82411	0.897	0.107	0	3
FCGR2A	0	1.81775	0.892	0.068	0	3
AIF1	0	1.77012	0.922	0.109	0	3
MS4A6A	0	1.76552	0.91	0.059	0	3
LAPTM5	0	1.74596	0.927	0.134	0	3
MRC1	0	1.69516	0.798	0.045	0	3
RNASET2	0	1.66233	0.911	0.228	0	3
SGK1	0	1.63816	0.942	0.421	0	3
SRGN.1	0	1.62337	1	0.742	0	3
C5AR1	0	1.61839	0.831	0.056	0	3
VSIG4	0	1.56303	0.821	0.045	0	3
CSF1R	0	1.55939	0.866	0.039	0	3
RGS1	0	1.49886	0.835	0.132	0	3
SLCO2B1	0	1.48037	0.824	0.045	0	3
ALOX5AP	0	1.47684	0.833	0.093	0	3
HLA-DMA	0	1.46395	0.897	0.174	0	3
CYBB	0	1.45391	0.782	0.041	0	3
NR4A2	0	1.41636	0.904	0.413	0	3
GPR34	0	1.41353	0.793	0.033	0	3
CLEC7A	0	1.40054	0.819	0.045	0	3
C3AR1	0	1.3854	0.833	0.039	0	3
MS4A4A	0	1.38436	0.764	0.042	0	3
KCTD12	0	1.32693	0.861	0.201	0	3
FTL.2	0	1.32151	1	1	0	3
IER3.1	0	1.32044	0.952	0.736	0	3
ITGB2	0	1.29943	0.828	0.104	0	3
A2M	0	1.29605	0.881	0.16	0	3
MAFB	0	1.29578	0.792	0.231	0	3
CTSS	0	1.28223	0.849	0.144	0	3
SAT1.1	0	1.27069	1	0.886	0	3
PLAUR	0	1.25714	0.763	0.203	0	3
CD68	0	1.25037	0.79	0.065	0	3
HLA-DMB	0	1.22107	0.773	0.048	0	3
CYBA.1	0	1.19453	0.998	0.783	0	3
PSAP.1	0	1.14993	0.996	0.897	0	3
CXCL16	0	1.13251	0.778	0.11	0	3
REL	0	1.1194	0.82	0.268	0	3
RGS10	0	1.11192	0.779	0.131	0	3
KLF6	0	1.09492	0.989	0.897	0	3
NPC2.1	0	1.06969	0.991	0.809	0	3
PLXDC2	0	1.06669	0.767	0.187	0	3
SMAP2	0	1.04702	0.773	0.143	0	3
OGFRL1	0	1.03626	0.761	0.232	0	3
HERPUD1.1	0	1.02832	0.919	0.775	0	3
HCLS1	0	1.02643	0.766	0.082	0	3
CELF2	0	1.01843	0.806	0.214	0	3
SLC1A3	0	0.993441	0.755	0.208	0	3
CTSD.2	0	0.961753	0.857	0.729	0	3
DBI.1	0	0.959166	0.965	0.861	0	3
PTPRC	0	0.887372	0.789	0.124	0	3
ATP1B3	0	0.884658	0.936	0.765	0	3
CST3.1	0	0.884057	1	0.958	0	3
MCL1.1	0	0.873451	0.988	0.869	0	3
CTSZ	0	0.8567	0.959	0.796	0	3
GRN	0	0.850905	0.954	0.784	0	3
NAMPT.1	0	0.85065	0.943	0.732	0	3
FCGRT.1	0	0.846907	0.983	0.792	0	3
NFKBIA.1	0	0.84102	0.916	0.827	0	3
ASAH1	0	0.819119	0.796	0.497	0	3
SOD2	0	0.811214	0.793	0.508	0	3
GLUL.1	0	0.806436	0.983	0.791	0	3
FTH1	0	0.756633	1	1	0	3
DUSP1.1	0	0.738925	0.995	0.953	0	3
CEBPB.2	0	0.73845	0.972	0.788	0	3
ZFP36L1	0	0.725694	0.97	0.842	0	3
CMTM6	0	0.711724	0.785	0.454	0	3
DAB2	0	0.662307	0.782	0.596	0	3
FKBP5	0	0.649876	0.89	0.666	0	3
ITM2B.1	0	0.643841	1	0.951	0	3
ZFP36L2.1	0	0.628054	0.971	0.839	0	3
RHOB.1	0	0.582272	0.967	0.913	0	3
ATP6V0B	0	0.581168	0.889	0.706	0	3
TSPO	0	0.563349	0.818	0.627	0	3
B2M.3	0	0.561826	1	0.998	0	3
NR4A1.2	0	0.561445	0.903	0.689	0	3
FOS.1	0	0.546119	0.994	0.956	0	3
NEAT1	0	0.544575	1	0.991	0	3
YWHAH	0	0.543879	0.802	0.632	0	3
HLA-B.3	0	0.542497	0.996	0.781	0	3
AKAP13	0	0.510858	0.888	0.737	0	3
TMSB10.3	0	-0.501605	1	1	0	3
ELOB	0	-0.508787	0.921	0.982	0	3
TCEAL9	0	-0.510666	0.464	0.816	0	3
PEBP1	0	-0.516029	0.914	0.969	0	3
RPL8	0	-0.517489	0.999	1	0	3
MRPL51.1	0	-0.518573	0.733	0.899	0	3
APP	0	-0.51954	0.588	0.856	0	3
LDHA.1	0	-0.526115	0.922	0.954	0	3
RPL6	0	-0.528966	0.998	1	0	3
RPS3	0	-0.537721	1	1	0	3
RPL41	0	-0.53908	1	1	0	3
RPL35A	0	-0.540122	0.998	0.999	0	3
RPL24	0	-0.540784	0.998	1	0	3
HINT1	0	-0.546789	0.94	0.99	0	3
S100A13	0	-0.548578	0.374	0.76	0	3
MAGED2	0	-0.558979	0.565	0.862	0	3
PTMS	0	-0.559749	0.856	0.953	0	3
SDC2	0	-0.571207	0.434	0.8	0	3
RPLP1.1	0	-0.572517	1	1	0	3
RPLP0.1	0	-0.575176	0.996	0.999	0	3
PHPT1.1	0	-0.587641	0.775	0.911	0	3
RCN2	0	-0.595588	0.567	0.868	0	3
IFITM3.1	0	-0.596713	0.876	0.894	0	3
RPSA.1	0	-0.601233	0.997	0.999	0	3
RPS27L.3	0	-0.604725	0.901	0.935	0	3
RPL37A.3	0	-0.604843	1	1	0	3
MARCKSL1	0	-0.60961	0.391	0.772	0	3
ITM2C.1	0	-0.612677	0.592	0.776	0	3
ACTG1.1	0	-0.62321	1	1	0	3
FLNB	0	-0.636887	0.378	0.79	0	3
EID1	0	-0.646056	0.892	0.985	0	3
SELENOM.2	0	-0.649864	0.54	0.801	0	3
PRDX2	0	-0.656805	0.722	0.929	0	3
CAVIN1	0	-0.676897	0.428	0.845	0	3
LMO4.3	0	-0.689848	0.692	0.805	0	3
SPTBN1	0	-0.698653	0.501	0.871	0	3
RPL7A	0	-0.712458	1	1	0	3
DSP.1	0	-0.723479	0.382	0.782	0	3
PPDPF	0	-0.731819	0.708	0.936	0	3
GAPDH.3	0	-0.739203	0.998	1	0	3
NDRG1	0	-0.740387	0.51	0.781	0	3
MAP1B	0	-0.773379	0.529	0.868	0	3
ENAH.1	0	-0.773796	0.448	0.81	0	3
GSTP1	0	-0.785114	0.95	0.993	0	3
TUBA1A.3	0	-0.7904	0.825	0.88	0	3
LDHB.1	0	-0.803958	0.834	0.971	0	3
TXN.3	0	-0.81745	0.823	0.939	0	3
BEX3.1	0	-0.819291	0.603	0.92	0	3
TPM2	0	-0.819629	0.533	0.813	0	3
COL6A2	0	-0.825217	0.52	0.885	0	3
CYR61	0	-0.835149	0.451	0.761	0	3
AKAP12.1	0	-0.839472	0.489	0.822	0	3
DSTN	0	-0.874466	0.777	0.978	0	3
TIMP1.1	0	-0.930737	0.803	0.9	0	3
ID3.2	0	-0.940997	0.648	0.819	0	3
S100A6.3	0	-0.98901	0.922	0.974	0	3
VIM.1	0	-1.01257	0.988	0.999	0	3
MDK.1	0	-1.02898	0.636	0.915	0	3
SPARC.1	0	-1.05983	0.648	0.924	0	3
TSC22D1.1	0	-1.06544	0.576	0.827	0	3
TAGLN.2	0	-1.07498	0.508	0.751	0	3
S100A10.1	0	-1.08398	0.94	0.99	0	3
IGFBP2.2	0	-1.12075	0.568	0.816	0	3
CALD1.1	0	-1.1315	0.666	0.961	0	3
ANXA2.1	0	-1.17695	0.929	0.995	0	3
ID1.3	0	-1.18758	0.608	0.807	0	3
FN1.1	0	-1.22485	0.734	0.933	0	3
CTGF.2	0	-1.27163	0.684	0.891	0	3
COL1A2.1	0	-1.28933	0.657	0.886	0	3
COL1A1.2	0	-1.45579	0.672	0.901	0	3
MGP.2	0	-1.50079	0.649	0.793	0	3
CLU.3	0	-1.50475	0.717	0.805	0	3
TPM1.3	0	-1.51599	0.844	0.935	0	3
SFRP2.3	9.83213e-307	-1.70585	0.65	0.77	2.36443e-302	3
RPS26.3	1.02967e-302	-0.609822	0.948	0.96	2.47614e-298	3
RPL39.3	2.1159e-233	-0.512133	1	1	5.08831e-229	3
RPL35.3	9.63359e-232	-0.526791	1	0.999	2.31669e-227	3
RPS21.3	1.36992e-202	-0.510608	0.995	0.993	3.29439e-198	3
HSPA1A.1	2.57252e-162	0.625354	0.958	0.923	6.18639e-158	3
GSN.3	5.61047e-66	-0.556769	0.976	0.89	1.3492e-61	3
TPM1.4	0	1.15203	0.998	0.921	0	4
RPL35.4	0	1.0369	1	0.999	0	4
RPL37A.4	0	0.971983	1	1	0	4
S100A6.4	0	0.961661	1	0.967	0	4
TXN.4	0	0.940029	0.996	0.923	0	4
GAPDH.4	0	0.931239	1	0.999	0	4
ANXA2.2	0	0.911931	1	0.988	0	4
C12orf75.1	0	0.888943	0.872	0.362	0	4
RPL39.4	0	0.877161	1	1	0	4
TUBB2B.1	0	0.84241	0.882	0.297	0	4
RPL36A.3	0	0.837449	0.993	0.849	0	4
TMSB10.4	0	0.825212	1	1	0	4
RPS26.4	0	0.823988	0.998	0.956	0	4
RPS21.4	0	0.813005	1	0.993	0	4
UBE2S	0	0.805994	0.945	0.621	0	4
RPL38.3	0	0.804925	0.999	0.995	0	4
TAGLN2.3	0	0.794633	0.978	0.671	0	4
SNRPF.3	0	0.772935	0.978	0.7	0	4
RPL37.1	0	0.770801	1	1	0	4
RPS17.3	0	0.770455	0.987	0.739	0	4
RPLP1.2	0	0.77013	1	1	0	4
RPS27L.4	0	0.763745	0.997	0.926	0	4
LGALS1.3	0	0.722769	0.999	0.96	0	4
RPL27.1	0	0.712305	1	0.998	0	4
RPLP2.3	0	0.711724	1	0.999	0	4
SMS.1	0	0.710083	0.88	0.407	0	4
TUBA1C.3	0	0.70064	0.956	0.704	0	4
PPP1R14B.2	0	0.691457	0.991	0.792	0	4
RPL31	0	0.684905	0.999	0.973	0	4
S100A10.2	0	0.681069	1	0.984	0	4
RPL27A	0	0.679331	1	0.999	0	4
SEC61B.1	0	0.67663	0.998	0.948	0	4
RPSA.2	0	0.6727	1	0.999	0	4
RPS19.1	0	0.663762	1	1	0	4
CALM2	0	0.663529	0.997	0.992	0	4
TUBB2A.1	0	0.657595	0.892	0.532	0	4
TPI1.1	0	0.64945	0.998	0.958	0	4
TUBA1B.1	0	0.646467	0.993	0.977	0	4
RAN.2	0	0.64491	0.992	0.92	0	4
PKM.2	0	0.637839	0.995	0.885	0	4
ENO1.1	0	0.633232	0.997	0.941	0	4
RANBP1	0	0.632079	0.95	0.641	0	4
RPL32	0	0.63067	1	1	0	4
LDHB.2	0	0.627154	0.999	0.956	0	4
PSMA4.2	0	0.623203	0.977	0.771	0	4
RPL35A.1	0	0.622226	1	0.999	0	4
ATP5F1E.2	0	0.621555	1	0.998	0	4
RPLP0.2	0	0.620988	1	0.999	0	4
ATP5ME.3	0	0.620282	0.995	0.879	0	4
RPL6.1	0	0.620246	1	0.999	0	4
H2AFZ.2	0	0.619078	0.981	0.855	0	4
SNRPE.1	0	0.618753	0.966	0.682	0	4
SET.2	0	0.615113	0.997	0.908	0	4
GSTP1.1	0	0.614188	1	0.988	0	4
TMSB4X.2	0	0.612946	1	1	0	4
SNRPB.1	0	0.607222	0.976	0.78	0	4
ANP32B.3	0	0.604939	0.975	0.792	0	4
SNRPG.3	0	0.604761	0.977	0.769	0	4
MRPL51.2	0	0.593569	0.993	0.875	0	4
PTMA.2	0	0.590562	1	0.999	0	4
RPS12	0	0.589529	1	1	0	4
PTGES3.1	0	0.582954	0.992	0.904	0	4
EIF5A	0	0.582237	0.966	0.727	0	4
RPL41.1	0	0.579174	1	1	0	4
TMA7	0	0.577382	0.999	0.982	0	4
RPL26	0	0.573159	1	1	0	4
JPT1.1	0	0.568182	0.923	0.601	0	4
RPL4.1	0	0.558079	1	0.995	0	4
ROMO1.1	0	0.558001	0.968	0.713	0	4
LDHA.2	0	0.556617	0.995	0.947	0	4
SNRPD2.1	0	0.545998	0.974	0.737	0	4
NNMT.1	0	0.544696	0.941	0.572	0	4
TUBB	0	0.54119	0.991	0.926	0	4
RPS20	0	0.537748	1	0.993	0	4
NCL.2	0	0.535784	0.988	0.876	0	4
RPS5	0	0.532401	1	0.999	0	4
SEC61G.3	0	0.532396	0.987	0.859	0	4
PHPT1.2	0	0.531695	0.995	0.891	0	4
NME1	0	0.528813	0.922	0.63	0	4
MRPL33.2	0	0.528736	0.963	0.722	0	4
RSL24D1.2	0	0.52667	0.968	0.749	0	4
CCT5.2	0	0.525024	0.951	0.696	0	4
PGK1.3	0	0.52209	0.988	0.878	0	4
RPS29.2	0	0.520712	1	0.998	0	4
ACTG1.2	0	0.519715	1	1	0	4
RPL36	0	0.515507	1	1	0	4
RPL14	0	0.508806	1	0.999	0	4
CTNNAL1.1	0	0.508247	0.804	0.454	0	4
PFN1.2	0	0.507936	0.996	0.938	0	4
MZT2B	0	0.50749	0.994	0.926	0	4
RPS25	0	0.507078	1	0.999	0	4
C19orf53.1	0	0.506335	0.993	0.889	0	4
HMGN2.1	0	0.505932	0.978	0.836	0	4
RPL12	0	0.505397	1	1	0	4
RPL8.1	0	0.501939	1	1	0	4
CFL1.2	0	0.501409	0.998	0.989	0	4
PDCD5	0	0.500753	0.946	0.708	0	4
RPS27A	0	0.500616	1	1	0	4
MT-ATP6	0	-0.529899	1	1	0	4
MT-ND4	0	-0.530499	1	1	0	4
CD81.1	0	-0.534942	0.977	0.976	0	4
MT-CO3	0	-0.556222	1	1	0	4
TPT1.2	0	-0.573995	1	1	0	4
MT-CYB	0	-0.578253	1	1	0	4
FCGRT.2	0	-0.596505	0.874	0.803	0	4
CCNL1.2	0	-0.611324	0.886	0.827	0	4
KLF6.1	0	-0.707291	0.931	0.903	0	4
DUSP1.2	0	-0.726928	0.957	0.956	0	4
CST3.2	0	-0.732112	0.986	0.96	0	4
ZFP36L2.2	0	-0.732145	0.911	0.846	0	4
JUND.2	0	-0.753707	0.975	0.98	0	4
JUN.1	0	-0.782025	0.958	0.943	0	4
ITM2B.2	0	-0.826949	0.976	0.954	0	4
HLA-E.1	0	-0.840605	0.901	0.819	0	4
HLA-C.1	0	-0.861255	0.925	0.852	0	4
FOSB.1	0	-0.866022	0.932	0.914	0	4
MT-CO1.1	0	-0.913618	1	1	0	4
ZFP36.1	0	-0.954705	0.902	0.826	0	4
GADD45B.3	0	-0.967211	0.938	0.876	0	4
GSN.4	0	-0.998679	0.95	0.894	0	4
BTG2.2	0	-1.02454	0.884	0.791	0	4
SAT1.2	0	-1.06052	0.944	0.892	0	4
CEBPD.2	0	-1.08503	0.931	0.865	0	4
FOS.2	0	-1.08635	0.962	0.959	0	4
JUNB.2	0	-1.19435	0.949	0.9	0	4
NEAT1.1	0	-1.31496	0.97	0.993	0	4
APOE.3	0	-1.68388	0.947	0.831	0	4
MALAT1.1	0	-2.07535	0.994	1	0	4
B2M.4	5.30763e-287	-0.886769	0.999	0.998	1.27638e-282	4
SRGN.2	4.40218e-284	-1.26626	0.895	0.754	1.05864e-279	4
NFKBIA.2	8.23108e-284	-0.787527	0.898	0.83	1.97941e-279	4
CYBA.2	9.65386e-271	-0.688137	0.883	0.795	2.32156e-266	4
PNRC1.2	5.12271e-265	-0.701322	0.894	0.816	1.23191e-260	4
KLF2.3	1.36606e-258	-1.01572	0.923	0.843	3.28509e-254	4
RHOB.2	1.82124e-254	-0.573163	0.942	0.916	4.37972e-250	4
MGP.3	1.26132e-246	-1.57541	0.906	0.77	3.03321e-242	4
HERPUD1.2	1.71538e-223	-0.564268	0.854	0.783	4.12515e-219	4
HLA-A.2	2.64921e-221	-0.687766	0.961	0.929	6.37082e-217	4
IFITM3.2	4.45398e-219	-0.54003	0.958	0.886	1.07109e-214	4
PPP1R15A.2	2.56517e-213	-0.541589	0.899	0.834	6.16873e-209	4
TXNIP.1	9.73455e-211	-0.897027	0.885	0.778	2.34096e-206	4
TSC22D3	2.87139e-209	-0.548369	0.899	0.82	6.90512e-205	4
CD9.2	1.81149e-208	-0.623025	0.899	0.796	4.35628e-204	4
CLU.4	3.25161e-206	-1.45719	0.924	0.786	7.81946e-202	4
EGR1.1	1.25725e-205	-0.554971	0.91	0.853	3.02345e-201	4
BTG1.1	4.74462e-203	-0.748506	0.9	0.809	1.14099e-198	4
TIMP1.2	3.43176e-198	-0.734243	0.954	0.886	8.25269e-194	4
SOCS3.2	5.41649e-194	-0.86513	0.899	0.791	1.30256e-189	4
NR4A1.3	1.86995e-193	-0.711996	0.804	0.7	4.49685e-189	4
TACC1.2	3.94025e-192	-0.616915	0.838	0.74	9.47551e-188	4
FGL2.3	7.48919e-166	-1.15677	0.88	0.749	1.801e-161	4
GLUL.2	1.89617e-162	-0.604037	0.899	0.8	4.55991e-158	4
COL1A2.2	9.08679e-159	-0.870412	0.948	0.859	2.18519e-154	4
TSC22D1.2	7.62864e-156	-0.700628	0.896	0.797	1.83453e-151	4
HSPA1A.2	3.39905e-155	-0.791788	0.953	0.924	8.17403e-151	4
SPARCL1.1	3.26012e-148	-1.30622	0.862	0.708	7.83995e-144	4
LMO4.4	3.539e-148	-0.689712	0.89	0.787	8.51059e-144	4
KLF4.2	4.68657e-144	-0.714582	0.828	0.714	1.12703e-139	4
ALDH2.2	8.56722e-138	-0.634296	0.881	0.745	2.06024e-133	4
IRF1.2	5.69751e-137	-0.883276	0.86	0.706	1.37014e-132	4
ID1.4	4.78501e-136	-0.963022	0.907	0.78	1.1507e-131	4
FOXC1.2	8.82541e-136	-0.612651	0.808	0.679	2.12233e-131	4
LEPR.3	2.99057e-124	-1.0879	0.862	0.701	7.19172e-120	4
CEBPB.3	2.09542e-120	-0.567658	0.899	0.796	5.03908e-116	4
ID3.3	2.48018e-120	-0.743189	0.908	0.795	5.96433e-116	4
ITM2A.2	1.11847e-106	-1.13922	0.874	0.707	2.68971e-102	4
OGN.3	7.26325e-103	-1.10546	0.873	0.71	1.74667e-98	4
EMP1.1	1.32512e-96	-0.678575	0.766	0.651	3.18664e-92	4
HES1.2	1.66365e-96	-0.69076	0.84	0.701	4.00075e-92	4
SFRP2.4	1.87778e-95	-2.12087	0.916	0.746	4.51569e-91	4
ADIRF.3	2.2989e-94	-1.13963	0.876	0.711	5.5284e-90	4
THSD4.2	7.80747e-94	-0.894495	0.823	0.657	1.87754e-89	4
IGFBP7	1.30102e-89	-1.47253	0.774	0.465	3.1287e-85	4
SLC26A2.2	2.01205e-83	-1.15223	0.883	0.721	4.83857e-79	4
IGFBP2.3	3.12028e-78	-0.810888	0.923	0.783	7.50365e-74	4
RARRES2.2	5.31938e-78	-0.584086	0.855	0.688	1.2792e-73	4
ATP1B1.1	2.87148e-76	-0.555489	0.852	0.708	6.90533e-72	4
C2orf40.3	4.53393e-74	-1.14737	0.869	0.698	1.09032e-69	4
IGFBP5.3	5.06442e-74	-1.21935	0.883	0.714	1.21789e-69	4
IGFBP6.2	3.83102e-67	-0.839057	0.806	0.644	9.21283e-63	4
NFKBIZ.1	9.02062e-65	-0.566566	0.751	0.633	2.16928e-60	4
CTGF.3	2.78042e-61	-0.853351	0.958	0.865	6.68635e-57	4
TIMP3.1	7.08968e-59	-0.889351	0.799	0.636	1.70493e-54	4
CD74.1	5.0323e-55	-1.39969	0.751	0.446	1.21017e-50	4
HLA-B.4	1.22453e-44	-0.896407	0.933	0.789	2.94475e-40	4
IER3.2	2.99242e-43	-0.673964	0.894	0.744	7.19616e-39	4
DCN.2	1.45964e-38	-0.949885	0.798	0.616	3.51013e-34	4
SLPI.2	2.78663e-37	-1.13675	0.811	0.62	6.70129e-33	4
TAGLN.3	2.11147e-33	-0.833522	0.89	0.715	5.07767e-29	4
KCNMA1.1	2.26305e-25	-1.02119	0.815	0.609	5.44218e-21	4
VCAN.1	3.79271e-21	-0.577708	0.804	0.626	9.12071e-17	4
NPNT.2	4.19095e-16	-0.810473	0.773	0.572	1.00784e-11	4
CTSB.1	2.09651e-07	-0.500247	0.869	0.689	0.00504169	4
CCL5	0	2.84775	0.955	0.037	0	5
NKG7	0	2.75259	0.929	0.022	0	5
GZMB	0	2.26089	0.775	0.01	0	5
GZMK	0	2.19584	0.805	0.013	0	5
GZMA	0	1.99768	0.842	0.013	0	5
CD3D	0	1.89677	0.808	0.024	0	5
CXCR4	0	1.85743	0.954	0.149	0	5
GZMH	0	1.76906	0.76	0.007	0	5
CST7	0	1.72824	0.832	0.02	0	5
CD2	0	1.69156	0.798	0.023	0	5
RGS1.1	0	1.68023	0.845	0.152	0	5
DUSP2	0	1.66917	0.826	0.127	0	5
CCL4.1	0	1.63573	0.906	0.254	0	5
CD7	0	1.62379	0.766	0.027	0	5
HLA-B.5	0	1.53639	0.991	0.788	0	5
B2M.5	0	1.519	1	0.998	0	5
HLA-A.3	0	1.42213	0.996	0.927	0	5
PTPRC.1	0	1.36981	0.845	0.14	0	5
HCST	0	1.32813	0.823	0.127	0	5
IL32.1	0	1.13346	0.822	0.323	0	5
BTG1.2	0	1.08808	0.99	0.805	0	5
HLA-C.2	0	1.06369	0.998	0.848	0	5
RPS29.3	0	0.974635	1	0.998	0	5
RPS27.1	0	0.946471	1	1	0	5
TSC22D3.1	0	0.911483	0.987	0.816	0	5
SH3BGRL3.1	0	0.884989	0.992	0.85	0	5
S100A4	0	0.876641	0.866	0.385	0	5
ZFP36L2.3	0	0.841772	0.994	0.842	0	5
TNFAIP3	0	0.757183	0.857	0.446	0	5
SRSF7	0	0.753093	0.987	0.869	0	5
ID2	0	0.744884	0.793	0.52	0	5
TMSB4X.3	0	0.723027	1	1	0	5
RPS15A	0	0.633242	1	1	0	5
SUB1	0	0.630686	0.997	0.965	0	5
DDIT4	0	0.590536	0.827	0.543	0	5
PSME1	0	0.588939	0.81	0.611	0	5
HLA-E.2	0	0.588527	0.994	0.814	0	5
CYBA.3	0	0.586577	0.982	0.79	0	5
RPL28	0	0.584824	1	1	0	5
DDX24	0	0.559888	0.925	0.719	0	5
SRGN.3	0	0.548406	0.983	0.751	0	5
ATP5F1E.3	0	0.533866	1	0.998	0	5
RPL36AL	0	0.531625	0.999	0.985	0	5
APP.1	0	-0.530257	0.829	0.832	0	5
LAPTM4A	0	-0.555761	0.963	0.973	0	5
RTN4	0	-0.560988	0.955	0.972	0	5
TIMP2	0	-0.577309	0.889	0.921	0	5
FTH1.1	0	-0.58235	1	1	0	5
COL6A2.1	0	-0.586281	0.889	0.85	0	5
S100A11	0	-0.589019	0.997	0.991	0	5
ITM2B.3	0	-0.597588	0.996	0.953	0	5
FCGRT.3	0	-0.61657	0.846	0.806	0	5
DSTN.1	0	-0.629432	0.976	0.959	0	5
PSAP.2	0	-0.632539	0.918	0.905	0	5
CD63	0	-0.633903	0.995	0.998	0	5
BEX3.2	0	-0.676464	0.899	0.891	0	5
MAP1B.1	0	-0.685302	0.867	0.836	0	5
HLA-DRA.1	0	-0.727114	0.768	0.378	0	5
MDK.2	0	-0.72796	0.926	0.888	0	5
APLP2.2	0	-0.751765	0.936	0.937	0	5
S100A10.3	0	-0.775921	0.999	0.984	0	5
ANXA2.3	0	-0.787026	0.991	0.989	0	5
CD9.3	0	-0.79552	0.864	0.801	0	5
MARCKS.1	0	-0.797001	0.929	0.931	0	5
CTSL.2	0	-0.810093	0.888	0.877	0	5
FOSB.2	0	-0.823675	0.961	0.912	0	5
RHOB.3	0	-0.835336	0.928	0.917	0	5
EGR1.2	0	-0.846844	0.896	0.855	0	5
YBX3.1	0	-0.901029	0.972	0.977	0	5
NEAT1.2	0	-0.910042	0.997	0.991	0	5
CALD1.2	0	-0.919332	0.949	0.933	0	5
SPARC.2	0	-0.927777	0.922	0.898	0	5
IFITM3.3	0	-0.942143	0.937	0.889	0	5
FN1.2	0	-0.956441	0.953	0.912	0	5
ID3.4	0	-1.03308	0.895	0.798	0	5
VIM.2	0	-1.04537	1	0.998	0	5
GADD45B.4	0	-1.04789	0.967	0.875	0	5
TIMP1.3	0	-1.10829	0.933	0.889	0	5
CEBPD.3	0	-1.15722	0.948	0.865	0	5
FOS.3	0	-1.18975	0.983	0.958	0	5
CST3.3	0	-1.23557	0.967	0.961	0	5
COL1A2.3	0	-1.25189	0.938	0.861	0	5
GSN.5	0	-1.31843	0.948	0.895	0	5
CTGF.4	0	-1.37784	0.935	0.868	0	5
APOE.4	0	-1.86663	0.961	0.832	0	5
ID1.5	3.58903e-306	-1.2847	0.905	0.782	8.63091e-302	5
CLU.5	5.16615e-292	-1.79584	0.943	0.788	1.24236e-287	5
CCND1.1	6.52976e-280	-0.785667	0.87	0.812	1.57028e-275	5
IGFBP2.4	1.22712e-272	-1.12118	0.898	0.787	2.95097e-268	5
MGP.4	1.05516e-266	-1.62495	0.922	0.771	2.53745e-262	5
LGALS3BP.2	1.49002e-263	-0.533836	0.788	0.78	3.5832e-259	5
FTL.3	2.74338e-260	-0.784532	1	1	6.59728e-256	5
COL1A1.3	3.17988e-252	-1.05279	0.948	0.876	7.64698e-248	5
FGL2.4	1.10694e-246	-1.31409	0.887	0.751	2.66198e-242	5
ATF3	6.96381e-246	-0.700254	0.893	0.808	1.67466e-241	5
AKAP12.2	1.39144e-230	-0.716643	0.845	0.789	3.34615e-226	5
KLF2.4	1.09441e-221	-0.93208	0.954	0.842	2.63185e-217	5
SOCS3.3	3.82445e-219	-0.90404	0.909	0.792	9.19705e-215	5
ALDH2.3	4.55834e-217	-0.806872	0.825	0.751	1.09619e-212	5
TPM2.1	4.97854e-217	-0.661355	0.859	0.783	1.19724e-212	5
GLUL.3	3.09014e-211	-0.690012	0.884	0.803	7.43117e-207	5
JUN.2	2.98799e-200	-0.593521	0.986	0.942	7.18551e-196	5
ADIRF.4	3.87335e-191	-1.41139	0.87	0.715	9.31463e-187	5
HSPA1A.3	7.16462e-187	-0.738396	0.973	0.923	1.72295e-182	5
LMO4.5	1.41959e-185	-0.755416	0.884	0.789	3.41383e-181	5
PPP1R15A.3	6.90862e-182	-0.528953	0.919	0.834	1.66138e-177	5
OGN.4	3.56909e-179	-1.27754	0.87	0.713	8.58295e-175	5
IER3.3	8.21357e-175	-0.999411	0.854	0.749	1.9752e-170	5
SPARCL1.2	2.82266e-171	-1.38333	0.847	0.711	6.78794e-167	5
TSC22D1.3	1.31427e-169	-0.796903	0.898	0.799	3.16057e-165	5
IGFBP5.4	2.2694e-167	-1.4284	0.869	0.718	5.45746e-163	5
KLF4.3	3.0979e-164	-0.792681	0.784	0.719	7.44983e-160	5
SFRP2.5	1.06785e-158	-2.46581	0.938	0.747	2.56796e-154	5
FOXC1.3	1.56701e-149	-0.654198	0.751	0.685	3.76834e-145	5
C2orf40.4	6.65049e-149	-1.38982	0.858	0.701	1.59931e-144	5
LEPR.4	4.57466e-147	-1.17867	0.85	0.705	1.10011e-142	5
SLC26A2.3	6.98154e-147	-1.19881	0.879	0.724	1.67892e-142	5
TAGLN.4	5.22526e-140	-1.14262	0.838	0.722	1.25657e-135	5
HES1.3	9.16649e-133	-0.799103	0.791	0.707	2.20436e-128	5
ADI1.3	9.26684e-133	-0.522613	0.808	0.727	2.22849e-128	5
RARRES2.3	2.98373e-132	-0.73216	0.789	0.695	7.17528e-128	5
CYR61.1	5.2115e-130	-0.684504	0.807	0.729	1.25326e-125	5
BTG2.3	2.09842e-127	-0.798506	0.945	0.789	5.04628e-123	5
ATP1B1.2	1.4024e-125	-0.697291	0.794	0.714	3.3725e-121	5
NR4A1.4	1.60376e-123	-0.643464	0.789	0.703	3.85671e-119	5
PCOLCE.1	2.64592e-108	-0.686807	0.757	0.68	6.3629e-104	5
PHACTR2.2	2.35651e-102	-0.544943	0.754	0.686	5.66693e-98	5
JUNB.3	5.39558e-99	-0.586106	0.991	0.898	1.29753e-94	5
THSD4.3	4.54406e-97	-0.926465	0.784	0.663	1.09275e-92	5
SAT1.3	1.66602e-84	-0.680903	0.975	0.891	4.00645e-80	5
IGFBP6.3	1.29094e-81	-0.877901	0.755	0.65	3.10445e-77	5
TUBA1A.4	4.75892e-47	-0.522997	0.964	0.869	1.14442e-42	5
SLPI.3	1.95542e-38	-0.951628	0.774	0.626	4.7024e-34	5
KCNMA1.2	9.56641e-32	-1.01561	0.771	0.616	2.30053e-27	5
TPM1.5	1.5687e-23	-0.842196	0.967	0.925	3.7724e-19	5
CTSB.2	2.87508e-20	-0.667674	0.774	0.698	6.914e-16	5
ITM2A.3	7.64714e-17	-0.520592	0.931	0.706	1.83898e-12	5
NNMT.2	4.83398e-05	-0.622772	0.77	0.589	1	5
IGFBP7.1	0	2.79927	0.97	0.459	0	6
RGS5	0	2.68275	0.808	0.247	0	6
C11orf96	0	2.27108	0.842	0.126	0	6
TAGLN.5	0	1.88405	0.972	0.714	0	6
NDUFA4L2	0	1.86362	0.865	0.206	0	6
COL3A1.1	0	1.74833	0.835	0.539	0	6
SPARC.3	0	1.40887	0.994	0.894	0	6
PLAC9	0	1.37165	0.817	0.279	0	6
MT2A.1	0	1.36566	0.976	0.818	0	6
NOTCH3	0	1.36496	0.785	0.159	0	6
TIMP1.4	0	1.3638	0.992	0.886	0	6
CALD1.3	0	1.34448	0.998	0.93	0	6
NR2F2	0	1.30037	0.854	0.364	0	6
SPARCL1.3	0	1.28168	0.985	0.703	0	6
ITGB1.1	0	1.19422	0.99	0.892	0	6
IFI27	0	1.18963	0.806	0.306	0	6
MYL9	0	1.18879	0.874	0.593	0	6
LHFPL6	0	1.18321	0.777	0.18	0	6
BGN.1	0	1.18053	0.948	0.57	0	6
MGP.5	0	1.14512	0.994	0.767	0	6
TPM2.2	0	1.10331	0.961	0.777	0	6
FOS.4	0	0.974463	0.995	0.957	0	6
ARID5B	0	0.96706	0.814	0.456	0	6
COL18A1.1	0	0.937554	0.754	0.353	0	6
DSTN.2	0	0.92954	0.996	0.958	0	6
COL4A2.1	0	0.886272	0.758	0.384	0	6
CPE.1	0	0.883664	0.914	0.493	0	6
JUN.3	0	0.859753	0.99	0.941	0	6
MAP1B.2	0	0.850427	0.976	0.829	0	6
UACA	0	0.84215	0.822	0.553	0	6
COL6A1.1	0	0.793649	0.887	0.703	0	6
COL6A2.2	0	0.777963	0.981	0.845	0	6
EGR1.3	0	0.768565	0.963	0.851	0	6
FRZB.1	0	0.736208	0.783	0.422	0	6
LGALS1.4	0	0.694739	0.999	0.961	0	6
LPP	0	0.681967	0.797	0.611	0	6
IGFBP4	0	0.656514	0.809	0.608	0	6
FOSB.3	0	0.651127	0.987	0.91	0	6
ADIRF.5	0	0.650445	0.926	0.712	0	6
IFITM3.4	0	0.645954	0.998	0.885	0	6
HSPB1	0	0.641845	0.94	0.782	0	6
ZBTB20	0	0.607333	0.85	0.633	0	6
MGST3	0	0.571563	0.975	0.895	0	6
HES4	0	0.562728	0.82	0.623	0	6
BTG1.3	0	0.546698	0.965	0.807	0	6
2020-09-07	0	0.52618	0.99	0.951	0	6
ENO1.2	0	-0.549928	0.907	0.947	0	6
RPSA.3	0	-0.564681	0.997	0.999	0	6
FLNB.1	0	-0.580763	0.445	0.772	0	6
MDK.3	0	-0.698235	0.827	0.895	0	6
ANXA2.4	0	-0.81225	0.988	0.989	0	6
S100A10.4	0	-1.05607	0.922	0.989	0	6
FN1.3	4.5545e-292	0.730478	0.982	0.911	1.09527e-287	6
ATF3.1	4.56314e-286	0.567347	0.927	0.807	1.09734e-281	6
TMSB10.5	7.82769e-265	-0.516784	1	1	1.8824e-260	6
DCN.3	4.75542e-238	0.887817	0.833	0.617	1.14358e-233	6
ZFP36L2.4	6.21816e-238	-0.608403	0.801	0.854	1.49534e-233	6
SRGN.4	2.16609e-236	-1.14136	0.779	0.764	5.20901e-232	6
COL1A2.4	9.75831e-221	0.851643	0.985	0.858	2.34668e-216	6
NDRG1.1	2.17908e-220	-0.537283	0.612	0.766	5.24024e-216	6
STMN1	1.38868e-211	-0.556473	0.619	0.77	3.33949e-207	6
FTL.4	4.4677e-203	-0.790106	1	1	1.07439e-198	6
PKM.3	6.64561e-199	-0.519835	0.864	0.896	1.59814e-194	6
FGL2.5	4.43765e-188	-1.05164	0.725	0.762	1.06717e-183	6
PGK1.4	3.39117e-179	-0.507596	0.831	0.89	8.15509e-175	6
GAPDH.5	6.39894e-165	-0.54239	1	0.999	1.53882e-160	6
CYR61.2	3.18111e-164	0.60482	0.865	0.725	7.64994e-160	6
CTSL.3	4.78945e-155	-0.500671	0.845	0.88	1.15177e-150	6
HSPA1A.4	6.27719e-142	0.507148	0.971	0.923	1.50954e-137	6
ALDH2.4	3.02885e-127	-0.52452	0.688	0.76	7.28378e-123	6
TPM1.6	1.34658e-103	-0.515642	0.985	0.924	3.23825e-99	6
IER3.4	4.60414e-89	-0.583316	0.717	0.758	1.1072e-84	6
SFRP2.6	9.24597e-84	-1.31201	0.813	0.755	2.22347e-79	6
SAT1.4	2.84431e-74	-0.520307	0.948	0.893	6.84e-70	6
APOE.5	4.98511e-60	-0.713916	0.907	0.836	1.19882e-55	6
CLU.6	1.76736e-47	-0.744277	0.857	0.793	4.25016e-43	6
OGN.5	2.01479e-37	-0.572811	0.768	0.72	4.84517e-33	6
C2orf40.5	4.20629e-26	-0.74954	0.762	0.708	1.01153e-21	6
VWF	0	2.64868	0.839	0.04	0	7
SPRY1	0	2.34263	0.866	0.159	0	7
SPARCL1.4	0	2.27004	0.996	0.704	0	7
RGCC	0	2.25579	0.815	0.19	0	7
PLVAP	0	2.22539	0.838	0.016	0	7
IFI27.1	0	2.10523	0.977	0.299	0	7
A2M.1	0	2.10097	0.93	0.185	0	7
FLT1	0	2.07807	0.842	0.029	0	7
APOLD1	0	1.92122	0.861	0.162	0	7
IGFBP7.2	0	1.90171	0.992	0.46	0	7
GNG11	0	1.89615	0.918	0.163	0	7
HSPG2	0	1.8813	0.827	0.099	0	7
HYAL2	0	1.87907	0.87	0.266	0	7
PECAM1	0	1.8431	0.872	0.063	0	7
CLEC14A	0	1.84242	0.858	0.006	0	7
EPAS1	0	1.83856	0.92	0.259	0	7
TCF4	0	1.83184	0.905	0.3	0	7
PLPP1	0	1.80667	0.823	0.241	0	7
SLC9A3R2	0	1.79541	0.911	0.398	0	7
ADGRL4	0	1.79404	0.824	0.006	0	7
CAVIN2	0	1.70782	0.765	0.138	0	7
EGFL7	0	1.68477	0.803	0.058	0	7
PODXL	0	1.64367	0.788	0.115	0	7
EMCN	0	1.49105	0.756	0.011	0	7
HLA-E.3	0	1.44588	0.999	0.815	0	7
CALCRL	0	1.44478	0.751	0.037	0	7
CD93	0	1.4105	0.766	0.083	0	7
GIMAP7	0	1.32998	0.763	0.054	0	7
TIMP3.2	0	1.30562	0.979	0.63	0	7
SEC14L1	0	1.30025	0.82	0.315	0	7
TGFBR2	0	1.27727	0.817	0.244	0	7
ENG	0	1.26388	0.771	0.265	0	7
RAMP2	0	1.24074	0.882	0.392	0	7
MT2A.2	0	1.22902	0.976	0.819	0	7
IL6ST	0	1.2284	0.984	0.808	0	7
SPARC.4	0	1.22071	0.988	0.895	0	7
NFIB	0	1.18729	0.795	0.297	0	7
EMP1.2	0	1.16231	0.962	0.643	0	7
HLA-C.3	0	1.14619	0.998	0.85	0	7
HLA-B.6	0	1.14477	0.998	0.789	0	7
CD59	0	1.1279	0.985	0.816	0	7
HES1.4	0	1.10854	0.93	0.699	0	7
CDKN1A	0	1.09572	0.784	0.39	0	7
BST2	0	1.00707	0.769	0.233	0	7
SOCS3.4	0	1.00524	0.988	0.789	0	7
ARHGAP29	0	0.995731	0.758	0.277	0	7
CAV1	0	0.962135	0.792	0.335	0	7
TSC22D1.4	0	0.956025	0.987	0.794	0	7
TACC1.3	0	0.943825	0.971	0.735	0	7
COL4A1.1	0	0.916809	0.809	0.35	0	7
FOS.5	0	0.908736	0.996	0.957	0	7
JMJD1C	0	0.906988	0.804	0.461	0	7
APP.2	0	0.880097	0.987	0.823	0	7
STOM	0	0.873721	0.768	0.389	0	7
HLA-A.4	0	0.870519	0.999	0.928	0	7
IGFBP4.1	0	0.869234	0.914	0.603	0	7
B2M.6	0	0.862497	1	0.998	0	7
NPDC1.1	0	0.860244	0.815	0.403	0	7
CCDC85B	0	0.849839	0.889	0.575	0	7
WWTR1	0	0.842691	0.836	0.491	0	7
SLC2A3	0	0.829246	0.856	0.53	0	7
FKBP1A.1	0	0.782568	0.961	0.787	0	7
SPTBN1.1	0	0.762182	0.986	0.83	0	7
SERTAD1	0	0.746833	0.83	0.498	0	7
MIDN.1	0	0.737948	0.882	0.613	0	7
VAMP5	0	0.729333	0.785	0.455	0	7
ZFP36.2	0	0.700362	0.988	0.823	0	7
ITGB1.2	0	0.688429	0.994	0.893	0	7
FOSB.4	0	0.675093	0.992	0.911	0	7
JUNB.4	0	0.673642	0.997	0.898	0	7
RDX	0	0.665424	0.95	0.784	0	7
CALM1.1	0	0.664928	0.998	0.973	0	7
ITM2B.4	0	0.658607	1	0.953	0	7
GSN.6	0	0.635164	0.994	0.893	0	7
NASP	0	0.631144	0.813	0.511	0	7
IFITM3.5	0	0.628296	0.999	0.886	0	7
COL4A2.2	0	0.619439	0.776	0.385	0	7
DDX3X	0	0.605148	0.958	0.826	0	7
ITM2A.4	0	0.603296	0.97	0.706	0	7
MACF1	0	0.600779	0.795	0.519	0	7
SNHG7	0	0.595716	0.771	0.519	0	7
RNASE1	0	0.588235	0.77	0.136	0	7
DNAJA1	0	0.579833	0.989	0.94	0	7
ID2.1	0	0.57086	0.799	0.522	0	7
WASF2	0	0.566841	0.899	0.7	0	7
NEAT1.3	0	0.566149	1	0.991	0	7
EGR1.4	0	0.558394	0.959	0.852	0	7
IER2	0	0.553536	0.989	0.923	0	7
ID1.6	0	0.553455	0.981	0.779	0	7
PPFIBP1	0	0.550699	0.815	0.558	0	7
CDC37	0	0.539814	0.755	0.504	0	7
KLF2.5	0	0.537684	0.981	0.841	0	7
RAB13	0	0.534372	0.895	0.702	0	7
MXD4	0	0.533938	0.783	0.528	0	7
MGP.6	0	0.527808	0.973	0.77	0	7
YWHAH.1	0	0.526235	0.868	0.635	0	7
ZBTB20.1	0	0.526189	0.865	0.633	0	7
DDX5.1	0	0.515108	1	0.991	0	7
GNAI2	0	0.501285	0.985	0.876	0	7
ATP5MC3	0	-0.512168	0.83	0.961	0	7
MT-CO1.2	0	-0.517295	1	1	0	7
RPLP0.3	0	-0.52937	0.996	0.999	0	7
MT-CO3.1	0	-0.530323	1	1	0	7
PPDPF.1	0	-0.535462	0.797	0.922	0	7
PEBP1.1	0	-0.547732	0.897	0.968	0	7
DSP.2	0	-0.5704	0.523	0.759	0	7
RPLP1.3	0	-0.584055	1	1	0	7
RPSA.4	0	-0.585785	0.997	0.999	0	7
TPI1.2	0	-0.621812	0.908	0.964	0	7
SDC2.1	0	-0.630862	0.431	0.787	0	7
ENO1.3	0	-0.641248	0.851	0.95	0	7
PHPT1.3	0	-0.660175	0.716	0.909	0	7
LDHB.3	0	-0.683361	0.879	0.964	0	7
GSTP1.2	0	-0.689248	0.969	0.99	0	7
LGALS3BP.3	0	-0.69079	0.469	0.798	0	7
COL6A2.3	0	-0.698073	0.628	0.865	0	7
CALM2.1	0	-0.699941	0.951	0.994	0	7
PKM.4	0	-0.709694	0.765	0.901	0	7
S100A10.5	0	-0.711317	0.978	0.986	0	7
ITM2C.2	0	-0.760289	0.509	0.774	0	7
FTH1.2	0	-0.761806	1	1	0	7
GAPDH.6	0	-0.769238	0.999	1	0	7
S100A11.1	0	-0.818015	0.964	0.993	0	7
CST3.4	0	-0.824014	0.94	0.963	0	7
TPM2.3	0	-0.895736	0.534	0.802	0	7
MDK.4	0	-0.915711	0.698	0.901	0	7
ANXA2.5	0	-0.925389	0.982	0.99	0	7
LGALS1.5	0	-0.961462	0.849	0.969	0	7
S100A6.5	0	-1.12188	0.881	0.974	0	7
FTL.5	0	-1.19614	1	1	0	7
COL1A2.5	0	-1.342	0.671	0.877	0	7
COL1A1.4	0	-1.56195	0.649	0.893	0	7
APOE.6	0	-1.73098	0.828	0.841	0	7
EMP3	5.3281e-304	-0.539031	0.508	0.756	1.2813e-299	7
TXNIP.2	1.49111e-302	0.732931	0.906	0.779	3.58581e-298	7
TUBB.1	6.13246e-291	-0.581011	0.854	0.935	1.47473e-286	7
TPM1.7	5.57168e-289	-1.57622	0.87	0.931	1.33988e-284	7
RPL35.5	7.9991e-282	-0.641881	0.999	0.999	1.92362e-277	7
PPP1R14B.3	5.34138e-268	-0.61848	0.667	0.816	1.2845e-263	7
ISG15	4.45549e-265	0.555712	0.764	0.532	1.07146e-260	7
RPS27L.5	2.04531e-263	-0.687035	0.869	0.935	4.91856e-259	7
CCND1.2	2.02785e-246	-0.72216	0.675	0.823	4.87658e-242	7
ENAH.2	4.80404e-235	-0.55262	0.618	0.787	1.15528e-230	7
STMN1.1	1.32751e-233	-0.590509	0.594	0.77	3.1924e-229	7
FGL2.6	1.19729e-231	-1.16677	0.665	0.765	2.87924e-227	7
MAP1B.3	1.2596e-230	-0.553902	0.711	0.845	3.02909e-226	7
CTSL.4	2.19229e-170	-0.528921	0.789	0.883	5.27202e-166	7
HSPA1A.5	1.96577e-167	0.937397	0.966	0.924	4.72729e-163	7
FN1.4	3.336e-160	-0.73829	0.857	0.918	8.02241e-156	7
SFRP2.7	5.24223e-160	-2.08581	0.743	0.76	1.26065e-155	7
GLUL.4	2.30458e-159	-0.576676	0.718	0.813	5.54206e-155	7
MT1X.1	1.23258e-151	0.714383	0.788	0.646	2.96412e-147	7
ALDH2.5	4.03287e-141	-0.639772	0.698	0.759	9.69824e-137	7
TXN.5	1.56471e-132	-0.557321	0.898	0.931	3.76282e-128	7
CALD1.4	2.85916e-127	-0.531846	0.953	0.933	6.87571e-123	7
RPS26.5	9.99738e-107	-0.528916	0.967	0.959	2.40417e-102	7
LMO4.6	1.75568e-106	-0.583264	0.748	0.797	4.22205e-102	7
IGFBP2.5	3.93688e-68	-0.746863	0.801	0.793	9.4674e-64	7
CLU.7	2.2899e-57	-1.00955	0.884	0.792	5.50676e-53	7
HSPA1B	2.32229e-55	0.579602	0.779	0.738	5.58465e-51	7
IER3.5	1.16643e-44	-0.533091	0.739	0.757	2.80502e-40	7
ADIRF.6	9.569e-40	-0.766256	0.767	0.722	2.30115e-35	7
CTGF.5	7.02252e-35	-0.622881	0.9	0.871	1.68877e-30	7
SLC26A2.4	7.12542e-15	-0.776154	0.792	0.731	1.71352e-10	7
AKAP12.3	0.00976482	0.575646	0.756	0.795	1	7
CENPF	0	2.20233	0.977	0.093	0	8
UBE2C	0	2.19556	0.95	0.114	0	8
TOP2A	0	2.10187	0.957	0.086	0	8
HIST1H4C	0	1.92593	0.877	0.513	0	8
CXCL14	0	1.83889	0.823	0.171	0	8
CKS2	0	1.76177	0.968	0.308	0	8
KPNA2	0	1.63162	0.936	0.237	0	8
CCNB2	0	1.58977	0.898	0.082	0	8
TPX2	0	1.54007	0.926	0.069	0	8
UBE2S.1	0	1.53096	0.994	0.626	0	8
CCNB1	0	1.52619	0.857	0.09	0	8
PTTG1	0	1.47131	0.901	0.121	0	8
TUBA1C.4	0	1.46318	0.991	0.709	0	8
PCLAF	0	1.4538	0.892	0.124	0	8
KIF23	0	1.43285	0.87	0.057	0	8
SMC4	0	1.42967	0.969	0.251	0	8
MKI67	0	1.38813	0.89	0.044	0	8
TUBB2B.2	0	1.37493	0.937	0.31	0	8
CKS1B	0	1.36909	0.964	0.255	0	8
TPM1.8	0	1.36495	0.995	0.923	0	8
BIRC5	0	1.36133	0.92	0.073	0	8
FHL2.1	0	1.36117	0.884	0.252	0	8
CENPK	0	1.32087	0.881	0.11	0	8
CDK1	0	1.30868	0.752	0.06	0	8
H2AFZ.3	0	1.29006	0.999	0.857	0	8
PRC1	0	1.28004	0.887	0.066	0	8
TAGLN2.4	0	1.2765	0.974	0.679	0	8
C12orf75.2	0	1.23536	0.959	0.371	0	8
COL5A1.1	0	1.22801	0.944	0.415	0	8
ANLN	0	1.21743	0.899	0.079	0	8
JPT1.2	0	1.20957	0.989	0.606	0	8
HMGB3	0	1.2079	0.937	0.216	0	8
ASPM	0	1.20365	0.761	0.033	0	8
SMC2	0	1.19754	0.939	0.202	0	8
PRSS23.1	0	1.19061	0.918	0.377	0	8
NUSAP1	0	1.18841	0.834	0.055	0	8
CDCA3	0	1.17608	0.85	0.045	0	8
DEK.2	0	1.16786	0.994	0.764	0	8
TUBA1B.2	0	1.1416	1	0.977	0	8
MAD2L1	0	1.14004	0.914	0.107	0	8
ARL4C.1	0	1.11579	0.92	0.35	0	8
SMS.2	0	1.11001	0.962	0.415	0	8
TUBB2A.2	0	1.10571	0.951	0.538	0	8
DTYMK	0	1.10004	0.92	0.232	0	8
PLK2.1	0	1.08847	0.829	0.216	0	8
INHBA.1	0	1.08802	0.831	0.175	0	8
RANBP1.1	0	1.08507	0.977	0.647	0	8
ARL6IP1	0	1.0802	0.905	0.609	0	8
CENPW	0	1.07601	0.903	0.123	0	8
UBE2T	0	1.0698	0.858	0.097	0	8
COL4A2.3	0	1.06721	0.937	0.376	0	8
CDK6.1	0	1.05937	0.894	0.258	0	8
ADAMTS6.1	0	1.0539	0.772	0.123	0	8
PXDN.1	0	1.04673	0.893	0.284	0	8
RRM2	0	1.04646	0.803	0.049	0	8
COL18A1.2	0	1.04389	0.926	0.346	0	8
TUBB.2	0	1.04254	0.998	0.927	0	8
ANP32B.4	0	1.03157	0.992	0.796	0	8
FOXM1	0	1.02554	0.861	0.049	0	8
DCBLD2.1	0	1.01767	0.929	0.36	0	8
SERPINE1.1	0	1.01572	0.761	0.195	0	8
CTNNAL1.2	0	1.00946	0.931	0.456	0	8
POLE3	0	1.00727	0.904	0.268	0	8
SNRPF.4	0	1.00711	0.983	0.707	0	8
TXNRD2	0	1.00121	0.824	0.174	0	8
TUBB4B	0	0.99958	0.985	0.863	0	8
STMN1.2	0	0.998565	0.996	0.748	0	8
RACGAP1	0	0.996173	0.814	0.055	0	8
AXL	0	0.990925	0.853	0.264	0	8
AURKB	0	0.990575	0.796	0.038	0	8
CDKN3	0	0.988792	0.755	0.059	0	8
NCAPD2	0	0.988597	0.837	0.088	0	8
RAN.3	0	0.982025	0.999	0.922	0	8
HDAC2.1	0	0.979686	0.928	0.349	0	8
MME.1	0	0.979332	0.793	0.144	0	8
CKAP2	0	0.974513	0.772	0.113	0	8
COL4A1.2	0	0.97241	0.912	0.345	0	8
KIF20B	0	0.967726	0.779	0.104	0	8
COL5A2.1	0	0.961092	0.944	0.524	0	8
HMGN2.2	0	0.956451	0.996	0.839	0	8
TXN.6	0	0.955552	0.994	0.925	0	8
SET.3	0	0.951113	0.997	0.91	0	8
NNMT.3	0	0.949199	0.941	0.581	0	8
TNFRSF12A.1	0	0.945235	0.86	0.262	0	8
MAGOHB	0	0.945118	0.898	0.268	0	8
CADM1.1	0	0.943592	0.86	0.252	0	8
PSMA4.3	0	0.943436	0.991	0.775	0	8
TACC3	0	0.939673	0.801	0.066	0	8
SNRPG.4	0	0.928634	0.993	0.773	0	8
CTHRC1.1	0	0.927671	0.88	0.225	0	8
TMPO	0	0.921328	0.894	0.243	0	8
UGCG.1	0	0.910671	0.824	0.295	0	8
PBK	0	0.907111	0.804	0.036	0	8
SNRPB.2	0	0.903116	0.992	0.785	0	8
CYTOR.1	0	0.901053	0.894	0.334	0	8
LOXL2.1	0	0.896358	0.837	0.158	0	8
GMNN	0	0.892441	0.825	0.122	0	8
SNRPE.2	0	0.889917	0.977	0.689	0	8
CENPV	0	0.884142	0.869	0.257	0	8
CEP55	0	0.882337	0.761	0.037	0	8
ECT2	0	0.879246	0.769	0.067	0	8
HMGB1.1	0	0.874426	1	0.992	0	8
CCT5.3	0	0.873835	0.978	0.701	0	8
CCT2.2	0	0.869185	0.978	0.699	0	8
CKAP4.1	0	0.861656	0.935	0.426	0	8
PA2G4	0	0.860833	0.974	0.702	0	8
CALM2.2	0	0.857946	1	0.992	0	8
CSE1L	0	0.847621	0.866	0.207	0	8
PTBP3.1	0	0.847379	0.871	0.279	0	8
DKC1	0	0.83642	0.861	0.241	0	8
CD24	0	0.834353	0.771	0.126	0	8
NUCKS1	0	0.83392	0.999	0.965	0	8
ANP32E	0	0.830504	0.894	0.292	0	8
NCL.3	0	0.821233	0.987	0.879	0	8
WEE1	0	0.817606	0.761	0.195	0	8
PTGES3.2	0	0.816869	0.997	0.906	0	8
FLNA.1	0	0.816487	0.975	0.689	0	8
ZWINT	0	0.815591	0.754	0.063	0	8
DDX39A	0	0.815038	0.889	0.258	0	8
NSD2	0	0.814411	0.825	0.121	0	8
BASP1.1	0	0.812063	0.946	0.536	0	8
AC245595.1.1	0	0.810544	0.832	0.182	0	8
RPS17.4	0	0.805059	0.969	0.746	0	8
FKBP4.1	0	0.801672	0.875	0.285	0	8
RRM1	0	0.793122	0.791	0.148	0	8
ANXA2.6	0	0.791817	1	0.989	0	8
PKM.5	0	0.78693	0.998	0.888	0	8
SOX11	0	0.781258	0.763	0.117	0	8
NT5DC2.1	0	0.779255	0.879	0.277	0	8
MRPL51.3	0	0.777238	0.997	0.878	0	8
SMARCC1.1	0	0.774727	0.875	0.274	0	8
PSMD1	0	0.772313	0.912	0.461	0	8
PPP1R14B.4	0	0.7723	0.993	0.797	0	8
SREK1IP1.1	0	0.764789	0.829	0.343	0	8
SKA2	0	0.762475	0.886	0.3	0	8
CDK4.1	0	0.761761	0.906	0.418	0	8
CKAP5	0	0.757628	0.778	0.18	0	8
SOX4.1	0	0.756386	0.928	0.611	0	8
CMSS1	0	0.749645	0.818	0.253	0	8
BCAT1.1	0	0.748808	0.87	0.235	0	8
SNRPD1	0	0.748527	0.956	0.61	0	8
H2AFV	0	0.746274	0.99	0.732	0	8
MIR4435-2HG.1	0	0.743768	0.84	0.25	0	8
MYH9.1	0	0.743179	0.96	0.651	0	8
RPA3	0	0.743003	0.869	0.306	0	8
TUBA1A.5	0	0.742659	0.98	0.869	0	8
LGALS1.6	0	0.739047	0.992	0.961	0	8
SINHCAF.1	0	0.734726	0.803	0.175	0	8
PCNA	0	0.734188	0.765	0.27	0	8
TMEM245	0	0.730722	0.858	0.39	0	8
KPNB1	0	0.729013	0.97	0.673	0	8
HMGB2	0	0.727993	0.894	0.424	0	8
H2AFX	0	0.72783	0.822	0.265	0	8
PTMA.3	0	0.726217	1	0.999	0	8
SNRPB2.2	0	0.723674	0.976	0.699	0	8
MSANTD3	0	0.723534	0.809	0.18	0	8
IARS	0	0.72227	0.847	0.281	0	8
PTPN14.1	0	0.721307	0.809	0.208	0	8
RPL39L	0	0.721055	0.797	0.151	0	8
PMEPA1.1	0	0.719221	0.887	0.566	0	8
DHX29	0	0.709635	0.827	0.356	0	8
UBQLN1.1	0	0.709298	0.876	0.298	0	8
CBX1	0	0.707765	0.881	0.345	0	8
NONO.1	0	0.704689	0.968	0.598	0	8
EZR	0	0.703316	0.922	0.546	0	8
CWC27	0	0.702826	0.771	0.259	0	8
SEC61B.2	0	0.702184	0.997	0.949	0	8
XRCC5	0	0.697622	0.979	0.814	0	8
DENR	0	0.697531	0.879	0.32	0	8
ALYREF	0	0.695817	0.818	0.247	0	8
HNRNPAB	0	0.694803	0.961	0.729	0	8
TRIM28	0	0.69103	0.91	0.38	0	8
CBX3	0	0.690617	0.972	0.658	0	8
CCT4.1	0	0.684954	0.962	0.68	0	8
PFDN4.1	0	0.682593	0.859	0.312	0	8
TPI1.3	0	0.682536	0.998	0.959	0	8
GGH	0	0.681058	0.792	0.2	0	8
COL1A1.5	0	0.680518	0.995	0.874	0	8
STIP1	0	0.680328	0.836	0.278	0	8
HACD3	0	0.679863	0.975	0.744	0	8
HSP90B1.1	0	0.679757	0.998	0.969	0	8
ILF2	0	0.676151	0.962	0.61	0	8
ACTN4	0	0.673656	0.961	0.638	0	8
DUT	0	0.671383	0.97	0.842	0	8
TOMM40	0	0.670966	0.844	0.297	0	8
ERBIN.1	0	0.667498	0.856	0.48	0	8
NME1.1	0	0.667313	0.92	0.637	0	8
NDUFAF2	0	0.667115	0.792	0.312	0	8
EDIL3.1	0	0.662747	0.805	0.185	0	8
TPM4.1	0	0.658038	0.998	0.906	0	8
RPS27L.6	0	0.657875	0.997	0.928	0	8
MZT2A	0	0.649734	0.973	0.647	0	8
WBP11	0	0.649625	0.859	0.299	0	8
COPS9.2	0	0.649085	0.973	0.791	0	8
RBM8A	0	0.648061	0.975	0.76	0	8
CBX5	0	0.644468	0.883	0.452	0	8
BANF1	0	0.642945	0.972	0.667	0	8
ARPP19	0	0.642127	0.954	0.58	0	8
ENAH.3	0	0.639621	0.956	0.768	0	8
SREK1	0	0.63885	0.853	0.483	0	8
SNRPA1	0	0.638815	0.837	0.289	0	8
GAPDH.7	0	0.636622	1	0.999	0	8
IL32.2	0	0.635136	0.839	0.326	0	8
MRPL14.1	0	0.634426	0.924	0.491	0	8
MARCKS.2	0	0.63427	0.988	0.928	0	8
LDHB.4	0	0.633389	0.998	0.957	0	8
PPP1CC	0	0.633068	0.946	0.545	0	8
RPL35.6	0	0.632928	1	0.999	0	8
RAD21	0	0.632608	0.916	0.62	0	8
RPS26.6	0	0.629865	0.997	0.957	0	8
MORF4L1.1	0	0.628847	0.999	0.969	0	8
MZT1	0	0.628306	0.759	0.218	0	8
TPRKB	0	0.626713	0.849	0.299	0	8
DPYSL3	0	0.626392	0.776	0.285	0	8
SAE1	0	0.621593	0.763	0.181	0	8
UBE2N	0	0.621231	0.921	0.516	0	8
SLIRP	0	0.620611	0.947	0.707	0	8
COX5A	0	0.620101	0.981	0.778	0	8
MRPL12	0	0.616708	0.802	0.286	0	8
TARS	0	0.614804	0.804	0.265	0	8
VMP1.2	0	0.614522	0.961	0.754	0	8
ENO1.4	0	0.612912	0.992	0.942	0	8
RSL24D1.3	0	0.611615	0.958	0.756	0	8
XPO1	0	0.611295	0.864	0.343	0	8
BUB3	0	0.611152	0.783	0.286	0	8
MRPL33.3	0	0.608682	0.957	0.728	0	8
IQGAP1.3	0	0.607571	0.961	0.721	0	8
CAV1.1	0	0.607256	0.781	0.335	0	8
COMMD4	0	0.606761	0.841	0.347	0	8
RAD23B.1	0	0.604226	0.944	0.579	0	8
DDX18.1	0	0.603392	0.938	0.635	0	8
RPS21.5	0	0.60305	0.999	0.993	0	8
SYNCRIP	0	0.598666	0.929	0.563	0	8
SNRPD2.2	0	0.593645	0.976	0.743	0	8
ENY2	0	0.592299	0.986	0.819	0	8
NOP56	0	0.591583	0.896	0.491	0	8
FAM136A	0	0.591281	0.797	0.245	0	8
CHD4	0	0.590995	0.853	0.397	0	8
YWHAQ	0	0.590844	0.993	0.869	0	8
EIF5B	0	0.589836	0.959	0.714	0	8
BRIX1	0	0.589021	0.769	0.236	0	8
LIMS1.1	0	0.58741	0.941	0.625	0	8
H1FX	0	0.58659	0.927	0.662	0	8
LSM5	0	0.586236	0.927	0.558	0	8
ANP32A	0	0.586186	0.867	0.414	0	8
AP2B1	0	0.58589	0.884	0.439	0	8
PDCD5.1	0	0.583626	0.962	0.713	0	8
IPO7	0	0.583624	0.851	0.354	0	8
TMSB10.6	0	0.583591	1	1	0	8
NAP1L1.1	0	0.582626	0.998	0.952	0	8
CNIH4	0	0.580404	0.89	0.443	0	8
CCT6A	0	0.579267	0.939	0.611	0	8
TCP1	0	0.579122	0.94	0.604	0	8
XRN2	0	0.579059	0.918	0.542	0	8
NDUFS6	0	0.57803	0.96	0.829	0	8
NDUFA9	0	0.577717	0.832	0.325	0	8
PLP2.1	0	0.576806	0.855	0.38	0	8
EIF6	0	0.576696	0.889	0.537	0	8
EIF4E2.1	0	0.575976	0.863	0.35	0	8
PSMA7	0	0.575934	0.997	0.978	0	8
SSRP1	0	0.575335	0.833	0.293	0	8
OCIAD2	0	0.575135	0.792	0.248	0	8
ACTR3.3	0	0.574881	0.955	0.697	0	8
NIFK	0	0.574749	0.837	0.4	0	8
MLF2	0	0.569333	0.953	0.654	0	8
NUDT1	0	0.568581	0.776	0.214	0	8
EIF3B	0	0.56804	0.841	0.356	0	8
RCN2.1	0	0.566304	0.986	0.833	0	8
YWHAE	0	0.566301	0.999	0.955	0	8
CD44	0	0.565554	0.831	0.318	0	8
CPNE1.1	0	0.565226	0.894	0.472	0	8
EIF5A.1	0	0.564649	0.963	0.733	0	8
SRP9	0	0.563791	0.977	0.84	0	8
TDG	0	0.56293	0.757	0.234	0	8
SEC61G.4	0	0.562369	0.989	0.863	0	8
HDGFL3	0	0.561893	0.844	0.323	0	8
ACTN1	0	0.561497	0.909	0.537	0	8
HNRNPD	0	0.560739	0.953	0.664	0	8
TRIO	0	0.560624	0.757	0.297	0	8
PRKDC	0	0.560396	0.927	0.661	0	8
SEC11A	0	0.560292	0.997	0.928	0	8
LDHA.3	0	0.558983	0.997	0.948	0	8
ACTB.2	0	0.558703	1	1	0	8
RBM3.2	0	0.558592	0.983	0.852	0	8
ACTL6A	0	0.558015	0.758	0.195	0	8
LRRC59	0	0.55789	0.812	0.29	0	8
TGFBR1	0	0.556014	0.765	0.273	0	8
IDH2	0	0.555856	0.753	0.228	0	8
PSMC3	0	0.554947	0.897	0.527	0	8
COX7A2.2	0	0.554627	0.985	0.901	0	8
PFN1.3	0	0.554595	0.998	0.94	0	8
PARP1	0	0.55286	0.832	0.366	0	8
MAPRE1	0	0.552706	0.898	0.449	0	8
TMEM123.1	0	0.552177	0.89	0.524	0	8
EEF1E1	0	0.552092	0.761	0.28	0	8
FLNB.2	0	0.551288	0.951	0.742	0	8
GOLT1B	0	0.551053	0.776	0.233	0	8
SMC1A	0	0.551015	0.758	0.255	0	8
DBN1	0	0.549521	0.772	0.258	0	8
PDLIM1	0	0.547021	0.791	0.236	0	8
EIF4EBP1	0	0.547005	0.754	0.242	0	8
PGK1.5	0	0.546693	0.973	0.882	0	8
RPL36A.4	0	0.5462	0.981	0.854	0	8
SNRPD3	0	0.545391	0.932	0.6	0	8
SPIN1	0	0.544946	0.802	0.309	0	8
YWHAZ	0	0.544357	0.989	0.888	0	8
BRD9	0	0.543834	0.782	0.243	0	8
GPX8	0	0.543442	0.801	0.381	0	8
S100A6.6	0	0.543377	0.995	0.968	0	8
SMIM37	0	0.543291	0.809	0.332	0	8
PFDN2	0	0.542375	0.965	0.732	0	8
POLR2F	0	0.541844	0.889	0.479	0	8
RUVBL1	0	0.54167	0.765	0.263	0	8
C19orf53.2	0	0.539834	0.985	0.892	0	8
LSM3	0	0.537291	0.974	0.79	0	8
SNRNP200	0	0.536827	0.82	0.331	0	8
G3BP1	0	0.535126	0.907	0.53	0	8
KHDRBS1	0	0.531492	0.955	0.679	0	8
LSM7	0	0.529859	0.953	0.694	0	8
HNRNPK	0	0.529818	0.998	0.964	0	8
COPS8	0	0.528208	0.847	0.356	0	8
IKBIP	0	0.525238	0.758	0.275	0	8
ROMO1.2	0	0.524473	0.959	0.72	0	8
HNRNPUL1	0	0.523577	0.851	0.372	0	8
RAB8A	0	0.523364	0.857	0.376	0	8
CCT3	0	0.522847	0.958	0.757	0	8
FAM32A.1	0	0.520855	0.822	0.325	0	8
PHB2	0	0.519991	0.958	0.712	0	8
RPL4.2	0	0.518967	1	0.995	0	8
COX6A1	0	0.518501	0.999	0.96	0	8
PPIA	0	0.516814	1	0.989	0	8
VCL	0	0.516476	0.823	0.384	0	8
MRPL42	0	0.515841	0.843	0.369	0	8
PHPT1.4	0	0.515681	0.984	0.894	0	8
ANAPC11	0	0.515648	0.979	0.813	0	8
MRPL47	0	0.514616	0.824	0.374	0	8
METAP2	0	0.512735	0.937	0.612	0	8
PAWR.1	0	0.51125	0.869	0.566	0	8
TMA7.1	0	0.510953	0.999	0.982	0	8
SRSF2	0	0.510952	0.972	0.837	0	8
SSNA1	0	0.509483	0.815	0.344	0	8
RPL39.5	0	0.509397	1	1	0	8
XRCC6	0	0.507679	0.933	0.608	0	8
FBL	0	0.504209	0.839	0.342	0	8
ESF1	0	0.504013	0.828	0.377	0	8
PSIP1	0	0.503337	0.788	0.353	0	8
LLPH	0	0.502705	0.78	0.285	0	8
ODC1	0	0.502379	0.935	0.722	0	8
CHMP2A	0	-0.502634	0.441	0.811	0	8
BNIP3L	0	-0.503442	0.357	0.761	0	8
FIS1	0	-0.505487	0.535	0.836	0	8
UBC	0	-0.506939	0.997	0.999	0	8
N4BP2L2	0	-0.508492	0.467	0.8	0	8
GABARAPL2	0	-0.512268	0.571	0.85	0	8
ATP6V0E1	0	-0.518403	0.863	0.961	0	8
SH3BGRL	0	-0.525579	0.425	0.791	0	8
TMED10	0	-0.550986	0.545	0.849	0	8
DDX5.2	0	-0.557096	0.984	0.992	0	8
SDCBP.1	0	-0.559447	0.732	0.929	0	8
NDRG1.2	0	-0.578822	0.214	0.787	0	8
SNHG8	0	-0.584343	0.427	0.812	0	8
NPC2.2	0	-0.61216	0.51	0.843	0	8
GRN.1	0	-0.612523	0.476	0.817	0	8
ITM2C.3	0	-0.615704	0.464	0.776	0	8
STAT3.1	0	-0.631531	0.332	0.764	0	8
LGALS3BP.4	0	-0.635865	0.417	0.801	0	8
ARL6IP5	0	-0.647442	0.437	0.852	0	8
MCL1.2	0	-0.649744	0.687	0.89	0	8
SBDS.1	0	-0.652859	0.332	0.784	0	8
EIF4B.1	0	-0.664467	0.27	0.775	0	8
CSTB.1	0	-0.67671	0.46	0.839	0	8
ATP1A1.1	0	-0.688835	0.264	0.761	0	8
SRSF5.1	0	-0.71186	0.454	0.861	0	8
MALAT1.2	0	-0.726936	0.999	0.999	0	8
CTSL.5	0	-0.753761	0.64	0.891	0	8
CCNL1.3	0	-0.766902	0.553	0.847	0	8
PSAP.3	0	-0.779694	0.648	0.921	0	8
AES.1	0	-0.782355	0.25	0.802	0	8
KLF9.2	0	-0.788555	0.21	0.756	0	8
CTSD.3	0	-0.794568	0.452	0.757	0	8
PRDX5.2	0	-0.798654	0.449	0.896	0	8
SARAF.1	0	-0.827411	0.304	0.834	0	8
LRP1.1	0	-0.836731	0.178	0.76	0	8
PPP1R15A.4	0	-0.864163	0.506	0.858	0	8
FTH1.3	0	-0.868643	1	1	0	8
ADI1.4	0	-0.883882	0.201	0.762	0	8
CD81.2	0	-0.925058	0.898	0.981	0	8
HERPUD1.3	0	-0.931116	0.321	0.814	0	8
TSC22D3.2	0	-0.936676	0.382	0.851	0	8
DUSP1.3	0	-0.95981	0.761	0.967	0	8
SELENOM.3	0	-0.972599	0.238	0.808	0	8
HLA-B.7	0	-0.985123	0.444	0.821	0	8
FTL.6	0	-0.988654	1	1	0	8
NAMPT.2	0	-0.995259	0.234	0.78	0	8
TACC1.4	0	-1.00168	0.219	0.777	0	8
CIRBP.1	0	-1.00356	0.418	0.916	0	8
HLA-A.5	0	-1.02111	0.696	0.945	0	8
TMEM59.2	0	-1.02912	0.361	0.905	0	8
TPT1.3	0	-1.0317	1	1	0	8
ZFP36L2.5	0	-1.06335	0.408	0.876	0	8
BTG1.4	0	-1.06407	0.491	0.834	0	8
FOS.6	0	-1.08105	0.831	0.966	0	8
IGFBP2.6	0	-1.08502	0.322	0.82	0	8
JUND.3	0	-1.08917	0.877	0.985	0	8
PFDN5.1	0	-1.09225	0.708	0.975	0	8
TSC22D1.5	0	-1.09485	0.277	0.834	0	8
CEBPB.4	0	-1.10321	0.354	0.829	0	8
ID3.5	0	-1.10841	0.322	0.831	0	8
LMO4.7	0	-1.11129	0.346	0.82	0	8
KLF4.4	0	-1.11485	0.195	0.753	0	8
CD9.4	0	-1.11507	0.248	0.836	0	8
FCGRT.4	0	-1.12499	0.164	0.845	0	8
TAGLN.6	0	-1.1561	0.284	0.754	0	8
B2M.7	0	-1.16299	0.996	0.999	0	8
ALDH2.6	0	-1.17076	0.15	0.789	0	8
GLUL.5	0	-1.18036	0.261	0.839	0	8
IFITM3.6	0	-1.18759	0.418	0.919	0	8
CYBA.4	0	-1.21672	0.185	0.837	0	8
NFKBIA.3	0	-1.29831	0.283	0.866	0	8
ID1.7	0	-1.31882	0.27	0.819	0	8
CST3.5	0	-1.32213	0.791	0.971	0	8
TIMP1.5	0	-1.34321	0.39	0.92	0	8
PNRC1.3	0	-1.36612	0.184	0.858	0	8
KLF2.6	0	-1.39627	0.484	0.869	0	8
SOCS3.5	0	-1.39816	0.268	0.829	0	8
HLA-C.4	0	-1.40829	0.301	0.889	0	8
TXNIP.3	0	-1.4868	0.203	0.819	0	8
HLA-E.4	0	-1.5101	0.192	0.861	0	8
ITM2A.5	0	-1.51873	0.113	0.754	0	8
GADD45B.5	0	-1.54244	0.418	0.907	0	8
ITM2B.5	0	-1.55199	0.637	0.974	0	8
SAT1.5	0	-1.61418	0.462	0.92	0	8
ZFP36.3	0	-1.64706	0.147	0.87	0	8
OGN.6	0	-1.65509	0.095	0.758	0	8
BTG2.4	0	-1.67182	0.109	0.837	0	8
IGFBP5.5	0	-1.67387	0.14	0.76	0	8
ADIRF.7	0	-1.69961	0.092	0.76	0	8
CEBPD.4	0	-1.74843	0.225	0.906	0	8
FGL2.7	0	-1.75469	0.094	0.797	0	8
GSN.7	0	-1.77529	0.311	0.931	0	8
SLC26A2.5	0	-1.85447	0.112	0.769	0	8
SPARCL1.5	0	-1.8669	0.087	0.755	0	8
JUNB.5	0	-1.9389	0.444	0.929	0	8
CLU.8	0	-1.95171	0.134	0.834	0	8
SRGN.5	0	-2.00555	0.118	0.801	0	8
MGP.7	0	-2.15162	0.108	0.818	0	8
SFRP2.8	0	-2.429	0.102	0.796	0	8
APOE.7	0	-2.44889	0.176	0.878	0	8
NEAT1.4	1.64246e-297	-0.7475	0.972	0.992	3.94979e-293	8
FOSB.5	6.96009e-283	-0.716277	0.747	0.924	1.67376e-278	8
APLP2.3	5.72208e-280	-0.531665	0.866	0.941	1.37605e-275	8
APP.3	1.42364e-273	-0.511095	0.638	0.843	3.42357e-269	8
RHOB.4	4.29702e-218	-0.60675	0.812	0.924	1.03335e-213	8
JUN.4	3.36954e-203	-0.699556	0.888	0.947	8.10308e-199	8
IER3.6	8.80801e-191	-0.854003	0.567	0.766	2.11815e-186	8
COL1A2.6	4.94573e-183	-0.560157	0.65	0.878	1.18935e-178	8
HSPA1A.6	1.69385e-118	-0.766333	0.817	0.932	4.07337e-114	8
SLC47A1.1	0	0.56621	0.832	0.404	0	9
MALAT1.3	6.0719e-272	1.20318	1	0.999	1.46017e-267	9
SLC4A4.1	7.159e-252	0.527845	0.795	0.468	1.7216e-247	9
ARGLU1	1.14709e-251	0.627525	0.949	0.755	2.75853e-247	9
LUC7L3	1.85031e-232	0.632035	0.926	0.725	4.44963e-228	9
SON	1.22038e-216	0.52317	0.99	0.922	2.93477e-212	9
KCNQ1OT1.1	9.56464e-202	0.567709	0.881	0.588	2.30011e-197	9
TSC22D1.6	2.10884e-197	0.548305	0.974	0.797	5.07134e-193	9
AKAP9	2.12572e-167	0.526073	0.902	0.706	5.11194e-163	9
HSPA1A.7	6.11351e-144	0.51078	0.991	0.923	1.47018e-139	9
NEAT1.5	2.06495e-141	0.825173	0.999	0.991	4.96579e-137	9
B2M.8	5.65024e-129	-0.851228	0.998	0.998	1.35877e-124	9
HLA-A.6	6.49737e-124	-0.697261	0.978	0.93	1.56249e-119	9
HLA-C.5	1.18559e-120	-0.685386	0.949	0.854	2.8511e-116	9
PNISR	5.71302e-81	0.511404	0.95	0.845	1.37387e-76	9
SRGN.6	1.41342e-53	-0.918916	0.947	0.757	3.399e-49	9
SFRP2.9	8.69832e-48	-0.512678	0.965	0.75	2.09177e-43	9
HLA-B.8	3.2376e-46	-1.01008	0.943	0.794	7.78578e-42	9
IER3.7	6.14863e-34	-0.649801	0.902	0.749	1.47862e-29	9
TAGLN2.5	2.55486e-19	-0.512471	0.876	0.687	6.14392e-15	9
CTGF.6	1.02649e-10	-0.63047	0.978	0.868	2.4685e-06	9
SPARCL1.6	4.84988e-10	-0.602116	0.946	0.71	1.1663e-05	9
TAGLN.7	1.61477e-06	-0.54048	0.941	0.72	0.038832	9
DCN.4	5.37988e-05	-0.57178	0.869	0.62	1	9
LYZ	0	2.68566	0.794	0.072	0	10
FCER1G.1	0	1.8277	0.883	0.149	0	10
HLA-DRA.2	0	1.80457	0.973	0.382	0	10
CTSS.1	0	1.79952	0.89	0.183	0	10
TYROBP.1	0	1.75582	0.895	0.149	0	10
S100A4.1	0	1.68278	0.944	0.397	0	10
HLA-DRB1.1	0	1.6609	0.964	0.426	0	10
TYMP	0	1.65189	0.819	0.191	0	10
HLA-DQA1.1	0	1.64972	0.762	0.158	0	10
HLA-DQB1.1	0	1.62992	0.87	0.225	0	10
AIF1.1	0	1.62043	0.866	0.158	0	10
ALOX5AP.1	0	1.61774	0.785	0.137	0	10
HLA-DPB1.1	0	1.58294	0.877	0.317	0	10
LAPTM5.1	0	1.54432	0.912	0.18	0	10
HLA-DPA1.1	0	1.51807	0.894	0.223	0	10
FTL.7	0	1.51336	1	1	0	10
RGS2	0	1.50063	0.785	0.187	0	10
LST1	0	1.49773	0.786	0.086	0	10
PLAUR.1	0	1.46027	0.825	0.233	0	10
CD74.2	0	1.40369	0.973	0.453	0	10
LCP1	0	1.39774	0.818	0.11	0	10
SAMSN1	0	1.36471	0.765	0.103	0	10
CD44.1	0	1.33736	0.83	0.329	0	10
COTL1	0	1.32814	0.855	0.282	0	10
SRGN.7	0	1.32784	0.997	0.757	0	10
LITAF	0	1.3118	0.817	0.316	0	10
CTSB.3	0	1.29619	0.942	0.695	0	10
FCGR2A.1	0	1.2928	0.769	0.12	0	10
ITGB2.1	0	1.24083	0.791	0.147	0	10
C1orf162	0	1.20749	0.757	0.086	0	10
FTH1.4	0	1.2048	1	1	0	10
GLUL.6	0	1.1876	0.956	0.803	0	10
SH3BGRL3.2	0	1.17047	0.99	0.854	0	10
CD53	0	1.15708	0.811	0.122	0	10
PTPRC.2	0	1.12003	0.85	0.16	0	10
CYBA.5	0	1.07512	0.991	0.796	0	10
NAMPT.3	0	1.06235	0.931	0.745	0	10
GRN.2	0	0.975094	0.933	0.794	0	10
HLA-B.9	0	0.9677	0.999	0.794	0	10
RNASET2.1	0	0.926283	0.794	0.271	0	10
SAT1.6	0	0.925415	0.997	0.893	0	10
ASAH1.1	0	0.923169	0.817	0.514	0	10
ATP1B3.1	0	0.884075	0.924	0.775	0	10
NPC2.3	0	0.855986	0.954	0.82	0	10
ARHGDIB	0	0.841801	0.79	0.29	0	10
H2AFY	0	0.82278	0.888	0.618	0	10
B2M.9	0	0.816876	1	0.998	0	10
CMTM6.1	0	0.789988	0.842	0.471	0	10
BTG1.5	0	0.77391	0.975	0.811	0	10
OAZ1	0	0.767542	1	0.989	0	10
S100A11.2	0	0.758471	0.996	0.991	0	10
LRRFIP1	0	0.749223	0.905	0.639	0	10
VAMP8	0	0.736143	0.785	0.479	0	10
METRNL	0	0.732991	0.794	0.455	0	10
ARPC5	0	0.730906	0.968	0.85	0	10
GSTO1	0	0.725038	0.884	0.727	0	10
EMP3.1	0	0.68817	0.929	0.736	0	10
ACTB.3	0	0.685659	1	1	0	10
LIMS1.2	0	0.660078	0.891	0.633	0	10
ATP6V0B.1	0	0.657107	0.919	0.716	0	10
ACTR2.1	0	0.619061	0.924	0.735	0	10
CAP1	0	0.606016	0.891	0.648	0	10
CLIC1	0	0.573188	0.991	0.924	0	10
ARPC3	0	0.550203	0.998	0.968	0	10
HLA-A.7	0	0.549178	0.999	0.929	0	10
TCEAL9.1	0	-0.547018	0.419	0.798	0	10
HACD3.1	0	-0.570322	0.377	0.769	0	10
RCN2.2	0	-0.605393	0.518	0.852	0	10
PTMS.1	0	-0.607333	0.744	0.951	0	10
RPL7A.1	0	-0.632364	1	1	0	10
MAGED2.1	0	-0.694178	0.424	0.849	0	10
LDHB.5	0	-0.717573	0.805	0.964	0	10
CAVIN1.1	0	-0.731139	0.344	0.824	0	10
DSP.3	0	-0.735004	0.336	0.76	0	10
EID1.1	0	-0.740164	0.836	0.982	0	10
PRDX2.1	0	-0.755562	0.607	0.921	0	10
ENAH.4	0	-0.757305	0.382	0.791	0	10
PEBP1.2	0	-0.79653	0.748	0.971	0	10
ITM2C.4	0	-0.810104	0.351	0.774	0	10
SPTBN1.2	0	-0.815466	0.397	0.853	0	10
JUN.5	0	-0.834772	0.785	0.95	0	10
SELENOM.4	0	-0.848603	0.377	0.791	0	10
DSTN.3	0	-0.888265	0.752	0.967	0	10
BEX3.3	0	-0.912702	0.481	0.906	0	10
COL6A2.4	0	-0.921567	0.409	0.868	0	10
AKAP12.4	0	-0.935865	0.356	0.808	0	10
MAP1B.4	0	-0.986483	0.387	0.853	0	10
TPM2.4	0	-0.986666	0.409	0.801	0	10
CCND1.3	0	-1.01112	0.409	0.829	0	10
MDK.5	0	-1.08126	0.517	0.903	0	10
TSC22D1.7	0	-1.085	0.437	0.817	0	10
SPARC.5	0	-1.19623	0.542	0.912	0	10
CALD1.5	0	-1.26226	0.536	0.948	0	10
ID1.8	0	-1.40169	0.46	0.801	0	10
COL1A1.6	0	-1.41538	0.621	0.889	0	10
IGFBP2.7	0	-1.44135	0.436	0.806	0	10
COL1A2.7	0	-1.59926	0.497	0.878	0	10
CTGF.7	0	-1.7519	0.567	0.883	0	10
CLU.9	0	-2.01781	0.481	0.808	0	10
MGP.8	0	-2.07453	0.447	0.792	0	10
SFRP2.10	0	-2.70788	0.454	0.769	0	10
TSPO.1	4.60576e-307	0.664934	0.868	0.637	1.10759e-302	10
TSPAN3	4.27965e-304	-0.553492	0.42	0.788	1.02917e-299	10
SGK1.1	3.24102e-299	0.662995	0.8	0.456	7.79401e-295	10
FOXP1	1.79213e-295	-0.552459	0.521	0.859	4.30971e-291	10
NUCKS1.1	4.54972e-293	-0.548395	0.836	0.971	1.09412e-288	10
PSAP.4	2.49362e-290	0.8842	0.943	0.905	5.99666e-286	10
SOD1	2.6288e-289	-0.506413	0.773	0.948	6.32174e-285	10
IFNGR1	3.47669e-287	0.566969	0.83	0.558	8.36075e-283	10
C12orf57	6.13559e-286	-0.518932	0.515	0.844	1.47549e-281	10
IL6ST.1	5.07613e-279	-0.597567	0.486	0.829	1.22071e-274	10
NR4A2.1	7.33724e-279	0.633128	0.778	0.446	1.76446e-274	10
PFN1.4	2.37344e-277	0.519272	0.993	0.941	5.70764e-273	10
YBX3.2	3.62521e-273	-0.627452	0.886	0.98	8.7179e-269	10
MCL1.3	4.04521e-272	0.57275	0.972	0.876	9.72791e-268	10
PABPC1.1	3.75283e-266	0.500088	0.99	0.944	9.0248e-262	10
BRI3	2.30425e-265	0.688372	0.957	0.924	5.54125e-261	10
APP.4	9.18438e-261	-0.588774	0.553	0.842	2.20866e-256	10
LGALS3BP.5	1.0157e-260	-0.602665	0.468	0.791	2.44255e-256	10
MSN	1.63316e-260	0.513967	0.832	0.577	3.92742e-256	10
FLNB.3	1.13986e-259	-0.533267	0.424	0.764	2.74113e-255	10
ARPC1B	2.05782e-255	0.545097	0.89	0.734	4.94866e-251	10
HLA-C.6	1.2869e-254	0.505297	0.996	0.853	3.09473e-250	10
CTSD.4	8.46562e-252	1.62491	0.856	0.736	2.03581e-247	10
GSN.8	2.86254e-240	-1.01111	0.839	0.9	6.88385e-236	10
KLF2.7	3.32257e-240	-1.03999	0.644	0.856	7.99011e-236	10
PRDX4	1.00974e-237	-0.510093	0.504	0.797	2.42822e-233	10
CD59.1	7.76141e-229	-0.502093	0.539	0.835	1.86646e-224	10
ATP6V1F	1.88435e-221	0.573015	0.901	0.804	4.53149e-217	10
LMO4.8	1.02412e-216	-0.873428	0.591	0.802	2.46281e-212	10
CSTB.2	5.47278e-211	1.32402	0.91	0.816	1.31609e-206	10
ID3.6	6.63928e-199	-0.895777	0.604	0.811	1.59661e-194	10
SLC2A3.1	3.96293e-183	0.900979	0.766	0.54	9.53005e-179	10
CEBPB.5	6.91149e-177	0.599396	0.922	0.8	1.66208e-172	10
GADD45B.6	2.81825e-162	-0.814401	0.777	0.884	6.77734e-158	10
CTSZ.1	2.02951e-156	0.523178	0.893	0.807	4.88056e-152	10
ANXA2.7	1.62105e-155	-0.682482	0.982	0.99	3.89831e-151	10
TPM1.9	6.20447e-154	-1.24212	0.822	0.931	1.49205e-149	10
BASP1.2	3.74945e-148	0.549112	0.757	0.551	9.01668e-144	10
LGALS1.7	6.81262e-146	0.503727	0.99	0.962	1.6383e-141	10
YWHAH.2	1.89008e-135	0.613428	0.799	0.642	4.54527e-131	10
LGALS3	2.97689e-113	0.870535	0.806	0.741	7.15882e-109	10
TACC1.5	3.51123e-87	-0.524978	0.619	0.752	8.4438e-83	10
ALDH2.7	1.97991e-64	-0.525169	0.67	0.758	4.76128e-60	10
TUBA1A.6	1.39821e-55	-0.516652	0.821	0.877	3.3624e-51	10
BTG2.5	1.94793e-49	-0.588087	0.774	0.799	4.68439e-45	10
TIMP1.6	8.75147e-30	0.701877	0.92	0.891	2.10455e-25	10
FGL2.8	4.60599e-18	-0.673627	0.798	0.758	1.10765e-13	10
PLP1	0	4.42368	0.891	0.105	0	11
GPM6B	0	2.94593	0.929	0.129	0	11
TF	0	2.71118	0.797	0.025	0	11
S100B	0	2.62574	0.844	0.047	0	11
CRYAB	0	2.56656	0.955	0.468	0	11
MBP	0	2.41671	0.853	0.267	0	11
CLDND1	0	2.32239	0.817	0.274	0	11
PPP1R14A	0	2.25967	0.8	0.073	0	11
NKX6-2	0	2.24482	0.777	0.013	0	11
MAG	0	2.24447	0.77	0.013	0	11
APLP1	0	2.12518	0.753	0.074	0	11
QDPR	0	2.09413	0.832	0.184	0	11
CNP	0	2.08509	0.777	0.167	0	11
CAMK2N1	0	2.01144	0.858	0.208	0	11
SELENOP	0	1.79642	0.896	0.422	0	11
PCDH9	0	1.72574	0.775	0.054	0	11
KCNMB4	0	1.69308	0.751	0.07	0	11
SLC44A1	0	1.57438	0.825	0.364	0	11
SYT11	0	1.56306	0.771	0.12	0	11
CLDN11.1	0	1.50859	0.86	0.44	0	11
QKI	0	1.48048	0.963	0.746	0	11
FEZ1	0	1.47021	0.769	0.19	0	11
TUBA1A.7	0	1.46154	0.988	0.871	0	11
EDIL3.2	0	1.42357	0.789	0.199	0	11
SCD	0	1.4214	0.753	0.242	0	11
DPYSL2	0	1.41592	0.895	0.489	0	11
MARCKSL1.1	0	1.33239	0.886	0.733	0	11
DST	0	1.27418	0.958	0.708	0	11
LARP6	0	1.2476	0.768	0.218	0	11
RTN4.1	0	1.20957	0.998	0.97	0	11
C4orf48	0	1.14129	0.92	0.686	0	11
[truncated: 466 more rows]
